# Supplementary material for: Mechanistic analyses in kidney transplant recipients prospectively randomized to two steroid free regimen—Low dose Tacrolimus with Everolimus versus standard dose Tacrolimus with Mycophenolate Mofetil
Source: PubMed Central journal article supplement (PMC6538151; doi:10.1371/journal.pone.0216300), 2019-05-28
Supplement: pone.0216300.s004.pdf [file pone.0216300.s004.pdf]

**Table A: Clinical Data in Low Dose TAC + EVR Vs. TAC + MMF**

| Subject     |            | 3 Months Lab |             |             |           |           |           |            |            |      |            |              |             |             |           |          |              |          |             |          |                         |
|-------------|------------|--------------|-------------|-------------|-----------|-----------|-----------|------------|------------|------|------------|--------------|-------------|-------------|-----------|----------|--------------|----------|-------------|----------|-------------------------|
| Subject ID  | Study Drug | WBC3         | HGB3        | Creat3      | Chol3     | TG3       | HDL3      | LDL3       | FK3        | MPA3 | EVL3       | Ucr3         | Upro3       | pcr         | pcr Code3 | bkb13    | bku3         | cmv3     | eGFR3       | DSA3     | 0=class I, 1 = class II |
| E-01-R      | Tac + EVR  | 4.3          | 11.1        | 1.31        |           |           |           |            |            |      |            |              |             |             |           |          |              |          | >60         |          |                         |
| E-02-R      | Tac + EVR  | 5.7          | 10.4        | 1.13        |           |           |           |            | 6.4        |      |            | 43.4         | 4           | 0.09        | 0         | 0        | 0            | -        | >60         |          |                         |
| E-03-R      | Tac + EVR  | 3.8          | 16.4        | 1.19        |           |           |           |            | 8.7        |      |            | 112.4        | 36          | 0.32        | 0         | 0        | -            | -        | >60         | 0        |                         |
| E-11-R      | Tac + EVR  | 3.5          | 13          | 1.38        |           |           |           |            | 3.5        |      | 3.3        |              |             |             | -         | -        | -            | -        | 83          |          |                         |
| E-15-R      | Tac + EVR  | 3.3          | 11.6        | 1.19        |           |           |           |            | 5          |      | 4          | 49           | <4          | <1          | 0         | 0        | 0            | -        | >60         | -        |                         |
| E-18-R      | Tac + EVR  | 3.8          | 13          | 1.36        |           |           |           |            | 3.2        |      | 3.6        | 168.2        | 21          | 0.12        | 0         | 0        | 0            |          | >60         | 0        |                         |
| E-22-R      | Tac + EVR  | 3.2          | 13          | 1.19        |           |           |           |            | 8.5        |      | 5.8        | 42.4         | 4.5         | 0.11        | 0         | 0        | 0            |          | >60         |          |                         |
| E-23-R      | Tac + EVR  | 3.6          | 13.6        | 0.93        |           |           |           |            | 5.6        |      | 4.8        | 82.2         | 7           | 0.09        | 0         |          | 0            |          | >60         |          |                         |
| E-26-R      | Tac + EVR  | 4            | 13.7        | 0.85        |           |           |           |            | 4.9        |      | 4.5        | 145.1        | 14          | 0.1         | 0         | 0        | 0            |          | >60         |          |                         |
| E-27-R      | Tac + EVR  | 4.4          | 14.9        | 0.97        |           |           |           |            | 7.2        |      | 4.2        | 168          | 6.19        | 0.04        | 0         |          |              |          | 81          |          |                         |
| E-29-R      | Tac + EVR  | 5.4          | 12.2        | 1.55        |           |           |           |            | 3          |      | 3.1        | 173.9        | 46          | 0.26        | 0         |          | 0            |          | 50          |          |                         |
| E-30-R      | Tac + EVR  | 4.4          | 13.5        | 0.83        |           |           |           |            | 6.4        |      | 7.1        | 101.8        | 59          | 0.58        | 0         | 0        | 0            |          | >60         |          |                         |
| E-31-R      | Tac + EVR  | 3.3          | 11.7        | 0.85        | 194       | 70        | 58        | 122        | 6.9        |      | 5.2        | 188.3        | 33          | 0           | 0         | 0        | 5E+08        |          | >60         |          |                         |
| E-33-R      | Tac + EVR  | 2.2          | 12.3        | 0.72        |           |           |           |            | 7.6        |      | 1.9        | 35.1         | <4          | <1          | 0         |          |              |          | >60         |          |                         |
| E-34-R      | Tac + EVR  | 4.1          | 10.9        | 1.3         |           |           |           |            | <2         |      | 3.7        | 108.6        | 51          | 0.47        | 0         | 0        | 2E+07        |          | 41          |          |                         |
| E-37-R      | Tac + EVR  | 2.6          | 12.2        | 1.12        |           |           |           |            | 6.6        |      | 5.4        | 136          | 11          | 0.08        | 0         | 0        | 0            |          |             |          |                         |
| E-39-R      | Tac + EVR  | 6            | 10.6        | 1.09        |           |           |           |            | 5          |      | 3.7        |              |             |             |           | 0        | 0            |          | >60         |          |                         |
| E-40-R      | Tac + EVR  | 2.2          | 10.9        | 1.89        |           |           |           |            | 3.5        |      | 5.1        | 198.8        | 325         | 1.63        | 1         |          | 0            | 0        | 46          |          |                         |
| E-42-R      | Tac + EVR  | 5.3          | 11.6        | 1.41        |           |           |           |            | 3.2        |      | 6.6        | 18.5         | <4          |             | 0         |          |              |          | 57          |          |                         |
| E-43-R      | Tac + EVR  | 5.8          | 5.4         | 14          | 1.6       |           |           |            | 5.4        |      | 5.1        | 67.7         | 63          | 0.93        | 0         | 0        | 0            |          |             |          |                         |
| <b>Mean</b> |            | <b>4</b>     | <b>12.1</b> | <b>1.81</b> | <b>98</b> | <b>70</b> | <b>58</b> | <b>122</b> | <b>5.6</b> |      | <b>4.5</b> | <b>108.2</b> | <b>48.6</b> | <b>0.34</b> | <b>0</b>  | <b>0</b> | <b>4E+07</b> | <b>0</b> | <b>59.7</b> | <b>0</b> |                         |
| SD          |            | 1.1          | 2.18        | 2.88        | 136       |           |           |            | 1.8        |      | 1.3        | 59.19        | 82.3        | 0.45        | 0         | 0        | 1E+08        |          | 18.1        | 0        |                         |

|             |          |            |           |             |            |  |           |            |            |            |            |              |             |             |          |            |              |          |             |          |          |
|-------------|----------|------------|-----------|-------------|------------|--|-----------|------------|------------|------------|------------|--------------|-------------|-------------|----------|------------|--------------|----------|-------------|----------|----------|
| E-04-R      | Tac + MM | 3.6        | 12.3      | 1.1         |            |  |           |            | 5.1        |            |            | -            | -           | -           | -        | -          | -            | -        | >60         | -        |          |
| E-05-R      | Tac + MM | 1          | 12.2      | 1.02        |            |  |           |            | 16         |            |            | 137.5        | 29          | 0.21        | 0        | 0          | -            | -        | >60         | 1        | 1        |
| E-06-R      | Tac + MM | 2.5        | 12.1      | 1.68        |            |  |           |            | 4.8        | 13.4       |            | 44.2         | <4          | <1          | 0        | 0          | -            | -        | 47          |          |          |
| E-07-R      | Tac + MM | 2.5        | 12.1      | 1.68        |            |  |           |            | 10         |            |            | 91           | 350         | 3.85        | 2        | <250       | -            | -        | >60         |          |          |
| E-09-R      | Tac + MM | 7.5        | 12        | 1.05        |            |  |           |            | 6.8        |            |            | 87.5         | 20          | 0.23        | 0        | 0          | -            | -        | >60         | 0        |          |
| E-10-R      | Tac + MM | 1.8        | 11.6      | 1.77        |            |  |           |            |            |            |            | 106.4        | 39          | 0.37        | 0        | <250       | 6E+08        | -        | 52          |          |          |
| E-13-R      | Tac + MM | 6.6        | 13.2      | 0.74        |            |  |           |            | 8          |            |            | 42.5         | 5           | 0.12        | 0        | 0          | 3E+07        | -        | 86          | 0        |          |
| E-14-R      | Tac + MM | 1.1        | 10.7      | 1.55        |            |  |           |            | 7.8        |            |            | 148          | 59          | 0.4         | 0        | 0          | 0            | -        | 41          | -        |          |
| E-16-R      | Tac + MM | 2.3        | 13.3      | 1.33        |            |  |           |            | 8.1        |            |            | 112.2        | 14          | 0.12        | 0        | 0          | -            | -        | >60         | -        |          |
| E-17-R      | Tac + MM | 6.1        | 10.6      | 0.94        |            |  |           |            | 7.5        |            |            | 157.8        | 66          | 0.42        |          | 0          |              |          | >60         | 0        |          |
| E-19-R      | Tac + MM | 3.7        | 8.8       | 1.8         | 119        |  | 47        | 59         | 9.9        |            |            | 172.4        | 29          | 0.17        | 0        | 0          | 0            |          | 38          |          |          |
| E-20-R      | Tac + MM | 2.4        | 13.5      | 1.84        |            |  |           |            | 11         | 1.6        |            | 291.7        | 41          | 0.14        |          | 0          |              |          | 54          |          |          |
| E-21-R      | Tac + MM | 4.2        | 12.8      | 1.17        |            |  |           |            | 15         |            |            | 58           | <4          | <1          | 0        | 11750      | 1E+09        |          |             |          |          |
| E-24-R      | Tac + MM | 3.7        | 13.6      | 1.56        |            |  |           |            |            |            |            | 202.8        | 197         | 0.97        | 0        | 0          | 0            |          |             |          |          |
| E-25-R      | Tac + MM | 4.4        | 12.5      | 0.92        | 231        |  | 48        | 146        | 4          |            |            |              |             |             |          |            |              |          | 57          | 0        |          |
| E-28-R      | Tac + MM | 2.7        | 14.6      | 0.75        |            |  |           |            | 4.7        |            |            | 126.7        | 11          | 0.09        | 0        | 0          | 7E+07        |          | >60         | 0        |          |
| E-32-R      | Tac + MM | 6.2        | 10.7      | 1.36        |            |  |           |            | 14         |            |            | 34.9         | <4          | <1          | 0        | 0          | 0            |          |             | 0        |          |
| E-38-R      | Tac + MM | 7.3        | 10.2      | 1.73        |            |  |           |            | 6.5        |            | 5.3        |              |             |             | 0        | 0          |              |          | 38          |          |          |
| E-41-R      | Tac + MM | 5.9        | 12.3      | 2.05        |            |  |           |            | 5.7        |            |            |              |             |             |          |            | 0            |          | 38          |          |          |
| E-44-R      | Tac + MM | 5.8        | 9.9       | 1.14        |            |  |           |            | 10         |            |            | 76.9         | 14          | 0.18        | 0        | 0          | 0            |          |             |          |          |
| <b>Mean</b> |          | <b>4.1</b> | <b>12</b> | <b>1.36</b> | <b>175</b> |  | <b>48</b> | <b>103</b> | <b>8.6</b> | <b>7.5</b> | <b>5.3</b> | <b>118.2</b> | <b>67.2</b> | <b>0.56</b> | <b>0</b> | <b>783</b> | <b>2E+08</b> | <b>0</b> | <b>50.1</b> | <b>0</b> | <b>1</b> |
| SD          |          | 2.1        | 1.44      | 0.4         | 79         |  | 1         | 62         | 3.6        | 8.34       |            | 67.54        | 98.4        | 1.02        | 1        | 3034       | 4E+08        |          | 15.4        | 0        |          |

**Table A: Clinical Data in Low Dose TAC + EVR Vs. TAC + MMF**

| Subject     |            | 6 Months Lab |             |             |            |            |           |           |             |            |             |              |           |             |          |          |               |          |           |     |
|-------------|------------|--------------|-------------|-------------|------------|------------|-----------|-----------|-------------|------------|-------------|--------------|-----------|-------------|----------|----------|---------------|----------|-----------|-----|
| Subject ID  | Study Drug | WBC6         | HGB6        | Creat6      | Chol6      | TG         | HDL       | LDL       | FK          | MPA        | EVL         | Ucr          | Upro      | pcr         | pcr Code | bkbl     | bku           | cmv      | eGFR      | DSA |
| E-01-R      | Tac + EVR  | 6.6          | 11.3        | 1.84        |            |            |           |           | 7.2         | 3.9        |             |              |           |             |          |          |               |          |           | 47  |
| E-02-R      | Tac + EVR  | 4.9          | 11.6        | 1.37        |            |            |           |           | 7.9         | -          | 4.2         |              |           |             |          |          |               |          |           | 52  |
| E-03-R      | Tac + EVR  | 5.1          | 16.9        | 1.07        |            |            |           |           | 3.7         |            | 2.7         |              |           | -           |          |          |               |          |           | 87  |
| E-11-R      | Tac + EVR  | 2.4          | 13.8        | 1.4         |            |            |           |           | 2.6         |            | 3.4         | -            | -         | -           | -        | 0        | 0             | -        |           | 81  |
| E-15-R      | Tac + EVR  | 3.3          | 13.2        | 1.31        |            |            |           |           | 5.4         | 5.1        |             | 208          | 12        | 0.06        | 0        | 0        | 484885        | 0        |           | 58  |
| E-18-R      | Tac + EVR  | 4.6          | 14.6        | 2.76        |            |            |           |           | 3.3         |            | 2.9         | 72           | 8         | 0.11        | 0        | 0        | 0             |          |           | 37  |
| E-22-R      | Tac + EVR  | 5.9          | 14.5        | 1           | 128        | 102        | 46        | 62        | 5.4         | 4.7        |             |              |           |             |          |          |               |          |           |     |
| E-23-R      | Tac + EVR  | 4.3          | 13.5        | 0.98        |            |            |           |           | 2.8         | 1.8        |             |              |           |             |          |          |               |          |           | >60 |
| E-26-R      | Tac + EVR  | 3.3          | 13.4        | 0.72        |            |            |           |           | 5           | <1         |             |              |           |             |          |          |               | 0        |           | >60 |
| E-27-R      | Tac + EVR  | 6.97         | 16.2        | 0.98        |            |            |           |           | 4.3         |            |             |              |           |             |          | 0        | 761000        |          |           | 81  |
| E-29-R      | Tac + EVR  | 6.6          | 13          | 1.65        |            |            |           |           | 5           | 4.2        |             |              |           |             |          | 0        | 0             |          |           | 51  |
| E-30-R      | Tac + EVR  | 3.6          | 13.9        | 0.8         |            |            |           |           | 5.9         | 5          |             |              | 0         |             |          |          |               |          |           | 95  |
| E-31-R      | Tac + EVR  | 4            | 12.5        | 0.77        |            |            |           |           | 8.1         |            | 2.5         | 127          | 0         | 0           | 0        | 0        | 130241        |          |           | >60 |
| E-33-R      | Tac + EVR  | 6.4          | 12.2        | 0.79        | 195        | 154        | 55        | 115       | 4           | 3.9        |             | 53           | 8         | 0.15        | 0        | 0        | 0             |          |           | 79  |
| E-34-R      | Tac + EVR  | 4.3          | 13.7        | 1.69        |            |            |           |           | 4.4         |            | 3.5         | 222.9        | 83        | 0.37        | 0        | 0        | 0             |          |           | 31  |
| E-37-R      | Tac + EVR  | 2.9          | 13.3        | 1.17        |            |            |           |           |             |            |             |              |           |             |          |          | 0             |          |           | >60 |
| E-39-R      | Tac + EVR  | 7.3          | 11.3        | 1.22        |            |            |           |           | 5.1         | 4.7        |             |              |           |             |          | 0        | 0             |          |           | 62  |
| E-40-R      | Tac + EVR  | 4.8          | 13.6        | 1.76        | 171        | 442        | 32        |           | 10.7        |            | 10.2        | 160          | 203       | 1.27        | 1        | 0        | 0             |          |           | 41  |
| E-42-R      | Tac + EVR  | 5            | 11          | 2.2         |            |            |           |           | <2          |            |             |              |           |             |          |          |               |          |           | 31  |
| E-43-R      | Tac + EVR  | 8.7          | 14.5        | 2.33        |            |            |           |           | 5.7         |            | 3.6         |              |           |             |          |          |               |          |           | 21  |
| <b>Mean</b> |            | <b>5.05</b>  | <b>13.4</b> | <b>1.39</b> | <b>165</b> | <b>233</b> | <b>44</b> | <b>89</b> | <b>5.36</b> | <b>4.2</b> | <b>4.13</b> | <b>140.5</b> | <b>45</b> | <b>0.33</b> | <b>0</b> | <b>0</b> | <b>125102</b> | <b>0</b> | <b>57</b> |     |
| SD          |            | 1.65         | 1.54        | 0.57        | 34         | 183        | 12        | 37        | 2.05        | 1.1        | 2.51        | 69.65        | 76        | 0.48        | 0        | 0        | 256718        | 0        | 23        |     |

|             |          |             |             |            |            |            |           |           |             |            |        |              |           |             |          |           |              |          |           |          |
|-------------|----------|-------------|-------------|------------|------------|------------|-----------|-----------|-------------|------------|--------|--------------|-----------|-------------|----------|-----------|--------------|----------|-----------|----------|
| E-04-R      | Tac + MM | 3           | 12.7        | 1.05       |            |            |           |           | 3.9         |            |        | 165.3        | 20        | 0.12        | 0        | 0         | 0            | -        | -         |          |
| E-05-R      | Tac + MM | 7           | 13.2        | 9.3        |            |            |           |           | 3.6         |            |        | 137          | 97        | 0.71        | 0        | 0         | -            | 0        | 116       |          |
| E-06-R      | Tac + MM | 3.7         | 13.2        | 1.63       |            |            |           |           | 7.5         | 15         |        | 197          | 17        | 0.09        | 0        | -         | 2E+08        | -        | 43        |          |
| E-07-R      | Tac + MM | 6.6         | 12          | 1.21       |            |            |           |           | 5.4         | 1.1        |        | 134          | 101       | 0.75        | 0        | -         | -            | -        | 69        |          |
| E-09-R      | Tac + MM | 4.5         | 13.6        | 1.17       | 230        | 92         | 69        | 143       | 4.8         |            |        | 177          | 40        | 0.23        | 0        | 0         | -            | -        | 71        |          |
| E-10-R      | Tac + MM | 3.2         | 12.6        | 1.4        |            |            |           |           | 3.6         | 1.7        |        | 77           | 0         | 0           | 0        | ##        | 2E+06        | -        | 72        |          |
| E-13-R      | Tac + MM | 7           | 12.9        | 0.73       |            |            |           |           | 6.9         |            |        |              |           |             |          |           |              |          |           | >60      |
| E-14-R      | Tac + MM | 5.4         | 13.8        | 1.74       |            |            |           |           | 6.1         |            |        | 148          | 59        | 0.4         | 0        | 0         | 0            | -        | 41        |          |
| E-16-R      | Tac + MM | 4.2         | 13.7        | 1.31       |            |            |           |           | 3.1         |            |        | -            | -         | -           | -        | -         | 53168        |          | <60       |          |
| E-17-R      | Tac + MM | 3.3         | 13.6        | 1          |            |            |           |           | 6           |            |        | 101.7        | 30        | 0.29        | 0        |           | 1E+08        |          | >60       |          |
| E-19-R      | Tac + MM | 3           | 11.5        | 1.58       |            |            |           |           |             |            |        |              |           |             |          |           |              |          |           | 46       |
| E-20-R      | Tac + MM | 2.6         | 14.8        | 1.66       |            |            |           |           | 9.3         | 1.1        |        | 203.5        | 109       | 0.54        | 0        | 0         |              |          |           | 44       |
| E-21-R      | Tac + MM | 4.9         | 13          | 1          |            |            |           |           | 5           |            |        |              |           |             |          |           |              |          |           | 58       |
| E-24-R      | Tac + MM | 5.5         | 13.8        | 1.49       |            |            |           |           | 4.4         | 4.8        |        | 173.8        | 27        | 0.16        | 0        |           |              |          |           | 51       |
| E-25-R      | Tac + MM | 4.5         | 12.9        | 1.04       |            |            |           |           | 4.3         | 3.5        |        | 61           | 0         | 0           | 0        |           |              |          |           | 62       |
| E-28-R      | Tac + MM | 8.8         | 16.5        | 0.9        | 148        | 56         | 85        | 55        | 5.7         | 1.6        |        | 102.9        | 7         | 0.07        | 0        | ##        |              |          |           | >60      |
| E-32-R      | Tac + MM | 5.4         | 12.5        | 1.27       | 179        | 180        | 55        | 88        | 3           | 4.2        |        | 108          | 8         | 0.07        | 0        | 0         | <500         |          |           | 60       |
| E-38-R      | Tac + MM | 9.5         | 11.3        | 1.6        |            |            |           |           |             |            | on CSA |              |           |             |          |           |              |          |           | 0        |
| E-41-R      | Tac + MM | 5.6         | 14          | 1.7        |            |            |           |           | 7.4         |            |        | 91.4         | 17        | 0.19        | 0        |           |              |          |           | 47       |
| E-44-R      | Tac + MM | 7.2         | 12.8        | 1.26       |            |            |           |           | 6.3         |            |        |              |           |             |          |           |              |          |           | 59       |
| <b>Mean</b> |          | <b>5.25</b> | <b>13.2</b> | <b>1.7</b> | <b>186</b> | <b>109</b> | <b>70</b> | <b>95</b> | <b>5.35</b> | <b>4.2</b> |        | <b>134.1</b> | <b>38</b> | <b>0.26</b> | <b>0</b> | <b>##</b> | <b>6E+07</b> | <b>0</b> | <b>60</b> | <b>0</b> |
| SD          |          | 1.95        | 1.14        | 1.81       | 41         | 64         | 15        | 44        | 1.72        | 4.7        |        | 45.15        | 38        | 0.25        | 0        | ##        | 1E+08        |          | 19        |          |

**Table A: Clinical Data in Low Dose TAC + EVR Vs. TAC + MMF**

| Subject     |            | 3 Months Lab |             |            |            |            |           |           |             |     |          |              |           |             |          |          |             |           |           |          |                                          |  |
|-------------|------------|--------------|-------------|------------|------------|------------|-----------|-----------|-------------|-----|----------|--------------|-----------|-------------|----------|----------|-------------|-----------|-----------|----------|------------------------------------------|--|
| Subject ID  | Study Drug | WBC          | HGB         | Creat      | Chol       | TG         | HDL       | LDL       | FK          | MPA | EVL      | Ucr          | Upro      | pcr         | pcr Code | bkbl     | bku         | cmv       | eGFR      | DSA      | 0=class I, 1 = class II, 2= both classes |  |
| E-01-R      | Tac + EVR  |              |             |            |            |            |           |           |             |     |          |              |           |             |          |          |             |           |           |          |                                          |  |
| E-02-R      | Tac + EVR  | 5.2          | 12.7        | 1.08       | 179        |            | 38        | 75        | 4.6         |     | 3.2      | 66.6         | 5         | 0.08        | 0        | 0        | 0           |           | >60       |          |                                          |  |
| E-03-R      | Tac + EVR  | 5.5          | 23.9        | 1.08       | 247        |            | 42        | 174       | 5.7         |     | 5.8      | 116          | 373       | 3.22        | 2        | 0        | 0           |           | >60       | 0        |                                          |  |
| E-11-R      | Tac + EVR  | 2.5          | 15.1        | 1.22       | 178        |            | 49        | 120       | 2.4         |     | 4.4      | 120.8        | 14        | 0.12        | 0        | <50      | <50         | -         | >60       | 0        |                                          |  |
| E-15-R      | Tac + EVR  | 5.7          | 13.8        | 1.32       | 185        |            | 34        | 119       | 3.8         |     | 3.9      | 199.4        | 12        | 0.06        | 0        | 0        | 0           | -         | 55        |          |                                          |  |
| E-18-R      | Tac + EVR  | 5.2          | 16.7        | 1.5        | 198        |            | 30        | 116       | 3.2         |     | 3.1      | 327.1        | 31        | 0.09        | 0        | 0        | 0           |           | 59        |          |                                          |  |
| E-22-R      | Tac + EVR  | 8.3          | 14.6        | 1          |            |            |           |           | 6.5         |     | 5.3      | 84.8         | 9         | 0.11        | 0        |          | 0           |           | >60       |          |                                          |  |
| E-23-R      | Tac + EVR  | 7.5          | 14.5        | 1.02       |            |            |           |           | 3.1         |     | 3.3      |              | <1.5      |             |          | 0        |             |           | 97        |          |                                          |  |
| E-26-R      | Tac + EVR  | 3.3          | 13.4        | 0.72       |            |            |           |           | 2.8         |     | 2.6      |              |           |             |          | 0        | 0           |           | 94        |          |                                          |  |
| E-27-R      | Tac + EVR  | 6.1          | 18.8        | 1.08       | 199        |            | 53        | 127       | 10.7        |     | 6.2      | 132.7        | 11        | 0.08        | 0        | 0        | 0           |           | >60       |          |                                          |  |
| E-29-R      | Tac + EVR  | 5.8          | 14.1        | 1.5        | 98         |            | 31        | 109       | 4.9         |     | 4.3      | 103.3        | 19        | 0.18        | 0        | 0        | 0           | 51        |           |          |                                          |  |
| E-30-R      | Tac + EVR  | 5.7          | 13.5        | 0.73       | 188        |            | 45        | 67        | 5.3         |     | 6        | 182          | 10        | 0.05        | 0        | 0        | 57168       |           | >60       |          |                                          |  |
| E-31-R      | Tac + EVR  | 4.6          | 13          | 0.74       |            |            |           |           | 4.3         |     | 4.2      | 139.6        | 24        | 0.17        | 0        | 0        | 0           |           | >60       | 1        | 2                                        |  |
| E-33-R      | Tac + EVR  | 3.5          | 14.3        | 0.78       |            |            |           |           | 3.9         |     | 4.4      | 23           | 6         | 0.26        | 0        |          |             | 0         | 80        |          |                                          |  |
| E-34-R      | Tac + EVR  |              |             |            |            |            |           |           |             |     |          |              |           |             |          |          |             |           |           |          |                                          |  |
| E-37-R      | Tac + EVR  | 3.9          | 15          | 1.05       | 244        |            | 53        | 172       | 2.8         |     | 5.5      | 144.5        | 14        | 0.1         | 0        | 0        | 0           |           | >60       | 0        |                                          |  |
| E-39-R      | Tac + EVR  | 6.9          | 10.2        | 1.09       | 122        | 472        | 21        | 7         | 4.4         |     | 6.1      |              |           |             |          |          |             |           | 70        |          |                                          |  |
| E-40-R      | Tac + EVR  | 3.5          | 14.1        | 1.27       | 84         |            | 25        | 26        | 5.3         |     | 9.2      | 124.6        | 119       | 0.96        | 0        | 0        | 0           |           | 57        |          |                                          |  |
| E-42-R      | Tac + EVR  | 4.3          | 12.8        | 2          | 236        |            | 30        |           |             |     |          | 115.1        | 28        | 0.24        | 0        | 0        | 0           |           | 41        | 0        |                                          |  |
| E-43-R      | Tac + EVR  | 7.2          | 11.5        | 2.4        | 174        | 111        | 81        | 71        | 3.3         |     | 7.8      | 81           | 47        | 0.58        | 0        | 0        | 0           |           |           | 1        | 0                                        |  |
| <b>Mean</b> |            | <b>5.3</b>   | <b>14.6</b> | <b>1.2</b> | <b>179</b> | <b>292</b> | <b>41</b> | <b>99</b> | <b>4.53</b> |     | <b>5</b> | <b>130.7</b> | <b>48</b> | <b>0.42</b> | <b>0</b> | <b>0</b> | <b>4083</b> | <b>26</b> | <b>69</b> | <b>0</b> | <b>1</b>                                 |  |
| SD          |            | 1.6          | 2.98        | 0.44       | 52         | 255        | 16        | 51        | 1.96        |     | 1.7      | 69.61        | 94        | 0.81        | 1        | 0        | 15279       | 36        | 20        | 1        | 1.41421                                  |  |

|             |           |            |             |             |            |           |           |           |             |            |  |              |           |             |          |            |              |   |           |          |             |
|-------------|-----------|------------|-------------|-------------|------------|-----------|-----------|-----------|-------------|------------|--|--------------|-----------|-------------|----------|------------|--------------|---|-----------|----------|-------------|
| E-04-R      | Tac + MM  | 3.4        | 12.6        | 1.05        | 154        |           | 39        | 90        | 4.6         |            |  | 132.1        | 21        | 0.16        | 0        | 0          | 0            |   | >60       | 0        |             |
| E-05-R      | Tac + MM  | 5.3        | 13.8        | 1.12        | 111        |           | 27        | 77        | 7.5         |            |  | 120.5        | 76        | 0.63        | 0        | 0          | 0            |   | >60       | 1        | 0           |
| E-06-R      | Tac + MM  | 4.6        | 12.6        | 1.75        | 139        |           | 46        | 81        | 6.2         |            |  | 86.4         | 4         | 0.05        | 0        | 0          | 0            | - | 43        | 1        | 2           |
| E-07-R      | Tac + MM  | 6          | 13.8        | 1.16        | 146        |           | 39        | 81        | 7.1         |            |  | 111.3        | 11        | 0.1         | 0        | 0          | 0            | - | >60       | 0        |             |
| E-09-R      | Tac + MM  | 5.7        | 14          | 1.16        |            |           |           |           | 6.9         | 3          |  | 66           | 7         | 0.11        | 0        | <50        | -            | - | >60       |          |             |
| E-10-R      | Tac + MM  | 3.7        | 12.9        | 1.42        | 136        |           | 42        | 77        | 4.9         |            |  | 70.8         | 28        | 0.4         | 0        | 0          | 2807         | - | >60       | 1        | 1           |
| E-13-R      | Tac + MM  | 7.1        | 13.1        | 0.73        | 157        |           | 49        | 80        | 8.6         |            |  | 99.3         | 9         | 0.09        | 0        | <50        | 2E+06        | - | >60       |          |             |
| E-14-R      | Tac + MM  | 3.9        | 12.2        | 1.69        | 165        |           | 22        | -         | 6.1         |            |  | 192.7        | 19        | 0.1         | 0        | -          | -            | - | 41        |          |             |
| E-16-R      | Tac + MM  | 6.3        | 14.8        | 1.4         | 121        |           | 31        | 47        | 6.7         |            |  | 124.4        | 16        | 0.13        | 0        | 0          | 948          | - | 59        | 1        | 0           |
| E-17-R      | Tac + MM  | 4.2        | 14.1        | 0.8         | 124        | 85        | 40        | 67        | 6.1         | 2          |  |              |           |             |          |            |              |   | >60       |          |             |
| E-19-R      | Tac + MM  | 3.3        | 13.6        | 1.67        | 131        |           | 47        | 62        | 5.9         |            |  | 244.3        | 19        | 0.08        | 0        | 5024       | 2E+07        |   | 42        |          |             |
| E-20-R      | Tac + MM  | 2.8        | 16.2        | 1.69        |            |           |           |           | 8.1         |            |  | 186.9        | 144       | 0.77        | 0        |            | 0            |   | 53        |          |             |
| E-21-R      | Tac + MM  | 4.9        | 13.1        | 1.22        | 169        | 33        | 104       | 40        | 3           | 4          |  | 142.3        | 17        | 0.12        | 0        | 0          | 1889         |   | 55        | 0        |             |
| E-24-R      | Tac + MMF |            |             |             |            |           |           |           |             |            |  |              |           |             |          |            |              |   |           |          |             |
| E-25-R      | Tac + MM  | 5.2        | 14.6        | 1.11        | 212        |           | 45        | 138       | 7.9         |            |  | 117.8        | 17        | 0.14        | 0        | 0          | 0            |   | 52        | 0        |             |
| E-28-R      | Tac + MM  | 4.9        | 16.1        | 0.8         | 136        |           | 66        | 60        | 6.4         |            |  | 82.7         | 10        | 0.12        | 0        | 0          | 0            |   | >60       |          |             |
| E-32-R      | Tac + MM  | 56         | 12.3        | 1.13        | 152        |           | 43        | 79        | 4.6         | 3          |  | 196          | 14        | 0.07        | 0        | 0          | 0            |   | >60       | 0        |             |
| E-38-R      | Tac + MMF |            |             |             |            |           |           |           |             |            |  |              |           |             |          |            |              |   |           |          |             |
| E-41-R      | Tac + MM  | 4.1        | 14.5        | 1.92        | 189        |           | 35        | 101       | 8.8         |            |  | 131.1        | 31        | 0.24        | 0        | 0          | 0            |   | 41        |          |             |
| E-44-R      | Tac + MMF |            |             |             |            |           |           |           |             |            |  |              |           |             |          |            |              |   |           |          |             |
| <b>Mean</b> |           | <b>7.7</b> | <b>13.8</b> | <b>1.28</b> | <b>149</b> | <b>59</b> | <b>45</b> | <b>77</b> | <b>6.44</b> | <b>3.0</b> |  | <b>131.5</b> | <b>28</b> | <b>0.21</b> | <b>0</b> | <b>419</b> | <b>1E+06</b> |   | <b>48</b> | <b>0</b> | <b>0.75</b> |
| SD          |           | 12         | 1.19        | 0.36        | 27         | 37        | 19        | 24        | 1.55        | 1          |  | 50.34        | 35        | 0.21        | 0        |            | 5E+06        |   | 7.3       | 1        | 0.95743     |

**Table A: Clinical Data in Low Dose TAC + EVR Vs. TAC + MMF**

| Subject     |            | 18 Months Lab |             |             |            |            |           |            |             |     |            |              |           |              |          |          |          |           |           |     |                                          |  |
|-------------|------------|---------------|-------------|-------------|------------|------------|-----------|------------|-------------|-----|------------|--------------|-----------|--------------|----------|----------|----------|-----------|-----------|-----|------------------------------------------|--|
| Subject ID  | Study Drug | WBC           | HGB         | Creat       | Chol       | TG         | HDL       | LDL        | FK          | MPA | EVL        | Ucr          | Upro      | pcr          | pcr Code | bkbl     | bku      | cmv       | eGFR      | DSA | 0=class I, 1 = class II, 2= both classes |  |
| E-01-R      | Tac + EVR  |               |             |             |            |            |           |            |             |     |            |              |           |              |          |          |          |           |           |     |                                          |  |
| E-02-R      | Tac + EVR  | 6             | 13.2        | 1.16        |            |            |           |            | 7.9         |     | 5.6        | -            | -         | -            | -        | -        | -        | -         |           | 63  |                                          |  |
| E-03-R      | Tac + EVR  |               |             |             |            |            |           |            |             |     |            |              |           | -            |          |          |          |           |           |     |                                          |  |
| E-11-R      | Tac + EVR  | 3.4           | 15.3        | 1.27        |            |            |           |            | 4.2         |     | 6.6        | -            | -         | -            | -        | 0        | 0        | -         |           | 90  |                                          |  |
| E-15-R      | Tac + EVR  | 3.6           | 14.3        | 1.34        |            |            |           |            | 4.8         |     | 4.5        |              |           |              |          |          |          |           |           | 56  |                                          |  |
| E-18-R      | Tac + EVR  | 6.2           | 15.1        | 1.39        |            |            |           |            | 8.8         |     | 3.6        | 157          | 12        | 0.08         | 0        | 0        |          |           |           | 71  |                                          |  |
| E-22-R      | Tac + EVR  | 7.3           | 14.9        | 1           | 154        | 95         | 54        | 81         | 7.1         |     |            |              |           |              |          |          |          |           |           | >60 |                                          |  |
| E-23-R      | Tac + EVR  | 5.4           | 15.7        | 0.84        | 221        | 419        | 39        | N/a        | 4.7         |     | 3.2        |              | 0         | 0            |          |          |          |           |           | 116 |                                          |  |
| E-26-R      | Tac + EVR  |               |             |             |            |            |           |            |             |     |            |              |           |              |          |          |          |           |           |     |                                          |  |
| E-27-R      | Tac + EVR  |               |             |             | 215        |            | 58        | 134        |             |     |            |              |           |              |          |          |          |           |           |     |                                          |  |
| E-29-R      | Tac + EVR  | 7             | 14.3        | 1.57        | 191        | 150        | 38        | 123        | 4.3         |     | 4.3        | 100          | 18        | 0.18         | 0        |          |          |           |           | 54  |                                          |  |
| E-30-R      | Tac + EVR  |               |             |             |            |            |           |            |             |     |            | 18           |           | 0            |          |          |          |           |           |     |                                          |  |
| E-31-R      | Tac + EVR  |               |             |             |            |            |           |            |             |     |            |              |           |              |          |          |          |           |           |     |                                          |  |
| E-33-R      | Tac + EVR  |               |             |             |            |            |           |            |             |     |            |              |           |              |          |          |          |           |           |     |                                          |  |
| E-34-R      | Tac + EVR  |               |             |             |            |            |           |            |             |     |            |              |           |              |          |          |          |           |           |     |                                          |  |
| E-37-R      | Tac + EVR  |               |             |             |            |            |           |            |             |     |            |              |           |              |          |          |          |           |           |     |                                          |  |
| E-39-R      | Tac + EVR  |               |             |             |            |            |           |            |             |     |            |              |           |              |          |          |          |           |           |     |                                          |  |
| E-40-R      | Tac + EVR  |               |             |             |            |            |           |            |             |     |            |              |           |              |          |          |          |           |           |     |                                          |  |
| E-42-R      | Tac + EVR  |               |             |             |            |            |           |            |             |     |            |              |           |              |          |          |          |           |           |     |                                          |  |
| E-43-R      | Tac + EVR  |               |             |             |            |            |           |            |             |     |            |              |           |              |          |          |          |           |           |     |                                          |  |
| <b>Mean</b> |            | <b>5.6</b>    | <b>14.7</b> | <b>1.22</b> | <b>195</b> | <b>221</b> | <b>47</b> | <b>113</b> | <b>5.97</b> |     | <b>4.6</b> | <b>68.75</b> | <b>10</b> | <b>0.065</b> | <b>0</b> | <b>0</b> | <b>0</b> | <b>##</b> | <b>75</b> |     |                                          |  |
| SD          |            | 1.5           | 0.83        | 0.25        | 30         | 173        | 10        | 28         | 1.91        |     | 1.3        | 73.18        | 9.2       | 0.0854       | 0        | 0        |          |           |           | ##  | 24                                       |  |

|             |           |            |             |             |            |            |           |           |             |          |  |              |           |             |          |          |            |          |           |          |          |  |
|-------------|-----------|------------|-------------|-------------|------------|------------|-----------|-----------|-------------|----------|--|--------------|-----------|-------------|----------|----------|------------|----------|-----------|----------|----------|--|
| E-04-R      | Tac + MMF | 4.9        | 12.1        | 1.09        |            |            |           |           | 4.8         |          |  |              |           | -           |          |          |            |          |           |          | >60      |  |
| E-05-R      | Tac + MMF |            |             |             |            |            |           |           |             |          |  |              |           |             |          |          |            |          |           |          |          |  |
| E-06-R      | Tac + MMF | 5.8        | 13          | 1.57        | 139        |            | 46        | 81        | 6.2         |          |  | 86.4         | 4         | <1          | 0        | 0        | 51         | -        |           | 1        | 2        |  |
| E-07-R      | Tac + MMF | 6.9        | 13.4        | 1.05        |            |            |           |           | 6.3         | 1.1      |  | 130          | 12        | 0.09        | 0        | -        | -          | -        |           | 81       |          |  |
| E-09-R      | Tac + MMF | 4.9        | 14.5        | 1.16        | 237        | 115        | 45        | 169       | 6.1         | 8.7      |  | 215          | 37        | 0.17        | 0        | 0        | -          | -        |           | 71       |          |  |
| E-10-R      | Tac + MMF | 2.6        | 13.7        | 1.19        |            |            |           |           | 6           | 1.8      |  | 59           | 109       | 1.85        | 0        | -        | -          | -        |           | 76       |          |  |
| E-13-R      | Tac + MMF |            |             |             |            |            |           |           |             |          |  |              |           |             |          |          |            |          |           |          |          |  |
| E-14-R      | Tac + MMF | 3.4        | 12.2        | 1.67        |            |            |           |           | 3.1         |          |  |              |           |             |          |          |            |          |           | 45       |          |  |
| E-16-R      | Tac + MMF | 5.1        | 14.1        | 1.3         | 144        | 217        | 40        | 61        | 6.6         |          |  | 164.8        | 23        | 0.14        | -        |          |            |          |           | >60      | 0        |  |
| E-17-R      | Tac + MMF |            |             |             |            |            |           |           |             |          |  |              |           |             |          |          |            |          |           |          |          |  |
| E-19-R      | Tac + MMF | 4.5        | 13.1        | 1.41        |            |            |           |           | 4.9         |          |  |              |           |             |          | 0        | 493        | 0        |           | 51       |          |  |
| E-20-R      | Tac + MMF | 2.3        | 16.7        | 1.98        | 303        |            | 39        | N/A       | 7.9         | 4.2      |  | 105          | 58        | 0.55        | 0        | 0        |            |          | 0         | 44       |          |  |
| E-21-R      | Tac + MMF | 4.8        | 12.7        | 1.08        |            |            |           |           | 3.5         |          |  |              |           |             |          |          |            |          |           | 58       |          |  |
| E-24-R      | Tac + MMF |            |             |             |            |            |           |           |             |          |  |              |           |             |          |          |            |          |           |          |          |  |
| E-25-R      | Tac + MMF | 6.3        | 13.8        | 0.95        |            |            |           |           | 10.4        |          |  |              |           |             |          |          |            |          |           | 68       |          |  |
| E-28-R      | Tac + MMF | 5          | 15.6        | 0.7         | 125        | 68         | 63        | 48        | 6.3         |          |  |              |           |             |          | 0        | 0          |          |           | >60      |          |  |
| E-32-R      | Tac + MMF | 7.8        | 13.1        | 1.07        |            |            |           |           | 8.3         | 4        |  | 51           | <4        | <1          | 0        |          |            |          |           | 73       |          |  |
| E-38-R      | Tac + MMF |            |             |             |            |            |           |           |             |          |  |              |           |             |          |          |            |          |           |          |          |  |
| E-41-R      | Tac + MMF |            |             |             |            |            |           |           |             |          |  |              |           |             |          |          |            |          |           |          |          |  |
| E-44-R      | Tac + MMF |            |             |             |            |            |           |           |             |          |  |              |           |             |          |          |            |          |           |          |          |  |
| <b>Mean</b> |           | <b>4.9</b> | <b>13.7</b> | <b>1.25</b> | <b>190</b> | <b>133</b> | <b>47</b> | <b>90</b> | <b>6.18</b> | <b>4</b> |  | <b>115.9</b> | <b>41</b> | <b>0.56</b> | <b>0</b> | <b>0</b> | <b>181</b> | <b>0</b> | <b>63</b> | <b>1</b> | <b>2</b> |  |
| SD          |           | 1.6        | 1.31        | 0.34        | 77         | 76         | 10        | 55        | 1.95        | 3        |  | 58.95        | 39        | 0.7439      | 0        | 0        | 271        | 0        | 14        | 1        |          |  |

**Table A: Clinical Data in Low Dose TAC + EVR Vs. TAC + MMF**

| Subject     |            | 24 Months Lab |             |             |            |           |           |            |            |     |            |              |          |                |          |          |          |     |           |          |                                          |  |
|-------------|------------|---------------|-------------|-------------|------------|-----------|-----------|------------|------------|-----|------------|--------------|----------|----------------|----------|----------|----------|-----|-----------|----------|------------------------------------------|--|
| Subject ID  | Study Drug | WBC           | HGB         | Creat       | Chol       | TG        | HDL       | LDL        | FK         | MPA | EVL        | Ucr          | Upro     | pcr            | pcr Code | bkbl     | bku      | cmv | eGFR      | DSA      | 0=class I, 1 = class II, 2= both classes |  |
| E-01-R      | Tac + EVR  |               |             |             |            |           |           |            |            |     |            |              |          |                |          |          |          |     |           |          |                                          |  |
| E-02-R      | Tac + EVR  | 5.4           | 13.7        | 1.13        | 162        |           | 41        | 77         | 6.2        |     | 4.3        | 94.3         | 6        | 0.06           | 0        | 0        | 0        |     | >60       |          |                                          |  |
| E-03-R      | Tac + EVR  |               |             |             |            |           |           |            |            |     |            |              |          |                |          |          |          |     |           | 0        |                                          |  |
| E-11-R      | Tac + EVR  | 3.9           | 14.8        | 1.16        | 199        | 74        | 53        | 131        | 4.6        |     | 6.9        | 28.5         | 4        | 0.14           |          |          |          |     | >60       |          |                                          |  |
| E-15-R      | Tac + EVR  | 5.6           | 11.8        | 1.21        |            |           |           |            | 2.4        |     | 3.1        | 169          | 9        | 0.05           | 0        |          |          |     | 63        |          |                                          |  |
| E-18-R      | Tac + EVR  | 6.1           | 16.2        | 1.47        |            |           |           |            |            |     |            |              |          |                |          |          |          |     |           |          |                                          |  |
| E-22-R      | Tac + EVR  |               |             |             |            |           |           |            |            |     |            |              |          |                |          |          |          |     |           |          |                                          |  |
| E-23-R      | Tac + EVR  |               |             |             |            |           |           |            |            |     |            |              |          |                |          |          |          |     |           |          |                                          |  |
| E-26-R      | Tac + EVR  |               |             |             |            |           |           |            |            |     |            |              |          |                |          |          |          |     |           |          |                                          |  |
| E-27-R      | Tac + EVR  |               |             |             |            |           |           |            |            |     |            |              |          |                |          |          |          |     |           |          |                                          |  |
| E-29-R      | Tac + EVR  |               |             |             |            |           |           |            |            |     |            |              |          |                |          |          |          |     |           |          |                                          |  |
| E-30-R      | Tac + EVR  |               |             |             |            |           |           |            |            |     |            |              |          |                |          |          |          |     |           |          |                                          |  |
| E-31-R      | Tac + EVR  |               |             |             |            |           |           |            |            |     |            |              |          |                |          |          |          |     |           |          |                                          |  |
| E-33-R      | Tac + EVR  |               |             |             |            |           |           |            |            |     |            |              |          |                |          |          |          |     |           |          |                                          |  |
| E-34-R      | Tac + EVR  |               |             |             |            |           |           |            |            |     |            |              |          |                |          |          |          |     |           |          |                                          |  |
| E-37-R      | Tac + EVR  |               |             |             |            |           |           |            |            |     |            |              |          |                |          |          |          |     |           |          |                                          |  |
| E-39-R      | Tac + EVR  |               |             |             |            |           |           |            |            |     |            |              |          |                |          |          |          |     |           |          |                                          |  |
| E-40-R      | Tac + EVR  |               |             |             |            |           |           |            |            |     |            |              |          |                |          |          |          |     |           |          |                                          |  |
| E-42-R      | Tac + EVR  |               |             |             |            |           |           |            |            |     |            |              |          |                |          |          |          |     |           |          |                                          |  |
| E-43-R      | Tac + EVR  |               |             |             |            |           |           |            |            |     |            |              |          |                |          |          |          |     |           |          |                                          |  |
| <b>Mean</b> |            | <b>5.3</b>    | <b>14.1</b> | <b>1.24</b> | <b>181</b> | <b>74</b> | <b>47</b> | <b>104</b> | <b>4.4</b> |     | <b>4.8</b> | <b>97.27</b> | <b>6</b> | <b>0.08333</b> | <b>0</b> | <b>0</b> | <b>0</b> |     | <b>63</b> | <b>0</b> |                                          |  |
| SD          |            | 0.9           | 1.86        | 0.16        | 26         |           | 8         | 38         | 1.9        |     | 1.9        | 70.3         | 3        | 0.04933        | 0        |          |          |     |           |          |                                          |  |

|             |           |            |             |             |            |  |           |            |            |            |  |              |           |                |          |           |               |   |           |          |          |
|-------------|-----------|------------|-------------|-------------|------------|--|-----------|------------|------------|------------|--|--------------|-----------|----------------|----------|-----------|---------------|---|-----------|----------|----------|
| E-04-R      | Tac + MMF | 4.4        | 13.5        | 1.09        | 184        |  | 45        | 101        | 5.5        |            |  | 99.8         | 20        | 0.2            | 0        | 165       | 300652        |   | >60       | 0        |          |
| E-05-R      | Tac + MMF | 7.2        | 13.2        | 1.09        | 148        |  | 25        | 111        | 9.1        |            |  | 161.4        | 95        | 0.59           | 0        | 0         | 0             |   | >60       | 1        | 0        |
| E-06-R      | Tac + MMF | 5.9        | 13.1        | 1.45        | 154        |  | 55        | 88         |            |            |  | 69.7         | 5         | 0.07           | 0        |           |               |   | 49        |          |          |
| E-07-R      | Tac + MMF | 7.1        | 13.8        | 0.95        |            |  |           |            | 6          | 1.2        |  | -            | -         |                | -        | -         | -             | - | 92        |          |          |
| E-09-R      | Tac + MMF |            |             |             |            |  |           |            |            |            |  |              |           |                |          |           |               |   |           |          |          |
| E-10-R      | Tac + MMF |            |             |             |            |  |           |            |            |            |  |              |           |                |          |           |               |   |           |          |          |
| E-13-R      | Tac + MMF |            |             |             |            |  |           |            |            |            |  |              |           |                |          |           |               |   |           |          |          |
| E-14-R      | Tac + MMF |            |             |             |            |  |           |            |            |            |  |              |           |                |          |           |               |   |           |          |          |
| E-16-R      | Tac + MMF |            |             |             |            |  |           |            |            |            |  |              |           |                |          |           |               |   |           |          |          |
| E-17-R      | Tac + MMF |            |             |             |            |  |           |            |            |            |  |              |           |                |          |           |               |   |           |          |          |
| E-19-R      | Tac + MMF |            |             |             |            |  |           |            |            |            |  |              |           |                |          |           |               |   |           |          |          |
| E-20-R      | Tac + MMF |            |             |             |            |  |           |            |            |            |  |              |           |                |          |           |               |   |           |          |          |
| E-21-R      | Tac + MMF |            |             |             |            |  |           |            |            |            |  |              |           |                |          |           |               |   |           |          |          |
| E-24-R      | Tac + MMF |            |             |             |            |  |           |            |            |            |  |              |           |                |          |           |               |   |           |          |          |
| E-25-R      | Tac + MMF |            |             |             |            |  |           |            |            |            |  |              |           |                |          |           |               |   |           |          |          |
| E-28-R      | Tac + MMF |            |             |             |            |  |           |            |            |            |  |              |           |                |          |           |               |   |           |          |          |
| E-32-R      | Tac + MMF |            |             |             |            |  |           |            |            |            |  |              |           |                |          |           |               |   |           |          |          |
| E-38-R      | Tac + MMF |            |             |             |            |  |           |            |            |            |  |              |           |                |          |           |               |   |           |          |          |
| E-41-R      | Tac + MMF |            |             |             |            |  |           |            |            |            |  |              |           |                |          |           |               |   |           |          |          |
| E-44-R      | Tac + MMF |            |             |             |            |  |           |            |            |            |  |              |           |                |          |           |               |   |           |          |          |
| <b>Mean</b> |           | <b>6.2</b> | <b>13.4</b> | <b>1.15</b> | <b>162</b> |  | <b>42</b> | <b>100</b> | <b>6.9</b> | <b>1.2</b> |  | <b>110.3</b> | <b>40</b> | <b>0.28667</b> | <b>0</b> | <b>83</b> | <b>150326</b> |   | <b>71</b> | <b>1</b> | <b>0</b> |
| SD          |           | 1.3        | 0.32        | 0.21        | 19         |  | 15        | 12         | 2          |            |  | 46.74        | 48        | 0.27062        | 0        | 117       | 212593        |   | 30        | 1        |          |

**Table A: Clinical Data in Low Dose TAC + EVR Vs. TAC + MMF**

| Subject     |            | Rejection  |                       |                   |                   |               |          |          |            |                        |                           |          |             |                   |
|-------------|------------|------------|-----------------------|-------------------|-------------------|---------------|----------|----------|------------|------------------------|---------------------------|----------|-------------|-------------------|
| Subject ID  | Study Drug | Rejection  | Date of 1st Rejection | Type of rejection | Borderline change | Graft failure | Death    | BK blood | BK urine   | CMV/QNT or CMV DNA/PCR | Proteinuria (PC ratio >1) | Group    | FU time     | FU time rejection |
| E-01-R      | Tac + EVR  | 1          | 4/18/2013             | 1                 |                   |               |          |          |            |                        |                           | 0        |             |                   |
| E-02-R      | Tac + EVR  | 0          |                       |                   | 0                 | 0             | 0        | 0        | 0          | 0                      | 0                         | 1        | 33          | 33                |
| E-03-R      | Tac + EVR  | 0          |                       |                   | 0                 | 0             | 0        | 0        | 0          | 0                      | 1                         | 1        | 34          | 34                |
| E-11-R      | Tac + EVR  | 0          |                       |                   | 0                 | 0             | 0        | 0        | 0          | 0                      | 1                         | 1        | 34          | 34                |
| E-15-R      | Tac + EVR  | 0          |                       |                   | 1                 | 0             | 0        | 1        | 1          | 0                      | 0                         | 1        | 29          | 29                |
| E-18-R      | Tac + EVR  | 0          |                       |                   | 0                 | 0             | 0        | 1        | 1          | 0                      | 1                         | 1        | 33          | 33                |
| E-22-R      | Tac + EVR  | 0          |                       |                   | 0                 | 0             | 0        | 0        | 0          | 0                      | 0                         | 1        | 32          | 32                |
| E-23-R      | Tac + EVR  | 0          |                       |                   | 0                 | 0             | 0        | 0        | 1          | 0                      | 0                         | 1        | 31          | 31                |
| E-26-R      | Tac + EVR  | 0          |                       |                   | 0                 | 0             | 0        | 0        | 0          | 0                      | 0                         | 1        | 29          | 29                |
| E-27-R      | Tac + EVR  | 0          |                       |                   | 0                 | 0             | 0        | 0        | 1          | 0                      | 1                         | 1        | 20          | 20                |
| E-29-R      | Tac + EVR  | 0          |                       |                   | 1                 | 0             | 0        | 0        | 0          | 0                      | 0                         | 1        | 25          | 25                |
| E-30-R      | Tac + EVR  | 0          |                       |                   | 1                 | 0             | 0        | 0        | 1          |                        | 0                         | 1        | 27          | 27                |
| E-31-R      | Tac + EVR  | 1          | 12/29/2015            | 1                 | 0                 | 0             | 0        | 1        | 1          |                        | 1                         | 1        | 30          | 25                |
| E-33-R      | Tac + EVR  | 0          |                       |                   | 0                 | 0             | 0        | 0        | 0          | 0                      | 0                         | 1        | 29          | 29                |
| E-34-R      | Tac + EVR  | 0          |                       |                   | 0                 | 0             | 0        |          |            |                        |                           | 1        |             |                   |
| E-37-R      | Tac + EVR  | 0          |                       |                   | 0                 | 0             | 0        | 0        | 0          |                        | 0                         | 1        | 24          | 24                |
| E-39-R      | Tac + EVR  | 0          |                       |                   | 1                 | 0             | 0        | 0        | 0          |                        | 1                         | 1        | 27          | 27                |
| E-40-R      | Tac + EVR  | 0          |                       |                   | 0                 | 0             | 0        | 0        | 0          | 0                      | 1                         | 1        | 26          | 26                |
| E-42-R      | Tac + EVR  | 0          |                       |                   | 1                 | 0             | 0        | 0        | 0          | 0                      | 0                         | 1        | 5           | 5                 |
| E-43-R      | Tac + EVR  | 0          |                       |                   | 0                 | 0             | 0        | 0        | 0          | 0                      | 0                         | 1        | 16          | 16                |
| <b>Mean</b> |            | <b>0.1</b> | <b>41874.5</b>        | <b>1</b>          | <b>0.26</b>       | <b>0</b>      | <b>0</b> | <b>0</b> | <b>0.3</b> | <b>0</b>               | <b>0.3889</b>             | <b>1</b> | <b>26.9</b> | <b>26.6111</b>    |
| SD          |            | 0.3        | 696.50018             | 0                 | 0.45              | 0             | 0        | 0        | 0.5        | 0                      | 0.5016                    | 0        | 7.28        | 7.24479           |

|             |           |            |                 |          |            |          |          |          |            |             |             |          |             |              |
|-------------|-----------|------------|-----------------|----------|------------|----------|----------|----------|------------|-------------|-------------|----------|-------------|--------------|
| E-04-R      | Tac + MMF | 0          |                 |          | 1          | 0        | 0        | 0        | 1          | 0           | 0           | 0        | 39          | 39           |
| E-05-R      | Tac + MMF | 0          |                 |          | 0          | 0        | 0        | 0        | 0          | 0           | 0           | 0        | 37          | 37           |
| E-06-R      | Tac + MMF | 1          | 6/10/2014       | 1        | 0          | 0        | 0        | 0        | 1          |             | 0           | 0        | 23          | 12           |
| E-07-R      | Tac + MMF | 0          |                 |          | 0          | 0        | 0        | 0        | 0          | 0           | 1           | 0        | 35          | 35           |
| E-09-R      | Tac + MMF | 0          |                 |          | 0          | 0        | 0        | 0        | 0          | 0           | 0           | 0        | 35          | 35           |
| E-10-R      | Tac + MMF | 1          | 7/10/2014       | 1        | 1          | 0        | 0        | 1        | 1          | 0           | 1           | 0        | 33          | 12           |
| E-13-R      | Tac + MMF | 0          |                 |          | 0          | 0        | 0        | 0        | 1          |             | 1           | 0        | 33          | 33           |
| E-14-R      | Tac + MMF | 0          |                 |          | 1          | 0        | 0        | 0        | 1          | 0           | 0           | 0        | 15          | 15           |
| E-16-R      | Tac + MMF | 1          | 8/7/2014        | 1        | 1          | 0        | 0        | 0        | 1          | 1           | 0           | 0        | 30          | 12           |
| E-17-R      | Tac + MMF | 0          |                 |          | 0          | 0        | 0        | 0        | 1          | 0           | 1           | 0        | 11          | 11           |
| E-19-R      | Tac + MMF | 0          |                 |          | 1          | 0        | 0        | 1        | 1          | 0           | 0           | 0        | 32          | 32           |
| E-20-R      | Tac + MMF | 0          |                 |          | 0          | 0        | 0        | 0        | 0          | 0           | 1           | 0        | 26          | 26           |
| E-21-R      | Tac + MMF | 0          |                 |          | 0          | 0        | 0        | 0        | 0          | 0           | 0           | 0        | 30          | 30           |
| E-24-R      | Tac + MMF | 0          |                 |          | 0          | 0        | 0        | 0        | 0          |             | 1           | 0        | 5           | 5            |
| E-25-R      | Tac + MMF | 0          |                 |          | 0          | 0        | 0        | 0        | 1          | 0           | 0           | 0        | 26          | 26           |
| E-28-R      | Tac + MMF | 1          | 12/2/2014       | 1        | 0          | 0        | 0        | 0        | 1          | 1           | 0           | 0        | 12          | 12           |
| E-32-R      | Tac + MMF | 0          |                 |          | 1          | 0        | 0        | 0        | 1          | 0           | 0           | 0        | 29          | 29           |
| E-38-R      | Tac + MMF | 0          |                 |          | 0          | 0        | 0        | 1        | 1          | 0           | 0           | 1        | 5           | 5            |
| E-41-R      | Tac + MMF | 0          |                 |          | 0          | 0        | 0        | 0        | 0          | 0           | 1           | 0        | 16          | 16           |
| E-44-R      | Tac + MMF | 0          |                 |          | 0          | 0        | 0        | 0        | 0          | 0           | 0           | 0        | 13          | 13           |
| <b>Mean</b> |           | <b>0.2</b> | <b>41865.75</b> | <b>1</b> | <b>0.3</b> | <b>0</b> | <b>0</b> | <b>0</b> | <b>0.6</b> | <b>0.12</b> | <b>0.35</b> | <b>0</b> | <b>24.3</b> | <b>21.75</b> |
| SD          |           | 0.4        | 76.587096       | 0        | 0.47       | 0        | 0        | 0        | 0.5        | 0.33        | 0.4894      | 0        | 10.9        | 11.4288      |

**Table A:** Clinical Data in Low Dose TAC + EVR Vs. TAC + MMF

| Subject     |            |                                                               |
|-------------|------------|---------------------------------------------------------------|
| Subject ID  | Study Drug | Adverse events / Comments                                     |
| E-01-R      | Tac + EVR  |                                                               |
| E-02-R      | Tac + EVR  | Herpes Zoster (3/2014)                                        |
| E-03-R      | Tac + EVR  | Herpes Zoster (6/2013); Erythrocytosis                        |
| E-11-R      | Tac + EVR  |                                                               |
| E-15-R      | Tac + EVR  |                                                               |
| E-18-R      | Tac + EVR  |                                                               |
| E-22-R      | Tac + EVR  | Noncompliance with medication (2/28/14)                       |
| E-23-R      | Tac + EVR  | giardiasis (12/16/2013)                                       |
| E-26-R      | Tac + EVR  |                                                               |
| E-27-R      | Tac + EVR  | no urine creatinine                                           |
| E-29-R      | Tac + EVR  | C. diff infection (1/2/2014)                                  |
| E-30-R      | Tac + EVR  | UTI (3/20/2014) / switched medication to MPA                  |
| E-31-R      | Tac + EVR  | assuming 2+ is positive for proteinuria                       |
| E-33-R      | Tac + EVR  |                                                               |
| E-34-R      | Tac + EVR  | withdrawn                                                     |
| E-37-R      | Tac + EVR  |                                                               |
| E-39-R      | Tac + EVR  | Hypertension (1/22/2015)                                      |
| E-40-R      | Tac + EVR  | ulcerative stomatitis and mucositis, neutropenia (7/15/ 2014) |
| E-42-R      | Tac + EVR  | Oral aphthae (7/29/2014) / taken off tacrolimus               |
| E-43-R      | Tac + EVR  |                                                               |
| <b>Mean</b> |            |                                                               |
| SD          |            |                                                               |

|             |           |                                                                                                                                                 |
|-------------|-----------|-------------------------------------------------------------------------------------------------------------------------------------------------|
| E-04-R      | Tac + MMF | Cholecystitis (7/2014) Only taking tacrolimus, proteinuria only immediately after transplant (prior to measuring immunosuppression medications) |
| E-05-R      | Tac + MMF | Drug induced neutropenia (8/12/2013) / 2+ for protein?                                                                                          |
| E-06-R      | Tac + MMF |                                                                                                                                                 |
| E-07-R      | Tac + MMF |                                                                                                                                                 |
| E-09-R      | Tac + MMF |                                                                                                                                                 |
| E-10-R      | Tac + MMF | BK Viruria (9/13/2013), cerebrovascular event (8/13/2015)                                                                                       |
| E-13-R      | Tac + MMF | Dyspnea and respiratory abnormalities (8/7/13), UTI (9/5/13, 2/13/14)                                                                           |
| E-14-R      | Tac + MMF | has not been typed for HLA-DP locus, cannot determine DSA class II                                                                              |
| E-16-R      | Tac + MMF | cytomegalovirus disease (11/4/2013) / proteinuria only occurred day of transplant                                                               |
| E-17-R      | Tac + MMF | UTI (8/28/13, 9/18/13, 10/17/13), Bactremia (10/18/13), Abnormal liver function (9/23/13)                                                       |
| E-19-R      | Tac + MMF | BK Nephropathy (11/7/2014) / only proteinuria day after transplant                                                                              |
| E-20-R      | Tac + MMF |                                                                                                                                                 |
| E-21-R      | Tac + MMF | BK Viremia/Viruria (1/14/2014)                                                                                                                  |
| E-24-R      | Tac + MMF | Hematuria (2/13/2014) / 2+ and 3+                                                                                                               |
| E-25-R      | Tac + MMF | UTI (3/12/14, 4/12/2014), acute pyelonephritis (4/13/2014)                                                                                      |
| E-28-R      | Tac + MMF | Neutropenia (2/21/2014)                                                                                                                         |
| E-32-R      | Tac + MMF |                                                                                                                                                 |
| E-38-R      | Tac + MMF | Neutropenia (7/10/2014) / no FK since 2014                                                                                                      |
| E-41-R      | Tac + MMF | UTI (5/27/2014), pyelonephritis (5/29/2014), neutropenia (9/2/2014) / proteinuria 1 week post transplant                                        |
| E-44-R      | Tac + MMF | Enteritis (Norwalk virus) (4/20/2015)                                                                                                           |
| <b>Mean</b> |           |                                                                                                                                                 |
| SD          |           |                                                                                                                                                 |



**Table B: Histopathological Data in Low Dose TAC + EVR vs. TAC + MMF**

| SUBJECT NUMBER | IFTA (in TAC+ EVR Group) |                              |                                                  |                                                            |                   |                   |                                       | Histopathology (in TAC+ EVR Group) |                        |                           |                               |                               |                               |                       |                      |
|----------------|--------------------------|------------------------------|--------------------------------------------------|------------------------------------------------------------|-------------------|-------------------|---------------------------------------|------------------------------------|------------------------|---------------------------|-------------------------------|-------------------------------|-------------------------------|-----------------------|----------------------|
|                | IFTA (ci, ct) Degree/%   | Inflammation assoc with IFTA | Composition of infiltrate (LVM)                  | Tubulitis of intact tubules within/ interface              | TG (cg)           | C4d               | OTHER FINDINGS/DIAGNOSIS              | GS/Total G/SS                      | Acute glomerulitis (g) | Tubulitis NOT in IFTA (t) | ATN/ISO Tubular vacuolation   | Interstitial Inflammation (i) | Hyaline arteriosclerosis (ah) | Arteriosclerosis (cv) | PTC                  |
| E-02-R         | 0%(ci0,ct0)              | None                         | 0                                                | 0                                                          | 0(cg0)            | Neg(C4d:0)        | None                                  | 0/9 - 0/9                          | 0(g0)                  | 0(t0)                     | Moderate /No ISO              | 0(i0)                         | 0(ah0)                        | 0(cv0)                | 0(ptc:0)             |
| E-03-R         | 10% (Mild; ci1,ct1)      | Very mild                    | Lymphocytes, rare macrophages, many plasma cells | Rare mild tubulitis ( 1 tubule)                            | 0(cg0)            | Neg(C4d:0)        | None                                  | 1/41 - 0/41                        | 0(g0)                  | 0(t0)                     | Mild/No ISO                   | 0(i0)                         | 0(ah0)                        | Focal mild (cv1)      | 0(ptc:0)             |
| E-11-R         | 20%(Mild; ci1,ct1)       | Minimal                      | lymphocytes                                      | None                                                       | 0(cg0)            | Neg(C4d:0)        | Very small subcapsular injury         | 0/11 - 0/11                        | 0(g0)                  | 0(t0)                     | Mild/No ISO                   | 0(i0)                         | 0(ah0)                        | 0(cv0)                | 0(ptc:0)             |
| E-15-R         | 5-10%(Mild; ci1, ct1)    | Moderate                     | Many plasma cells, lymphs, few macrophages       | Few Mild (t1)                                              | 0(cg0)            | Neg (C4d:0)       | Borderline change                     | 0/17 - 1/17                        | 0(g0)                  | Moderate (t2)             | Moderate /No ISO              | Mild(i1)                      | 0(ah0)                        | Focal mild (cv1)      | 0(ptc:0)             |
| E-18-R         | 5-10%(Mild; ci1, ct1)    | Focally moderate             | Lymphocytes, some macrophages                    | None                                                       | 0(cg0)            | Neg(C4d:0)        | Subcapsular injury                    | 2/48 - 0/48                        | 0(g0)                  | 0(t0)                     | Mild/No ISO                   | 0(i0)                         | 0(ah0)                        | 0(cv0)                | 0(ptc:0)             |
| E-22-R         | 0%(ci0, ct0)             | None                         | 0                                                | 0                                                          | 0 (cg0)           | Neg(C4d:0)        | Small subcapsular injury              | 0/29 - 0/29                        | 0(g0)                  | 0(t0)                     | Mild/No ISO                   | 0(i0)                         | 0(ah0)                        | 0(cv0)                | 0(ptc:0)             |
| E-23-R         | 5% - 10%(Mild; ci1,ct1)  | Minimal                      | None                                             | None                                                       | 0(cg0)            | Neg(C4d:0)        | None                                  | 0/15 - 0/15                        | 0(g0)                  | 0(t0)                     | Mild/No ISO                   | 0(i0)                         | 0(ah0)                        | 0(cv0)                | 0(ptc:0)             |
| E-26-R         | 0                        | None                         | None                                             | None                                                       | 0(cg0)            | Neg(C4d:0)        | None                                  | 1/35 – 1/35                        | 0(g0)                  | 0(t0)                     | Mild/No ISO                   | 0(i0)                         | 0(ah0)                        | 0(cv0)                | 0(ptc:0)             |
| E-27-R         | 0% (ci0,ct0)             | None                         | None                                             | None                                                       | 0(cg0)            | Neg(C4d:0)        | None                                  | 0/26 – 0/26                        | 0(g0)                  | 0(t0)                     | Mild/No ISO                   | 0(i0)                         | 0(ah0)                        | 0(cv0)                | 0(ptc:0)             |
| E-29-R         | 5% 10%(Mild; ci1-ct1)    | Focal mild                   | Lymphocytes, Few macrophages, rare lymphs        | Few mild tubulitis (t1). Rare moderate t2 in adjacent area | 0(cg0)            | Neg (C4d:0)       | None                                  | 2/60 - 2/60                        | 0(g0)                  | 0(t0)                     | Mild/No ISO                   | 0(i0 - <10%)                  | 0(ah0)                        | 0(cv0)                | 0(ptc:0) <10%        |
| E-30-R         | 5%-10% (Mild; ci1-ct1)   | Minimal                      | Lymphocytes                                      | None                                                       | 0(cg0)            | Neg(C4d:0)        | None                                  | 0/11 - 0/11                        | 0(g0)                  | 0(t0)                     | Mild/1 focus of Isometric vac | 0(i0)                         | 0(ah0)                        | 0(cv0)                | 0(ptc:0)             |
| E-31-R         | 5% (Mild; ci1-ct1)       | Mild, very focal             | Lymphocytes, rare macro                          | Mild(t1)-rare                                              | 0(cg0)            | Neg(C4d:0)        | Moderate arterio-sclerosis            | 1/20 – 1/20                        | 0(g0)                  | Mild(t1)                  | Moderate /No ISO              | 0(i0 - <3%)                   | 0(ah0)                        | Moderate (cv2)        | 0(ptc:0) <10%        |
| E-33-R         | 0                        | None                         | None                                             | None                                                       | 0(cg0)            | Neg(C4d:0)        | None                                  | 0/27 – 0/27                        | 0(g0)                  | 0(t0)                     | Mild/No ISO                   | 0(i0)                         | 0(ah0)                        | 0(cv0)                | 0(ptc:0)             |
| E-34-R         | 0                        | None                         | None                                             | None                                                       | 0cg0              | Neg(C4d:0)        | None                                  | 0/21 – 0/21                        | 0(g0)                  | 0(t0)                     | Moderate/No ISO               | 0(i0)                         | 0(ah0)                        | 0(cv0)                | 0(ptc:0)             |
| E-37-R         | 5% (Mild; ci1-ct1)       | Minimal                      | lymphocytes                                      | None                                                       | 0(cg0)            | Neg(C4d:0)        | None                                  | 1/13 – 0/13                        | 0(g0)                  | 0(t0)                     | Mild/No ISO                   | 0(i0)                         | 0(ah0)                        | Mild(cv1)             | 0(ptc:0)             |
| E-39-R         | 5% (Mild; ci1-ct1)       | Mild                         | Lymphocytes , Many plasma cells                  | None                                                       | 0(cg0)            | Neg(C4d:0)        | Small subcapsular injury              | 1/15 – 1/15                        | 0(g0)                  | 0(t0)                     | Mild/No ISO                   | 0(i0)                         | 0(ah0)                        | Mild(cv1)             | 0(ptc:0)             |
| E-40-R         | <5%(Mild)                | None                         | None                                             | None                                                       | 0(cg0)            | Neg(C4d:0)        | None                                  | 0/15 – 0/15                        | 0(g0)                  | 0(t0)                     | Mild/No ISO                   | 0(i0)                         | 0(ah0)                        | Mild(cv1)             | 0(ptc:0)             |
| E-42-R         | 40%(Moderate; ci2,ct2)   | Mild - Moderate              | Lymphocytes, some macrophages                    | Mild )t1)                                                  | 0(cg0)            | Neg(C4d:0)        | None                                  | 3/41 – 0/41                        | 0(cg0)                 | 0(t0)                     | Mild/No ISO                   | 0(i0)                         | 1(ah1)                        | 0(cv0)                | 0(ptc:0)             |
| E-43-R         | 10%-20% (Mild; ci1,ct1)  | Focally mild                 | Lymphocytes                                      | Some mild (t1) and moderate (t2) tubulitis                 | 0(cg0)            | Neg(C4d:0)        | Borderline change; Subcapsular injury | 0/31 – 0/31                        | 0(g0)                  | Focal moderate (t2)       | Moderate/No ISO               | 0(i0)                         | 0(ah0)                        | 0(cv0)                | 0(ptc:0)             |
| <b>TOTAL</b>   | 19                       |                              |                                                  |                                                            |                   |                   |                                       | 19                                 |                        |                           |                               |                               |                               |                       |                      |
|                | None: 5/19 (26%)         | None: 7/19 (37%)             |                                                  | t0: 13/19 (68%)                                            | cg0: 19/19 (100%) | cd0: 19/19 (100%) | Borderline change:2/17 (12%)          | GS: 8/19 (42%)                     | g0: 19/19 (100%)       | t0: 16/19 (84%)           | None: 0/19 (0%)               | i0: 18/19 (95%)               | ah0: 18/19 (95%)              | cv0: 13/19 (69%)      | 9ptc:0: 17/19 (100%) |
|                | Mild: 12/19 (63%)        | Minimal: 4/19 (21%)          |                                                  | t1: 4/19 (21%)                                             | cg1: 0/19 (0%)    | C4d1: 0/19 (0%)   | Subcapsular injury: 5/17 (30%)        | FGS: 5/19 (26%)                    | g1: 0/19 (0%)          | t1: 1/19 (5%)             | Mild: 14/19 (74%)             | i1: 1/19 (5%)                 | ah1: 1/19 (5%)                | cv1: 5/19 (26%)       | 9ptc1: 0/17 (0%)     |
|                | Moderate: 1/19 (5%)      | Mild: 5/19 (26%)             |                                                  | t2: 2/19 (11%)                                             | cg2: 0/19 (0%)    | C4d2: 0/19 (0%)   |                                       |                                    | g2: 0/19 (0%)          | t2: 2/17 (11%)            | Moderate: 5/19 (26%)          | i2: 0/19 (0%)                 | ah2: 0/19 (0%)                | cv2: 1/19 (5%)        | 7ptc2: 0/17 (0%)     |
|                | Severe: 0/19 (0%)        | Moderate: 3/19 (16%)         |                                                  | t3: 0/19 (0%)                                              | cg3: 0/19 (0%)    | C4d3: 0/19 (0%)   |                                       |                                    | g3: 0/19 (0%)          | t3: 0/19 (0%)             | Severe: 0/19 (0%)             | i3: 0/19 (0%)                 | ah3: 0/19 (0%)                | cv3: 0/19(0%)         | ptc3: 0/19 (0%)      |
|                |                          | Severe: 0/19 (0%)            |                                                  |                                                            |                   |                   |                                       |                                    |                        |                           | ISO: 1/19 (5%)                |                               |                               |                       |                      |

**Table B: Histopathological Data in Low Dose TAC + EVR vs. TAC + MMF**

| SUBJECT NUMBER | IFTA (in TAC+ MMF Group)              |                                        |                                                   |                                                                       |                                                                        |                                                                             |                                                                                                                | Histopathology (in TAC+ MMF Group) |                                                                     |                                                                     |                                                           |                                                                     |                                                                        |                                                                         |                                                                              |
|----------------|---------------------------------------|----------------------------------------|---------------------------------------------------|-----------------------------------------------------------------------|------------------------------------------------------------------------|-----------------------------------------------------------------------------|----------------------------------------------------------------------------------------------------------------|------------------------------------|---------------------------------------------------------------------|---------------------------------------------------------------------|-----------------------------------------------------------|---------------------------------------------------------------------|------------------------------------------------------------------------|-------------------------------------------------------------------------|------------------------------------------------------------------------------|
|                | IFTA (ci, ct) Degree/%                | Inflammation assoc with IFTA           | Composition of infiltrate (LW)                    | Tubulitis of intact tubules within/interface                          | TG (cg)                                                                | C4d                                                                         | OTHER FINDINGS / DIAGNOSIS                                                                                     | GS/Total G/SS                      | Acute glomerulitis (g)                                              | Tubulitis NOT in IFTA (t)                                           | ATN/ISO Tubular vacuolation                               | Interstitial Inflammation (i)                                       | Hyaline arteriosclerosis (ah)                                          | Arteriosclerosis (cv)                                                   | PTC                                                                          |
| E-04-R         | Mild (<5%; ci0,ct0)                   | mild                                   | Lymphocytes, rare plasma cells, few macrophages   | Mild tubulitis (t1) in 2 - 3 tubules                                  | 0(cg0)                                                                 | Neg(C4d:0)                                                                  | Borderline change (g0,i0,t1, v0)                                                                               | 0/16 – 1/16                        | 0 (g0)                                                              | Focal mild (t1)                                                     | None                                                      | <10% (i0)                                                           | 0 (ah0)                                                                | 0 (cv0)                                                                 | 0 (ptc:0)                                                                    |
| E-05-R         | 0                                     | None                                   | None                                              | None                                                                  | 0(cg0)                                                                 | Neg(C4d:0)                                                                  | -----                                                                                                          | 0/19 – 0/19                        | 0 (g0)                                                              | 0(t0)                                                               | Mild / No ISO                                             | 0 (i0)                                                              | 0(ah0)                                                                 | 0(cv0)                                                                  | 0(ptc:0)                                                                     |
| E-06-R         | Mild (<5%; ci0,ct1)                   | None                                   | None                                              | None                                                                  | 0(cg0)                                                                 | Mod-severe (4+) Linear (C4d:3)                                              | Antibody-mediated rejection (Grade 1)                                                                          | 0/35 – 0/35                        | 1 (g1)                                                              | 0(t0)                                                               | Moderate/No ISO                                           | 0(i0)                                                               | 0(ah0)                                                                 | 0(cv0)                                                                  | focal (ptc:1)                                                                |
| E-07-R         | 0                                     | None                                   | None                                              | None                                                                  | 0(cg0)                                                                 | Neg(C4d:0)                                                                  | -----                                                                                                          | 0/16 – 0/16                        | 0(cg0)                                                              | 0(t0)                                                               | Mild/No ISO                                               | 0(i0)                                                               | 0(ah0)                                                                 | 0(ah0)                                                                  | 0(ptc:0)                                                                     |
| E-09-R         | Mild (5% - 10%; ci1,ct1)              | Focal,mild                             | Some lymphocytes                                  | Rare t1(2)                                                            | 0(cg0)                                                                 | Neg(C4d:0)                                                                  | Subcapsular injury                                                                                             | 0/20 – 0/20                        | 0(g0)                                                               | 0(t0)                                                               | None                                                      | 0(i0)                                                               | focal 1(ah1)                                                           | 0(cv0)                                                                  | 0(ptc:0)                                                                     |
| E-10-R         | Moderate(30% - 40%; ci2, ct2)         | Moderate (25% - 50%)                   | Lymphocytes, rare plasma cell, rare macrophages   | Some Mild (t1) and rare moderate (t2)                                 | 0(cg0)                                                                 | 2+, diffuse, Linear (C4d3)                                                  | Suspicious for antibody-mediated rejection                                                                     | 0/15 – 0/15                        | 1(suspicious g1)                                                    | Mild (t1)                                                           | None                                                      | 0(i0)                                                               | 0(ah0)                                                                 | 0(cv0)                                                                  | 2 (ptc:2) diffuse                                                            |
| E-13-R         | Mild(<5%; ci0,ct1)                    | None                                   | None                                              | None                                                                  | 0(cg0)                                                                 | Neg(C4d:0)                                                                  | -----                                                                                                          | 0/36 – 0/36                        | 0(g0)                                                               | 0(t0)                                                               | Mild                                                      | 0(i0)                                                               | 0(ah0)                                                                 | Mild(cv1)                                                               | 0(ptc:0)                                                                     |
| E-14-R         | Mild (10%-20%)                        | Focal mild                             | Lymphocytes                                       | Mild tubulitis (1-2 tubules)                                          | 0(cg0)                                                                 | Neg(C4d:0)                                                                  | -----                                                                                                          | 1/14 – 1/14                        | 0(g0)                                                               | 0(t0)                                                               | None                                                      | 0(i0)                                                               | 0(ah0)                                                                 | Focal mild (cv1)                                                        | 0(ptc:0)                                                                     |
| E-16-R         | Mild(5%-10%; Ci1,ct1)                 | None                                   | None                                              | None                                                                  | 0(cg0)                                                                 | 4+, diffuse, Linear (C4d:3)                                                 | Borderline change (g0, i1, t1, v0) AMR                                                                         | 1/34 – 1/34                        | 0(g0)                                                               | Focal mild (t1)                                                     | Mild                                                      | 10%(i1) Some plasma cells                                           | 0(ah0)                                                                 | Focal mild (cv1)                                                        | 2(ptc:2) diffuse                                                             |
| E-17-R         | No record                             | -----                                  | -----                                             | -----                                                                 | -----                                                                  | -----                                                                       | -----                                                                                                          |                                    |                                                                     |                                                                     |                                                           |                                                                     |                                                                        |                                                                         |                                                                              |
| E-19-R         | Mild(<5%; ci0,ct1)                    | None                                   | None                                              | None                                                                  | 0(cg0)                                                                 | Neg(C4d:0)                                                                  | Polyoma Virus Nephropathy Class B1                                                                             | 0/19 – 0/19                        | 0(g0)                                                               | Mild - moderate (t1 – t2)                                           | Mild/No ISO                                               | 10% - 20%                                                           | 0(ah0)                                                                 | 0(cv0)                                                                  | focal 1(ptc:1)                                                               |
| E-21-R         | Mild(<5%; ci0,ct1)                    | Focally moderate                       | Mostly lymphs; Few macrophages, Some Plasma cells | None?                                                                 | 0(cg0)                                                                 | Neg(C4d:0)                                                                  | -----                                                                                                          | 1/15 – 1/15                        | 0(g0)                                                               | 0(t0)                                                               | Mild/No ISO                                               | 0(i0)                                                               | 0(ah0)                                                                 | 0(cv0)                                                                  | ptc:0                                                                        |
| E-24-R         | No Record                             |                                        |                                                   |                                                                       |                                                                        |                                                                             |                                                                                                                |                                    |                                                                     |                                                                     |                                                           |                                                                     |                                                                        |                                                                         |                                                                              |
| E-25-R         | Mild (<5%)                            | mild                                   | Lymphocytes, rare macrophages                     | None                                                                  | 0(cg0)                                                                 | Neg(C4d:0)                                                                  | -----                                                                                                          | 1/18 – 0/18                        | 0(g0)                                                               | 0(t0)                                                               | Mild/No ISO                                               | 0(i0)                                                               | 0(ah0)                                                                 | 0(cv0)                                                                  | ptc:0                                                                        |
| E-28-R         | Mild(5%-10%; ci1, ct1)                | Mild - moderate                        | Lymphs, few                                       | None                                                                  | 0(cg0)                                                                 | 2+, mild-moderate (C4d:3)                                                   | Possible antibody-mediated                                                                                     | 1/15 – 1/15                        | 0(g0)?                                                              | 0(t0)                                                               | Mild/No ISO                                               | 0(i0) 2 small foci of mild-mononuclear + some monocytoïd cells      | 0(ah0)                                                                 | 0(cv0)                                                                  | 1(ptc:1) (75% of ptc)                                                        |
| E-32-R         | 0                                     | None                                   | None                                              | None                                                                  | 0(cg0)                                                                 | Neg(C4d:0)                                                                  | -----                                                                                                          | 0/15 – 0/15                        | 0(g0)                                                               | 0(t0)                                                               | No ATN/No ISO                                             | 0(i0)                                                               | 0(ah0)                                                                 | 0(cv0)                                                                  | ptc:0                                                                        |
| E-38-R         | No Record                             |                                        |                                                   |                                                                       |                                                                        |                                                                             |                                                                                                                |                                    |                                                                     |                                                                     |                                                           |                                                                     |                                                                        |                                                                         |                                                                              |
| E-41-R         | Mild(5%-10%) ci1, ct1                 | minimal                                | Few scattered lymphocytes                         | None                                                                  | 0(cg0)                                                                 | Negative(C4d:0)                                                             | Small Subcapsular injury RBC and RBC casts in tubules                                                          | 0/11 – 0/11                        | 0(g0)                                                               | 0(t0)                                                               | No ATN/No ISO                                             | 0(i0)                                                               | 0(ah0)                                                                 | Mild(cv1)                                                               | ptc:0                                                                        |
| E-44-R         | 0                                     | None                                   | None                                              | None                                                                  | 0(cg0)                                                                 | Negative(C4d:0)                                                             | -----                                                                                                          | 0/27 – 0/27                        | 0(g0)                                                               | 0(t0)                                                               | Mild/NO ISO                                               | 0(i0)                                                               | 0(ah0)                                                                 | 0(cv0)                                                                  | ptc:0                                                                        |
| <b>TOTAL</b>   | 16                                    |                                        |                                                   |                                                                       |                                                                        |                                                                             |                                                                                                                | 16                                 |                                                                     |                                                                     |                                                           |                                                                     |                                                                        |                                                                         |                                                                              |
|                | None: 4/16 (25%)<br>Mild: 11/16 (69%) | None: 8/16 (50%)<br>Minimal: 1/16 (6%) |                                                   | None: 12/16 (75%)<br>t1: 3/16 (19%)<br>t2: 1/16 (6%)<br>t3: 0/15 (0%) | cg0: 16/16 (100%)<br>cg1:0/16 (0%)<br>cg2: 0/16 (0%)<br>cg3: 0/16 (0%) | C4d0: 12/16 (75%)<br>C4d1: 0/16 (0%)<br>C4d2: 0/16 (0%)<br>C4d3: 4/16 (25%) | Borderline change: 2/15 (13%)<br>Subcapsular injury: 2/15 (13%)<br>Polyoma Virus: 1/15 (7%)<br>AMR: 4/15 (27%) | GS: 5/15 (33%)<br>FGS: 4/15 (27%)  | g0: 14/16 (94%)<br>g1: 2/16 (13%)<br>g2: 0/16 (0%)<br>g3: 0/16 (0%) | t0: 12/16 (75%)<br>t1: 2/16 (13%)<br>t2: 1/16 (6%)<br>t3: 0/15 (0%) | None: 5/16 (31%)<br>Mild: 9/16 (56%)<br>Severe: 0/15 (0%) | i0: 14/16 (88%)<br>i1: 2/16 (12%)<br>i2: 0/15 (0%)<br>i3: 0/15 (0%) | ah0: 15/16 (94%)<br>ah1: 1/16 (6%)<br>ah2: 0/16 (0%)<br>ah3: 0/16 (0%) | cv0: 12/16 (75%)<br>cv1: 4/16 (25%)<br>cv2: 0/16 (0%)<br>cv3: 0/16 (0%) | ptc0: 11/16 (69%)<br>ptc1: 3/16 (19%)<br>ptc2: 2/16 (12%)<br>ptc3: 0/15 (0%) |
