# Supplementary material for: Mechanistic analyses in kidney transplant recipients prospectively randomized to two steroid free regimen—Low dose Tacrolimus with Everolimus versus standard dose Tacrolimus with Mycophenolate Mofetil
Source: PubMed Central journal article supplement (PMC6538151; doi:10.1371/journal.pone.0216300), 2019-05-28
Supplement: pone.0216300.s005.pdf [file pone.0216300.s005.pdf]

Tables C-F: Flow Data Tables for Figures 4 and 5

| Table C showing data presented in Fig 4 on the percentage of CD4 <sup>+</sup> CD25 <sup>hi</sup> FOXP3 <sup>+</sup> regulatory T cells in the peripheral blood between study groups |             |             |             |             |             |             |
|-------------------------------------------------------------------------------------------------------------------------------------------------------------------------------------|-------------|-------------|-------------|-------------|-------------|-------------|
|                                                                                                                                                                                     | TAC+EVR     |             |             | TAC+MMF     |             |             |
|                                                                                                                                                                                     | Baseline    | 3mo         | 12mo        | Baseline    | 3mo         | 12mo        |
| 1                                                                                                                                                                                   | 1.51        | 0.94        | 2.65        | 0.74        | 0.46        | 0.45        |
| 2                                                                                                                                                                                   | 0.87        | 0.61        | 1.14        | 1           | 0.47        | 1.12        |
| 3                                                                                                                                                                                   | 0.66        | 0.71        | 0.94        | 1.1         | 1.82        | 0.9         |
| 4                                                                                                                                                                                   | 1.3         | 1.6         | 0.96        | 1.34        | 0.92        | 1.11        |
| 5                                                                                                                                                                                   | 0.67        | 1.15        | 0.98        | 0.75        | 0.4         | 0.46        |
| 6                                                                                                                                                                                   | 0.51        | 1.54        | 1.38        | 0.94        | 0.51        | 0.83        |
| 7                                                                                                                                                                                   | 0.43        | 1.86        | 1.11        | 2.72        | 0.4         | 0.65        |
| 8                                                                                                                                                                                   | 0.34        | 0.61        | 1.26        | 0.59        | 1.43        | 1.55        |
| 9                                                                                                                                                                                   | 0.68        | 0.5         | 1.54        | 1.34        |             | 1.01        |
| 10                                                                                                                                                                                  | 0.53        | 1.17        | 0.88        | 0.21        |             | 0.44        |
| 11                                                                                                                                                                                  | 1.04        | 1.71        | 1.3         | 1.14        |             | 0.86        |
| 12                                                                                                                                                                                  | 0.92        | 0.54        | 1.33        | 0.48        |             | 0.38        |
| 13                                                                                                                                                                                  | 1.14        | 1.62        | 0.45        | 1.33        |             |             |
| 14                                                                                                                                                                                  | 2.32        | 1.13        | 1.18        |             |             |             |
| 15                                                                                                                                                                                  | 1.03        |             | 0.59        |             |             |             |
| <b>Mean</b>                                                                                                                                                                         | <b>0.93</b> | <b>1.12</b> | <b>1.18</b> | <b>1.05</b> | <b>0.80</b> | <b>0.81</b> |
| SE                                                                                                                                                                                  | 0.13        | 0.13        | 0.13        | 0.17        | 0.19        | 0.10        |

| Table D showing data presented in Fig 5 (top) on the percentage of IFN- $\gamma$ <sup>+</sup> regulatory T cells in the peripheral blood between study groups (% of CD4 <sup>+</sup> CD25 <sup>hi</sup> FOXP3 <sup>+</sup> cells) |             |             |             |              |              |             |
|-----------------------------------------------------------------------------------------------------------------------------------------------------------------------------------------------------------------------------------|-------------|-------------|-------------|--------------|--------------|-------------|
|                                                                                                                                                                                                                                   | TAC+EVR     |             |             | TAC+MMF      |              |             |
|                                                                                                                                                                                                                                   | Baseline    | 3mo         | 12mo        | Baseline     | 3mo          | 12mo        |
| 1                                                                                                                                                                                                                                 | 50          | 6.87        | 19.7        | 31.3         | 2.03         | 17.6        |
| 2                                                                                                                                                                                                                                 | 18.2        | 14.3        | 21          | 46.5         | 42           | 3.33        |
| 3                                                                                                                                                                                                                                 | 6.21        | 17.4        | 46.4        | 18.7         | 10.9         | 5.86        |
| 4                                                                                                                                                                                                                                 | 10.7        | 13          | 22.2        | 18.5         | 43.2         | 6.35        |
| 5                                                                                                                                                                                                                                 | 30.9        | 50          | 31.4        | 41.3         | 0            | 9.26        |
| 6                                                                                                                                                                                                                                 | 27.4        | 29.8        | 23.3        | 17.9         | 10.8         | 7.89        |
| 7                                                                                                                                                                                                                                 | 15.1        | 67.1        | 17.3        | 12           | 21.6         | 14.9        |
| 8                                                                                                                                                                                                                                 | 21.1        | 10.4        | 26.5        | 6.03         | 7.09         | 3.4         |
| 9                                                                                                                                                                                                                                 | 46.2        | 25.8        | 21.4        | 7.27         | 0.98         | 9.96        |
| 10                                                                                                                                                                                                                                | 50          | 21.4        | 25          | 37.7         |              | 11.4        |
| 11                                                                                                                                                                                                                                | 52.9        | 7.25        | 21.9        | 4.15         |              | 8.04        |
| 12                                                                                                                                                                                                                                | 9.63        | 38.5        | 15.9        | 5.03         |              | 9.55        |
| 13                                                                                                                                                                                                                                | 4.18        | 5.35        | 22.1        | 3.73         |              |             |
| 14                                                                                                                                                                                                                                | 8.29        | 0.88        | 23.6        |              |              |             |
| 15                                                                                                                                                                                                                                | 0           |             | 16.6        |              |              |             |
| <b>Mean</b>                                                                                                                                                                                                                       | <b>23.4</b> | <b>22.0</b> | <b>23.6</b> | <b>19.24</b> | <b>15.40</b> | <b>8.96</b> |
| SE                                                                                                                                                                                                                                | 4.8         | 5.0         | 1.9         | 4.21         | 5.93         | 1.23        |

Tables C-F: Flow Data Tables for Figures 4 and 5

**Table E showing data presented in Fig 5 (middle) on the percentage of IL17<sup>+</sup> regulatory T cells in the peripheral blood between study groups (% of CD4<sup>+</sup>CD25<sup>hi</sup>FOXP3<sup>+</sup> cells)**

|             | TAC+EVR         |             |             | TAC+MMF         |             |             |
|-------------|-----------------|-------------|-------------|-----------------|-------------|-------------|
|             | <i>Baseline</i> | <i>3mo</i>  | <i>12mo</i> | <i>Baseline</i> | <i>3mo</i>  | <i>12mo</i> |
| 1           | 0               | 2.06        | 0.33        | 0               | 0           | 0           |
| 2           | 0               | 2.86        | 1.12        | 0               | 1           | 0           |
| 3           | 0               | 0           | 0           | 0.51            | 0           | 0           |
| 4           | 0.51            | 0.63        | 0.83        | 0               | 0.24        | 0.32        |
| 5           | 0               | 0.61        | 0           | 0               | 0           | 0           |
| 6           | 0               | 0           | 0.79        | 0.51            | 0           | 0           |
| 7           | 0               | 0.26        | 0           | 0.21            | 0           | 0           |
| 8           | 0               | 0           | 0           | 0               | 0           | 1.02        |
| 9           | 0               | 0           | 0           | 0               | 0           | 0.41        |
| 10          | 0               | 0           | 0           | 0               |             | 0           |
| 11          | 0               | 0.57        | 0           | 0               |             | 0           |
| 12          | 0               | 0           | 0.29        | 0               |             | 0.32        |
| 13          | 0               | 0           | 0           | 0               |             |             |
| 14          | 0.32            | 0.44        | 0           |                 |             |             |
| 15          | 0               |             | 0           |                 |             |             |
| <b>Mean</b> | <b>0.06</b>     | <b>0.53</b> | <b>0.22</b> | <b>0.09</b>     | <b>0.14</b> | <b>0.17</b> |
| SE          | 0.04            | 0.23        | 0.10        | 0.05            | 0.12        | 0.09        |

**Table F showing data presented in Fig 5 (bottom) on the percentage of RORγt<sup>+</sup> regulatory T cells in the peripheral blood between study groups (% of CD4<sup>+</sup>CD25<sup>hi</sup>FOXP3<sup>+</sup> cells)**

|             | TAC+EVR         |             |             | TAC+MMF         |             |              |
|-------------|-----------------|-------------|-------------|-----------------|-------------|--------------|
|             | <i>Baseline</i> | <i>3mo</i>  | <i>12mo</i> | <i>Baseline</i> | <i>3mo</i>  | <i>12mo</i>  |
| 1           | 50              | 0.69        | 0.16        | 22.3            | 1.01        | 0.35         |
| 2           | 6.25            | 0.57        | 0.75        | 2.19            | 2           | 41.2         |
| 3           | 3.45            | 3.72        | 0.75        | 2.02            | 2.56        | 27.1         |
| 4           | 1.02            | 0.42        | 1.11        | 0.34            | 12          | 27.6         |
| 5           | 7.45            | 19.3        | 50.5        | 0.6             | 0           | 6.79         |
| 6           | 0               | 5.32        | 34          | 18.9            | 19.8        | 7.89         |
| 7           | 0               | 37.3        | 23.4        | 48.3            | 14.9        | 6.97         |
| 8           | 0               | 2.89        | 29.6        | 7.91            | 9.93        | 6.12         |
| 9           | 4.14            | 7.28        | 50.3        | 7.88            | 10.1        | 5.81         |
| 10          | 55.3            | 40.5        | 21          | 6.49            |             | 3.96         |
| 11          | 76.5            | 29.2        | 33.5        | 9.73            |             | 3.57         |
| 12          | 47.8            | 52.6        | 3.47        | 3.14            |             | 3.82         |
| 13          | 36.8            | 16.9        | 3.54        | 6.22            |             |              |
| 14          | 47.5            | 2.21        | 3.11        |                 |             |              |
| 15          | 3.26            |             | 2.29        |                 |             |              |
| <b>Mean</b> | <b>22.6</b>     | <b>15.6</b> | <b>17.2</b> | <b>10.46</b>    | <b>8.03</b> | <b>11.77</b> |
| SE          | 6.8             | 4.7         | 4.8         | 3.65            | 2.47        | 3.70         |

Table G: Gene Functions Data Shown in Figure 6

Figure 6 - Gene Functions

| Categories                                                                            | Diseases or Functions Annotation          | p-value    | Predicted Activation State | Activation z-score |                                                                                                                                                                                                                                                                                                                             | Molecules # | Molecules |
|---------------------------------------------------------------------------------------|-------------------------------------------|------------|----------------------------|--------------------|-----------------------------------------------------------------------------------------------------------------------------------------------------------------------------------------------------------------------------------------------------------------------------------------------------------------------------|-------------|-----------|
| Cellular Movement                                                                     | migration of cells                        | 9.08E-11   | Decreased                  | -2.004             | ABHD6,ADAM10,ADGRL3,ANGPT2,C4A/C4B,CALCRL,CALU,CEACAM1,CHN2,CLIC4,CPNE3,CXCL12,CXCR4,DPT,EDIL3,EDNRA,EFS,FERMT1,FHL1,FLT1,HNRNPL,IQGAP1,ITGB1BP1,JAG1,KCNMA1,LEPR,LYVE1,MAGI1,MCAM,NCOA2,PATJ,PCM1,PDCD4,PDCD6,PDE4DIP,PGGT1B,PROX1,RAPGEF3,S100A4,SEMA6A,SMAD5,SRPX2,STK4,TCF7L2,TG,TGFB2,THBS1,TM4SF1,TNC,VDR,VLDLR,WNT5A | 52          |           |
| Cellular Movement                                                                     | migration of cancer cells                 | 1.59E-10   | Decreased                  | -2.139             | ADAM10,ANGPT2,CEACAM1,CXCL12,CXCR4,FLT1,IQGAP1,MCAM,PROX1,RAPGEF3,TGFB2,THBS1,TM4SF1,TNC,WNT5A                                                                                                                                                                                                                              | 15          |           |
| Cellular Movement                                                                     | cell movement of tumor cells              | 8.28E-10   | Decreased                  | -2.12              | ADAM10,ANGPT2,CEACAM1,CXCL12,CXCR4,FLT1,IQGAP1,MCAM,RAPGEF3,TGFB2,THBS1,TM4SF1,TNC,WNT5A                                                                                                                                                                                                                                    | 14          |           |
| Tissue Morphology                                                                     | quantity of cells                         | 3.97E-09   | Decreased                  | -3.504             | ADAM10,ANGPT2,ATRX,C4A/C4B,CALCR,CALCRL,CLIC4,CREB1,CXCL12,CXCR4,DLK1,EDNRA,EIF2S1,ELF1,ENTPD1,FHL5,FLT1,HSF2,ITGB1BP1,JAG1,KIF13A,LEPR,MECOM,MLXIPL,NCOA2,NEFH,NFASC,PDCD6,PLCL2,PTGER2,RAPGEF3,SMAD5,SSBP2,STK4,TANK,TCF7L2,TFRC,TG,TGFB2,THBS1,TNC,UTRN,VDR,VLDLR,WNT5A,ZFX                                              | 46          |           |
| Organ Morphology, Reproductive System Development and Function                        | quantity of gonad                         | 4.95E-08   | Decreased                  | -2.18              | CXCL12,CXCR4,ENTPD1,FHL5,FLT1,HSF2,LEPR,PTGER2,SMAD5,TGFB2,VDR,WNT5A,ZFX                                                                                                                                                                                                                                                    | 13          |           |
| Cell-To-Cell Signaling and Interaction, Cellular Assembly and Organization            | cell-cell contact                         | 0.00000111 | Decreased                  | -2.692             | ADAM10,ADGRL3,ANGPT2,CEACAM1,CREB1,CXCL12,CXCR4,ENTPD1,GABPA,HNF1B,IQGAP1,MBNL1,MBNL2,MCAM,NFASC,RAPGEF3,SRPX2,THBS1,TNC,UTRN,WNT5A                                                                                                                                                                                         | 21          |           |
| Embryonic Development, Organismal Development                                         | development of body trunk                 | 0.0000038  | Decreased                  | -2.006             | ADAM10,CALCRL,CREB1,CXCL12,CXCR4,EDNRA,EMP1,FHL1,FILIP1L,FLT1,GABPA,HNF1B,ID4,JAG1,LEPR,LTBP1,MECOM,NCOA2,PDCD4,PROX1,PTGER2,RAPGEF3,SMAD5,STK4,TCF7L2,TGFB2,THBS1,UTRN,VDR,WNT5A,ZFX                                                                                                                                       | 31          |           |
| Organismal Development                                                                | development of genitourinary system       | 0.0000258  | Decreased                  | -2.176             | ATRX,CREB1,CXCL12,CXCR4,EDNRA,FHL5,FLT1,GRB10,HNF1B,HSF2,ID4,JAG1,LEPR,MLXIPL,NCOA2,NUPR1,PTGER2,RAPGEF3,SMAD5,STK4,TGFB2,VDR,VLDLR,WNT5A,ZFX                                                                                                                                                                               | 25          |           |
| Cellular Movement                                                                     | cell movement of breast cancer cell lines | 0.0000428  | Decreased                  | -2.035             | ANGPT2,CHN2,CPNE3,CXCL12,CXCR4,IQGAP1,MCAM,PDCD4,S100A4,SENP7,SMAD5,WNT5A                                                                                                                                                                                                                                                   | 12          |           |
| Inflammatory Response                                                                 | inflammatory response                     | 0.0000545  | Decreased                  | -2.488             | ADAM10,ANGPT2,CALCRL,CXCL12,CXCR4,CYP4F3,EDNRA,EFS,FLT1,LTBP1,MECOM,NR1D2,NUPR1,PDCD4,PTGER2,RAPGEF3,S100A4,TGFB2,THBS1,TNC,WNT5A                                                                                                                                                                                           | 21          |           |
| Cellular Movement, Immune Cell Trafficking, Lymphoid Tissue Structure and Development | chemotaxis of lymphatic system cells      | 0.000129   | Decreased                  | -2.543             | ADAM10,CXCL12,CXCR4,PROX1,S100A4,THBS1,WNT5A                                                                                                                                                                                                                                                                                | 7           |           |

Table G: Gene Functions Data Shown in Figure 6

|                                                                                                                                                                                            |                                          |          |           |        |                                                                                                                                                                                                                                                                                                                                                                                                                 |    |
|--------------------------------------------------------------------------------------------------------------------------------------------------------------------------------------------|------------------------------------------|----------|-----------|--------|-----------------------------------------------------------------------------------------------------------------------------------------------------------------------------------------------------------------------------------------------------------------------------------------------------------------------------------------------------------------------------------------------------------------|----|
| Cell-mediated Immune Response, Cellular Movement, Hematological System Development and Function, Immune Cell Trafficking, Inflammatory Response, Lymphoid Tissue Structure and Development | chemotaxis of T lymphocytes              | 0.000154 | Decreased | -2.366 | ADAM10, CXCL12, CXCR4, S100A4, THBS1, WNT5A                                                                                                                                                                                                                                                                                                                                                                     | 6  |
| Gene Expression                                                                                                                                                                            | transcription                            | 0.000205 | Decreased | -2.659 | ATRX, C4A/C4B, CPE, CREB1, CXCR4, EIF2S1, ELF1, FERMT1, FHL5, GABPA, HNF1B, HSF2, ID4, IQGAP1, ITGB1BP1, JAG1, LEPR, MDFIC, MECOM, MLXIPL, NANOG, NCOA2, NR1D2, PDCD4, PROX1, PTGER2, RAPGEF3, SMAD5, STK4, TANK, TCF7L2, TG, TGFB2, TNC, VDR, VLDLR, WNT5A, ZNF711                                                                                                                                             | 38 |
| Cellular Movement, Hematological System Development and Function, Immune Cell Trafficking, Inflammatory Response                                                                           | chemotaxis of mononuclear leukocytes     | 0.000207 | Decreased | -2.175 | ADAM10, ANGPT2, CXCL12, CXCR4, FLT1, S100A4, THBS1, WNT5A                                                                                                                                                                                                                                                                                                                                                       | 8  |
| Cell-To-Cell Signaling and Interaction                                                                                                                                                     | binding of blood cells                   | 0.000244 | Decreased | -2.021 | ADAM10, ANGPT2, C4A/C4B, CEACAM1, CXCL12, CXCR4, ENTPD1, FLT1, MCAM, STK4, TFRC, THBS1, TNC                                                                                                                                                                                                                                                                                                                     | 13 |
| Connective Tissue Development and Function, Tissue Development                                                                                                                             | growth of connective tissue              | 0.000268 | Decreased | -2.187 | CEACAM1, CREB1, CXCL12, EDNRA, FERMT1, FLT1, GRB10, KCNMA1, LEPR, MECOM, NUPR1, PGGT1B, PTGER2, SMAD5, TGFB2, VDR, WNT5A                                                                                                                                                                                                                                                                                        | 17 |
| Cell-To-Cell Signaling and Interaction                                                                                                                                                     | adhesion of blood cells                  | 0.000271 | Decreased | -2.607 | ADAM10, ANGPT2, C4A/C4B, CEACAM1, CXCL12, CXCR4, ENTPD1, FLT1, MCAM, STK4, THBS1, TNC                                                                                                                                                                                                                                                                                                                           | 12 |
| Cellular Development, Cellular Growth and Proliferation, Nervous System Development and Function, Tissue Development                                                                       | proliferation of neuronal cells          | 0.000372 | Decreased | -2.193 | ADAM10, CREB1, CXCL12, CXCR4, FLT1, ID4, IQGAP1, JAG1, NEFH, S100A4, SEMA6A, THBS1, TNC, VLDLR, WNT5A                                                                                                                                                                                                                                                                                                           | 15 |
| Gene Expression                                                                                                                                                                            | expression of RNA                        | 0.00041  | Decreased | -2.817 | ATRX, CALCR, CPE, CREB1, CXCR4, EIF2S1, ELF1, FERMT1, FHL5, GABPA, HNF1B, HSF2, ID4, IQGAP1, ITGB1BP1, JAG1, LEPR, MAP4K5, MDFIC, MECOM, MLXIPL, NANOG, NCOA2, NR1D2, PDCD4, PROX1, PTGER2, RAPGEF3, SMAD5, STK4, TANK, TCF7L2, TG, TGFB2, TNC, VDR, VLDLR, WNT5A, ZNF711                                                                                                                                       | 39 |
| Gene Expression                                                                                                                                                                            | transcription of RNA                     | 0.000432 | Decreased | -2.119 | ATRX, CPE, CREB1, CXCR4, EIF2S1, ELF1, FHL5, GABPA, HNF1B, HSF2, ID4, IQGAP1, ITGB1BP1, JAG1, LEPR, MDFIC, MECOM, MLXIPL, NANOG, NCOA2, NR1D2, PDCD4, PROX1, PTGER2, RAPGEF3, SMAD5, STK4, TANK, TCF7L2, TG, VDR, VLDLR, WNT5A, ZNF711                                                                                                                                                                          | 34 |
| Reproductive System Development and Function                                                                                                                                               | fertility                                | 0.000644 | Decreased | -2.401 | CLIC4, CPE, ENTPD1, FHL5, LEPR, NCOA2, PTGER2, SMAD5, THBS1, VDR, ZFX                                                                                                                                                                                                                                                                                                                                           | 11 |
| Cellular Development, Cellular Growth and Proliferation, Nervous System Development and Function, Tissue Development                                                                       | growth of neurites                       | 0.00073  | Decreased | -2.063 | ADAM10, CREB1, CXCL12, CXCR4, FLT1, IQGAP1, NEFH, S100A4, SEMA6A, THBS1, TNC, VLDLR, WNT5A                                                                                                                                                                                                                                                                                                                      | 13 |
| Organismal Survival                                                                                                                                                                        | organismal death                         | 3.36E-09 | Increased | 2.194  | ABCC9, ADAM10, ADAMTS9, ANGPT2, C4A/C4B, CALCR, CALCRL, CEACAM1, CLIC4, CREB1, CXCL12, CXCR4, DLK1, DNAJB4, EDNRA, EIF2S1, FERMT1, FLT1, GABPA, GPX2, HNF1B, HNRNPL, ITGB1BP1, JAG1, KCNMA1, LEPR, LTBP1, MBNL1, MBNL2, MECOM, MLXIPL, NCOA2, NFASC, PDCD4, PDE4DIP, PRKACB, PROX1, PTGER2, S100A4, SLCO2A1, SMAD5, SSBP2, STK4, SYT1, TANK, TCF7L2, TFRC, TGFB2, THBS1, TNC, UTRN, VDR, VLDLR, WNT5A, ZFR, ZFX | 56 |
| Cardiovascular Disease, Developmental Disorder, Organismal Injury and Abnormalities                                                                                                        | perimembranous ventricular septal defect | 8.62E-07 | Increased | 2.219  | CXCL12, CXCR4, EDNRA, LTBP1, TGFB2                                                                                                                                                                                                                                                                                                                                                                              | 5  |

Table G: Gene Functions Data Shown in Figure 6

|                                                                                   |                                             |           |           |       |                                                                                                                                                                                                                                                                                                                                                                                                                                                                                                                                                                                                                                                                                                                            |     |
|-----------------------------------------------------------------------------------|---------------------------------------------|-----------|-----------|-------|----------------------------------------------------------------------------------------------------------------------------------------------------------------------------------------------------------------------------------------------------------------------------------------------------------------------------------------------------------------------------------------------------------------------------------------------------------------------------------------------------------------------------------------------------------------------------------------------------------------------------------------------------------------------------------------------------------------------------|-----|
| Cardiovascular Disease,Developmental Disorder                                     | congenital anomaly of cardiovascular system | 0.0000203 | Increased | 2.057 | ANGPT2,C4A/C4B,CXCL12,CXCR4,EDNRA,FLT1,JAG1,LTBP1,SMAD5,STK4,TGFB2                                                                                                                                                                                                                                                                                                                                                                                                                                                                                                                                                                                                                                                         | 11  |
| Cardiovascular Disease,Developmental Disorder,Organismal Injury and Abnormalities | congenital heart disease                    | 0.0000395 | Increased | 2.412 | C4A/C4B,CXCL12,CXCR4,EDNRA,FLT1,JAG1,LTBP1,SMAD5,STK4,TGFB2                                                                                                                                                                                                                                                                                                                                                                                                                                                                                                                                                                                                                                                                | 10  |
| Cancer,Organismal Injury and Abnormalities,Reproductive System Disease            | tumorigenesis of genital organ              | 1.08E-15  |           |       | ABCC9,ABHD6,ABO,ADAM10,ADAMTS9,ANGPT2,ATRX,C4A/C4B,CALCR,CALCRL,CALU,CEACAM1,CES2,CHN2,CLIC4,CPE,CPNE3,CREB1,CXCL12,CXCR4,CYP4F2,CYP4F3,DPT,EDIL3,EDNRA,EIF2S1,ELF1,ENPEP,ENTPD1,FAM198B,FERMT1,FGL2,FHL1,FHL5,FILIP1L,FLT1,GPX2,GRB10,HNF1B,HNRNPL,IQGAP1,JAG1,KCNMA1,KIF13A,LEPR,LTBP1,LYVE1,MAG1,MAP4K5,MAST4,MBNL1,MBNL2,MCAM,ME2,MECOM,MIA2,MUC5AC,NCOA2,NEFH,NFASC,OVGP1,PDCD4,PDE4DIP,PRKACB,PROX1,PTGER2,RAB23,RAPGEF3,RASAL2,RETREG1,RIOK3,S100A4,SEMA4G,SEMA6A,SENP7,SLC13A2,SLC22A18,SLC26A4,SLC39A4,SLCO2A1,SMAD5,SPAG5,SRPX2,SSBP2,STAG2,STK4,TAF13,TES,TFRC,TG,THBS1,THSD7A,TLK1,TM4SF1,TNC,TPCN1,TPM4,TSPAN5,TUBAL3,UBE3B,USH1C,UTRN,VDR,VLDLR,VPS13D,WNT5A,ZFR,ZFX,ZFY,ZNF277,ZNF480,ZNF711                | 112 |
| Cancer,Organismal Injury and Abnormalities,Reproductive System Disease            | genital tumor                               | 1.11E-15  |           |       | ABCC9,ABHD6,ABO,ADAM10,ADAMTS9,ANGPT2,ATRX,C4A/C4B,CALCR,CALCRL,CALU,CEACAM1,CES2,CHN2,CLIC4,CPE,CPNE3,CREB1,CXCL12,CXCR4,CYP4F2,CYP4F3,DPT,EDIL3,EDNRA,EIF2S1,ELF1,ENPEP,ENTPD1,FAM198B,FERMT1,FGL2,FHL1,FHL5,FILIP1L,FLT1,GPX2,GRB10,HNF1B,HNRNPL,IQGAP1,JAG1,KCNMA1,KIF13A,LEPR,LTBP1,LYVE1,MAG1,MAP4K5,MAST4,MBNL1,MBNL2,MCAM,ME2,MECOM,MIA2,MUC5AC,NCOA2,NEFH,NFASC,OVGP1,PDCD4,PDE4DIP,PRKACB,PROX1,PTGER2,RAB23,RAPGEF3,RASAL2,RETREG1,RIOK3,S100A4,SEMA4G,SEMA6A,SENP7,SLC13A2,SLC22A18,SLC26A4,SLC39A4,SLCO2A1,SMAD5,SPAG5,SRPX2,SSBP2,STAG2,STK4,TAF13,TES,TFRC,TG,THBS1,THSD7A,TLK1,TM4SF1,TNC,TPCN1,TPM4,TSPAN5,TUBAL3,UBE3B,USH1C,UTRN,VDR,VLDLR,VPS13D,WNT5A,ZFR,ZFX,ZFY,ZNF277,ZNF480,ZNF711                | 112 |
| Cancer,Organismal Injury and Abnormalities,Reproductive System Disease            | genital tract cancer                        | 3.92E-14  |           |       | ABCC9,ABHD6,ABO,ADAM10,ANGPT2,ATRX,C4A/C4B,CALCR,CALCRL,CALU,CEACAM1,CES2,CHN2,CLIC4,CPE,CPNE3,CREB1,CXCL12,CXCR4,CYP4F2,CYP4F3,DPT,EDIL3,EDNRA,EIF2S1,ELF1,ENPEP,ENTPD1,FAM198B,FERMT1,FGL2,FHL1,FHL5,FILIP1L,FLT1,GPX2,GRB10,HNF1B,HNRNPL,IQGAP1,JAG1,KCNMA1,KIF13A,LEPR,LYVE1,MAG1,MAP4K5,MAST4,MBNL1,MBNL2,MCAM,ME2,MECOM,MIA2,MUC5AC,NCOA2,NEFH,NFASC,OVGP1,PDCD4,PDE4DIP,PRKACB,PROX1,PTGER2,RASAL2,RETREG1,RIOK3,S100A4,SEMA4G,SEMA6A,SENP7,SLC13A2,SLC22A18,SLC26A4,SLC39A4,SLCO2A1,SMAD5,SPAG5,SRPX2,SSBP2,STAG2,STK4,TAF13,TES,TFRC,TG,THBS1,THSD7A,TLK1,TM4SF1,TNC,TPCN1,TPM4,TSPAN5,TUBAL3,UBE3B,USH1C,UTRN,VDR,VLDLR,VPS13D,WNT5A,ZFR,ZFX,ZFY,ZNF277,ZNF480,ZNF711                                            | 108 |
| Cancer,Organismal Injury and Abnormalities                                        | genitourinary tumor                         | 5E-14     |           |       | ABCC9,ABHD6,ABO,ADAM10,ADAMTS9,ANGPT2,ATRX,C4A/C4B,CALCR,CALCRL,CALU,CEACAM1,CES2,CHN2,CLIC4,CPE,CPNE3,CREB1,CXCL12,CXCR4,CYP4F2,CYP4F3,DPT,EDIL3,EDNRA,EIF2S1,ELF1,ENPEP,ENTPD1,FAM198B,FERMT1,FGL2,FHL1,FHL5,FILIP1L,FLT1,GPX2,GRB10,HNF1B,HNRNPL,IQGAP1,JAG1,KCNMA1,KIF13A,LEPR,LTBP1,LYVE1,MAG1,MAP4K5,MAST4,MBNL1,MBNL2,MCAM,ME2,MECOM,MIA2,MLXIPL,MUC5AC,NCOA2,NEFH,NFASC,OVGP1,PDCD4,PDE4DIP,PRKACB,PROX1,PTGER2,RAB23,RAPGEF3,RASAL2,RETREG1,RIOK3,S100A4,SEMA4G,SEMA6A,SENP7,SLC13A2,SLC22A18,SLC26A4,SLC39A4,SLCO2A1,SMAD5,SPAG5,SRPX2,SSBP2,STAG2,STK4,SULT1C2,TAF13,TES,TFRC,TG,THBS1,THSD7A,TLK1,TM4SF1,TNC,TPCN1,TPM4,TSPAN5,TUBAL3,UBE3B,USH1C,UTRN,VDR,VLDLR,VPS13D,WNT5A,ZFR,ZFX,ZFY,ZNF277,ZNF480,ZNF711 | 114 |

Table G: Gene Functions Data Shown in Figure 6

|                                                                        |                                     |          |  |        |                                                                                                                                                                                                                                                                                                                                                                                                                                                                                                                                                                                                                                                                                                  |     |
|------------------------------------------------------------------------|-------------------------------------|----------|--|--------|--------------------------------------------------------------------------------------------------------------------------------------------------------------------------------------------------------------------------------------------------------------------------------------------------------------------------------------------------------------------------------------------------------------------------------------------------------------------------------------------------------------------------------------------------------------------------------------------------------------------------------------------------------------------------------------------------|-----|
| Cancer,Organismal Injury and Abnormalities                             | pelvic cancer                       | 1.89E-13 |  |        | ABCC9,ABHD6,ABO,ADAM10,ANGPT2,ATRX,C4A/C4B,CALCR,CALCRL,CALU,CEACAM1,CES2,CHN2,CLIC4,CPE,CPNE3,CREB1,CXCL12,CXCR4,CYP4F2,CYP4F3,DPT,EDIL3,EDNRA,EIF2S1,ELF1,ENPEP,ENTPD1,FAM198B,FERMT1,FGL2,FHL1,FHL5,FILIP1L,FLT1,GPX2,GRB10,HNF1B,HNRNPL,IQGAP1,JAG1,KCNMA1,KIF13A,LEPR,LYVE1,MAGI1,MAP4K5,MAST4,MBNL1,MBNL2,MCAM,ME2,MECOM,MIA2,MUC5AC,NCOA2,NEFH,NFASC,OVGP1,PDCC4,PDE4DIP,PRKACB,PROX1,PTGER2,RASAL2,RETREG1,RIOK3,S100A4,SEMA4G,SEMA6A,SENP7,SLC13A2,SLC22A18,SLC26A4,SLC39A4,SLCO2A1,SMAD5,SPAG5,SRPX2,SSBP2,STAG2,STK4,TAF13,TCF7L2,TES,TFRC,TG,THBS1,THSD7A,TLK1,TM4SF1,TNC,TPCN1,TPM4,TSPAN5,TUBAL3,UBE3B,USH1C,UTRN,VDR,VLDLR,VPS13D,WNT5A,ZFR,ZFX,ZFY,ZNF277,ZNF480,ZNF711          | 109 |
| Cardiovascular System Development and Function                         | development of vasculature          | 6E-13    |  | -0.8   | ANGPT2,CALCRL,CEACAM1,CLIC4,CREB1,CXCL12,CXCR4,CYP4F2,DLK1,EDIL3,EDNRA,EMP1,ENPEP,FLT1,HNF1B,ITGB1BP1,JAG1,KCNMA1,LEPR,LTBP1,MCAM,NANOG,PATJ,PDCC6,PROX1,PTGER2,RAPGEF3,S100A4,SEMA6A,SMAD5,SRPX2,STK4,TCF7L2,TGFB2,THBS1,TM4SF1,TNC,VDR,VLDLR,WNT5A                                                                                                                                                                                                                                                                                                                                                                                                                                             | 40  |
| Cardiovascular System Development and Function,Organismal Development  | angiogenesis                        | 1.15E-12 |  | -0.798 | ANGPT2,CALCRL,CEACAM1,CLIC4,CREB1,CXCL12,CXCR4,CYP4F2,EDIL3,EDNRA,EMP1,ENPEP,FLT1,ITGB1BP1,JAG1,KCNMA1,LEPR,LTBP1,MCAM,NANOG,PATJ,PDCC6,PROX1,PTGER2,RAPGEF3,S100A4,SEMA6A,SMAD5,SRPX2,STK4,TCF7L2,TGFB2,THBS1,TM4SF1,TNC,VLDLR,WNT5A                                                                                                                                                                                                                                                                                                                                                                                                                                                            | 37  |
| Cancer,Organismal Injury and Abnormalities                             | urogenital cancer                   | 1.36E-12 |  |        | ABCC9,ABHD6,ABO,ADAM10,ANGPT2,ATRX,C4A/C4B,CALCR,CALCRL,CALU,CEACAM1,CES2,CHN2,CLIC4,CPE,CPNE3,CREB1,CXCL12,CXCR4,CYP4F2,CYP4F3,DPT,EDIL3,EDNRA,EIF2S1,ELF1,ENPEP,ENTPD1,FAM198B,FERMT1,FGL2,FHL1,FHL5,FILIP1L,FLT1,GPX2,GRB10,HNF1B,HNRNPL,IQGAP1,JAG1,KCNMA1,KIF13A,LEPR,LYVE1,MAGI1,MAP4K5,MAST4,MBNL1,MBNL2,MCAM,ME2,MECOM,MIA2,M LXIPL,MUC5AC,NCOA2,NEFH,NFASC,OVGP1,PDCC4,PDE4DIP,PRKACB,PROX1,PTGER2,RASAL2,RETREG1,RIOK3,S100A4,SEMA4G,SEMA6A,SENP7,SLC13A2,SLC22A18,SLC26A4,SLC39A4,SLCO2A1,SMAD5,SPAG5,SRPX2,SSBP2,STAG2,STK4,SULT1C2,TAF13,TES,TFRC,TG,THBS1,THSD7A,TLK1,TM4SF1,TNC,TPCN1,TPM4,TSPAN5,TUBAL3,UBE3B,USH1C,UTRN,VDR,VLDLR,VPS13D,WNT5A,ZFR,ZFX,ZFY,ZNF277,ZNF480,ZNF711 | 110 |
| Cardiovascular System Development and Function,Organismal Development  | vasculogenesis                      | 1.87E-12 |  | -1.079 | ANGPT2,CEACAM1,CLIC4,CREB1,CXCL12,CXCR4,CYP4F2,EDIL3,EDNRA,EMP1,FLT1,ITGB1BP1,JAG1,KCNMA1,LEPR,LTBP1,MCAM,NANOG,PATJ,PDCC6,PROX1,PTGER2,S100A4,SEMA6A,SMAD5,SRPX2,STK4,TGFB2,THBS1,TM4SF1,TNC,VLDLR,WNT5A                                                                                                                                                                                                                                                                                                                                                                                                                                                                                        | 33  |
| Cellular Movement                                                      | cell movement                       | 7.28E-12 |  | -1.304 | ABHD6,ADAM10,ADGRL3,ANGPT2,C4A/C4B,CALCRL,CALU,CEACAM1,CHN2,CLIC4,CPNE3,CREB1,CXCL12,CXCR4,DNAJB4,DPT,EDIL3,EDNRA,EFS,ENTPD1,FERMT1,FGL2,FHL1,FLT1,HNRNPL,IQGAP1,ITGB1BP1,JAG1,KCNMA1,LEPR,LYVE1,MAGI1,MCAM,NCOA2,PATJ,PCM1,PDCC4,PDCC6,PDE4DIP,PPGGT1B,PROX1,RAPGEF3,S100A4,SEMA6A,SENP7,SMAD5,SRPX2,STK4,TCF7L2,TG,TGFB2,THBS1,TM4SF1,TNC,UTRN,VDR,VLDLR,WNT5A                                                                                                                                                                                                                                                                                                                                 | 58  |
| Cancer,Organismal Injury and Abnormalities,Reproductive System Disease | tumorigenesis of reproductive tract | 6.14E-11 |  |        | ABCC9,ABHD6,ADAM10,ADAMTS9,ANGPT2,ATRX,C4A/C4B,CALCRL,CES2,CHN2,CLIC4,CPE,CPNE3,CXCL12,CXCR4,CYP4F2,CYP4F3,DPT,EDNRA,EIF2S1,ELF1,ENPEP,ENTPD1,FAM198B,FGL2,FHL1,FILIP1L,FLT1,GRB10,HNRNPL,IQGAP1,JAG1,KCNMA1,KIF13A,LTBP1,MAP4K5,MAST4,MBNL1,MCAM,MECOM,MUC5AC,NCOA2,NEFH,OVGP1,PDE4DIP,PROX1,PTGER2,RAB23,RAPGEF3,RASAL2,RIOK3,S100A4,SENP7,SLC13A2,SLC22A18,SLC39A4,SLCO2A1,SMAD5,SRPX2,STAG2,TAF13,TES,TFRC,TG,THBS1,TM4SF1,TNC,TPCN1,TPM4,TUBAL3,UBE3B,USH1C,UTRN,VDR,VLDLR,WNT5A,ZFR,ZFX,ZNF277,ZNF480                                                                                                                                                                                      | 80  |
| Cancer,Organismal Injury and Abnormalities,Reproductive System Disease | female genital neoplasm             | 6.43E-11 |  |        | ABCC9,ABHD6,ADAM10,ADAMTS9,ANGPT2,ATRX,C4A/C4B,CALCRL,CES2,CHN2,CLIC4,CPE,CPNE3,CXCL12,CXCR4,CYP4F2,CYP4F3,DPT,EDNRA,EIF2S1,ELF1,ENPEP,ENTPD1,FAM198B,FGL2,FHL1,FILIP1L,FLT1,GRB10,HNRNPL,IQGAP1,JAG1,KCNMA1,KIF13A,LTBP1,MAP4K5,MAST4,MBNL1,MCAM,MECOM,MUC5AC,NCOA2,NEFH,OVGP1,PDE4DIP,PROX1,PTGER2,RAB23,RAPGEF3,RASAL2,RIOK3,S100A4,SENP7,SLC13A2,SLC22A18,SLC39A4,SLCO2A1,SMAD5,SRPX2,STAG2,TAF13,TES,TFRC,TG,THBS1,TM4SF1,TNC,TPCN1,TPM4,TUBAL3,UBE3B,USH1C,UTRN,VDR,VLDLR,WNT5A,ZFR,ZFX,ZNF277,ZNF480                                                                                                                                                                                      | 80  |

Table G: Gene Functions Data Shown in Figure 6

|                                                                        |                               |          |  |        |                                                                                                                                                                                                                                                                                                                                                                                                                                                                                                                                                                                                                                                                                                                                                                                                                                                                                                  |     |
|------------------------------------------------------------------------|-------------------------------|----------|--|--------|--------------------------------------------------------------------------------------------------------------------------------------------------------------------------------------------------------------------------------------------------------------------------------------------------------------------------------------------------------------------------------------------------------------------------------------------------------------------------------------------------------------------------------------------------------------------------------------------------------------------------------------------------------------------------------------------------------------------------------------------------------------------------------------------------------------------------------------------------------------------------------------------------|-----|
| Cellular Movement                                                      | cell movement of cancer cells | 3.44E-10 |  | -1.716 | ADAM10,CEACAM1,CXCL12,CXCR4,FLT1,IQGAP1,MCAM,RAPGEF3,TGFB2,THBS1,TM4SF1,TNC,WN T5A                                                                                                                                                                                                                                                                                                                                                                                                                                                                                                                                                                                                                                                                                                                                                                                                               | 13  |
| Cancer,Organismal Injury and Abnormalities,Reproductive System Disease | uterine tumor                 | 7.14E-10 |  |        | ABCC9,ABHD6,ADAM10,ANGPT2,ATRX,CALCRL,CES2,CHN2,CPNE3,CXCL12,CYP4F2,CYP4F3,DPT,EDNRA,EIF2S1,ELF1,ENPEP,ENTPD1,FAM198B,FGL2,FHL1,FILIP1L,FLT1,GRB10,HNRNPL,IQGAP1,JAG1,KCNMA1,KIF13A,LTBP1,MAP4K5,MAST4,MBNL1,MECOM,MUC5AC,NEFH,PDE4DIP,PROX1,RAB23,RAPGEF3,RASAL2,RIOK3,S100A4,SENP7,SLC13A2,SLCO2A1,SMAD5,SRPX2,STAG2,TAF13,TES,TFRC,TG,THBS1,TNC,TPCN1,UBE3B,USH1C,UTRN,VDR,VLDLR,WNT5A,ZFR,ZFX,ZNF277,ZNF480                                                                                                                                                                                                                                                                                                                                                                                                                                                                                  | 66  |
| Cancer,Organismal Injury and Abnormalities                             | benign neoplasia              | 8.75E-10 |  | 1.131  | ANGPT2,ATRX,C4A/C4B,CALCRL,CEACAM1,CES2,CXCL12,DPT,EDNRA,ENPEP,FLT1,ID4,IQGAP1,JAG1,LEPR,LTBP1,MCAM,MECOM,PDCD4,PTGER2,RAB23,RAPGEF3,S100A4,SLC39A4,SMAD5,SSBP2,STAG2,TAF13,TG,THBS1,TNC,UTRN,VDR                                                                                                                                                                                                                                                                                                                                                                                                                                                                                                                                                                                                                                                                                                | 33  |
| Cancer,Organismal Injury and Abnormalities,Reproductive System Disease | Prostate Cancer and Tumors    | 8.82E-10 |  |        | ABCC9,ABO,ADAM10,ATRX,C4A/C4B,CALCR,CALCRL,CALU,CEACAM1,CES2,CPE,CPNE3,CREB1,CXCR4,EDIL3,EDNRA,EIF2S1,ENTPD1,FERMT1,FHL5,FILIP1L,FLT1,GPX2,HNF1B,JAG1,KCNMA1,LEPR,LYVE1,MAG1,MAP4K5,MAST4,MBNL2,ME2,MECOM,MIA2,MUC5AC,NCOA2,NEFH,NFASC,PDCD4,PDE4DIP,PRKACB,PROX1,RASAL2,RETREG1,RIOK3,SEMA4G,SEMA6A,SENP7,SLC26A4,SMAD5,SPAG5,SSBP2,STAG2,STK4,TAF13,TG,THSD7A,TLK1,TNC,TSPAN5,UBE3B,USH1C,UTRN,VDR,VLDLR,VPS13D,WNT5A,ZFR,ZFY,ZNF277,ZNF711                                                                                                                                                                                                                                                                                                                                                                                                                                                    | 72  |
| Cancer,Organismal Injury and Abnormalities                             | genitourinary carcinoma       | 1.88E-09 |  |        | ABCC9,ABHD6,ABO,ADAM10,ANGPT2,ATRX,C4A/C4B,CALCR,CALCRL,CALU,CEACAM1,CES2,CHN2,CPE,CPNE3,CREB1,CXCL12,CYP4F2,CYP4F3,EDIL3,EIF2S1,ELF1,ENPEP,ENTPD1,FAM198B,FERMT1,FHL5,FILIP1L,FLT1,GRB10,HNF1B,HNRNPL,IQGAP1,JAG1,KCNMA1,KIF13A,LEPR,LYVE1,MAG1,MAP4K5,MAST4,MBNL1,MBNL2,MCAM,ME2,MECOM,MIA2,MLXIPL,MUC5AC,NCOA2,NEFH,NFASC,OVGP1,PDCD4,PDE4DIP,PRKACB,PROX1,PTGER2,RASAL2,RETREG1,RIOK3,SEMA4G,SEMA6A,SENP7,SLC13A2,SLC22A18,SLC26A4,SLC39A4,SLCO2A1,SMAD5,SPAG5,SRPX2,SSBP2,STAG2,SULT1C2,TES,TG,THBS1,THSD7A,TLK1,TM4SF1,TNC,TPCN1,TSPAN5,TUBAL3,UBE3B,USH1C,UTRN,VDR,VLDLR,VPS13D,WNT5A,ZFR,ZFX,ZFY,ZNF277,ZNF480,ZNF711                                                                                                                                                                                                                                                                    | 98  |
| Cancer,Organismal Injury and Abnormalities,Reproductive System Disease | prostate cancer               | 5.11E-09 |  |        | ABCC9,ABO,ADAM10,ATRX,C4A/C4B,CALCR,CALCRL,CALU,CEACAM1,CES2,CPE,CREB1,CXCR4,EDIL3,EDNRA,EIF2S1,ENTPD1,FERMT1,FHL5,FILIP1L,FLT1,GPX2,HNF1B,KCNMA1,LEPR,LYVE1,MAG1,MAP4K5,MAST4,MBNL2,ME2,MECOM,MIA2,MUC5AC,NCOA2,NEFH,NFASC,PDCD4,PDE4DIP,PRKACB,PROX1,RASAL2,RETREG1,RIOK3,SEMA4G,SEMA6A,SENP7,SLC26A4,SMAD5,SPAG5,SSBP2,STAG2,STK4,TAF13,TG,THSD7A,TLK1,TNC,TSPAN5,UBE3B,USH1C,UTRN,VDR,VLDLR,VPS13D,WNT5A,ZFR,ZFY,ZNF277,ZNF711                                                                                                                                                                                                                                                                                                                                                                                                                                                               | 70  |
| Cancer,Organismal Injury and Abnormalities                             | abdominal neoplasm            | 5.26E-09 |  | 0.611  | ABCC9,ABHD6,ABO,ADAM10,ADAMTS9,ALDH6A1,ALLC,ANGPT2,ATRX,BAG2,C4A/C4B,CALCR,CALCRL,CALU,CDC40,CEACAM1,CES2,CHN2,CLIC4,CPE,CPNE3,CREB1,CXCL12,CXCR4,CYP4F2,CYP4F3,DLK1,DNAJB4,DPT,EDIL3,EDNRA,EF3,EIF2S1,ELF1,EMP1,ENOSF1,ENPEP,ENTPD1,FAM198B,FAM216A,FERMT1,FGL2,FHL1,FHL5,FILIP1L,FLT1,GGH,GPX2,GRB10,HNF1B,HNRNPL,ID4,IQGAP1,ITGB1P1,JAG1,KCNMA1,KIF13A,LEPR,LHPP,LTBP1,LYVE1,MAG1,MAP4K5,MAST4,MBNL1,MBNL2,MCAM,MDFIC,ME2,MECOM,MIA2,MLXIPL,MUC5AC,NCOA2,NEFH,NFASC,NR1D2,NUPR1,OVGP1,PAMR1,PCM1,PDCD4,PDE4DIP,PGGT1B,PLCL2,PRKACB,PROX1,PROZ,PTGER2,RAB23,RAPGEF3,RASAL2,RETREG1,RIOK3,S100A4,SEMA4G,SEMA6A,SENP7,SLC13A2,SLC22A18,SLC26A4,SLC38A2,SLC39A4,SLCO2A1,SMAD5,SPAG5,SPTLC3,SRPX2,SSBP2,STAG2,STK4,SULT1C2,SYT1,TAF13,TCF7L2,TES,TFRC,TG,TGFB2,THBS1,THSD7A,TLK1,TM4SF1,TMX1,TNC,TPCN1,TPM4,TSPAN5,TUBAL3,UBE3B,USH1C,UTRN,VDR,VLDLR,VPS13D,WNT5A,ZFR,ZFX,ZFY,ZNF277,ZNF480,ZNF711 | 142 |

Table G: Gene Functions Data Shown in Figure 6

|                                                                                 |                                   |          |  |        |                                                                                                                                                                                                                                                                                                                                                                                                                                                                                                                                                                                                                                                                                                                                                                                                                                                                                                                                                                  |     |
|---------------------------------------------------------------------------------|-----------------------------------|----------|--|--------|------------------------------------------------------------------------------------------------------------------------------------------------------------------------------------------------------------------------------------------------------------------------------------------------------------------------------------------------------------------------------------------------------------------------------------------------------------------------------------------------------------------------------------------------------------------------------------------------------------------------------------------------------------------------------------------------------------------------------------------------------------------------------------------------------------------------------------------------------------------------------------------------------------------------------------------------------------------|-----|
| Cancer,Organismal Injury and Abnormalities                                      | cancer of secretory structure     | 7.03E-09 |  |        | ABCC9,ABO,ADAM10,AMY1C (includes others),ANGPT2,ATRX,C4A/C4B,CALCR,CALCRL,CALU,CEACAM1,CES2,CPE,CREB1,CXCL12,CXCR4,EDIL3,EDNRA,EIF2S1,ENOSF1,ENTPD1,FERMT1,FHL1,FHL5,FILIP1L,FLT1,GPX2,GRB10,HNF1B,HNRNPL,IQGAP1,KCNMA1,LEPR,LTBP1,LYVE1,MAGI1,MAP4K5,MAST4,MBNL2,MCAM,ME2,MECOM,MIA2,MUC5AC,NCOA2,NEFH,NFASC,PCM1,PDCD4,PDE4DIP,PRKACB,PROX1,RASAL2,RETREG1,RIOK3,SEMA4G,SEMA6A,SENP7,SLC22A18,SLC26A4,SMAD5,SPAG5,SPTLC3,SSBP2,STAG2,STK4,TAF13,TG,TGFB2,THBS1,THSD7A,TLK1,TNC,TSPAN5,UBE3B,USH1C,UTRN,VDR,VLDLR,VPS13D,WNT5A,ZFR,ZFX,ZFY,ZNF277,ZNF480,ZNF711                                                                                                                                                                                                                                                                                                                                                                                                 | 87  |
| Cancer,Organismal Injury and Abnormalities                                      | abdominal cancer                  | 7.61E-09 |  | 0.647  | ABCC9,ABHD6,ABO,ADAM10,ADAMTS9,ALDH6A1,ALLC,ANGPT2,ATRX,BAG2,C4A/C4B,CALCR,CALCRL,CALU,CDC40,CEACAM1,CES2,CHN2,CLIC4,CPE,CPNE3,CREB1,CXCL12,CXCR4,CYP4F2,CYP4F3,DLK1,DNAJB4,DPT,EDIL3,EDNRA,EFS,EIF2S1,ELF1,EMP1,ENOSF1,ENPEP,ENTPD1,FAM198B,FAM216A,FERMT1,FGL2,FHL1,FHL5,FILIP1L,FLT1,GGH,GPX2,GRB10,HNF1B,HNRNPL,ID4,IQGAP1,JAG1,KCNMA1,KIF13A,LEPR,LHPP,LTBP1,LYVE1,MAGI1,MAP4K5,MAST4,MBNL1,MBNL2,MCAM,MDFIC,ME2,MECOM,MIA2,MLXIPL,MUC5AC,NCOA2,NEFH,NFASC,NR1D2,NUPR1,OVGP1,PAMR1,PCM1,PDCD4,PDE4DIP,PGGT1B,PLCL2,PRKACB,PROX1,PROZ,PTGER2,RAB23,RAPGEF3,RASAL2,RETREG1,RIOK3,S100A4,SEMA4G,SEMA6A,SENP7,SLC13A2,SLC22A18,SLC26A4,SLC38A2,SLC39A4,SLCO2A1,SMAD5,SPAG5,SPTLC3,SRPX2,SSBP2,STAG2,STK4,SULT1C2,SYT1,TAF13,TCF7L2,TES,TFRC,TG,TGFB2,THBS1,THSD7A,TLK1,TM4SF1,TMX1,TNC,TPCN1,TPM4,TSPAN5,TUBAL3,UBE3B,USH1C,UTRN,VDR,VLDLR,VPS13D,WNT5A,ZFR,ZFX,ZFY,ZNF277,ZNF480,ZNF711                                                                        | 141 |
| Cancer,Organismal Injury and Abnormalities                                      | cancer                            | 9.6E-09  |  | -0.482 | ABCC9,ABHD6,ABO,ADAM10,ADAMTS9,ADGRL3,ALDH6A1,ALLC,AMY1C (includes others),ANGPT2,ATRX,BAG2,C4A/C4B,CALCR,CALCRL,CALU,CDC40,CEACAM1,CES2,CHN2,CLIC4,CPE,CPNE3,CREB1,CXCL12,CXCR4,CYP4F2,CYP4F3,DLK1,DNAJB4,DPT,EDIL3,EDNRA,EFS,EIF2S1,ELF1,EMP1,ENOSF1,ENPEP,ENTPD1,FAM198B,FAM216A,FERMT1,FGL2,FHL1,FHL5,FILIP1L,FLT1,GGH,GPX2,GRB10,HIST1H2BK,HNF1B,HNRNPL,HSF2,ID4,IQGAP1,JAG1,KCNMA1,KIF13A,LEPR,LHPP,LTBP1,LYVE1,MAGI1,MAP4K5,MAST4,MBNL1,MBNL2,MCAM,MDFIC,ME2,MECOM,MIA2,MLXIPL,MSMO1,MUC5AC,NANOG,NCOA2,NEFH,NFASC,NR1D2,NUPR1,OVGP1,PAMR1,PCM1,PDCD4,PDCD6,PDE4DIP,PGGT1B,PLCL2,PRKACB,PROX1,PROZ,PTGER2,RAB23,RAPGEF3,RASAL2,RETREG1,RIOK3,RSPH14,S100A4,SEMA4G,SEMA6A,SENP7,SLC13A2,SLC22A18,SLC26A4,SLC38A2,SLC39A4,SLCO2A1,SMAD5,SPAG5,SPTLC3,SRPX2,SSBP2,STAG2,STK4,SULT1C2,SYT1,TAF13,TCF7L2,TES,TFRC,TG,TGFB2,THBS1,THSD7A,TLK1,TM4SF1,TMX1,TNC,TPCN1,TPM4,TSPAN5,TUBAL3,UBE3B,USH1C,UTRN,VDR,VLDLR,VPS13D,WNT5A,ZFR,ZFX,ZFY,ZNF277,ZNF480,ZNF711 | 149 |
| Cancer,Organismal Injury and Abnormalities,Reproductive System Disease          | female genital tract cancer       | 1.09E-08 |  |        | ABCC9,ABHD6,ADAM10,ANGPT2,ATRX,C4A/C4B,CES2,CHN2,CLIC4,CPE,CPNE3,CXCL12,CXCR4,CYP4F2,CYP4F3,DPT,EDNRA,EIF2S1,ELF1,ENPEP,ENTPD1,FAM198B,FGL2,FHL1,FILIP1L,FLT1,GRB10,HNRNPL,IQGAP1,JAG1,KCNMA1,KIF13A,MAP4K5,MAST4,MBNL1,MCAM,MECOM,MUC5AC,NCOA2,NEFH,OVGP1,PDE4DIP,PROX1,PTGER2,RASAL2,RIOK3,S100A4,SENP7,SLC13A2,SLC22A18,SLC39A4,SLCO2A1,SRPX2,STAG2,TES,TFRC,TG,THBS1,TM4SF1,TNC,TPCN1,TPM4,TUBAL3,UBE3B,USH1C,UTRN,VDR,VLDLR,WNT5A,ZFR,ZFX,ZNF277,ZNF480                                                                                                                                                                                                                                                                                                                                                                                                                                                                                                     | 73  |
| Cellular Movement                                                               | migration of melanoma cells       | 1.54E-08 |  | -0.555 | ADAM10,CEACAM1,CXCR4,MCAM,RAPGEF3,TNC                                                                                                                                                                                                                                                                                                                                                                                                                                                                                                                                                                                                                                                                                                                                                                                                                                                                                                                            | 6   |
| Organ Morphology,Reproductive System Development and Function,Tissue Morphology | quantity of primordial germ cells | 1.54E-08 |  | -1.718 | CXCL12,CXCR4,SMAD5,TGFB2,WNT5A,ZFX                                                                                                                                                                                                                                                                                                                                                                                                                                                                                                                                                                                                                                                                                                                                                                                                                                                                                                                               | 6   |
| Cancer,Organismal Injury and Abnormalities,Reproductive System Disease          | prostatic carcinoma               | 2.74E-08 |  |        | ABCC9,ABO,ADAM10,ATRX,C4A/C4B,CALCR,CALCRL,CALU,CEACAM1,CES2,CPE,CREB1,EDIL3,EIF2S1,ENTPD1,FERMT1,FHL5,FILIP1L,FLT1,HNF1B,KCNMA1,LEPR,LYVE1,MAGI1,MAP4K5,MAST4,MBNL2,ME2,MECOM,MIA2,MUC5AC,NCOA2,NEFH,NFASC,PDCD4,PDE4DIP,PRKACB,PROX1,RASAL2,RETREG1,RIOK3,SEMA4G,SEMA6A,SENP7,SLC26A4,SMAD5,SPAG5,SSBP2,STAG2,TG,THSD7A,TLK1,TNC,UBE3B,USH1C,UTRN,VLDLR,VPS13D,ZFR,ZFY,ZNF277,ZNF711                                                                                                                                                                                                                                                                                                                                                                                                                                                                                                                                                                           | 62  |



Table G: Gene Functions Data Shown in Figure 6

|                                                                          |                                         |          |  |        |                                                                                                                                                                                                                                                                                                                                                                                                                                                                                                                                                                                                                                                                                                                                                                                                                                                                                                                                                                                                                                                                                                                  |     |
|--------------------------------------------------------------------------|-----------------------------------------|----------|--|--------|------------------------------------------------------------------------------------------------------------------------------------------------------------------------------------------------------------------------------------------------------------------------------------------------------------------------------------------------------------------------------------------------------------------------------------------------------------------------------------------------------------------------------------------------------------------------------------------------------------------------------------------------------------------------------------------------------------------------------------------------------------------------------------------------------------------------------------------------------------------------------------------------------------------------------------------------------------------------------------------------------------------------------------------------------------------------------------------------------------------|-----|
| Tissue Development                                                       | development of epithelial tissue        | 3.71E-08 |  | 0.622  | ANGPT2, ATRX, CEACAM1, CLIC4, CXCL12, CXCR4, CYP4F2, FLT1, HNF1B, ITGB1BP1, JAG1, LEPR, MCAM, NANOG, PDCD6, PROX1, SEMA6A, TGFB2, THBS1, VLDLR, WNT5A                                                                                                                                                                                                                                                                                                                                                                                                                                                                                                                                                                                                                                                                                                                                                                                                                                                                                                                                                            | 21  |
| Cancer, Organismal Injury and Abnormalities, Reproductive System Disease | uterine cancer                          | 3.84E-08 |  |        | ABCC9, ABHD6, ADAM10, ANGPT2, ATRX, CES2, CHN2, CPNE3, CXCL12, CYP4F2, CYP4F3, DPT, EDNRA, EIF2S1, ELF1, ENPEP, ENTPD1, FAM198B, FGL2, FHL1, FILIP1L, FLT1, GRB10, HNRNPL, IQGAP1, JAG1, KCNMA1, KIF13A, MAP4K5, MAST4, MBNL1, MECOM, MUC5AC, NEFH, PDE4DIP, PROX1, RASAL2, RIOK3, S100A4, SENP7, SLC13A2, SLC20A1, SRPX2, STAG2, TES, TFRC, TG, THBS1, TNC, TPCN1, UBE3B, USH1C, UTRN, VDR, VLDLR, WNT5A, ZFR, ZFX, ZNF277, ZNF480                                                                                                                                                                                                                                                                                                                                                                                                                                                                                                                                                                                                                                                                              | 60  |
| Organismal Development                                                   | morphology of body cavity               | 4.52E-08 |  |        | ABCC9, ADAM10, ADAMTS9, ANGPT2, C4A/C4B, CALCRL, CEACAM1, CREB1, CXCL12, CXCR4, DLK1, EDNRA, EFS, FERMT1, FLT1, GABPA, HNF1B, HNRNPL, IQGAP1, JAG1, LEPR, LTBP1, MBNL1, MBNL2, MECOM, MLXIPL, MUC5AC, NUPR1, PTGER2, RAPGEF3, SLC20A1, SSBP2, STK4, TCF7L2, TG, TGFB2, THBS1, USH1C, VDR, WNT5A                                                                                                                                                                                                                                                                                                                                                                                                                                                                                                                                                                                                                                                                                                                                                                                                                  | 40  |
| Cancer, Organismal Injury and Abnormalities                              | growth of malignant tumor               | 4.92E-08 |  | -0.723 | ADAM10, CEACAM1, CREB1, CXCL12, CXCR4, DLK1, ENTPD1, FHL1, JAG1, LEPR, MCAM, PGGT1B, PROX1, TCF7L2, TGFB2, THBS1, TNC, VDR, WNT5A                                                                                                                                                                                                                                                                                                                                                                                                                                                                                                                                                                                                                                                                                                                                                                                                                                                                                                                                                                                | 19  |
| Cancer, Organismal Injury and Abnormalities                              | solid tumor                             | 5.1E-08  |  | -0.293 | ABCC9, ABHD6, ABO, ADAM10, ADAMTS9, ALDH6A1, ALLC, AMY1C (includes others), ANGPT2, ATRX, BAG2, C4A/C4B, CALCR, CALCRL, CALU, CDC40, CEACAM1, CES2, CHN2, CLIC4, CPNE, CPNE3, CREB1, CXCL12, CXCR4, CYP4F2, CYP4F3, DLK1, DNAJB4, DPT, EDIL3, EDNRA, EFS, EIF2S1, ELF1, EMP1, ENOSF1, ENPEP, ENTPD1, FAM198B, FAM216A, FERMT1, FGL2, FHL1, FHL5, FILIP1L, FLT1, GGH, GPX2, GRB10, HIST1H2BK, HNF1B, HNRNPL, HSF2, ID4, IQGAP1, ITGB1BP1, JAG1, KCNMA1, KIF13A, LEPR, LHPP, LTBP1, LYVE1, MAGI1, MAP4K5, MAST4, MBNL1, MBNL2, MCAM, MDFIC, ME2, MECOM, MIA2, MLXIPL, MUC5AC, NANOG, NCOA2, NEFH, NFASC, NR1D2, NUPR1, OVGP1, PAMR1, PCM1, PDCD4, PDCD6, PDE4DIP, PGGT1B, PLCL2, PRKACB, PROX1, PROZ, PTGER2, RAB23, RAPGEF3, RASAL2, RETREG1, RIOK3, RSPH14, S100A4, SEMA4G, SEMA6A, SENP7, SLC13A2, SLC22A18, SLC26A4, SLC38A2, SLC39A4, SLC20A1, SMAD5, SPAG5, SPTLC3, SRPX2, SSBP2, STAG2, STK4, SULT1C2, SYT1, TAF13, TCF7L2, TES, TFRC, TG, TGFB2, THBS1, THSD7A, TLK1, TM4SF1, TMX1, TNC, TPCN1, TPM4, TSPAN5, TUBAL3, UBE3B, USH1C, UTRN, VDR, VLDLR, VPS13D, WNT5A, ZFR, ZFX, ZFY, ZNF277, ZNF480, ZNF711 | 148 |
| Cardiovascular System Development and Function, Cellular Movement        | cell movement of endothelial cells      | 6.48E-08 |  | -1.4   | ADAM10, ANGPT2, CEACAM1, CXCL12, CXCR4, EDIL3, FLT1, ITGB1BP1, MCAM, PDCD6, PROX1, RAPGEF3, S100A4, TG, TGFB2, THBS1, WNT5A                                                                                                                                                                                                                                                                                                                                                                                                                                                                                                                                                                                                                                                                                                                                                                                                                                                                                                                                                                                      | 17  |
| Cardiovascular System Development and Function, Tissue Development       | development of endothelial tissue       | 7.31E-08 |  | 0.622  | ANGPT2, CEACAM1, CLIC4, CXCL12, CXCR4, CYP4F2, FLT1, ITGB1BP1, MCAM, NANOG, PDCD6, PROX1, SEMA6A, TGFB2, THBS1, VLDLR, WNT5A                                                                                                                                                                                                                                                                                                                                                                                                                                                                                                                                                                                                                                                                                                                                                                                                                                                                                                                                                                                     | 17  |
| Cancer, Organismal Injury and Abnormalities, Reproductive System Disease | benign neoplasm of female genital organ | 7.49E-08 |  |        | ATRX, C4A/C4B, CALCRL, DPT, ENPEP, IQGAP1, LTBP1, MCAM, MECOM, PTGER2, RAB23, RAPGEF3, SLC39A4, SMAD5, STAG2, TAF13, TNC, UTRN, VDR                                                                                                                                                                                                                                                                                                                                                                                                                                                                                                                                                                                                                                                                                                                                                                                                                                                                                                                                                                              | 19  |
| Cancer, Organismal Injury and Abnormalities                              | advanced malignant tumor                | 7.85E-08 |  | -1.897 | ADAM10, ANGPT2, C4A/C4B, CREB1, CXCL12, CXCR4, EDNRA, EFS, EMP1, ENPEP, FLT1, JAG1, KCNMA1, MAGI1, MAP4K5, MCAM, MECOM, NANOG, PDCD4, PROX1, PTGER2, S100A4, SLC39A4, TCF7L2, TGFB2, THBS1, TM4SF1, TNC, VDR, WNT5A                                                                                                                                                                                                                                                                                                                                                                                                                                                                                                                                                                                                                                                                                                                                                                                                                                                                                              | 30  |

Table G: Gene Functions Data Shown in Figure 6

|                                                                                        |                                     |          |        |                                                                                                                                                                                                                                                                                                                                                                                                                                                                                                                                                                                                                                                                                                                                                                                                                                                                                                                                                     |     |
|----------------------------------------------------------------------------------------|-------------------------------------|----------|--------|-----------------------------------------------------------------------------------------------------------------------------------------------------------------------------------------------------------------------------------------------------------------------------------------------------------------------------------------------------------------------------------------------------------------------------------------------------------------------------------------------------------------------------------------------------------------------------------------------------------------------------------------------------------------------------------------------------------------------------------------------------------------------------------------------------------------------------------------------------------------------------------------------------------------------------------------------------|-----|
| Cancer,Organismal Injury and Abnormalities                                             | non-melanoma solid tumor            | 8.77E-08 | -0.347 | ABCC9,ABHD6,ABO,ADAM10,ADAMTS9,ALDH6A1,ALLC,AMY1C (includes others),ANGPT2,ATRX,BAG2,C4A/C4B,CALCR,CALCRL,CALU,CDC40,CEACAM1,CES2,CHN2,CPE,CPNE3,CREB1,CXCL12,CXCR4,CYP4F2,CYP4F3,DLK1,DNAJB4,DPT,EDIL3,EDNRA,EFS,EIF2S1,ELF1,ENOSF1,ENPEP,ENTPD1,FAM198B,FAM216A,FERMT1,FGL2,FHL1,FHL5,FILIP1L,FLT1,GGH,GPX2,GRB10,HIST1H2BK,HNF1B,HNRNPL,ID4,IQGAP1,JAG1,KCNMA1,KIF13A,LEPR,LHPP,LTBP1,LYVE1,MAGI1,MAP4K5,MAST4,MBNL1,MBNL2,MCAM,MDFIC,ME2,MECOM,MIA2,MLXIPL,MUC5AC,NANOG,NCOA2,NEFH,NFASC,NR1D2,NUPR1,OVGP1,PAMR1,PCM1,PCDC4,PCDC6,PDE4DIP,PGGT1B,PLCL2,PRKACB,PROX1,PROZ,PTGER2,RAB23,RAPGEF3,RASAL2,RETREG1,RIOK3,RSPH14,S100A4,SEMA4G,SEMA6A,SENP7,SLC13A2,SLC22A18,SLC26A4,SLC38A2,SLC39A4,SLCO2A1,SMAD5,SPAG5,SPTLC3,SRPX2,SSBP2,STAG2,SULT1C2,SYT1,TAF13,TCF7L2,TES,TFRC,TG,TGFB2,THBS1,THSD7A,TLK1,TM4SF1,TMX1,TNC,TPCN1,TSPAN5,TUBAL3,UBE3B,USH1C,UTRN,VDR,VLDLR,VPS13D,WNT5A,ZFR,ZFX,ZFY,ZNF277,ZNF480,ZNF711                           | 142 |
| Cancer,Organismal Injury and Abnormalities                                             | malignant solid tumor               | 8.84E-08 | -0.029 | ABCC9,ABHD6,ABO,ADAM10,ADAMTS9,ALDH6A1,ALLC,AMY1C (includes others),ANGPT2,ATRX,BAG2,C4A/C4B,CALCR,CALCRL,CALU,CDC40,CEACAM1,CES2,CHN2,CLIC4,CPE,CPNE3,CREB1,CXCL12,CXCR4,CYP4F2,CYP4F3,DLK1,DNAJB4,DPT,EDIL3,EDNRA,EFS,EIF2S1,ELF1,EMP1,ENOSF1,ENPEP,ENTPD1,FAM198B,FAM216A,FERMT1,FGL2,FHL1,FHL5,FILIP1L,FLT1,GGH,GPX2,GRB10,HIST1H2BK,HNF1B,HNRNPL,HSF2,ID4,IQGAP1,JAG1,KCNMA1,KIF13A,LEPR,LHPP,LTBP1,LYVE1,MAGI1,MAP4K5,MAST4,MBNL1,MBNL2,MCAM,MDFIC,ME2,MECOM,MIA2,MLXIPL,MUC5AC,NANOG,NCOA2,NEFH,NFASC,NR1D2,NUPR1,OVGP1,PAMR1,PCM1,PCDC4,PCDC6,PDE4DIP,PGGT1B,PLCL2,PRKACB,PROX1,PROZ,PTGER2,RAB23,RAPGEF3,RASAL2,RETREG1,RIOK3,RSPH14,S100A4,SEMA4G,SEMA6A,SENP7,SLC13A2,SLC22A18,SLC26A4,SLC38A2,SLC39A4,SLCO2A1,SMAD5,SPAG5,SPTLC3,SRPX2,SSBP2,STAG2,STK4,SULT1C2,SYT1,TAF13,TCF7L2,TES,TFRC,TG,TGFB2,THBS1,THSD7A,TLK1,TM4SF1,TMX1,TNC,TPCN1,TPM4,TSPAN5,TUBAL3,UBE3B,USH1C,UTRN,VDR,VLDLR,VPS13D,WNT5A,ZFR,ZFX,ZFY,ZNF277,ZNF480,ZNF711 | 147 |
| Cancer,Organismal Injury and Abnormalities                                             | growth of tumor                     | 9.12E-08 | -0.813 | ADAM10,ANGPT2,CEACAM1,CREB1,CXCL12,CXCR4,DLK1,ENTPD1,FHL1,FLT1,IQGAP1,JAG1,LEPR,MCAM,NCOA2,PGGT1B,PROX1,PTGER2,SMAD5,TCF7L2,TG,TGFB2,THBS1,TMX1,TNC,VDR,WNT5A                                                                                                                                                                                                                                                                                                                                                                                                                                                                                                                                                                                                                                                                                                                                                                                       | 27  |
| Tissue Development                                                                     | growth of epithelial tissue         | 9.92E-08 | 0.24   | ANGPT2,CEACAM1,CXCL12,CXCR4,CYP4F2,EDNRA,FERMT1,FLT1,HNF1B,ITGB1BP1,LEPR,MCAM,NANOG,NCOA2,PCDC6,PROX1,PTGER2,SEMA6A,TCF7L2,TGFB2,THBS1,VDR,VLDLR,WNT5A                                                                                                                                                                                                                                                                                                                                                                                                                                                                                                                                                                                                                                                                                                                                                                                              | 24  |
| Cardiovascular System Development and Function,Organ Morphology,Organismal Development | morphology of heart                 | 1.01E-07 |        | ABCC9,ADAM10,ADAMTS9,ANGPT2,CALCRL,CREB1,CXCL12,CXCR4,EDNRA,FLT1,JAG1,LEPR,LTBP1,MBNL1,MBNL2,MECOM,RAPGEF3,SLCO2A1,STK4,TG,TGFB2,THBS1,VDR                                                                                                                                                                                                                                                                                                                                                                                                                                                                                                                                                                                                                                                                                                                                                                                                          | 23  |
| Cardiovascular System Development and Function                                         | morphology of cardiovascular system | 1.08E-07 |        | ABCC9,ADAM10,ADAMTS9,ANGPT2,CALCRL,CLIC4,CREB1,CXCL12,CXCR4,EDNRA,FLT1,ITGB1BP1,JAG1,LEPR,LTBP1,MBNL1,MBNL2,MECOM,RAPGEF3,SLCO2A1,SMAD5,STK4,TFRC,TG,TGFB2,THBS1,VDR                                                                                                                                                                                                                                                                                                                                                                                                                                                                                                                                                                                                                                                                                                                                                                                | 27  |
| Organismal Injury and Abnormalities,Reproductive System Disease                        | abnormal growth in endometrium      | 1.12E-07 |        | ABCC9,ABHD6,ANGPT2,ATRX,CES2,CHN2,CPNE3,CXCL12,CYP4F2,CYP4F3,DPT,EDNRA,EIF2S1,ELF1,ENPEP,ENTPD1,FAM198B,FGL2,FHL1,FILIP1L,GRB10,HNRNPL,IQGAP1,JAG1,KCNMA1,KIF13A,MAP4K5,MAST4,MBNL1,MECOM,MUC5AC,NEFH,PDE4DIP,PROX1,PTGER2,RASAL2,RIOK3,S100A4,SENP7,SLC13A2,SRPX2,STAG2,TES,TG,THBS1,TNC,TPCN1,UBE3B,USH1C,UTRN,VDR,VLDLR,ZFR,ZFX,ZNF277,ZNF480                                                                                                                                                                                                                                                                                                                                                                                                                                                                                                                                                                                                    | 56  |
| Organismal Injury and Abnormalities,Reproductive System Disease                        | abnormality of endometrium          | 1.21E-07 |        | ABCC9,ABHD6,ANGPT2,ATRX,CES2,CHN2,CPNE3,CXCL12,CYP4F2,CYP4F3,DPT,EDNRA,EIF2S1,ELF1,ENPEP,ENTPD1,FAM198B,FGL2,FHL1,FILIP1L,GRB10,HNRNPL,IQGAP1,JAG1,KCNMA1,KIF13A,MAP4K5,MAST4,MBNL1,MECOM,MUC5AC,NEFH,PDE4DIP,PROX1,PTGER2,RASAL2,RIOK3,S100A4,SENP7,SLC13A2,SRPX2,STAG2,TES,TG,THBS1,TNC,TPCN1,UBE3B,USH1C,UTRN,VDR,VLDLR,ZFR,ZFX,ZNF277,ZNF480                                                                                                                                                                                                                                                                                                                                                                                                                                                                                                                                                                                                    | 56  |
| Embryonic Development,Organismal Development                                           | development of head                 | 1.46E-07 | -0.673 | ADAM10,ADAMTS9,ATRX,CLIC4,CREB1,CXCL12,CXCR4,DPT,EDNRA,HNF1B,ID4,JAG1,LYVE1,MECOM,MUC5AC,NEFH,PROX1,RAPGEF3,S100A4,SEMA6A,SMAD5,TCF7L2,TG,TGFB2,THBS1,TM4SF1,TNC,USH1C,VLDLR,WNT5A                                                                                                                                                                                                                                                                                                                                                                                                                                                                                                                                                                                                                                                                                                                                                                  | 30  |

Table G: Gene Functions Data Shown in Figure 6

|                                                                                                                                                                                        |                                    |            |  |        |                                                                                                                                                                                                                                                                                                                                                                                                                                                        |    |
|----------------------------------------------------------------------------------------------------------------------------------------------------------------------------------------|------------------------------------|------------|--|--------|--------------------------------------------------------------------------------------------------------------------------------------------------------------------------------------------------------------------------------------------------------------------------------------------------------------------------------------------------------------------------------------------------------------------------------------------------------|----|
| Cardiovascular System Development and Function, Cellular Development, Cellular Function and Maintenance, Cellular Growth and Proliferation, Organismal Development, Tissue Development | proliferation of endothelial cells | 0.00000019 |  | 0.652  | ANGPT2, CEACAM1, CXCL12, CYP4F2, FLT1, ITGB1BP1, MCAM, NANOG, PDCD6, PROX1, SEMA6A, TGFB2, THBS1, VLDLR, WNT5A                                                                                                                                                                                                                                                                                                                                         | 15 |
| Nervous System Development and Function                                                                                                                                                | morphology of nervous system       | 2.01E-07   |  |        | ADAM10, ATRX, CLIC4, CREB1, CXCL12, CXCR4, EDNRA, ENTPD1, HSF2, IQGAP1, JAG1, LEPR, MBNL1, MBNL2, MECOM, NEFH, NFASC, PRKACB, RETREG1, S100A4, SLC26A4, SMAD5, TCF7L2, TGFB2, USH1C, UTRN, VLDLR, WNT5A                                                                                                                                                                                                                                                | 28 |
| Cancer, Organismal Injury and Abnormalities, Reproductive System Disease                                                                                                               | endometrial cancer                 | 2.01E-07   |  |        | ABCC9, ABHD6, ANGPT2, ATRX, CES2, CHN2, CPNE3, CXCL12, CYP4F2, CYP4F3, DPT, EDNRA, EIF2S1, ELF1, ENPEP, ENTPD1, FAM198B, FGL2, FHL1, FILIP1L, GRB10, HNRNPL, IQGAP1, JAG1, KCNMA1, KIF13A, MAP4K5, MAST4, MBNL1, MECOM, MUC5AC, NEFH, PDE4DIP, PROX1, RASAL2, RIOK3, S100A4, SENP7, SLC13A2, SRPX2, STAG2, TES, TG, THBS1, TNC, TPCN1, UBE3B, USH1C, UTRN, VDR, VLDLR, ZFR, ZFX, ZNF277, ZNF480                                                        | 55 |
| Cancer, Organismal Injury and Abnormalities, Skeletal and Muscular Disorders                                                                                                           | muscle tumor                       | 2.16E-07   |  |        | ANGPT2, CALCR, CALCRL, DPT, FERMT1, FLT1, IQGAP1, LTBP1, MUC5AC, NCOA2, OVGP1, PDE4DIP, PTGER2, RAB23, RAPGEF3, SLC22A18, SLC39A4, SMAD5, TAF13, TG, TNC, UTRN, VDR                                                                                                                                                                                                                                                                                    | 23 |
| Cardiovascular System Development and Function, Cellular Movement                                                                                                                      | chemotaxis of endothelial cells    | 0.00000022 |  | -0.765 | ADAM10, ANGPT2, CEACAM1, CXCL12, CXCR4, PROX1, THBS1                                                                                                                                                                                                                                                                                                                                                                                                   | 7  |
| Cancer, Organismal Injury and Abnormalities, Reproductive System Disease                                                                                                               | prostatic adenocarcinoma           | 2.25E-07   |  |        | ABCC9, ABO, ADAM10, ATRX, C4A/C4B, CALCR, CALCRL, CALU, CEACAM1, CES2, CPE, CREB1, EDIL3, EIF2S1, ENTPD1, FERMT1, FHL5, FILIP1L, FLT1, KCNMA1, LEPR, LYVE1, MAGI1, MAST4, MBNL2, ME2, MECOM, MIA2, MUC5AC, NEFH, NFASC, PDCD4, PDE4DIP, PRKACB, PROX1, RASAL2, RETREG1, RIOK3, SEMA4G, SEMA6A, SENP7, SLC26A4, SMAD5, SPAG5, SSBP2, STAG2, TG, THSD7A, TLK1, TNC, UBE3B, USH1C, UTRN, VLDLR, VPS13D, ZFY, ZNF277, ZNF711                               | 58 |
| Cancer, Organismal Injury and Abnormalities                                                                                                                                            | connective or soft tissue tumor    | 2.62E-07   |  | 1.121  | ANGPT2, ATRX, CALCR, CALCRL, CREB1, CXCL12, DPT, FERMT1, FLT1, IQGAP1, LEPR, LTBP1, MUC5AC, NCOA2, OVGP1, PDE4DIP, PTGER2, RAB23, RAPGEF3, S100A4, SLC22A18, SLC39A4, SMAD5, SSBP2, STAG2, TAF13, TG, THBS1, TNC, UTRN, VDR                                                                                                                                                                                                                            | 31 |
| Cancer, Organismal Injury and Abnormalities                                                                                                                                            | head and neck cancer               | 2.62E-07   |  |        | ABCC9, ABO, ADAM10, ADAMTS9, ALLC, AMY1C (includes others), ANGPT2, ATRX, CALCR, CES2, CREB1, CXCL12, CXCR4, DPT, EDIL3, ENPEP, FAM198B, FHL5, FLT1, MAGI1, MAP4K5, MECOM, MIA2, MUC5AC, NANOG, NEFH, NR1D2, OVGP1, PCM1, PDE4DIP, PRKACB, PROX1, S100A4, SEMA6A, SSBP2, STAG2, TAF13, TG, THBS1, THSD7A, TLK1, TM4SF1, TNC, UTRN, WNT5A, ZFX                                                                                                          | 46 |
| Cardiovascular System Development and Function, Cellular Development, Cellular Function and Maintenance, Cellular Growth and Proliferation, Organismal Development, Tissue Development | endothelial cell development       | 2.91E-07   |  | 0.667  | ANGPT2, CEACAM1, CLIC4, CXCL12, CYP4F2, FLT1, ITGB1BP1, MCAM, NANOG, PDCD6, PROX1, SEMA6A, TGFB2, THBS1, VLDLR, WNT5A                                                                                                                                                                                                                                                                                                                                  | 16 |
| Cancer, Organismal Injury and Abnormalities                                                                                                                                            | head and neck neoplasia            | 3.38E-07   |  |        | ABCC9, ABO, ADAM10, ADAMTS9, ALLC, AMY1C (includes others), ANGPT2, ATRX, CALCR, CES2, CREB1, CXCL12, CXCR4, DPT, EDIL3, ENOSF1, ENPEP, FAM198B, FGL2, FHL5, FILIP1L, FLT1, ID4, JAG1, LEPR, MAGI1, MAP4K5, ME2, MECOM, MIA2, MUC5AC, NANOG, NEFH, NR1D2, OVGP1, PCM1, PDCD6, PDE4DIP, PRKACB, PROX1, RASAL2, S100A4, SEMA6A, SLC2A1, SMAD5, SPTLC3, SSBP2, STAG2, SULT1C2, TAF13, TG, THBS1, THSD7A, TLK1, TM4SF1, TNC, UTRN, VDR, WNT5A, ZFX, ZNF480 | 61 |

Table G: Gene Functions Data Shown in Figure 6

|                                                                                    |                                            |          |  |        |                                                                                                                                                                                                                                                                                                                                                                                                                                                                                                                                                                                                                                                                                                                                                                                                                                                                                                    |     |
|------------------------------------------------------------------------------------|--------------------------------------------|----------|--|--------|----------------------------------------------------------------------------------------------------------------------------------------------------------------------------------------------------------------------------------------------------------------------------------------------------------------------------------------------------------------------------------------------------------------------------------------------------------------------------------------------------------------------------------------------------------------------------------------------------------------------------------------------------------------------------------------------------------------------------------------------------------------------------------------------------------------------------------------------------------------------------------------------------|-----|
| Cancer,Hematological Disease,Organismal Injury and Abnormalities                   | hematological neoplasia                    | 4.19E-07 |  | 0.946  | ABCC9,ADAM10,ADAMTS9,AMY1C (includes others),ANGPT2,ATRX,BAG2,C4A/C4B,CALCR,CALCRL,CXCL12,CXCR4,DPT,FERMT1,FILIP1L,FLT1,HIST1H2BK,HNF1B,ID4,IQGAP1,KCNMA1,LTBP1,MAG11,MAP4K5,MCAM,MECOM,MIA2,MLXIPL,MSMO1,MUC5AC,NCOA2,NFASC,PAMR1,PDCD4,PDE4DIP,PGGT1B,PLCL2,PRKACB,RASAL2,RSPH14,S100A4,SLC13A2,SMAD5,SSBP2,STAG2,TAF13,TCF7L2,TFRC,TGFB2,THBS1,TLK1,TNC,VPS13D,ZNF277,ZNF711                                                                                                                                                                                                                                                                                                                                                                                                                                                                                                                    | 54  |
| Cancer,Organismal Injury and Abnormalities                                         | carcinoma                                  | 4.49E-07 |  | -0.339 | ABCC9,ABHD6,ABO,ADAM10,ADAMTS9,ALDH6A1,ALLC,AMY1C (includes others),ANGPT2,ATRX,BAG2,C4A/C4B,CALCR,CALCRL,CALU,CDC40,CEACAM1,CES2,CHN2,CPE,CPNE3,CREB1,CXCL12,CXCR4,CYP4F2,CYP4F3,DLK1,DNAJB4,DPT,EDIL3,EDNRA,EFS,EIF2S1,ELF1,ENOSF1,ENPEP,ENTPD1,FAM198B,FAM216A,FERMT1,FGL2,FHL1,FHL5,FILIP1L,FLT1,GGH,GPX2,GRB10,HNF1B,HNRNPL,ID4,IQGAP1,JAG1,KCNMA1,KIF13A,LEPR,LHPP,LTBP1,LYVE1,MAG11,MAP4K5,MAST4,MBNL1,MBNL2,MCAM,MDFIC,ME2,MECOM,MIA2,MLXIPL,MUC5AC,NCOA2,NEFH,NFASC,NR1D2,NUPR1,OVGP1,PAMR1,PCM1,PDCD4,PDCD6,PDE4DIP,PGGT1B,PLCL2,PRKACB,PROX1,PROZ,PTGER2,RAB23,RAPGEF3,RASAL2,RETREG1,RIOK3,S100A4,SEMA4G,SEMA6A,SENP7,SLC13A2,SLC22A18,SLC26A4,SLC38A2,SLC39A4,SLCO2A1,SMAD5,SPAG5,SPTLC3,SRPX2,SSBP2,STAG2,SULT1C2,SYT1,TAF13,TCF7L2,TES,TFRC,TG,TGFB2,THBS1,THSD7A,TLK1,TM4SF1,TMX1,TNC,TPCN1,TSPAN5,TUBAL3,UBE3B,USH1C,UTRN,VDR,VLDLR,VPS13D,WNT5A,ZFR,ZFX,ZFY,ZNF277,ZNF480,ZNF711 | 139 |
| Cardiovascular System Development and Function                                     | morphology of vessel                       | 5.27E-07 |  |        | ANGPT2,CALCRL,CXCL12,CXCR4,EDNRA,FLT1,HNF1B,ITGB1BP1,JAG1,LTBP1,SMAD5,STK4,TGFB2,THBS1,VDR                                                                                                                                                                                                                                                                                                                                                                                                                                                                                                                                                                                                                                                                                                                                                                                                         | 15  |
| Cancer,Gastrointestinal Disease,Organismal Injury and Abnormalities                | digestive organ tumor                      | 5.39E-07 |  | 0.353  | ABCC9,ABO,ADAM10,ADAMTS9,ALDH6A1,ALLC,ANGPT2,ATRX,BAG2,CALCR,CALCRL,CALU,CDC40,CEACAM1,CES2,CHN2,CPE,CPNE3,CREB1,CXCL12,CXCR4,CYP4F2,DLK1,DNAJB4,DPT,EDIL3,EDNRA,EFS,ELF1,EMP1,ENOSF1,ENPEP,ENTPD1,FAM198B,FAM216A,FERMT1,FGL2,FHL1,FHL5,FILIP1L,FLT1,GGH,GPX2,GRB10,HNRNPL,ID4,IQGAP1,ITGB1BP1,JAG1,KCNMA1,KIF13A,LEPR,LHPP,LTBP1,LYVE1,MAG11,MAP4K5,MAST4,MBNL1,MBNL2,MCAM,MDFIC,ME2,MECOM,MIA2,MLXIPL,MUC5AC,NCOA2,NEFH,NFASC,NR1D2,NUPR1,OVGP1,PAMR1,PCM1,PDCD4,PDE4DIP,PGGT1B,PLCL2,PRKACB,PROX1,PROZ,RAB23,RAPGEF3,RASAL2,RIOK3,S100A4,SEMA4G,SEMA6A,SENP7,SLC13A2,SLC22A18,SLC26A4,SLC38A2,SLC39A4,SLCO2A1,SPAG5,SPTLC3,SRPX2,SSBP2,STAG2,STK4,SULT1C2,SYT1,TAF13,TCF7L2,TES,TFRC,TG,TGFB2,THBS1,THSD7A,TLK1,TM4SF1,TMX1,TNC,TPCN1,TSPAN5,TUBAL3,UBE3B,USH1C,UTRN,VDR,VLDLR,VPS13D,WNT5A,ZFR,ZFX,ZFY,ZNF277,ZNF480,ZNF711                                                                   | 132 |
| Cancer,Neurological Disease,Organismal Injury and Abnormalities                    | central nervous system solid tumor         | 5.78E-07 |  | -1.342 | ALLC,ANGPT2,ATRX,CXCL12,CXCR4,DLK1,DPT,FLT1,JAG1,KCNMA1,LHPP,MAP4K5,MECOM,MUC5AC,NANOG,NEFH,PDE4DIP,RSPH14,S100A4,SMAD5,SPTLC3,STAG2,SULT1C2,TAF13,TCF7L2,TGFB2,THBS1,TNC,USH1C,WNT5A,ZFX,ZNF480                                                                                                                                                                                                                                                                                                                                                                                                                                                                                                                                                                                                                                                                                                   | 32  |
| Cellular Development,Connective Tissue Development and Function,Tissue Development | differentiation of connective tissue cells | 6.32E-07 |  | -1.326 | ALDH6A1,CALCR,CEACAM1,CREB1,DLK1,EDNRA,ID4,JAG1,MECOM,PLCL2,PTGER2,RAB23,RAPGEF3,SMAD5,STK4,TCF7L2,TFRC,TGFB2,TNC,TPM4,VDR,WNT5A                                                                                                                                                                                                                                                                                                                                                                                                                                                                                                                                                                                                                                                                                                                                                                   | 22  |
| Cardiovascular System Development and Function                                     | morphology of vasculature                  | 6.65E-07 |  |        | ANGPT2,CALCRL,CLIC4,CREB1,CXCL12,CXCR4,DLK1,EDNRA,FLT1,ITGB1BP1,LTBP1,SMAD5,STK4,TGFB2,THBS1,VDR                                                                                                                                                                                                                                                                                                                                                                                                                                                                                                                                                                                                                                                                                                                                                                                                   | 16  |
| Cancer,Organismal Injury and Abnormalities                                         | neoplasia of cells                         | 6.94E-07 |  | -1.204 | ABCC9,ABO,ADAM10,ADAMTS9,ALLC,ANGPT2,ATRX,CALCR,CEACAM1,CES2,CHN2,CREB1,CXCL12,CXCR4,CYP4F3,DNAJB4,DPT,EDIL3,ENOSF1,ENPEP,FAM198B,FERMT1,FGL2,FHL5,FILIP1L,GPX2,GRB10,JAG1,KCNMA1,LEPR,MAG11,MAST4,MBNL1,MBNL2,MCAM,ME2,MECOM,MIA2,MUC5AC,NANOG,NEFH,NR1D2,NUPR1,OVGP1,PCM1,PDCD4,PDE4DIP,PROX1,PTGER2,RASAL2,RETREG1,S100A4,SEMA4G,SEMA6A,SLCO2A1,SSBP2,STAG2,TCF7L2,TG,THBS1,THSD7A,TM4SF1,TNC,USH1C,UTRN,WNT5A,ZNF711                                                                                                                                                                                                                                                                                                                                                                                                                                                                           | 67  |

Table G: Gene Functions Data Shown in Figure 6

|                                                                                                                                                |                                          |            |  |        |                                                                                                                                                                                                                                                                                                                                                                                                                                                                                                                                                                                                                                                                                                                                                                                                                            |     |
|------------------------------------------------------------------------------------------------------------------------------------------------|------------------------------------------|------------|--|--------|----------------------------------------------------------------------------------------------------------------------------------------------------------------------------------------------------------------------------------------------------------------------------------------------------------------------------------------------------------------------------------------------------------------------------------------------------------------------------------------------------------------------------------------------------------------------------------------------------------------------------------------------------------------------------------------------------------------------------------------------------------------------------------------------------------------------------|-----|
| Digestive System Development and Function,Gastrointestinal Disease,Organ Morphology,Organismal Development,Organismal Injury and Abnormalities | abnormal morphology of colon             | 8.21E-07   |  |        | CEACAM1,FERMT1,TCF7L2,USH1C,VDR,WNT5A                                                                                                                                                                                                                                                                                                                                                                                                                                                                                                                                                                                                                                                                                                                                                                                      | 6   |
| Cancer,Gastrointestinal Disease,Organismal Injury and Abnormalities                                                                            | digestive system cancer                  | 8.56E-07   |  | 0.503  | ABCC9,ABO,ADAM10,ADAMTS9,ALDH6A1,ALLC,ANGPT2,ATRX,BAG2,CALCR,CALCRL,CALU,CDC40,CEACAM1,CES2,CHN2,CPE,CPNE3,CREB1,CXCL12,CXCR4,CYP4F2,DLK1,DNAJB4,DPT,EDIL3,EDNR A,EFS,ELF1,EMP1,ENOSF1,ENPEP,ENTPD1,FAM198B,FAM216A,FERMT1,FHL1,FHL5,FILIP1L,FLT1,G GH,GPX2,GRB10,HNRNPL,ID4,IQGAP1,JAG1,KCNMA1,KIF13A,LEPR,LHPP,LTBP1,LYVE1,MAGI1,MAP 4K5,MAST4,MBNL1,MBNL2,MCAM,MDFIC,ME2,MECOM,MIA2,MLXIPL,MUC5AC,NCOA2,NEFH,NFASC, NR1D2,NUPR1,OVGP1,PAMR1,PCM1,PDCD4,PDE4DIP,PGGT1B,PLCL2,PRKACB,PROX1,PROZ,RAB2 3,RAPGEF3,RASAL2,RIOK3,S100A4,SEMA4G,SEMA6A,SENP7,SLC13A2,SLC22A18,SLC26A4,SLC38A 2,SLC39A4,SLCO2A1,SPAG5,SPTLC3,SRPX2,SSBP2,STAG2,STK4,SULT1C2,SYT1,TAF13,TCF7L2,TE S,TFRC,TG,TGFB2,THBS1,THSD7A,TLK1,TM4SF1,TMX1,TNC,TPCN1,TSPAN5,TUBAL3,UBE3B,USH1C ,UTRN,VDR,VLDLR,VPS13D,WNT5A,ZFR,ZFX,ZFY,ZNF277,ZNF480,ZNF711 | 130 |
| Cancer,Organismal Injury and Abnormalities                                                                                                     | metastasis                               | 9.07E-07   |  | -1.897 | ADAM10,ANGPT2,C4A/C4B,CREB1,CXCL12,CXCR4,EDNRA,EFS,EMP1,FLT1,JAG1,MAGI1,MAP4K5,MCAM,NANOG,PDCD4,PROX1,PTGER2,S100A4,TCF7L2,TGFB2,THBS1,TM4SF1,TNC,VDR,WNT5A                                                                                                                                                                                                                                                                                                                                                                                                                                                                                                                                                                                                                                                                | 26  |
| Cancer,Hematological Disease,Immunological Disease,Organismal Injury and Abnormalities                                                         | lymphoproliferative malignancy           | 0.00000101 |  | 1.757  | ABCC9,ADAM10,ADAMTS9,AMY1C (includes others),ANGPT2,ATRX,BAG2,C4A/C4B,CALCRL,CXCL12,CXCR4,DPT,FERMT1,FILIP1L,FLT1,HIST1H2BK,HNF1B,ID4,IQGAP1,LTBP1,MAGI1,MAP4K5,MCAM,MECOM,MIA2,MLXIPL,MSMO1,MUC5AC,NCOA2,NFASC,PAMR1,PDCD4,PDE4DIP,PLCL2,RASAL2,RSPH14,S100A4,SLC13A2,SMAD5,SSBP2,STAG2,TAF13,TGFB2,THBS1,TLK1,TNC,VPS13D,ZNF277,ZNF711                                                                                                                                                                                                                                                                                                                                                                                                                                                                                   | 49  |
| Cancer,Organismal Injury and Abnormalities,Reproductive System Disease                                                                         | female genital tract adenocarcinoma      | 0.00000123 |  |        | ABCC9,ABHD6,ANGPT2,ATRX,C4A/C4B,CES2,CHN2,CPE,CPNE3,CXCL12,CYP4F2,CYP4F3,DPT,EDNRA,EIF2S1,ELF1,ENPEP,ENTPD1,FAM198B,FGL2,FILIP1L,FLT1,GRB10,HNRNPL,IQGAP1,JAG1,KCNMA1,KIF13A,MAP4K5,MAST4,MBNL1,MCAM,MECOM,MUC5AC,NEFH,PDE4DIP,PROX1,PTGER2,RASAL2,RIOK3,SENP7,SLC13A2,SLC22A18,SLC39A4,SRPX2,STAG2,TES,TG,THBS1,TM4SF1,TNC,TPCN1,TUBAL3,UBE3B,USH1C,UTRN,VDR,VLDLR,ZFR,ZFX,ZNF277,ZNF480                                                                                                                                                                                                                                                                                                                                                                                                                                  | 62  |
| Cardiovascular System Development and Function,Embryonic Development,Organ Development,Organismal Development,Tissue Development               | cardiogenesis                            | 0.00000123 |  |        | CALCRL,CREB1,CXCL12,CXCR4,EDNRA,EMP1,FHL1,FILIP1L,JAG1,LTBP1,MECOM,PROX1,RAPGEF3,SMAD5,STK4,TGFB2,THBS1,UTRN,WNT5A                                                                                                                                                                                                                                                                                                                                                                                                                                                                                                                                                                                                                                                                                                         | 19  |
| Cellular Movement                                                                                                                              | cell movement of tumor cell lines        | 0.00000126 |  | -1.777 | ADAM10,ANGPT2,CALU,CEACAM1,CHN2,CPNE3,CXCL12,CXCR4,DNAJB4,FLT1,IQGAP1,LEPR,LYVE1,MAGI1,MCAM,NCOA2,PDCD4,RAPGEF3,S100A4,SENP7,SMAD5,SRPX2,TCF7L2,TGFB2,THBS1,TNC,WNT5A                                                                                                                                                                                                                                                                                                                                                                                                                                                                                                                                                                                                                                                      | 27  |
| Cellular Movement                                                                                                                              | cell movement of connective tissue cells | 0.00000144 |  | -0.861 | ANGPT2,CALCRL,CXCL12,CXCR4,DPT,ITGB1BP1,KCNMA1,PGGT1B,RAPGEF3,THBS1,UTRN,WNT5A                                                                                                                                                                                                                                                                                                                                                                                                                                                                                                                                                                                                                                                                                                                                             | 12  |
| Cellular Movement                                                                                                                              | invasion of hybrid cells                 | 0.00000146 |  |        | CEACAM1,CXCL12,CXCR4                                                                                                                                                                                                                                                                                                                                                                                                                                                                                                                                                                                                                                                                                                                                                                                                       | 3   |

Table G: Gene Functions Data Shown in Figure 6

|                                                                                    |                                              |            |  |        |                                                                                                                                                                                                                                                                                                                                                                                                                                                                                                                                                                                                                                                                       |     |
|------------------------------------------------------------------------------------|----------------------------------------------|------------|--|--------|-----------------------------------------------------------------------------------------------------------------------------------------------------------------------------------------------------------------------------------------------------------------------------------------------------------------------------------------------------------------------------------------------------------------------------------------------------------------------------------------------------------------------------------------------------------------------------------------------------------------------------------------------------------------------|-----|
| Cancer,Organismal Injury and Abnormalities                                         | tumorigenesis of epithelial neoplasm         | 0.00000148 |  | -0.063 | ABCC9,ABHD6,ADAM10,ADAMTS9,ALDH6A1,ALLC,ANGPT2,ATRX,C4A/C4B,CALCR,CALCRL,CEACAM1,CES2,CHN2,CPE,CPNE3,CXCL12,CYP4F2,CYP4F3,DLK1,DPT,EDIL3,EIF2S1,ELF1,ENPEP,FAM198B,FAM216A,FERMT1,FHL1,FILIP1L,FLT1,GPX2,GRB10,HNF1B,HNRNPL,ID4,IQGAP1,JAG1,KCNMA1,KIF13A,LEPR,LTBP1,MAGI1,MAP4K5,MAST4,MBNL1,MBNL2,MCAM,MECOM,MIA2,MLXIPL,MUC5AC,NCOA2,NEFH,NFASC,NR1D2,OVGP1,PCM1,PDE4DIP,PGGT1B,PROX1,PTGER2,RAPGEF3,RASAL2,RIOK3,SEMA4G,SEMA6A,SENP7,SLC13A2,SLC22A18,SLC26A4,SLC38A2,SLC39A4,SPTLC3,SRPX2,SSBP2,STAG2,SULT1C2,SYT1,TAF13,TCF7L2,TES,TFRC,TG,THBS1,THSD7A,TM4SF1,TNC,TPCN1,TSPAN5,TUBAL3,UBE3B,USH1C,UTRN,VDR,VLDLR,VPS13D,WNT5A,ZFR,ZFX,ZFY,ZNF277,ZNF480,ZNF711 | 104 |
| Cancer,Organismal Injury and Abnormalities                                         | breast or colorectal cancer                  | 0.00000158 |  |        | ABCC9,ABO,ADAM10,ADAMTS9,ALDH6A1,ALLC,ANGPT2,ATRX,CALCR,CEACAM1,CES2,CPE,CXCL12,CXCR4,CYP4F2,DPT,EDIL3,EFS,ELF1,EMP1,ENPEP,FAM198B,FAM216A,FERMT1,FHL1,FLT1,GGH,GPX2,HNRNPL,JAG1,KCNMA1,KIF13A,LEPR,LTBP1,LYVE1,MAGI1,MAP4K5,MAST4,MBNL1,MCAM,MECOM,MIA2,MLXIPL,MUC5AC,NCOA2,NEFH,NFASC,NR1D2,OVGP1,PCM1,PDCD4,PDCD6,PDE4DIP,PGGT1B,PROX1,RAPGEF3,RASAL2,RIOK3,S100A4,SEMA4G,SEMA6A,SENP7,SLC13A2,SLC22A18,SLC38A2,SLC39A4,SSBP2,STAG2,STK4,SULT1C2,SYT1,TCF7L2,TES,TFRC,TG,TGFB2,THBS1,TM4SF1,TNC,TUBAL3,UTRN,VDR,VLDLR,VPS13D,WNT5A,ZFR,ZFX,ZFY,ZNF480,ZNF711                                                                                                       | 90  |
| Cell Death and Survival                                                            | cell survival                                | 0.00000158 |  | -1.246 | ANGPT2,ATRX,CALCR,CDC40,CEACAM1,CREB1,CXCL12,CXCR4,DLK1,EIF2S1,ELF1,EMP1,FLT1,GRB10,HNF1B,HSF2,ID4,IQGAP1,ITGB1BP1,JAG1,LEPR,MCAM,MECOM,NEFH,NUPR1,PDCD4,PRKACB,RAPGEF3,S100A4,SEMA6A,TANK,TGFB2,THBS1,VDR,WNT5A                                                                                                                                                                                                                                                                                                                                                                                                                                                      | 35  |
| Organismal Injury and Abnormalities,Reproductive System Disease                    | benign pelvic disease                        | 0.00000168 |  |        | ANGPT2,CALCRL,CREB1,CXCR4,DPT,FLT1,IQGAP1,LEPR,LTBP1,OVGP1,PRKACB,PTGER2,RAB23,RAPGEF3,SMAD5,TAF13,TGFB2,TNC,UTRN,VDR                                                                                                                                                                                                                                                                                                                                                                                                                                                                                                                                                 | 20  |
| Cellular Development,Connective Tissue Development and Function,Tissue Development | differentiation of bone cells                | 0.00000174 |  | -1.689 | CALCR,CEACAM1,CREB1,DLK1,EDNRA,ID4,JAG1,PLCL2,PTGER2,RAPGEF3,SMAD5,TFRC,TGFB2,TNC,TPM4,WNT5A                                                                                                                                                                                                                                                                                                                                                                                                                                                                                                                                                                          | 16  |
| Cancer,Organismal Injury and Abnormalities                                         | advanced malignant solid tumor               | 0.00000208 |  | -0.369 | ANGPT2,C4A/C4B,CXCL12,CXCR4,EFS,EMP1,ENPEP,FLT1,JAG1,KCNMA1,MAGI1,MAP4K5,MCAM,MECOM,S100A4,SLC39A4,TGFB2,THBS1,TM4SF1,TNC,VDR,WNT5A                                                                                                                                                                                                                                                                                                                                                                                                                                                                                                                                   | 22  |
| Cardiovascular Disease,Cardiovascular System Development and Function              | abnormal morphology of cardiovascular system | 0.0000022  |  |        | ADAM10,ADAMTS9,CALCRL,CLIC4,CXCL12,CXCR4,EDNRA,FLT1,JAG1,LTBP1,MBNL1,MBNL2,MECOM,SLCO2A1,SMAD5,STK4,TFRC,TGFB2,THBS1                                                                                                                                                                                                                                                                                                                                                                                                                                                                                                                                                  | 19  |
| Cancer,Hematological Disease,Organismal Injury and Abnormalities                   | lymphoid cancer                              | 0.00000225 |  | 1.591  | ABCC9,ADAMTS9,AMY1C (includes others),ANGPT2,ATRX,BAG2,C4A/C4B,CALCRL,CXCL12,CXCR4,DPT,FERMT1,FILIP1L,FLT1,HIST1H2BK,HNF1B,ID4,IQGAP1,LTBP1,MAGI1,MAP4K5,MCAM,MECOM,MIA2,MLXIPL,MSMO1,MUC5AC,NCOA2,NFASC,PAMR1,PDCD4,PDE4DIP,PLCL2,PRKACB,RASAL2,RSPH14,S100A4,SLC13A2,SMAD5,SSBP2,STAG2,TAF13,TFRC,TGFB2,THBS1,TLK1,TNC,VPS13D,ZNF277,ZNF711                                                                                                                                                                                                                                                                                                                         | 50  |
| Cancer,Organismal Injury and Abnormalities,Skeletal and Muscular Disorders         | leiomyomatosis                               | 0.0000024  |  |        | ANGPT2,CALCRL,DPT,IQGAP1,LTBP1,PTGER2,RAB23,RAPGEF3,SMAD5,TAF13,TNC,UTRN,VDR                                                                                                                                                                                                                                                                                                                                                                                                                                                                                                                                                                                          | 13  |
| Cellular Development,Cellular Growth and Proliferation                             | cell proliferation of tumor cell lines       | 0.00000242 |  | 0.342  | ADAM10,ANGPT2,CEACAM1,CES2,CHN2,CREB1,CXCL12,CXCR4,DLK1,DNAJB4,EMP1,ENTPD1,FLT1,HNF1B,IQGAP1,JAG1,KIF13A,MAGI1,MECOM,NANOG,NCOA2,PDCD4,PRKACB,PROX1,PTGER2,S100A4,SMAD5,STAG2,STK4,TCF7L2,TES,TFRC,TGFB2,THBS1,TNC,UTRN,VDR,WNT5A                                                                                                                                                                                                                                                                                                                                                                                                                                     | 38  |

Table G: Gene Functions Data Shown in Figure 6

|                                                                                                                           |                                  |            |  |        |                                                                                                                                                                                                                                                                                                                                                                                                                                                                                                                                                                                                                                                                        |     |
|---------------------------------------------------------------------------------------------------------------------------|----------------------------------|------------|--|--------|------------------------------------------------------------------------------------------------------------------------------------------------------------------------------------------------------------------------------------------------------------------------------------------------------------------------------------------------------------------------------------------------------------------------------------------------------------------------------------------------------------------------------------------------------------------------------------------------------------------------------------------------------------------------|-----|
| Cancer,Organismal Injury and Abnormalities                                                                                | tumorigenesis of malignant tumor | 0.00000242 |  | -0.493 | ABCC9,ABHD6,ADAM10,ADAMTS9,ALDH6A1,ALLC,ANGPT2,ATRX,C4A/C4B,CALCR,CALCRL,CEACAM1,CES2,CHN2,CPE,CPNE3,CXCL12,CXCR4,CYP4F2,CYP4F3,DLK1,EDIL3,EIF2S1,ELF1,ENPEP,FAM198B,FAM216A,FERMT1,FHL1,FILIP1L,FLT1,GPX2,GRB10,HNF1B,HNRNPL,IQGAP1,JAG1,KCNMA1,KIF13A,LEPR,LTBP1,MAGI1,MAP4K5,MAST4,MBNL1,MBNL2,MCAM,MECOM,MIA2,MLXIPL,MUC5AC,NCOA2,NEFH,NFASC,NR1D2,OVGP1,PCM1,PDE4DIP,PGGT1B,PROX1,PTGER2,RAPGEF3,RASAL2,RIOK3,SEMA4G,SEMA6A,SENP7,SLC13A2,SLC22A18,SLC26A4,SLC38A2,SLC39A4,SPTLC3,SRPX2,SSBP2,STAG2,SULT1C2,SYT1,TCF7L2,TES,TFRC,TG,TGFB2,THBS1,THSD7A,TM4SF1,TNC,TPCN1,TSPAN5,TUBAL3,UBE3B,USH1C,UTRN,VDR,VLDLR,VPS13D,WNT5A,ZFR,ZFX,ZFY,ZNF277,ZNF480,ZNF711    | 103 |
| Cancer,Organismal Injury and Abnormalities                                                                                | melanoma                         | 0.00000272 |  |        | ABCC9,ABHD6,ABO,ADAM10,ADAMTS9,ALDH6A1,ALLC,ATRX,C4A/C4B,CALCR,CALCRL,CALU,CEACAM1,CES2,CHN2,CPE,CPNE3,CYP4F2,CYP4F3,DLK1,EDIL3,EDNRA,EFS,ELF1,ENPEP,ENTPD1,FAM198B,FAM216A,FERMT1,FGL2,FHL1,FHL5,FILIP1L,FLT1,HNRNPL,HSF2,IQGAP1,JAG1,KCNMA1,KIF13A,LEPR,LTBP1,MAGI1,MAP4K5,MAST4,MBNL1,MCAM,MECOM,MIA2,MLXIPL,MUC5AC,NANOG,NCOA2,NEFH,NFASC,OVGP1,PAMR1,PDCC6,PDE4DIP,PLCL2,PRKACB,PROX1,PROZ,PTGER2,RAPGEF3,RASAL2,RIOK3,S100A4,SEMA4G,SENP7,SLC13A2,SLC22A18,SLC26A4,SLC39A4,SLCO2A1,SPAG5,SPTLC3,STK4,SULT1C2,SYT1,TAF13,TCF7L2,TES,TFRC,TG,TGFB2,THBS1,THSD7A,TLK1,TM4SF1,TNC,TPCN1,TSPAN5,TUBAL3,USH1C,UTRN,VDR,VLDLR,VPS13D,WNT5A,ZFR,ZFX,ZNF277,ZNF480,ZNF711 | 105 |
| Cancer,Organismal Injury and Abnormalities                                                                                | cancer of head                   | 0.00000291 |  |        | ADAM10,ANGPT2,CXCL12,DPT,EDIL3,ENPEP,FLT1,MAP4K5,NANOG,PRKACB,SSBP2,THBS1,TLK1,TM4SF1,TNC,ZFX                                                                                                                                                                                                                                                                                                                                                                                                                                                                                                                                                                          | 16  |
| Cancer,Organismal Injury and Abnormalities,Skeletal and Muscular Disorders                                                | smooth muscle tumor              | 0.00000295 |  |        | ANGPT2,CALCRL,DPT,FLT1,IQGAP1,LTBP1,PTGER2,RAB23,RAPGEF3,SMAD5,TAF13,TNC,UTRN,VDR                                                                                                                                                                                                                                                                                                                                                                                                                                                                                                                                                                                      | 14  |
| Cancer,Gastrointestinal Disease,Organismal Injury and Abnormalities                                                       | colorectal neoplasia             | 0.00000303 |  |        | ADAM10,ADAMTS9,ALDH6A1,ALLC,ANGPT2,ATRX,CALCR,CEACAM1,CES2,CXCL12,CYP4F2,DPT,EDIL3,EFS,ELF1,EMP1,ENPEP,FAM198B,FAM216A,FERMT1,FHL1,FLT1,GGH,GPX2,HNRNPL,JAG1,KCNMA1,KIF13A,LEPR,LTBP1,MAGI1,MAP4K5,MAST4,MBNL1,MCAM,MECOM,MIA2,MLXIPL,MUC5AC,NCOA2,NEFH,NFASC,NR1D2,OVGP1,PCM1,PDCC4,PDE4DIP,PGGT1B,RAPGEF3,RASAL2,RIOK3,S100A4,SEMA4G,SEMA6A,SENP7,SLC13A2,SLC38A2,SLC39A4,SSBP2,STAG2,STK4,SULT1C2,SYT1,TCF7L2,TES,TFRC,TG,TGFB2,THBS1,THSD7A,TM4SF1,TNC,TUBAL3,UTRN,VDR,VPS13D,WNT5A,ZFR,ZFX,ZFY,ZNF480,ZNF711                                                                                                                                                      | 82  |
| Cancer,Gastrointestinal Disease,Organismal Injury and Abnormalities                                                       | colorectal cancer                | 0.00000318 |  |        | ADAM10,ADAMTS9,ALDH6A1,ALLC,ANGPT2,ATRX,CALCR,CEACAM1,CES2,CXCL12,CYP4F2,DPT,EDIL3,EFS,ELF1,EMP1,ENPEP,FAM198B,FAM216A,FERMT1,FHL1,FLT1,GGH,GPX2,HNRNPL,JAG1,KCNMA1,KIF13A,LEPR,LTBP1,MAGI1,MAP4K5,MAST4,MBNL1,MCAM,MECOM,MIA2,MLXIPL,MUC5AC,NCOA2,NEFH,NFASC,NR1D2,OVGP1,PCM1,PDCC4,PDE4DIP,PGGT1B,RAPGEF3,RASAL2,RIOK3,S100A4,SEMA4G,SEMA6A,SENP7,SLC13A2,SLC38A2,SLC39A4,SSBP2,STAG2,STK4,SULT1C2,SYT1,TCF7L2,TES,TFRC,TG,TGFB2,THBS1,TM4SF1,TNC,TUBAL3,UTRN,VDR,VPS13D,WNT5A,ZFR,ZFX,ZFY,ZNF480,ZNF711                                                                                                                                                             | 81  |
| Cellular Function and Maintenance                                                                                         | cellular homeostasis             | 0.0000032  |  | -1.693 | ABCC9,ADAM10,ANGPT2,C4A/C4B,CALCR,CEACAM1,CLIC4,CPE,CREB1,CXCL12,CXCR4,EDNRA,EIF2S1,ELF1,ENTPD1,FLT1,GABPA,HNRNPL,JAG1,KCNMA1,LEPR,LTBP1,MCAM,MECOM,MLXIPL,NUPR1,PLCL2,PTGER2,RAPGEF3,SLC26A4,SLC39A4,TCF7L2,TFRC,TG,TPCN1,VDR,WNT5A                                                                                                                                                                                                                                                                                                                                                                                                                                   | 37  |
| Cancer,Hematological Disease,Organismal Injury and Abnormalities                                                          | hematologic cancer               | 0.00000368 |  | 1.757  | ABCC9,ADAM10,ADAMTS9,AMY1C (includes others),ANGPT2,ATRX,BAG2,C4A/C4B,CALCRL,CXCL12,CXCR4,DPT,FERMT1,FILIP1L,FLT1,HIST1H2BK,HNF1B,ID4,IQGAP1,LTBP1,MAGI1,MAP4K5,MCAM,MECOM,MIA2,MLXIPL,MSMO1,MUC5AC,NCOA2,NFASC,PAMR1,PDCC4,PDE4DIP,PLCL2,PRKACB,RASAL2,RSPH14,S100A4,SLC13A2,SMAD5,SSBP2,STAG2,TAF13,TFRC,TGFB2,THBS1,TLK1,TNC,VPS13D,ZNF277,ZNF711                                                                                                                                                                                                                                                                                                                   | 51  |
| Embryonic Development,Nervous System Development and Function,Organ Development,Organismal Development,Tissue Development | formation of brain               | 0.00000405 |  | -0.836 | ADAM10,ATRX,CREB1,CXCL12,CXCR4,HNF1B,ID4,MECOM,NEFH,PROX1,RAPGEF3,S100A4,SMAD5,TG,THBS1,TNC,VLDLR,WNT5A                                                                                                                                                                                                                                                                                                                                                                                                                                                                                                                                                                | 18  |

Table G: Gene Functions Data Shown in Figure 6

|                                                                                     |                               |            |  |       |                                                                                                                                                                                                                                                                                                                                                                                                                                                                                                                                                                                                                                                                                                                                                                                                                       |     |
|-------------------------------------------------------------------------------------|-------------------------------|------------|--|-------|-----------------------------------------------------------------------------------------------------------------------------------------------------------------------------------------------------------------------------------------------------------------------------------------------------------------------------------------------------------------------------------------------------------------------------------------------------------------------------------------------------------------------------------------------------------------------------------------------------------------------------------------------------------------------------------------------------------------------------------------------------------------------------------------------------------------------|-----|
| Cellular Movement                                                                   | migration of tumor cell lines | 0.00000417 |  | -1.64 | ADAM10,ANGPT2,CALU,CEACAM1,CHN2,CPNE3,CXCL12,CXCR4,IQGAP1,LEPR,LYVE1,MAGI1,MCAM,NCOA2,PDCD4,RAPGEF3,S100A4,SMAD5,SRPX2,TCF7L2,THBS1,TNC,WNT5A                                                                                                                                                                                                                                                                                                                                                                                                                                                                                                                                                                                                                                                                         | 23  |
| Cancer,Organismal Injury and Abnormalities                                          | adenocarcinoma                | 0.00000431 |  | 0.588 | ABCC9,ABHD6,ABO,ADAM10,ADAMTS9,ALDH6A1,ALLC,ANGPT2,ATRX,C4A/C4B,CALCR,CALCRL,CALU,CDC40,CEACAM1,CES2,CHN2,CPE,CPNE3,CREB1,CXCL12,CXCR4,CYP4F2,CYP4F3,DLK1,DNAJB4,DPT,EDIL3,EDNRA,EIF2S1,ELF1,ENOSF1,ENPEP,ENTPD1,FAM198B,FAM216A,FERMT1,FGL2,FHL1,FHL5,FILIP1L,FLT1,GGH,GRB10,HNF1B,HNRNPL,IQGAP1,JAG1,KCNMA1,KIF13A,LEPR,LHPP,LTBP1,LYVE1,MAGI1,MAP4K5,MAST4,MBNL1,MBNL2,MCAM,ME2,MECOM,MIA2,MLXIPL,MUC5AC,NCOA2,NEFH,NFASC,NR1D2,OVGP1,PAMR1,PCM1,PDCD4,PDE4DIP,PGGT1B,PLCL2,PRKACB,PROX1,PTGER2,RAPGEF3,RASAL2,RETREG1,RIOK3,S100A4,SEMA4G,SEMA6A,SENP7,SLC13A2,SLC22A18,SLC26A4,SLC38A2,SLC39A4,SLCO2A1,SMAD5,SPAG5,SPTLC3,SRPX2,SSBP2,STAG2,SULT1C2,SYT1,TCF7L2,TES,TFRC,TG,TGFB2,THBS1,THSD7A,TLK1,TM4SF1,TMX1,TNC,TPCN1,TSPAN5,TUBAL3,UBE3B,USH1C,UTRN,VDR,VLDLR,VPS13D,WNT5A,ZFR,ZFX,ZFY,ZNF277,ZNF480,ZNF711 | 128 |
| Cancer,Organismal Injury and Abnormalities                                          | solid tumor of head and neck  | 0.00000442 |  |       | ABCC9,ABO,ADAM10,ALLC,AMY1C (includes others),ANGPT2,ATRX,CALCR,CES2,CREB1,CXCL12,CXCR4,DPT,EDIL3,ENPEP,FAM198B,FHL5,FLT1,MAGI1,MECOM,MIA2,MUC5AC,NEFH,NR1D2,OVGP1,PCM1,PDE4DIP,PRKACB,PROX1,S100A4,SEMA6A,SSBP2,STAG2,TG,THBS1,THSD7A,TLK1,TM4SF1,TNC,WNT5A                                                                                                                                                                                                                                                                                                                                                                                                                                                                                                                                                          | 40  |
| Cancer,Organismal Injury and Abnormalities                                          | papillary adenocarcinoma      | 0.00000464 |  |       | C4A/C4B,CES2,CREB1,CXCR4,ENPEP,FLT1,MCAM,PCM1,SLC39A4,TG,THBS1,WNT5A                                                                                                                                                                                                                                                                                                                                                                                                                                                                                                                                                                                                                                                                                                                                                  | 12  |
| Cell Morphology                                                                     | morphology of cells           | 0.00000485 |  |       | ADAM10,ANGPT2,ATRX,CLIC4,CREB1,CXCL12,CXCR4,DLK1,DPT,EDNRA,EMP1,FHL1,FHL5,FLT1,GABPA,HSF2,IQGAP1,KCNMA1,LEPR,MBNL1,MBNL2,MECOM,MUC5AC,NCOA2,NEFH,NFASC,PGGT1B,PTGER2,RAPGEF3,RETREG1,S100A4,SLC26A4,SMAD5,STK4,TCF7L2,TFRC,TG,TGFB2,THBS1,TNC,USH1C,UTRN,VDR,VLDLR,WNT5A                                                                                                                                                                                                                                                                                                                                                                                                                                                                                                                                              | 45  |
| Gastrointestinal Disease,Hepatic System Disease,Organismal Injury and Abnormalities | liver lesion                  | 0.000005   |  | 0.705 | ABCC9,ABHD6,ANGPT2,ATRX,BAG2,C4A/C4B,CALCRL,CALU,CDC40,CEACAM1,CES2,CHN2,CPNE3,CREB1,CXCL12,CXCR4,DLK1,DPT,EDIL3,EDNRA,EFS,ENTPD1,FERMT1,FGL2,FHL1,FLT1,GPX2,GRB10,ID4,IQGAP1,JAG1,KCNMA1,LEPR,LYVE1,MAST4,MDFIC,ME2,MECOM,MIA2,MLXIPL,MUC5AC,NCOA2,NUPR1,OVGP1,PAMR1,PDE4DIP,PLCL2,PROX1,PROZ,RAB23,RAPGEF3,RASAL2,RIOK3,S100A4,SEMA6A,SLC26A4,SLC38A2,SLC39A4,SRPX2,STAG2,STK4,TANK,TCF7L2,TFRC,TG,TGFB2,THBS1,TLK1,TPCN1,UBE3B,USH1C,UTRN,VDR,VLDLR,VPS13D,ZFR,ZNF277                                                                                                                                                                                                                                                                                                                                              | 77  |
| Cancer,Endocrine System Disorders,Organismal Injury and Abnormalities               | thyroid cancer                | 0.00000512 |  |       | AMY1C (includes others),ANGPT2,CES2,CREB1,CXCR4,FLT1,MIA2,NEFH,PCM1,PDE4DIP,TAF13,TG,THBS1,UTRN,WNT5A                                                                                                                                                                                                                                                                                                                                                                                                                                                                                                                                                                                                                                                                                                                 | 15  |
| Cancer,Organismal Injury and Abnormalities                                          | abdominal carcinoma           | 0.00000555 |  |       | ABCC9,ABHD6,ABO,ADAM10,ADAMTS9,ALDH6A1,ALLC,ANGPT2,ATRX,C4A/C4B,CALCR,CALCRL,CES2,CHN2,CPE,CPNE3,CXCL12,CXCR4,CYP4F2,CYP4F3,DPT,EDIL3,EDNRA,EIF2S1,ELF1,ENOSF1,ENPEP,ENTPD1,FAM198B,FAM216A,FGL2,FHL1,FILIP1L,FLT1,GRB10,HNF1B,HNRNPL,IQGAP1,JAG1,KCNMA1,KIF13A,LEPR,LTBP1,MAGI1,MAP4K5,MAST4,MBNL1,MBNL2,MCAM,MECOM,MIA2,MLXIPL,MUC5AC,NCOA2,NEFH,NFASC,NR1D2,OVGP1,PCM1,PDE4DIP,PGGT1B,PRKACB,PROX1,PTGER2,RAPGEF3,RASAL2,RIOK3,SEMA4G,SEMA6A,SENP7,SLC13A2,SLC22A18,SLC26A4,SLC38A2,SLC39A4,SLCO2A1,SPTLC3,SRPX2,SSBP2,STAG2,SULT1C2,SYT1,TCF7L2,TES,TFRC,TG,THBS1,THSD7A,TM4SF1,TNC,TPCN1,TSPAN5,TUBAL3,UBE3B,USH1C,UTRN,VDR,VLDLR,VPS13D,WNT5A,ZFR,ZFX,ZFY,ZNF277,ZNF480,ZNF711                                                                                                                                  | 106 |



Table G: Gene Functions Data Shown in Figure 6

|                                                                                            |                                       |            |  |        |                                                                                                                                                                                                                                                                                                                                                                                                                                                                                                                                                                                                                                                                                      |     |
|--------------------------------------------------------------------------------------------|---------------------------------------|------------|--|--------|--------------------------------------------------------------------------------------------------------------------------------------------------------------------------------------------------------------------------------------------------------------------------------------------------------------------------------------------------------------------------------------------------------------------------------------------------------------------------------------------------------------------------------------------------------------------------------------------------------------------------------------------------------------------------------------|-----|
| Cancer,Organismal Injury and Abnormalities                                                 | abdominal adenocarcinoma              | 0.0000057  |  |        | ABCC9,ABHD6,ABO,ADAM10,ADAMTS9,ALDH6A1,ALLC,ANGPT2,ATRX,C4A/C4B,CALCR,CALCRL,CE S2,CHN2,CPE,CPNE3,CXCL12,CXCR4,CYP4F2,CYP4F3,DPT,EDIL3,EDNRA,EIF2S1,ELF1,ENOSF1,EN PEP,ENTPD1,FAM198B,FAM216A,FGL2,FHL1,FILIP1L,FLT1,GRB10,HNF1B,HNRNPL,IQGAP1,JAG1,KC NMA1,KIF13A,LEPR,LTBP1,MAGI1,MAP4K5,MAST4,MBNL1,MBNL2,MCAM,MECOM,MIA2,MLXIPL,MUC 5AC,NCOA2,NEFH,NFASC,NR1D2,OVGP1,PCM1,PDE4DIP,PGGT1B,PRKACB,PROX1,PTGER2,RAPG EF3,RASAL2,RIOK3,SEMA4G,SEMA6A,SENP7,SLC13A2,SLC22A18,SLC26A4,SLC38A2,SLC39A4,SPT LC3,SRPX2,SSBP2,STAG2,SULT1C2,SYT1,TCF7L2,TES,TFRC,TG,THBS1,THSD7A,TM4SF1,TNC,TPC N1,TSPAN5,TUBAL3,UBE3B,USH1C,UTRN,VDR,VLDLR,VPS13D,WNT5A,ZFR,ZFX,ZFY,ZNF277,ZNF48 0,ZNF711 | 105 |
| Cancer,Organismal Injury and Abnormalities                                                 | tumorigene sis of carcinoma           | 0.00000592 |  | -0.447 | ABCC9,ABHD6,ADAM10,ADAMTS9,ALDH6A1,ALLC,ANGPT2,ATRX,C4A/C4B,CALCR,CALCRL,CEACA M1,CES2,CHN2,CPE,CPNE3,CXCL12,CYP4F2,CYP4F3,DLK1,EDIL3,EIF2S1,ELF1,ENPEP,FAM198B,FA M216A,FERMT1,FHL1,FILIP1L,FLT1,GPX2,GRB10,HNF1B,HNRNPL,IQGAP1,JAG1,KCNMA1,KIF13A,LE PR,LTBP1,MAGI1,MAP4K5,MAST4,MBNL1,MBNL2,MCAM,MECOM,MIA2,MLXIPL,MUC5AC,NCOA2,NEF H,NFASC,NR1D2,OVGP1,PCM1,PDE4DIP,PGGT1B,PROX1,PTGER2,RAPGEF3,RASAL2,RIOK3,SEMA4 G,SEMA6A,SENP7,SLC13A2,SLC22A18,SLC26A4,SLC38A2,SLC39A4,SPTLC3,SRPX2,SSBP2,STAG2, SULT1C2,SYT1,TCF7L2,TES,TFRC,TG,THBS1,THSD7A,TM4SF1,TNC,TPCN1,TSPAN5,TUBAL3,UBE3B ,USH1C,UTRN,VDR,VLDLR,VPS13D,WNT5A,ZFR,ZFX,ZFY,ZNF277,ZNF480,ZNF711                       | 101 |
| Cardiovascular System Development and Function,Organismal Development,Tissue Morphology    | morphology of cardiovascu lar tissue  | 0.00000614 |  |        | CLIC4,CXCR4,FLT1,SMAD5,STK4,TGFB2,THBS1                                                                                                                                                                                                                                                                                                                                                                                                                                                                                                                                                                                                                                              | 7   |
| Cancer,Organismal Injury and Abnormalities                                                 | tumorigene sis of benign tumor        | 0.0000062  |  |        | ANGPT2,ATRX,C4A/C4B,CES2,DPT,ENPEP,FLT1,ID4,LEPR,MCAM,MECOM,PTGER2,S100A4,SLC39A 4,SSBP2,STAG2,TAF13,TG,THBS1,VDR                                                                                                                                                                                                                                                                                                                                                                                                                                                                                                                                                                    | 20  |
| Cancer,Organismal Injury and Abnormalities,Reproductive System Disease                     | adenocarci noma in endometri um       | 0.00000696 |  |        | ABCC9,ABHD6,ANGPT2,ATRX,CES2,CHN2,CPNE3,CXCL12,CYP4F2,CYP4F3,EIF2S1,ELF1,FAM198B, FILIP1L,GRB10,HNRNPL,IQGAP1,JAG1,KCNMA1,KIF13A,MAP4K5,MAST4,MBNL1,MECOM,MUC5AC,N EFH,PDE4DIP,PROX1,RASAL2,RIOK3,SENP7,SLC13A2,SRPX2,STAG2,TES,TG,THBS1,TNC,TPCN1,U BE3B,USH1C,UTRN,VDR,VLDLR,ZFR,ZFX,ZNF277,ZNF480                                                                                                                                                                                                                                                                                                                                                                                 | 48  |
| Cancer,Neurological Disease,Organismal Injury and Abnormalities                            | central nervous system cancer         | 0.00000698 |  |        | ANGPT2,ATRX,DPT,FLT1,KCNMA1,LHPP,MAP4K5,MECOM,NANOG,RSPH14,S100A4,STAG2,TAF13,T CF7L2,TGFB2,THBS1,TNC,USH1C,ZFX                                                                                                                                                                                                                                                                                                                                                                                                                                                                                                                                                                      | 19  |
| Cell Death and Survival,Organismal Injury and Abnormalities                                | necrosis of epithelial tissue         | 0.0000071  |  | -0.394 | ANGPT2,ATRX,CALCR,CEACAM1,CLIC4,CXCL12,CXCR4,EDIL3,EMP1,FGL2,FLT1,MCAM,MECOM,NC O A2,SEMA6A,STK4,TFRC,THBS1,TMX1                                                                                                                                                                                                                                                                                                                                                                                                                                                                                                                                                                     | 19  |
| Cancer,Gastrointestinal Disease,Organismal Injury and Abnormalities                        | upper gastrointest inal tract tumor   | 0.00000737 |  |        | ABCC9,ADAM10,ADAMTS9,ANGPT2,CES2,CPE,CXCL12,CXCR4,CYP4F2,DPT,EDIL3,ENOSF1,ENPEP, FGL2,FILIP1L,FLT1,HNRNPL,JAG1,KCNMA1,LEPR,MAST4,MBNL2,ME2,MECOM,MUC5AC,NCOA2,NEF H,NFASC,OVGP1,PDE4DIP,PRKACB,PROX1,RASAL2,SEMA4G,SLC13A2,SLC22A1,SPTLC3,SSBP2,T ES,TG,THBS1,THSD7A,TLK1,TM4SF1,TNC,TPCN1,UBE3B,UTRN,VLDLR,WNT5A,ZFR,ZNF480                                                                                                                                                                                                                                                                                                                                                         | 52  |
| Cancer,Organismal Injury and Abnormalities,Reproductive System Disease                     | female genital tract serous carcinoma | 0.00000772 |  |        | ATRX,C4A/C4B,CXCL12,DPT,EDNRA,ENPEP,ENTPD1,FGL2,FILIP1L,KCNMA1,MCAM,MECOM,PTGER 2,SLC39A4,STAG2                                                                                                                                                                                                                                                                                                                                                                                                                                                                                                                                                                                      | 15  |
| Cancer,Gastrointestinal Disease,Hepatic System Disease,Organismal Injury and Abnormalities | hepatocellul ar carcinoma             | 0.00000862 |  |        | BAG2,CEACAM1,CES2,CREB1,CXCL12,DPT,FERMT1,FLT1,GPX2,IQGAP1,JAG1,LYVE1,NUPR1,PAMR 1,PROX1,PROZ,RASAL2,S100A4,SLC26A4,TCF7L2,TG,VDR                                                                                                                                                                                                                                                                                                                                                                                                                                                                                                                                                    | 22  |

Table G: Gene Functions Data Shown in Figure 6

|                                                                                                                    |                                       |            |  |        |                                                                                                                                                                                                                                                                                                                                                                                                                                                                                                                                                                                                                                                                                                                                                 |     |
|--------------------------------------------------------------------------------------------------------------------|---------------------------------------|------------|--|--------|-------------------------------------------------------------------------------------------------------------------------------------------------------------------------------------------------------------------------------------------------------------------------------------------------------------------------------------------------------------------------------------------------------------------------------------------------------------------------------------------------------------------------------------------------------------------------------------------------------------------------------------------------------------------------------------------------------------------------------------------------|-----|
| Cancer,Gastrointestinal Disease,Organismal Injury and Abnormalities                                                | gastrointestinal neoplasia            | 0.00000869 |  | 0.374  | ABCC9,ADAM10,ADAMTS9,ALDH6A1,ALLC,ANGPT2,ATRX,CALCR,CALCRL,CALU,CDC40,CEACAM1,CES2,CPE,CREB1,CXCL12,CXCR4,CYP4F2,DLK1,DNAJB4,DPT,EDIL3,EFS,ELF1,EMP1,ENOSF1,ENPEP,FAM198B,FAM216A,FERMT1,FGL2,FHL1,FHL5,FILIP1L,FLT1,GGH,GPX2,GRB10,HNRNPL,IQGAP1,ITGB1BP1,JAG1,KCNMA1,KIF13A,LEPR,LHPP,LTBP1,MAGI1,MAP4K5,MAST4,MBNL1,MBNL2,MCAM,ME2,MECOM,MIA2,MLXIPL,MUC5AC,NCOA2,NEFH,NFASC,NR1D2,OVGP1,PAMR1,PCM1,PDCD4,PDE4DIP,PGGT1B,PLCL2,PRKACB,PROX1,RAPGEF3,RASAL2,RIOK3,S100A4,SEMA4G,SEMA6A,SENP7,SLC13A2,SLC26A4,SLC38A2,SLC39A4,SLCO2A1,SPAG5,SPTLC3,SRPX2,SSBP2,STAG2,STK4,SULT1C2,SYT1,TAF13,TCF7L2,TES,TFRC,TG,TGFB2,THBS1,THSD7A,TLK1,TM4SF1,TMX1,TNC,TPCN1,TSPAN5,TUBAL3,UBE3B,UTRN,VDR,VLDLR,VPS13D,WNT5A,ZFR,ZFX,ZFY,ZNF277,ZNF480,ZNF711 | 118 |
| Cancer,Cellular Development,Cellular Growth and Proliferation,Organismal Injury and Abnormalities,Tumor Morphology | proliferation of cancer cells         | 0.00000876 |  | -0.616 | ADAM10,CEACAM1,CXCL12,CXCR4,DLK1,FHL1,JAG1,MCAM,PROX1,TCF7L2,TGFB2,THBS1,VDR,WNT5A                                                                                                                                                                                                                                                                                                                                                                                                                                                                                                                                                                                                                                                              | 14  |
| Cancer,Organismal Injury and Abnormalities                                                                         | head and neck carcinoma               | 0.00000926 |  |        | ABCC9,ABO,ADAM10,ALLC,AMY1C (includes others),ANGPT2,ATRX,CALCR,CES2,CREB1,CXCL12,CXCR4,DPT,EDIL3,ENPEP,FAM198B,FHL5,FLT1,MAGI1,MECOM,MIA2,MUC5AC,NEFH,NR1D2,OVGP1,PCM1,PDE4DIP,PRKACB,PROX1,S100A4,SEMA6A,STAG2,TG,THBS1,THSD7A,TLK1,TM4SF1,TNC,WNT5A                                                                                                                                                                                                                                                                                                                                                                                                                                                                                          | 39  |
| Cancer,Endocrine System Disorders,Organismal Injury and Abnormalities                                              | endocrine gland tumor                 | 0.00000974 |  |        | ABCC9,ADAM10,AMY1C (includes others),ANGPT2,ATRX,CES2,CREB1,CXCR4,CYP4F2,FERMT1,FLT1,ID4,ITGB1BP1,KCNMA1,MIA2,NEFH,PCM1,PDCD6,PDE4DIP,RASAL2,TAF13,TG,THBS1,UTRN,VDR,WNT5A,ZFR,ZNF277                                                                                                                                                                                                                                                                                                                                                                                                                                                                                                                                                           | 28  |
| Cancer,Organismal Injury and Abnormalities                                                                         | head and neck adenocarcinoma          | 0.00000979 |  |        | ANGPT2,FLT1,PRKACB,TG,THBS1,TLK1,TNC                                                                                                                                                                                                                                                                                                                                                                                                                                                                                                                                                                                                                                                                                                            | 7   |
| Nervous System Development and Function                                                                            | development of central nervous system | 0.0000103  |  | 0.113  | ADAM10,ATRX,CREB1,CXCL12,CXCR4,HNF1B,ID4,MECOM,NEFH,PROX1,RAPGEF3,S100A4,SMAD5,STK4,TCF7L2,TG,THBS1,TNC,VLDLR,WNT5A                                                                                                                                                                                                                                                                                                                                                                                                                                                                                                                                                                                                                             | 20  |
| Cell Death and Survival                                                                                            | necrosis                              | 0.0000103  |  | -0.408 | ABCC9,ADAM10,ANGPT2,ATRX,CALCR,CALCRL,CEACAM1,CLIC4,CREB1,CXCL12,CXCR4,DLK1,EDIL3,EDNRA,EIF2S1,ELF1,EMP1,ENTPD1,FGL2,FLT1,GPX2,GRB10,HNF1B,JAG1,KCNMA1,LEPR,LTBP1,MAGI1,MCAM,MECOM,NANOG,NCOA2,NEFH,NUPR1,PDCD4,PTGER2,RAPGEF3,RETREG1,S100A4,SEMA6A,SPAG5,STK4,TANK,TCF7L2,TFRC,TGFB2,THBS1,TMX1,TNC,VDR,WNT5A                                                                                                                                                                                                                                                                                                                                                                                                                                 | 51  |
| Organ Morphology,Reproductive System Development and Function,Tissue Morphology                                    | quantity of germ cells                | 0.0000114  |  | -1.783 | CXCL12,CXCR4,ENTPD1,FHL5,SMAD5,TGFB2,VDR,WNT5A,ZFX                                                                                                                                                                                                                                                                                                                                                                                                                                                                                                                                                                                                                                                                                              | 9   |
| Molecular Transport,Nucleic Acid Metabolism,Small Molecule Biochemistry                                            | quantity of cyclic nucleotides        | 0.0000114  |  | 0.419  | CALCRL,CXCL12,CXCR4,CYP4F2,ENTPD1,HNF1B,LEPR,PTGER2,THBS1,WNT5A                                                                                                                                                                                                                                                                                                                                                                                                                                                                                                                                                                                                                                                                                 | 10  |
| Cancer,Gastrointestinal Disease,Organismal Injury and Abnormalities                                                | upper gastrointestinal tract cancer   | 0.0000123  |  |        | ABCC9,ADAM10,ADAMTS9,ANGPT2,CES2,CPE,CXCL12,CXCR4,CYP4F2,DPT,EDIL3,ENPEP,FILIP1L,FLT1,HNRNPL,KCNMA1,MAST4,MBNL2,MUC5AC,NCOA2,NEFH,NFASC,OVGP1,PDE4DIP,PRKACB,SEMA4G,SLC13A2,SPTLC3,SSBP2,TG,THBS1,THSD7A,TLK1,TM4SF1,TNC,TPCN1,UBE3B,UTRN,VLDLR,WNT5A,ZFR,ZNF480                                                                                                                                                                                                                                                                                                                                                                                                                                                                                | 42  |
| Cardiovascular System Development and Function,Tissue Morphology                                                   | permeability of vascular system       | 0.0000124  |  | -0.58  | ADAM10,ANGPT2,C4A/C4B,CREB1,CXCL12,FLT1,MCAM,RAPGEF3,THBS1                                                                                                                                                                                                                                                                                                                                                                                                                                                                                                                                                                                                                                                                                      | 9   |
| Cellular Movement,Reproductive System Development and Function                                                     | migration of primordial germ cells    | 0.0000126  |  |        | CXCL12,CXCR4,WNT5A                                                                                                                                                                                                                                                                                                                                                                                                                                                                                                                                                                                                                                                                                                                              | 3   |

Table G: Gene Functions Data Shown in Figure 6

|                                                                                                                      |                                      |           |        |  |                                                                                                                                                                                                                                                                                                                                                                                          |    |
|----------------------------------------------------------------------------------------------------------------------|--------------------------------------|-----------|--------|--|------------------------------------------------------------------------------------------------------------------------------------------------------------------------------------------------------------------------------------------------------------------------------------------------------------------------------------------------------------------------------------------|----|
| Cancer,Endocrine System Disorders,Organismal Injury and Abnormalities                                                | thyroid gland nonmedullary carcinoma | 0.0000129 |        |  | ANGPT2,CES2,CREB1,CXCR4,FLT1,PCM1,TG,THBS1,WNT5A                                                                                                                                                                                                                                                                                                                                         | 9  |
| Cancer,Organismal Injury and Abnormalities,Reproductive System Disease                                               | tumorigenesis of genital tumor       | 0.000013  |        |  | ABCC9,ABHD6,ANGPT2,ATRX,C4A/C4B,CES2,CHN2,CPE,CPNE3,CXCL12,CYP4F2,CYP4F3,EIF2S1,ELF1,ENPEP,FAM198B,FILIP1L,FLT1,GRB10,HNRNPL,IQGAP1,JAG1,KCNMA1,KIF13A,MAP4K5,MAST4,MBNL1,MCAM,MECOM,MUC5AC,NEFH,PDE4DIP,PROX1,PTGER2,RASAL2,RIOK3,SENP7,SLC13A2,SLC22A18,SLC39A4,SRPX2,STAG2,TES,TG,THBS1,TM4SF1,TNC,TPCN1,TUBAL3,UBE3B,USH1C,UTRN,VDR,VLDLR,ZFR,ZFX,ZNF277,ZNF480                      | 58 |
| Cancer,Organismal Injury and Abnormalities,Reproductive System Disease                                               | uterine carcinoma                    | 0.0000131 |        |  | ABCC9,ABHD6,ANGPT2,ATRX,CES2,CHN2,CPNE3,CXCL12,CYP4F2,CYP4F3,EIF2S1,ELF1,FAM198B,FILIP1L,GRB10,HNRNPL,IQGAP1,JAG1,KCNMA1,KIF13A,MAP4K5,MAST4,MBNL1,MECOM,MUC5AC,NEFH,PDE4DIP,PROX1,RASAL2,RIOK3,SENP7,SLC13A2,SLCO2A1,SRPX2,STAG2,TES,TG,THBS1,TNC,TPCN1,UBE3B,USH1C,UTRN,VDR,VLDLR,WNT5A,ZFR,ZFX,ZNF277,ZNF480                                                                          | 50 |
| Cancer,Organismal Injury and Abnormalities                                                                           | cancer of cells                      | 0.0000132 | -1.912 |  | ABCC9,ABO,ADAM10,ADAMTS9,ALLC,ANGPT2,ATRX,CALCR,CES2,CHN2,CREB1,CXCL12,CXCR4,CYP4F3,DPT,EDIL3,ENOSF1,ENPEP,FAM198B,FERMT1,FGL2,FHL5,FILIP1L,GPX2,GRB10,JAG1,KCNMA1,LEPR,MAGI1,MAST4,MBNL1,MBNL2,MCAM,ME2,MECOM,MIA2,MUC5AC,NEFH,NR1D2,OVGP1,PCM1,PDCD4,PDE4DIP,PROX1,PTGER2,RASAL2,RETREG1,S100A4,SEMA4G,SEMA6A,SLCO2A1,SSBP2,STAG2,TCF7L2,TG,THBS1,THSD7A,TM4SF1,TNC,USH1C,WNT5A,ZNF711 | 62 |
| Cardiovascular Disease,Cardiovascular System Development and Function,Organismal Injury and Abnormalities            | abnormal morphology of vasculature   | 0.0000135 |        |  | CALCRL,CLIC4,CREB1,CXCL12,CXCR4,DLK1,EDNRA,FLT1,LTBP1,SMAD5,STK4,TGFB2,THBS1                                                                                                                                                                                                                                                                                                             | 13 |
| Post-Translational Modification                                                                                      | phosphorylation of protein           | 0.0000138 | -1.579 |  | ADAM10,CREB1,CXCR4,EDIL3,EDNRA,EIF2S1,ELF1,FLT1,GRB10,IQGAP1,MAP4K5,PRKACB,RAPGEF3,SMAD5,SRPX2,STK4,TGFB2,THBS1,TLK1,WNT5A                                                                                                                                                                                                                                                               | 20 |
| Cancer,Organismal Injury and Abnormalities,Reproductive System Disease                                               | uterine endometrioid carcinoma       | 0.000014  |        |  | ABCC9,ABHD6,ANGPT2,ATRX,CHN2,CPNE3,CXCL12,CYP4F2,CYP4F3,EIF2S1,ELF1,FAM198B,FILIP1L,GRB10,HNRNPL,IQGAP1,JAG1,KCNMA1,KIF13A,MAP4K5,MAST4,MBNL1,MECOM,MUC5AC,NEFH,PDE4DIP,PROX1,RASAL2,RIOK3,SENP7,SLC13A2,SRPX2,STAG2,TES,TG,THBS1,TNC,TPCN1,UBE3B,USH1C,UTRN,VDR,VLDLR,ZFR,ZFX,ZNF277,ZNF480                                                                                             | 47 |
| Connective Tissue Disorders,Inflammatory Disease,Organismal Injury and Abnormalities,Skeletal and Muscular Disorders | Rheumatic Disease                    | 0.0000143 | -0.627 |  | ADAM10,ADAMTS9,C4A/C4B,CALCRL,CEACAM1,CPE,CREB1,CXCL12,CXCR4,CYP4F3,EDNRA,FGL2,FLT1,GRB10,JAG1,LEPR,MAGI1,MUC5AC,NCOA2,PCM1,PTGER2,TAF13,TCF7L2,TFRC,TGFB2,THBS1,TNC,VDR,WNT5A                                                                                                                                                                                                           | 29 |
| Inflammatory Disease                                                                                                 | chronic inflammatory disorder        | 0.0000144 |        |  | ADAM10,C4A/C4B,CALCRL,CXCL12,CXCR4,CYP4F3,ENTPD1,FERMT1,FGL2,FLT1,GRB10,HSF2,LEPR,MAGI1,MCAM,MMSO1,NCOA2,PCM1,PTGER2,S100A4,TAF13,TCF7L2,TFRC,TGFB2,THBS1,TNC,VDR,WNT5A                                                                                                                                                                                                                  | 28 |
| Cancer,Endocrine System Disorders,Organismal Injury and Abnormalities                                                | differentiated thyroid cancer        | 0.0000146 |        |  | ANGPT2,CES2,CREB1,CXCR4,FLT1,PCM1,TG,THBS1,WNT5A                                                                                                                                                                                                                                                                                                                                         | 9  |
| Molecular Transport                                                                                                  | transport of molecule                | 0.0000148 | 0.627  |  | ABCC9,ANGPT2,CALCR,CALCRL,CLIC4,CPE,CPNE3,CREB1,CXCL12,EDNRA,ENTPD1,FHL1,GRB10,IQGAP1,ITGB1BP1,KCNMA1,KIF13A,PDCD6,RAPGEF3,SLC13A2,SLC22A18,SLC26A4,SLC38A2,SLC38A3,SLC39A4,SLCO2A1,SYT1,TFRC,TG,TGFB2,THBS1,TLK1,VDR,VLDLR,WNT5A                                                                                                                                                        | 35 |
| Cancer,Neurological Disease,Organismal Injury and Abnormalities                                                      | glioma                               | 0.0000152 | -1     |  | ALLC,ANGPT2,ATRX,CXCL12,CXCR4,DLK1,FLT1,JAG1,KCNMA1,LHPP,MECOM,MUC5AC,NEFH,PDE4DIP,S100A4,SMAD5,SPTLC3,STAG2,SULT1C2,TAF13,TCF7L2,TGFB2,TNC,USH1C,WNT5A,ZNF480                                                                                                                                                                                                                           | 26 |

Table G: Gene Functions Data Shown in Figure 6

|                                                                                       |                                           |           |        |                                                                                                                                                                                                                                                                                                                                                                                                                                                         |    |
|---------------------------------------------------------------------------------------|-------------------------------------------|-----------|--------|---------------------------------------------------------------------------------------------------------------------------------------------------------------------------------------------------------------------------------------------------------------------------------------------------------------------------------------------------------------------------------------------------------------------------------------------------------|----|
| Cardiovascular System Development and Function,Cell-To-Cell Signaling and Interaction | adhesion of vascular endothelial cells    | 0.000016  | -0.3   | ADAM10,ANGPT2,CXCL12,CXCR4,FLT1,MCAM,THBS1                                                                                                                                                                                                                                                                                                                                                                                                              | 7  |
| Cardiovascular System Development and Function,Cellular Movement                      | migration of endothelial cells            | 0.000016  | -1.634 | ADAM10,ANGPT2,CXCL12,EDIL3,FLT1,ITGB1BP1,MCAM,PDCD6,PROX1,TG,TGFB2,THBS1,WNT5A                                                                                                                                                                                                                                                                                                                                                                          | 13 |
| Cancer,Organismal Injury and Abnormalities                                            | benign connective or soft tissue neoplasm | 0.0000163 |        | ANGPT2,CALCRL,DPT,FLT1,IQGAP1,LTBP1,PTGER2,RAB23,RAPGEF3,SMAD5,TAF13,TNC,UTRN,VD R                                                                                                                                                                                                                                                                                                                                                                      | 14 |
| Cancer,Neurological Disease,Organismal Injury and Abnormalities                       | astrocytoma                               | 0.0000163 |        | ALLC,ANGPT2,ATRX,CXCL12,CXCR4,FLT1,JAG1,KCNMA1,LHPP,MECOM,MUC5AC,NEFH,PDE4DIP,S100A4,SMAD5,SPTLC3,STAG2,SULT1C2,TAF13,TCF7L2,TGFB2,TNC,USH1C,ZNF480                                                                                                                                                                                                                                                                                                     | 24 |
| Cancer,Organismal Injury and Abnormalities,Reproductive System Disease                | metastasis of mammary tumor               | 0.0000183 | -1.172 | CXCR4,FLT1,PTGER2,S100A4,TM4SF1,WNT5A                                                                                                                                                                                                                                                                                                                                                                                                                   | 6  |
| Cancer,Gastrointestinal Disease,Organismal Injury and Abnormalities                   | colon tumor                               | 0.0000184 |        | ADAM10,ADAMTS9,ALDH6A1,ALLC,ANGPT2,ATRX,CALCR,CEACAM1,CES2,CYP4F2,EDIL3,ELF1,ENP EP,FAM216A,FERMT1,FHL1,FLT1,GGH,GPX2,HNRNPL,JAG1,KCNMA1,KIF13A,LEPR,LTBP1,MAGI1,MAP4K5,MAST4,MBNL1,MCAM,MECOM,MIA2,MLXIPL,MUC5AC,NCOA2,NEFH,NFASC,NR1D2,OVGP1,PCM1,PDCD4,PDE4DIP,PGGT1B,RAPGEF3,RASAL2,RIOK3,SEMA4G,SEMA6A,SENP7,SLC13A2,SLC38A2,SLC39A4,SSBP2,SULT1C2,SYT1,TCF7L2,TES,TFRC,TG,THBS1,THSD7A,TNC,TUBAL3,UTRN,VDR,VPS13D,WNT5A,ZFR,ZFX,ZFY,ZNF480,ZNF711 | 72 |
| Cancer,Organismal Injury and Abnormalities,Reproductive System Disease                | endometrioid endometrial adenocarcinoma   | 0.0000195 |        | ABCC9,ABHD6,ANGPT2,CHN2,CPNE3,CXCL12,CYP4F2,CYP4F3,EIF2S1,ELF1,FAM198B,FILIP1L,GRB10,HNRNPL,IQGAP1,JAG1,KCNMA1,KIF13A,MAP4K5,MAST4,MBNL1,MECOM,MUC5AC,NEFH,PDE4DIP,PROX1,RASAL2,RIOK3,SENP7,SLC13A2,SRPX2,STAG2,TES,TG,THBS1,TNC,TPCN1,UBE3B,USH1C,UTRN,VDR,VLDLR,ZFR,ZFX,ZNF277,ZNF480                                                                                                                                                                 | 46 |
| Cardiovascular System Development and Function,Organismal Development                 | patterning of blood vessel                | 0.0000197 |        | CXCL12,CXCR4,EDNRA,FLT1,STK4                                                                                                                                                                                                                                                                                                                                                                                                                            | 5  |
| Cardiovascular System Development and Function                                        | morphology of vessel component            | 0.0000198 |        | ANGPT2,CALCRL,CXCL12,CXCR4,LTBP1,TGFB2                                                                                                                                                                                                                                                                                                                                                                                                                  | 6  |
| Cancer,Organismal Injury and Abnormalities,Respiratory Disease                        | lung tumor                                | 0.0000199 | 1.061  | ATRX,CEACAM1,CES2,CHN2,CXCR4,DLK1,DNAJB4,DPT,EIF2S1,FERMT1,FHL1,FLT1,GRB10,KCNMA1,LEPR,LTBP1,MAGI1,MAP4K5,MAST4,MECOM,NCOA2,NUPR1,PDCD4,PDCD6,PGGT1B,S100A4,SLC22A18,SSBP2,STAG2,TG,THBS1,THSD7A,TNC,UTRN,WNT5A                                                                                                                                                                                                                                         | 35 |
| Cellular Movement                                                                     | homing of stem cells                      | 0.00002   |        | CXCL12,CXCR4,S100A4                                                                                                                                                                                                                                                                                                                                                                                                                                     | 3  |
| Organismal Functions                                                                  | energy expenditure                        | 0.0000215 | -0.128 | CEACAM1,CPE,CREB1,LEPR,PLCL2,RAPGEF3,TG,VDR                                                                                                                                                                                                                                                                                                                                                                                                             | 8  |
| Cellular Movement                                                                     | cell movement of melanoma cell lines      | 0.0000215 | -1.979 | CXCL12,CXCR4,MCAM,RAPGEF3,TGFB2,THBS1,TNC,WNT5A                                                                                                                                                                                                                                                                                                                                                                                                         | 8  |
| Cell Death and Survival                                                               | cell viability                            | 0.0000226 | -1.144 | ANGPT2,ATRX,CALCR,CDC40,CEACAM1,CREB1,CXCL12,CXCR4,DLK1,ELF1,FLT1,HNF1B,HSF2,ID4,IQGAP1,ITGB1BP1,JAG1,LEPR,MCAM,MECOM,NEFH,NUPR1,PDCD4,PRKACB,S100A4,SEMA6A,TANK,TGFB2,THBS1,VDR,WNT5A                                                                                                                                                                                                                                                                  | 31 |

Table G: Gene Functions Data Shown in Figure 6

|                                                                                                                                                                           |                                           |           |  |        |                                                                                                                                                                                                                                                                                                                                                                                                                                                   |    |
|---------------------------------------------------------------------------------------------------------------------------------------------------------------------------|-------------------------------------------|-----------|--|--------|---------------------------------------------------------------------------------------------------------------------------------------------------------------------------------------------------------------------------------------------------------------------------------------------------------------------------------------------------------------------------------------------------------------------------------------------------|----|
| Embryonic Development,Hematological System Development and Function,Lymphoid Tissue Structure and Development,Organ Development,Organismal Development,Tissue Development | formation of lymphoid tissue              | 0.0000229 |  | -1.798 | ADAM10,ANGPT2,C4A/C4B,CALCRL,CREB1,CXCL12,CXCR4,EDNRA,FLT1,GABPA,LYVE1,PROX1,STK4                                                                                                                                                                                                                                                                                                                                                                 | 13 |
| Nervous System Development and Function,Neurological Disease                                                                                                              | abnormal morphology of nervous system     | 0.0000235 |  |        | CREB1,CXCL12,CXCR4,EDNRA,ENTPD1,JAG1,MBNL1,MBNL2,MECOM,NEFH,NFASC,PRKACB,RETR EG1,SLC26A4,SMAD5,TCF7L2,TGFB2,USH1C,UTRN,VLDLR,WNT5A                                                                                                                                                                                                                                                                                                               | 21 |
| Cancer,Cardiovascular Disease,Organismal Injury and Abnormalities                                                                                                         | hemangioma                                | 0.0000235 |  |        | ANGPT2,CEACAM1,CXCL12,EDNRA,FLT1,JAG1,S100A4,THBS1                                                                                                                                                                                                                                                                                                                                                                                                | 8  |
| Cancer,Endocrine System Disorders,Organismal Injury and Abnormalities                                                                                                     | malignant neoplasm of endocrine gland     | 0.0000235 |  |        | AMY1C (includes others),ANGPT2,CES2,CREB1,CXCR4,FLT1,KCNMA1,MIA2,NEFH,PCM1,PDCD6,PDE4DIP,TAF13,TG,THBS1,UTRN,WNT5A                                                                                                                                                                                                                                                                                                                                | 17 |
| Cancer,Endocrine System Disorders,Organismal Injury and Abnormalities                                                                                                     | thyroid carcinoma                         | 0.0000239 |  |        | AMY1C (includes others),ANGPT2,CES2,CREB1,CXCR4,FLT1,MIA2,NEFH,PCM1,PDE4DIP,TG,THBS1,WNT5A                                                                                                                                                                                                                                                                                                                                                        | 13 |
| Cancer,Organismal Injury and Abnormalities,Reproductive System Disease,Skeletal and Muscular Disorders                                                                    | uterine leiomyoma                         | 0.0000241 |  |        | CALCRL,DPT,IQGAP1,LTBP1,RAB23,RAPGEF3,SMAD5,TAF13,TNC,UTRN,VDR                                                                                                                                                                                                                                                                                                                                                                                    | 11 |
| Cellular Movement,Skeletal and Muscular System Development and Function                                                                                                   | migration of vascular smooth muscle cells | 0.0000251 |  | -1.14  | ANGPT2,CALCRL,CLIC4,FHL1,FLT1,S100A4,THBS1                                                                                                                                                                                                                                                                                                                                                                                                        | 7  |
| Cellular Movement                                                                                                                                                         | invasion of cells                         | 0.0000253 |  | -1.083 | ADAM10,ANGPT2,CEACAM1,CXCL12,CXCR4,DNAJB4,FLT1,ID4,IQGAP1,KCNMA1,MAGI1,MCAM,NANOG,NCOA2,PDCD4,PROX1,PTGER2,S100A4,SMAD5,TGFB2,THBS1,TNC,VDR,WNT5A                                                                                                                                                                                                                                                                                                 | 24 |
| Cancer,Gastrointestinal Disease,Hepatic System Disease,Organismal Injury and Abnormalities                                                                                | hepatobiliary system cancer               | 0.0000254 |  | 0.64   | ABCC9,ADAM10,ANGPT2,ATRX,BAG2,CALCRL,CDC40,CEACAM1,CES2,CHN2,CPNE3,CREB1,CXCL12,CXCR4,DPT,EDIL3,EDNRA,EFS,ENTPD1,FERMT1,FHL1,FLT1,GPX2,GRB10,ID4,IQGAP1,JAG1,KCNMA1,LEPR,LYVE1,MAP4K5,MAST4,MDFIC,ME2,MECOM,MIA2,MLXIPL,MUC5AC,NCOA2,NUPR1,OVGP1,PAMR1,PDE4DIP,PLCL2,PROX1,PROZ,RAB23,RAPGEF3,RASAL2,RIOK3,S100A4,SEMA6A,SLC26A4,SLC38A2,SLC39A4,SRPX2,STAG2,TCF7L2,TG,TGFB2,THBS1,TLK1,TM4SF1,TPCN1,UBE3B,USH1C,UTRN,VDR,VLDLR,VPS13D,ZFR,ZNF277 | 72 |
| Connective Tissue Disorders,Organismal Injury and Abnormalities,Skeletal and Muscular Disorders                                                                           | non-traumatic arthropathy                 | 0.0000268 |  |        | ADAM10,ADAMTS9,C4A/C4B,CALCRL,CXCL12,CXCR4,CYP4F3,FGL2,FLT1,GRB10,MAGI1,MUC5AC,NCOA2,PCM1,PTGER2,TAF13,TCF7L2,TFRC,TGFB2,THBS1,TNC,VDR,WNT5A                                                                                                                                                                                                                                                                                                      | 23 |
| Reproductive System Development and Function                                                                                                                              | morphology of reproductive system         | 0.0000272 |  |        | ATRX,CALCRL,DLK1,FHL5,FLT1,GRB10,MECOM,MLXIPL,NCOA2,NUPR1,PTGER2,RAPGEF3,SMAD5,STK4,TGFB2,THBS1,VDR,VLDLR,WNT5A                                                                                                                                                                                                                                                                                                                                   | 19 |

Table G: Gene Functions Data Shown in Figure 6

|                                                                                                                                                                  |                                      |           |  |        |                                                                                                                                                                                                                                                                                                                                                                                                                                                                                                                                                                                                                                                                                                                    |     |
|------------------------------------------------------------------------------------------------------------------------------------------------------------------|--------------------------------------|-----------|--|--------|--------------------------------------------------------------------------------------------------------------------------------------------------------------------------------------------------------------------------------------------------------------------------------------------------------------------------------------------------------------------------------------------------------------------------------------------------------------------------------------------------------------------------------------------------------------------------------------------------------------------------------------------------------------------------------------------------------------------|-----|
| Cancer,Dermatological Diseases and Conditions,Organismal Injury and Abnormalities                                                                                | skin tumor                           | 0.0000277 |  | -0.277 | ABCC9,ABHD6,ABO,ADAM10,ADAMTS9,ALDH6A1,ALLC,ATRX,C4A/C4B,CALCR,CALCRL,CALU,CES2,CHN2,CLIC4,CPE,CPNE3,CXCL12,CYP4F2,CYP4F3,DLK1,EDIL3,EDNRA,EFS,ENPEP,ENTPD1,FAM198B,FAM216A,FERMT1,FGL2,FHL1,FHL5,FILIP1L,FLT1,GPX2,HNRNPL,HSF2,JAG1,KCNMA1,KIF13A,LEPR,LTBP1,MAGI1,MAP4K5,MAST4,MBNL1,MCAM,MECOM,MIA2,MLXIPL,MUC5AC,NCOA2,NEFH,NFASC,OVGP1,PAMR1,PDE4DIP,PLCL2,PRKACB,PROX1,PTGER2,RAPGEF3,RASAL2,RIOK3,S100A4,SEMA4G,SENP7,SLC13A2,SLC22A18,SLC39A4,SLCO2A1,SPAG5,SPTLC3,SULT1C2,SYT1,TCF7L2,TFRC,TG,THBS1,THSD7A,TM4SF1,TNC,TSPAN5,TUBAL3,USH1C,UTRN,VDR,VLDLR,VPS13D,WNT5A,ZFR,ZFX,ZNF711                                                                                                                      | 94  |
| Cell Signaling,Molecular Transport,Vitamin and Mineral Metabolism                                                                                                | quantity of Ca <sup>2+</sup>         | 0.0000285 |  | -0.985 | ANGPT2,CALCR,CXCL12,CXCR4,EDNRA,EIF2S1,ENTPD1,LTBP1,MCAM,PTGER2,RAPGEF3,S100A4,VDR,WNT5A                                                                                                                                                                                                                                                                                                                                                                                                                                                                                                                                                                                                                           | 14  |
| Cancer,Organismal Injury and Abnormalities,Respiratory Disease                                                                                                   | respiratory system tumor             | 0.0000287 |  | 1.061  | ABCC9,ATRX,CALCR,CEACAM1,CES2,CHN2,CXCR4,DLK1,DNAJB4,DPT,EDIL3,EIF2S1,FERMT1,FHL1,FHL5,FLT1,GRB10,KCNMA1,LEPR,LTBP1,MAGI1,MAP4K5,MAST4,MECOM,NCOA2,NUPR1,PCM1,PD CD4,PDCD6,PGGT1B,PROX1,S100A4,SLC22A18,SSBP2,STAG2,TG,THBS1,THSD7A,TNC,UTRN,WNT5A                                                                                                                                                                                                                                                                                                                                                                                                                                                                 | 41  |
| Cardiovascular System Development and Function,Tissue Morphology                                                                                                 | morphology of blood vessel           | 0.0000298 |  |        | ANGPT2,CALCRL,CXCL12,CXCR4,EDNRA,FLT1,ITGB1BP1,LTBP1,SMAD5,STK4,TGFB2,VDR                                                                                                                                                                                                                                                                                                                                                                                                                                                                                                                                                                                                                                          | 12  |
| Cell Morphology,Cellular Function and Maintenance                                                                                                                | permeability of cells                | 0.0000311 |  | -0.505 | ADAM10,ANGPT2,CREB1,CXCL12,ENTPD1,MCAM,RAPGEF3                                                                                                                                                                                                                                                                                                                                                                                                                                                                                                                                                                                                                                                                     | 7   |
| Cardiovascular Disease,Organismal Injury and Abnormalities                                                                                                       | abnormality of heart ventricle       | 0.0000314 |  |        | ABCC9,ANGPT2,CXCR4,EDNRA,FLT1,MBNL1,MBNL2,PDCD4,SLCO2A1,STK4,TGFB2,THBS1,VDR                                                                                                                                                                                                                                                                                                                                                                                                                                                                                                                                                                                                                                       | 13  |
| Cellular Movement                                                                                                                                                | cell movement of muscle cells        | 0.0000345 |  | -0.89  | ANGPT2,CALCRL,CLIC4,CREB1,FHL1,FLT1,ITGB1BP1,S100A4,THBS1                                                                                                                                                                                                                                                                                                                                                                                                                                                                                                                                                                                                                                                          | 9   |
| Connective Tissue Disorders,Immunological Disease,Inflammatory Disease,Inflammatory Response,Organismal Injury and Abnormalities,Skeletal and Muscular Disorders | rheumatoid arthritis                 | 0.0000349 |  |        | ADAM10,C4A/C4B,CALCRL,CXCL12,CXCR4,CYP4F3,FGL2,FLT1,GRB10,MAGI1,NCOA2,PCM1,PTGER2,TAF13,TCF7L2,TFRC,TGFB2,THBS1,TNC,VDR,WNT5A                                                                                                                                                                                                                                                                                                                                                                                                                                                                                                                                                                                      | 21  |
| Cancer,Gastrointestinal Disease,Organismal Injury and Abnormalities                                                                                              | gastrointestinal tract cancer        | 0.0000352 |  |        | ABCC9,ADAM10,ADAMTS9,ALDH6A1,ALLC,ANGPT2,ATRX,CALCR,CALCRL,CALU,CDC40,CEACAM1,CES2,CPE,CREB1,CXCL12,CXCR4,CYP4F2,DLK1,DNAJB4,DPT,EDIL3,EFS,ELF1,EMP1,ENOSF1,ENPEP,FAM198B,FAM216A,FERMT1,FHL1,FHL5,FILIP1L,FLT1,GGH,GPX2,GRB10,HNRNPL,IQGAP1,JAG1,KCNMA1,KIF13A,LEPR,LHPP,LTBP1,MAGI1,MAP4K5,MAST4,MBNL1,MBNL2,MCAM,MECOM,MIA2,MLXIPL,MUC5AC,NCOA2,NEFH,NFASC,NR1D2,OVGP1,PAMR1,PCM1,PDCD4,PDE4DIP,PGGT1B,PLCL2,PRKACB,PROX1,RAPGEF3,RASAL2,RIOK3,S100A4,SEMA4G,SEMA6A,SENP7,SLC13A2,SLC26A4,SLC38A2,SLC39A4,SLCO2A1,SPAG5,SPTLC3,SRPX2,SSBP2,STAG2,STK4,SULT1C2,SYT1,TAF13,TCF7L2,TFRC,TG,TGFB2,THBS1,THSD7A,TLK1,TM4SF1,TMX1,TNC,TPCN1,TSPAN5,TUBAL3,UBE3B,UTRN,VDR,VLDLR,VPS13D,WNT5A,ZFR,ZFX,ZFY,ZNF480,ZNF711 | 114 |
| Cellular Movement                                                                                                                                                | migration of connective tissue cells | 0.0000358 |  | -1.003 | CALCRL,CXCL12,CXCR4,DPT,ITGB1BP1,KCNMA1,PGGT1B,RAPGEF3,THBS1                                                                                                                                                                                                                                                                                                                                                                                                                                                                                                                                                                                                                                                       | 9   |
| Cell Signaling,Molecular Transport,Nucleic Acid Metabolism,Small Molecule Biochemistry                                                                           | concentration of cyclic AMP          | 0.0000358 |  | 0.395  | CALCRL,CXCL12,CXCR4,CYP4F2,ENTPD1,HNF1B,LEPR,PTGER2,THBS1                                                                                                                                                                                                                                                                                                                                                                                                                                                                                                                                                                                                                                                          | 9   |

Table G: Gene Functions Data Shown in Figure 6

|                                                                                                                                                                         |                                       |           |  |        |                                                                                                                                                                                                                                                                                                                                                                                                                                                                                                                                                                                             |    |
|-------------------------------------------------------------------------------------------------------------------------------------------------------------------------|---------------------------------------|-----------|--|--------|---------------------------------------------------------------------------------------------------------------------------------------------------------------------------------------------------------------------------------------------------------------------------------------------------------------------------------------------------------------------------------------------------------------------------------------------------------------------------------------------------------------------------------------------------------------------------------------------|----|
| Organismal Development                                                                                                                                                  | abnormal morphology of body cavity    | 0.0000364 |  |        | ADAM10,ADAMTS9,C4A/C4B,CALCRL,CEACAM1,CREB1,CXCR4,DLK1,EDNRA,FERMT1,IQGAP1,JAG1,LTBP1,MBNL1,MBNL2,MECOM,MUC5AC,NUPR1,PTGER2,RAPGEF3,SLCO2A1,SSBP2,TCF7L2,TGFB2,THBS1,USH1C,VDR,WNT5A                                                                                                                                                                                                                                                                                                                                                                                                        | 28 |
| Skeletal and Muscular System Development and Function                                                                                                                   | relaxation of muscle                  | 0.0000372 |  | -0.816 | KCNMA1,MBNL1,MBNL2,PTGER2,THBS1,VDR                                                                                                                                                                                                                                                                                                                                                                                                                                                                                                                                                         | 6  |
| Embryonic Development, Organ Development, Organismal Development, Reproductive System Development and Function, Tissue Development                                      | development of genital organ          | 0.0000376 |  |        | ATRX,CREB1,CXCL12,CXCR4,FHL5,HNF1B,HSF2,ID4,LEPR,NCOA2,NUPR1,PTGER2,SMAD5,TGFB2,VDR,WNT5A,ZFX                                                                                                                                                                                                                                                                                                                                                                                                                                                                                               | 17 |
| Cellular Movement                                                                                                                                                       | migration of breast cancer cell lines | 0.0000384 |  | -1.845 | ANGPT2,CHN2,CPNE3,CXCL12,CXCR4,IQGAP1,MCAM,PDCD4,S100A4,SMAD5,WNT5A                                                                                                                                                                                                                                                                                                                                                                                                                                                                                                                         | 11 |
| Cardiovascular System Development and Function, Cell-To-Cell Signaling and Interaction                                                                                  | adhesion of endothelial cells         | 0.0000391 |  | -0.643 | ADAM10,ANGPT2,CXCL12,CXCR4,EDIL3,FLT1,MCAM,THBS1                                                                                                                                                                                                                                                                                                                                                                                                                                                                                                                                            | 8  |
| Cell Morphology, Tissue Development                                                                                                                                     | tubulation of cells                   | 0.0000391 |  | -0.766 | CLIC4,CXCL12,CXCR4,FLT1,KCNMA1,PATJ,PROX1,TGFB2                                                                                                                                                                                                                                                                                                                                                                                                                                                                                                                                             | 8  |
| Cancer, Neurological Disease, Organismal Injury and Abnormalities                                                                                                       | growth of glioma                      | 0.0000396 |  | -1.342 | CXCL12,CXCR4,DLK1,JAG1,WNT5A                                                                                                                                                                                                                                                                                                                                                                                                                                                                                                                                                                | 5  |
| Cardiovascular System Development and Function, Embryonic Development, Organ Development, Organismal Development, Tissue Development                                    | formation of ventricular septum       | 0.0000397 |  |        | CXCL12,CXCR4,LTBP1,PROX1,TGFB2,WNT5A                                                                                                                                                                                                                                                                                                                                                                                                                                                                                                                                                        | 6  |
| Cellular Development                                                                                                                                                    | differentiation of nervous system     | 0.0000402 |  | -0.282 | CREB1,CXCL12,CXCR4,ID4,JAG1,KCNMA1,NEFH,PROX1,RAPGEF3,S100A4,TCF7L2,TG,TGFB2,TNC,USH1C,WNT5A                                                                                                                                                                                                                                                                                                                                                                                                                                                                                                | 16 |
| Cancer, Dermatological Diseases and Conditions, Organismal Injury and Abnormalities                                                                                     | skin cancer                           | 0.0000409 |  | -0.762 | ABCC9,ABHD6,ABO,ADAM10,ADAMTS9,ALDH6A1,ALLC,ATRX,C4A/C4B,CALCR,CALCRL,CALU,CES2,CHN2,CPE,CPNE3,CXCL12,CYP4F2,CYP4F3,DLK1,EDIL3,EDNRA,EFS,ENPEP,ENTPD1,FAM198B,FAM216A,FERMT1,FGL2,FHL1,FHL5,FILIP1L,FLT1,GPX2,HNRNPL,HSF2,JAG1,KCNMA1,KIF13A,LEPR,LTBP1,MAGI1,MAP4K5,MAST4,MBNL1,MCAM,MECOM,MIA2,MLXIPL,MUC5AC,NCOA2,NEFH,NFASC,OVGP1,PAMR1,PDE4DIP,PLCL2,PRKACB,PROX1,PTGER2,RAPGEF3,RASAL2,RIOK3,S100A4,SEMA4G,SENP7,SLC13A2,SLC22A18,SLC39A4,SLCO2A1,SPAG5,SPTLC3,SULT1C2,SYT1,TCF7L2,TES,TFRC,TG,THBS1,THSD7A,TM4SF1,TNC,TSPAN5,TUBAL3,USH1C,UTRN,VDR,VLDLR,VPS13D,WNT5A,ZFR,ZFX,ZNF711 | 93 |
| Cell Morphology                                                                                                                                                         | sprouting                             | 0.0000419 |  | -1.466 | ADAM10,ANGPT2,ATRX,CREB1,CXCL12,ITGB1BP1,NEFH,PROX1,SEMA6A,SRPX2,STK4,THBS1,TNC,WNT5A                                                                                                                                                                                                                                                                                                                                                                                                                                                                                                       | 14 |
| Cell-To-Cell Signaling and Interaction, Cellular Assembly and Organization, Hematological System Development and Function, Immune Cell Trafficking, Infectious Diseases | fusion of mononuclear leukocytes      | 0.0000425 |  |        | CXCL12,CXCR4,ENTPD1                                                                                                                                                                                                                                                                                                                                                                                                                                                                                                                                                                         | 3  |
| Endocrine System Development and Function                                                                                                                               | glucose tolerance                     | 0.0000427 |  | 0.05   | ABCC9,CEACAM1,CPE,DLK1,GRB10,HNF1B,LEPR,PLCL2,RAPGEF3,TCF7L2,VDR                                                                                                                                                                                                                                                                                                                                                                                                                                                                                                                            | 11 |
| Cancer, Cardiovascular Disease, Organismal Injury and Abnormalities                                                                                                     | vascular tumor                        | 0.000044  |  |        | ANGPT2,CEACAM1,CXCL12,EDNRA,FLT1,JAG1,S100A4,THBS1,VDR                                                                                                                                                                                                                                                                                                                                                                                                                                                                                                                                      | 9  |

Table G: Gene Functions Data Shown in Figure 6

|                                                                                                                    |                                                   |           |  |        |                                                                                                                                                                                                                                                                                                                                                                                                                                                                                                                                                                    |    |
|--------------------------------------------------------------------------------------------------------------------|---------------------------------------------------|-----------|--|--------|--------------------------------------------------------------------------------------------------------------------------------------------------------------------------------------------------------------------------------------------------------------------------------------------------------------------------------------------------------------------------------------------------------------------------------------------------------------------------------------------------------------------------------------------------------------------|----|
| Immunological Disease                                                                                              | systemic autoimmune syndrome                      | 0.000044  |  |        | ADAM10,C4A/C4B,CALCR,CALCRL,CEACAM1,CREB1,CXCL12,CXCR4,CYP4F3,FGL2,FLT1,GRB10,JAG1,MAGI1,NCOA2,PCM1,PDCD4,PTGER2,S100A4,TAF13,TCF7L2,TFRC,TGFB2,THBS1,TNC,VDR,WNT5A                                                                                                                                                                                                                                                                                                                                                                                                | 27 |
| Cancer,Endocrine System Disorders,Organismal Injury and Abnormalities                                              | papillary thyroid carcinoma                       | 0.0000442 |  |        | CES2,CREB1,CXCR4,FLT1,PCM1,TG,THBS1,WNT5A                                                                                                                                                                                                                                                                                                                                                                                                                                                                                                                          | 8  |
| Cardiovascular System Development and Function,Cellular Development,Tissue Development                             | differentiation of endothelial cells              | 0.0000451 |  |        | ANGPT2,CEACAM1,CXCR4,FLT1,JAG1,PROX1                                                                                                                                                                                                                                                                                                                                                                                                                                                                                                                               | 6  |
| Organismal Functions                                                                                               | energy homeostasis                                | 0.0000455 |  | -0.113 | CEACAM1,CPE,CREB1,LEPR,NCOA2,PLCL2,RAPGEF3,TG,VDR                                                                                                                                                                                                                                                                                                                                                                                                                                                                                                                  | 9  |
| Cancer,Dermatological Diseases and Conditions,Organismal Injury and Abnormalities                                  | cutaneous melanoma                                | 0.0000455 |  |        | ABCC9,ABHD6,ABO,ADAM10,ADAMTS9,ALDH6A1,ALLC,ATRX,C4A/C4B,CALCR,CALCRL,CALU,CES2,CHN2,CPE,CPNE3,CYP4F2,CYP4F3,DLK1,EDIL3,EDNRA,EFS,ENPEP,ENTPD1,FAM198B,FAM216A,FERMT1,FGL2,FHL1,FHL5,FILIP1L,FLT1,HNRNPL,HSF2,JAG1,KCNMA1,KIF13A,LEPR,LTBP1,MAGI1,MAP4K5,MAST4,MBNL1,MECOM,MIA2,MLXIPL,MUC5AC,NCOA2,NEFH,NFASC,OVGP1,PAMR1,PDE4DIP,PLCL2,PRKACB,PROX1,PTGER2,RAPGEF3,RASAL2,RIOK3,S100A4,SENP7,SLC13A2,SLC22A18,SLC39A4,SLCO2A1,SPAG5,SPTLC3,SULT1C2,SYT1,TCF7L2,TES,TFRC,TG,THBS1,THSD7A,TM4SF1,TNC,TPAN5,TUBAL3,USH1C,UTRN,VDR,VLDLR,VPS13D,WNT5A,ZFR,ZFX,ZNF711 | 89 |
| Cancer,Cellular Development,Cellular Growth and Proliferation,Organismal Injury and Abnormalities,Tumor Morphology | proliferation of tumor cells                      | 0.0000455 |  | -0.549 | ADAM10,CEACAM1,CXCL12,CXCR4,DLK1,FHL1,JAG1,MCAM,PROX1,TCF7L2,TG,TGFB2,THBS1,VDR,WNT5A                                                                                                                                                                                                                                                                                                                                                                                                                                                                              | 15 |
| Metabolic Disease                                                                                                  | glucose metabolism disorder                       | 0.0000456 |  | -0.305 | ABCC9,ADAMTS9,C4A/C4B,CALCR,CEACAM1,CHN2,CPE,CREB1,CXCL12,CXCR4,CYP4F2,DLK1,EDNRA,ENPEP,FLT1,HNF1B,LEPR,MLXIPL,PDCD4,PLCL2,PROX1,PTGER2,RAPGEF3,S100A4,TAF13,TCF7L2,THBS1,TNC,TSPAN5,VDR                                                                                                                                                                                                                                                                                                                                                                           | 30 |
| Organismal Development                                                                                             | formation of vessel                               | 0.000047  |  | -1.91  | ANGPT2,CREB1,CXCL12,CXCR4,EMP1,FLT1,JAG1,LTBP1,TGFB2                                                                                                                                                                                                                                                                                                                                                                                                                                                                                                               | 9  |
| Cardiovascular System Development and Function,Organismal Development,Tissue Morphology                            | morphology of endothelial tissue                  | 0.0000512 |  |        | CLIC4,CXCR4,FLT1,SMAD5,STK4,TGFB2                                                                                                                                                                                                                                                                                                                                                                                                                                                                                                                                  | 6  |
| Lipid Metabolism,Small Molecule Biochemistry                                                                       | omega-hydroxylation of very long chain fatty acid | 0.0000516 |  |        | CYP4F2,CYP4F3                                                                                                                                                                                                                                                                                                                                                                                                                                                                                                                                                      | 2  |
| Cellular Movement,Immune Cell Trafficking                                                                          | invasion of B cell hybridoma cells                | 0.0000516 |  |        | CXCL12,CXCR4                                                                                                                                                                                                                                                                                                                                                                                                                                                                                                                                                       | 2  |
| Cell Morphology,Cellular Development,Tissue Development                                                            | tubulation of brain cancer cell lines             | 0.0000516 |  |        | CXCL12,CXCR4                                                                                                                                                                                                                                                                                                                                                                                                                                                                                                                                                       | 2  |



Table G: Gene Functions Data Shown in Figure 6

|                                                                                                                                                                                                     |                                               |           |  |        |                                                                                                                                                                                                                                                                                                                                                                                                                                             |    |
|-----------------------------------------------------------------------------------------------------------------------------------------------------------------------------------------------------|-----------------------------------------------|-----------|--|--------|---------------------------------------------------------------------------------------------------------------------------------------------------------------------------------------------------------------------------------------------------------------------------------------------------------------------------------------------------------------------------------------------------------------------------------------------|----|
| Cellular Movement                                                                                                                                                                                   | extravasation of colorectal cancer cell lines | 0.0000516 |  |        | CXCL12,CXCR4                                                                                                                                                                                                                                                                                                                                                                                                                                | 2  |
| Cellular Movement                                                                                                                                                                                   | homing of progenitor cells                    | 0.0000516 |  |        | CXCL12,CXCR4                                                                                                                                                                                                                                                                                                                                                                                                                                | 2  |
| Cell-To-Cell Signaling and Interaction,Cellular Assembly and Organization,Hematological System Development and Function,Immune Cell Trafficking,Infectious Diseases                                 | fusion of thymocytes                          | 0.0000516 |  |        | CXCL12,CXCR4                                                                                                                                                                                                                                                                                                                                                                                                                                | 2  |
| Cellular Movement,Embryonic Development                                                                                                                                                             | migration of dental pulp stem cells           | 0.0000516 |  |        | CXCL12,CXCR4                                                                                                                                                                                                                                                                                                                                                                                                                                | 2  |
| Cell-mediated Immune Response,Cellular Movement,Hematological System Development and Function,Hematopoiesis,Immune Cell Trafficking                                                                 | migration of single positive thymocytes       | 0.0000516 |  |        | CXCL12,HNRNPL                                                                                                                                                                                                                                                                                                                                                                                                                               | 2  |
| Cellular Movement                                                                                                                                                                                   | extravasation of hepatoma cell lines          | 0.0000516 |  |        | CXCL12,CXCR4                                                                                                                                                                                                                                                                                                                                                                                                                                | 2  |
| Amino Acid Metabolism,Molecular Transport,Small Molecule Biochemistry                                                                                                                               | transport of asparagine                       | 0.0000516 |  |        | SLC38A2,SLC38A3                                                                                                                                                                                                                                                                                                                                                                                                                             | 2  |
| Cell-mediated Immune Response,Cellular Movement,Hematological System Development and Function,Hematopoiesis,Immune Cell Trafficking,Inflammatory Response,Lymphoid Tissue Structure and Development | chemorepulsion of thymocytes                  | 0.0000516 |  |        | CXCL12,CXCR4                                                                                                                                                                                                                                                                                                                                                                                                                                | 2  |
| Cancer,Gastrointestinal Disease,Organismal Injury and Abnormalities                                                                                                                                 | colon cancer                                  | 0.0000523 |  |        | ADAM10,ADAMTS9,ALDH6A1,ALLC,ANGPT2,ATRX,CALCR,CEACAM1,CES2,CYP4F2,EDIL3,ELF1,ENPEP,FAM216A,FERMT1,FHL1,FLT1,GGH,GPX2,HNRNPL,JAG1,KCNMA1,KIF13A,LEPR,LTBP1,MAG11,MAP4K5,MAST4,MBNL1,MCAM,MECOM,MIA2,MLXIPL,MUC5AC,NCOA2,NEFH,NFASC,NR1D2,OVGP1,PCM1,PDCD4,PDE4DIP,PGGT1B,RAPGEF3,RASAL2,RIOK3,SEMA4G,SEMA6A,SENP7,SLC13A2,SLC38A2,SLC39A4,SSBP2,SULT1C2,SYT1,TCF7L2,TES,TFRC,TG,THBS1,TNC,TUBAL3,UTRN,VPS13D,WNT5A,ZFR,ZFX,ZFY,ZNF480,ZNF711 | 70 |
| Tissue Development                                                                                                                                                                                  | branching of epithelial tissue                | 0.0000565 |  | -1.284 | ANGPT2,CLIC4,HNF1B,ITGB1BP1,PROX1,SRPX2,TNC                                                                                                                                                                                                                                                                                                                                                                                                 | 7  |
| Cardiovascular System Development and Function                                                                                                                                                      | vascularization                               | 0.0000577 |  | -0.543 | CEACAM1,CLIC4,CXCL12,CXCR4,FLT1,S100A4,SMAD5,STK4,THBS1,VLDLR                                                                                                                                                                                                                                                                                                                                                                               | 10 |
| Cellular Assembly and Organization,Tissue Development                                                                                                                                               | fibrogenesis                                  | 0.0000583 |  | 0.637  | CREB1,CXCL12,EDNRA,FHL1,ITGB1BP1,JAG1,MAG11,NEFH,PDCD4,PROX1,RAPGEF3,STK4,TNC,TPM4                                                                                                                                                                                                                                                                                                                                                          | 14 |

Table G: Gene Functions Data Shown in Figure 6

|                                                                                                                                                   |                                |           |  |        |                                                                                                                                                                                                                                                                                                                                                         |    |
|---------------------------------------------------------------------------------------------------------------------------------------------------|--------------------------------|-----------|--|--------|---------------------------------------------------------------------------------------------------------------------------------------------------------------------------------------------------------------------------------------------------------------------------------------------------------------------------------------------------------|----|
| Cellular Development,Connective Tissue Development and Function,Skeletal and Muscular System Development and Function,Tissue Development          | differentiation of osteoclasts | 0.0000592 |  | -1.195 | CALCR,CEACAM1,CREB1,JAG1,PTGER2,RAPGEF3,TFRC,TNC,WNT5A                                                                                                                                                                                                                                                                                                  | 9  |
| Skeletal and Muscular System Development and Function                                                                                             | muscle contraction             | 0.0000594 |  | 0.816  | ANGPT2,C4A/C4B,CALCRL,CXCR4,EDNRA,ENTPD1,KCNMA1,SMAD5,UTRN,VDR                                                                                                                                                                                                                                                                                          | 10 |
| Cancer,Organismal Injury and Abnormalities                                                                                                        | endometrioid carcinoma         | 0.0000599 |  |        | ABCC9,ABHD6,ANGPT2,ATRX,CES2,CHN2,CPE,CPNE3,CXCL12,CYP4F2,CYP4F3,EIF2S1,ELF1,FAM198B,FILIP1L,FLT1,GRB10,HNRNPL,IQGAP1,JAG1,KCNMA1,KIF13A,MAP4K5,MAST4,MBNL1,MECOM,MUC5AC,NEFH,PDE4DIP,PROX1,RASAL2,RIOK3,SENP7,SLC13A2,SLC22A18,SRPX2,STAG2,TES,TG,THBS1,TM4SF1,TNC,TPCN1,TUBAL3,UBE3B,USH1C,UTRN,VDR,VLDLR,ZFR,ZFX,ZNF277,ZNF480                       | 53 |
| Cancer,Organismal Injury and Abnormalities                                                                                                        | adenoma formation              | 0.0000607 |  |        | ATRX,C4A/C4B,CES2,DPT,ENPEP,ID4,LEPR,MCAM,MECOM,PTGER2,SLC39A4,SSBP2,STAG2,TAF13,TG,THBS1,VDR                                                                                                                                                                                                                                                           | 17 |
| Cancer,Organismal Injury and Abnormalities                                                                                                        | serous neoplasm                | 0.000061  |  |        | ABCC9,ATRX,C4A/C4B,CXCL12,DPT,EDNRA,ENPEP,ENTPD1,FGL2,FILIP1L,KCNMA1,MCAM,MECOM,MUC5AC,PTGER2,SLC39A4,STAG2,TG                                                                                                                                                                                                                                          | 18 |
| Cardiovascular Disease,Cardiovascular System Development and Function,Organ Morphology,Organismal Development,Organismal Injury and Abnormalities | abnormal morphology of heart   | 0.0000611 |  |        | ADAM10,ADAMTS9,CALCRL,CXCR4,EDNRA,JAG1,LTBP1,MBNL1,MBNL2,MECOM,SLCO2A1,TGFB2,THBS1                                                                                                                                                                                                                                                                      | 13 |
| Organismal Injury and Abnormalities,Reproductive System Disease                                                                                   | disorder of pregnancy          | 0.0000616 |  |        | C4A/C4B,CALCRL,CHN2,DLK1,FERMT1,FHL1,FHL5,FLT1,GRB10,MECOM,MSMO1,NCOA2,PTGER2,STK4,TMX1,TNC,VDR                                                                                                                                                                                                                                                         | 17 |
| Endocrine System Disorders,Metabolic Disease                                                                                                      | insulin resistance             | 0.0000633 |  | -0.24  | CEACAM1,CPE,CREB1,DLK1,HNF1B,LEPR,MLXIPL,PLCL2,RAPGEF3,S100A4,THBS1,VDR                                                                                                                                                                                                                                                                                 | 12 |
| Cell Death and Survival                                                                                                                           | cell death                     | 0.0000651 |  | -0.561 | ABCC9,ABO,ADAM10,ANGPT2,ATRX,C4A/C4B,CALCR,CALCRL,CEACAM1,CLIC4,CREB1,CXCL12,CXCR4,DLK1,EDIL3,EDNRA,EIF2S1,ELF1,EMP1,ENTPD1,FGL2,FLT1,GPX2,GRB10,HNF1B,HSF2,JAG1,KCNMA1,LEPR,LTBP1,MAG1,MCAM,MECOM,NANOG,NCOA2,NEFH,NUPR1,PDCD4,PDCD6,PTGER2,RAPGEF3,RETREG1,S100A4,SEMA6A,SLC26A4,SMAD5,SPAG5,STK4,TANK,TCF7L2,TFRC,TGFB2,THBS1,TMX1,TNC,VDR,WNT5A,ZFR | 58 |
| Connective Tissue Disorders,Inflammatory Disease,Inflammatory Response,Organismal Injury and Abnormalities,Skeletal and Muscular Disorders        | inflammation of joint          | 0.0000658 |  | -0.627 | ADAM10,ADAMTS9,C4A/C4B,CALCRL,CPE,CXCL12,CXCR4,CYP4F3,FGL2,FLT1,GRB10,LEPR,MAG1,MUC5AC,NCOA2,PCM1,PTGER2,TAF13,TCF7L2,TFRC,TGFB2,THBS1,TNC,VDR,WNT5A                                                                                                                                                                                                    | 25 |
| Cellular Development,Cellular Growth and Proliferation                                                                                            | proliferation of blood cells   | 0.0000684 |  | 0.982  | CEACAM1,CREB1,CXCL12,CXCR4,EFS,ELF1,FGL2,HNRNPL,JAG1,LEPR,LTBP1,MECOM,PLCL2,SMA D5,STK4,TANK,TFRC,TG,TGFB2,THBS1,VDR,WNT5A                                                                                                                                                                                                                              | 22 |
| Organismal Injury and Abnormalities,Renal and Urological Disease                                                                                  | cystic kidney disease          | 0.0000692 |  |        | ADGRL3,ANGPT2,C4A/C4B,CPE,FHL1,FILIP1L,GPX2,HNF1B,PDCD4,RAPGEF3,VLDLR                                                                                                                                                                                                                                                                                   | 11 |
| Cardiovascular System Development and Function,Cell-To-Cell Signaling and Interaction                                                             | binding of endothelial cells   | 0.0000695 |  | -0.317 | ADAM10,ANGPT2,CXCL12,CXCR4,EDIL3,FLT1,LEPR,MCAM,THBS1                                                                                                                                                                                                                                                                                                   | 9  |
| Cell Signaling,Post-Translational Modification                                                                                                    | activation of Protein kinase   | 0.0000702 |  |        | CEACAM1,CXCR4,EDNRA,IQGAP1,ITGB1BP1,MAP4K5,MDFIC,THBS1,VLDLR,WNT5A                                                                                                                                                                                                                                                                                      | 10 |

Table G: Gene Functions Data Shown in Figure 6

|                                                                                                                                   |                                        |           |  |        |                                                                                                                                                                                                                                                                                                                                             |    |
|-----------------------------------------------------------------------------------------------------------------------------------|----------------------------------------|-----------|--|--------|---------------------------------------------------------------------------------------------------------------------------------------------------------------------------------------------------------------------------------------------------------------------------------------------------------------------------------------------|----|
| Cell-To-Cell Signaling and Interaction,Cellular Movement                                                                          | recruitment of blood cells             | 0.0000739 |  | -0.304 | ADAM10,ANGPT2,C4A/C4B,CXCL12,CXCR4,EDIL3,ENTPD1,FLT1,S100A4,THBS1,TNC,VDR                                                                                                                                                                                                                                                                   | 12 |
| Digestive System Development and Function,Organ Morphology,Organismal Development                                                 | morphology of intestine                | 0.0000741 |  |        | C4A/C4B,CEACAM1,EFS,FERMT1,MUC5AC,TCF7L2,TGFB2,USH1C,VDR,WNT5A                                                                                                                                                                                                                                                                              | 10 |
| Cardiovascular System Development and Function,Digestive System Development and Function,Organismal Development,Tissue Morphology | morphology of bile duct                | 0.000077  |  |        | HNF1B,JAG1,THBS1                                                                                                                                                                                                                                                                                                                            | 3  |
| Skeletal and Muscular System Development and Function                                                                             | function of smooth muscle              | 0.0000775 |  | 0      | ABCC9,ENTPD1,KCNMA1,NCOA2,PTGER2,THBS1                                                                                                                                                                                                                                                                                                      | 6  |
| Digestive System Development and Function                                                                                         | morphology of digestive system         | 0.0000785 |  |        | C4A/C4B,CEACAM1,DLK1,EDNRA,EFS,FERMT1,HNF1B,IQGAP1,JAG1,LEPR,MLXIPL,MUC5AC,RAPGEF3,TCF7L2,TGFB2,THBS1,USH1C,VDR,WNT5A                                                                                                                                                                                                                       | 19 |
| Cancer,Gastrointestinal Disease,Organismal Injury and Abnormalities                                                               | stomach tumor                          | 0.0000802 |  |        | ABCC9,ADAM10,ADAMTS9,ANGPT2,CES2,CXCL12,CYP4F2,FILIP1L,FLT1,HNRNPL,KCNMA1,MAST4,MBNL2,MUC5AC,NCOA2,NFASC,PDE4DIP,SEMA4G,SLC13A2,SPTLC3,SSBP2,TES,TG,THBS1,THSD7A,TNC,UBE3B,UTRN,VLDLR,WNT5A,ZNF480                                                                                                                                          | 31 |
| Cancer,Organismal Injury and Abnormalities                                                                                        | squamous-cell carcinoma                | 0.0000811 |  | -0.218 | ABCC9,ABO,ADAM10,ALLC,ATRX,CALCR,CES2,CHN2,CXCL12,CYP4F3,DPT,EDIL3,ENOSF1,ENPEP,FAM198B,FERMT1,FGL2,FHL5,FILIP1L,GPX2,GRB10,JAG1,KCNMA1,LEPR,MAGI1,MAST4,MBNL1,MBNL2,MCAM,ME2,MECOM,MUC5AC,NEFH,NR1D2,OVGP1,PCM1,PDCD4,PDE4DIP,PROX1,PTGER2,RASA L2,RETREG1,S100A4,SEMA4G,SEMA6A,SLCO2A1,SSBP2,STAG2,TG,THBS1,THSD7A,TM4SF1,TNC,USH1C,WNT5A | 55 |
| Cardiovascular System Development and Function                                                                                    | morphogenesis of cardiovascular system | 0.0000826 |  |        | ANGPT2,CLIC4,CXCR4,FLT1,MECOM,PROX1,SMAD5,TGFB2,THBS1,WNT5A                                                                                                                                                                                                                                                                                 | 10 |
| Developmental Disorder,Hereditary Disorder,Organismal Injury and Abnormalities,Renal and Urological Disease                       | Polycystic Kidney Disease              | 0.0000826 |  |        | ADGRL3,ANGPT2,C4A/C4B,CPE,FHL1,FILIP1L,GPX2,HNF1B,RAPGEF3,VLDLR                                                                                                                                                                                                                                                                             | 10 |
| Cell Cycle                                                                                                                        | cell cycle progression                 | 0.000084  |  | -1.14  | CEACAM1,CHN2,CREB1,CXCL12,DNAJB4,EMP1,FLT1,GRB10,LTBP1,MECOM,MLXIPL,NANOG,NUPR1,PCM1,PGGT1B,PROX1,RAPGEF3,S100A4,SPAG5,SSBP2,TCF7L2,TGFB2,THBS1,TNC,ZFR                                                                                                                                                                                     | 25 |
| Cancer,Organismal Injury and Abnormalities,Reproductive System Disease                                                            | mammary tumor                          | 0.0000855 |  | -0.958 | ABCC9,ABO,ADAMTS9,ANGPT2,ATRX,CES2,CPE,CPNE3,CXCL12,CXCR4,FAM198B,FLT1,JAG1,LEPR,LYVE1,MAGI1,MAST4,MCAM,MECOM,PDCD6,PROX1,PTGER2,S100A4,SEN7,SLC22A18,STAG2,TCF7L2,TES,TGFB2,THBS1,TM4SF1,TNC,UTRN,VDR,VLDLR,VPS13D,WNT5A                                                                                                                   | 37 |
| Cellular Movement                                                                                                                 | migration of leukemia cell lines       | 0.0000868 |  | -1.399 | ADAM10,CXCL12,CXCR4,IQGAP1,TNC,WNT5A                                                                                                                                                                                                                                                                                                        | 6  |
| Cellular Assembly and Organization                                                                                                | formation of cytoskeleton              | 0.0000894 |  | 0      | CREB1,CXCL12,EDNRA,ITGB1BP1,JAG1,MAGI1,NEFH,RAPGEF3,STK4,THBS1,TNC,TPM4,UTRN                                                                                                                                                                                                                                                                | 13 |
| Cellular Movement                                                                                                                 | release of cells                       | 0.0000903 |  |        | CXCL12,CXCR4,SYT1,TFRC                                                                                                                                                                                                                                                                                                                      | 4  |

Table G: Gene Functions Data Shown in Figure 6

|                                                                                                                                                    |                                                 |           |  |        |                                                                                                                                                                                                                                                                                                                                                                                                                                                                                                                                                                                                                                                                                         |     |
|----------------------------------------------------------------------------------------------------------------------------------------------------|-------------------------------------------------|-----------|--|--------|-----------------------------------------------------------------------------------------------------------------------------------------------------------------------------------------------------------------------------------------------------------------------------------------------------------------------------------------------------------------------------------------------------------------------------------------------------------------------------------------------------------------------------------------------------------------------------------------------------------------------------------------------------------------------------------------|-----|
| Cellular Movement,Skeletal and Muscular System Development and Function                                                                            | cell movement of smooth muscle cells            | 0.0000905 |  | -0.89  | ANGPT2,CALCRL,CLIC4,CREB1,FHL1,FLT1,S100A4,THBS1                                                                                                                                                                                                                                                                                                                                                                                                                                                                                                                                                                                                                                        | 8   |
| Cellular Movement,Skeletal and Muscular System Development and Function                                                                            | migration of muscle cells                       | 0.0000905 |  | -1.169 | ANGPT2,CALCRL,CLIC4,FHL1,FLT1,ITGB1BP1,S100A4,THBS1                                                                                                                                                                                                                                                                                                                                                                                                                                                                                                                                                                                                                                     | 8   |
| Developmental Disorder,Organismal Injury and Abnormalities                                                                                         | congenital malformation of genitourinary system | 0.0000911 |  | 0      | ADGRL3,ANGPT2,ATRX,C4A/C4B,CPE,FHL1,FILIP1L,GPX2,HNF1B,RAPGEF3,TGFB2,VDR,VLDLR                                                                                                                                                                                                                                                                                                                                                                                                                                                                                                                                                                                                          | 13  |
| Cardiovascular Disease,Cardiovascular System Development and Function,Organismal Development,Organismal Injury and Abnormalities,Tissue Morphology | abnormal morphology of endothelial tissue       | 0.0000915 |  |        | CLIC4,FLT1,SMAD5,STK4,TGFB2                                                                                                                                                                                                                                                                                                                                                                                                                                                                                                                                                                                                                                                             | 5   |
| Cellular Development,Cellular Growth and Proliferation,Hematological System Development and Function,Lymphoid Tissue Structure and Development     | cell proliferation of T lymphocytes             | 0.0000926 |  | 0.773  | CEACAM1,CREB1,CXCL12,CXCR4,EFS,ELF1,FGL2,HNRNPL,JAG1,LEPR,LTBP1,STK4,TFRC,TG,TGFB2,THBS1,VDR                                                                                                                                                                                                                                                                                                                                                                                                                                                                                                                                                                                            | 17  |
| Cancer,Gastrointestinal Disease,Organismal Injury and Abnormalities                                                                                | malignant neoplasm of large intestine           | 0.0000931 |  |        | ABCC9,ADAM10,ADAMTS9,ALDH6A1,ALLC,ANGPT2,ATRX,CALCR,CALCRL,CALU,CDC40,CEACAM1,CES2,CREB1,CXCL12,CYP4F2,DLK1,DNAJB4,DPT,EDIL3,EFS,ELF1,EMP1,ENOSF1,ENPEP,FAM198B,FAM216A,FERMT1,FHL1,FHL5,FILIP1L,FLT1,GGH,GPX2,GRB10,HNRNPL,IQGAP1,JAG1,KCNMA1,KIF13A,LEPR,LHPP,LTBP1,MAG1,MAP4K5,MAST4,MBNL1,MBNL2,MCAM,MECOM,MIA2,MLXIPL,MUC5AC,NCOA2,NEFH,NFASC,NR1D2,OVGP1,PAMR1,PCM1,PCDC4,PDE4DIP,PGGT1B,PLCL2,PROX1,RAPGEF3,RASAL2,RIOK3,S100A4,SEMA4G,SEMA6A,SENP7,SLC13A2,SLC26A4,SLC38A2,SLC39A4,SLCO2A1,SPAG5,SRPX2,SSBP2,STAG2,STK4,SULT1C2,SYT1,TAF13,TCF7L2,TES,TFRC,TG,TGFB2,THBS1,THSD7A,TLK1,TM4SF1,TMX1,TNC,TSPAN5,TUBAL3,UBE3B,UTRN,VDR,VLDLR,VPS13D,WNT5A,ZFR,ZFX,ZFY,ZNF480,ZNF711 | 109 |
| Molecular Transport                                                                                                                                | quantity of metal                               | 0.0000946 |  | -1.305 | ANGPT2,CALCR,CXCL12,CXCR4,EDNRA,EIF2S1,ENTPD1,LTBP1,MCAM,PTGER2,RAPGEF3,S100A4,TFRC,VDR,WNT5A                                                                                                                                                                                                                                                                                                                                                                                                                                                                                                                                                                                           | 15  |
| Connective Tissue Development and Function,Tissue Morphology                                                                                       | quantity of connective tissue                   | 0.0000968 |  | 0.382  | ANGPT2,CALCR,CEACAM1,CPE,DLK1,DPT,ID4,ITGB1BP1,LEPR,MLXIPL,NCOA2,PLCL2,RAPGEF3,SMAD5,TFRC,VDR,WNT5A                                                                                                                                                                                                                                                                                                                                                                                                                                                                                                                                                                                     | 17  |
| Organismal Development                                                                                                                             | morphology of head                              | 0.0000976 |  |        | ADAMTS9,ATRX,CLIC4,CXCL12,CXCR4,DLK1,DPT,EDNRA,ENTPD1,HSF2,ITGB1BP1,JAG1,LEPR,MECOM,MUC5AC,S100A4,SLC26A4,SMAD5,TCF7L2,TGFB2,THBS1,USH1C,VLDLR,WNT5A                                                                                                                                                                                                                                                                                                                                                                                                                                                                                                                                    | 24  |
| Cancer,Gastrointestinal Disease,Hepatic System Disease,Organismal Injury and Abnormalities                                                         | liver cancer                                    | 0.0000984 |  | 1.342  | ABCC9,ANGPT2,ATRX,BAG2,CALCRL,CDC40,CEACAM1,CES2,CHN2,CPNE3,CREB1,CXCL12,CXCR4,DPT,EDIL3,EDNRA,EFS,ENTPD1,FERMT1,FHL1,FLT1,GPX2,GRB10,ID4,IQGAP1,JAG1,KCNMA1,LEPR,LYVE1,MAST4,MDFIC,ME2,MECOM,MIA2,MLXIPL,MUC5AC,NCOA2,NUPR1,OVGP1,PAMR1,PDE4DIP,PLCL2,PROX1,PROZ,RAB23,RAPGEF3,RASAL2,RIOK3,S100A4,SEMA6A,SLC26A4,SLC38A2,SLC39A4,SRPX2,STAG2,TCF7L2,TG,TGFB2,THBS1,TLK1,TPCN1,UBE3B,USH1C,UTRN,VDR,VLDLR,VPS13D,ZFR,ZNF277                                                                                                                                                                                                                                                            | 69  |
| Cardiovascular System Development and Function,Cell Morphology,Organismal Development,Tissue Morphology                                            | morphology of endothelial cells                 | 0.0000987 |  |        | CLIC4,CXCR4,FLT1,SMAD5,STK4                                                                                                                                                                                                                                                                                                                                                                                                                                                                                                                                                                                                                                                             | 5   |

Table G: Gene Functions Data Shown in Figure 6

|                                                                                                                                                                                                                                |                                               |           |  |        |                                                                                                                                                                                                                                         |    |
|--------------------------------------------------------------------------------------------------------------------------------------------------------------------------------------------------------------------------------|-----------------------------------------------|-----------|--|--------|-----------------------------------------------------------------------------------------------------------------------------------------------------------------------------------------------------------------------------------------|----|
| Cardiovascular System Development and Function, Cellular Movement                                                                                                                                                              | cell movement of endothelial progenitor cells | 0.0000996 |  |        | CXCL12, MCAM, PROX1                                                                                                                                                                                                                     | 3  |
| Cardiovascular Disease, Hematological Disease, Organismal Injury and Abnormalities                                                                                                                                             | thrombus                                      | 0.0001    |  | -1.573 | ABO, ANGPT2, CEACAM1, EDNRA, ENTPD1, PROZ, PTGER2, THBS1, VDR                                                                                                                                                                           | 9  |
| Cardiovascular System Development and Function, Organ Morphology, Organismal Development                                                                                                                                       | morphology of heart ventricle                 | 0.000101  |  |        | ANGPT2, CXCL12, CXCR4, MBNL1, MBNL2, RAPGEF3, SLCO2A1, STK4, TGFB2, THBS1, VDR                                                                                                                                                          | 11 |
| Cardiovascular System Development and Function, Embryonic Development, Hematological System Development and Function, Lymphoid Tissue Structure and Development, Organ Development, Organismal Development, Tissue Development | development of lymph vessel                   | 0.000102  |  |        | ANGPT2, CXCL12, FLT1, PROX1                                                                                                                                                                                                             | 4  |
| Cardiovascular Disease, Cardiovascular System Development and Function, Organ Morphology, Organismal Development, Organismal Injury and Abnormalities                                                                          | enlargement of heart                          | 0.000104  |  |        | ABCC9, ANGPT2, CREB1, CXCL12, EDNRA, FLT1, LEPR, MBNL1, MBNL2, RAPGEF3, TG, VDR                                                                                                                                                         | 12 |
| Developmental Disorder, Hereditary Disorder, Organismal Injury and Abnormalities, Renal and Urological Disease                                                                                                                 | autosomal dominant polycystic kidney disease  | 0.000108  |  |        | ADGRL3, ANGPT2, CPE, FHL1, FILIP1L, VLDLR                                                                                                                                                                                               | 6  |
| Cancer, Endocrine System Disorders, Organismal Injury and Abnormalities                                                                                                                                                        | thyroid gland tumor                           | 0.00011   |  |        | AMY1C (includes others), ANGPT2, CES2, CREB1, CXCR4, FLT1, MIA2, NEFH, PCM1, PDCD6, PDE4DIP, TAF13, TG, THBS1, UTRN, WNT5A                                                                                                              | 16 |
| Cancer, Hematological Disease, Organismal Injury and Abnormalities                                                                                                                                                             | lymphocytic neoplasm                          | 0.000112  |  | 1.457  | ABCC9, ADAMTS9, ANGPT2, BAG2, CXCL12, CXCR4, DPT, FERMT1, FILIP1L, FLT1, HIST1H2BK, HNF1B, IQGAP1, LTBP1, MAGI1, MAP4K5, MCAM, MIA2, MLXIPL, MSMO1, NCOA2, PDCD4, RSPH14, S100A4, SMAD5, SSBP2, TAF13, TFRC, TGFB2, THBS1, TLK1, ZNF711 | 32 |
| Cell-To-Cell Signaling and Interaction                                                                                                                                                                                         | activation of tumor cell lines                | 0.000114  |  | -0.861 | ANGPT2, CXCR4, ENPEP, IQGAP1, THBS1, WNT5A                                                                                                                                                                                              | 6  |
| Organismal Development                                                                                                                                                                                                         | growth of organism                            | 0.000115  |  | -0.495 | ATRX, CLIC4, CREB1, CXCL12, DLK1, FLT1, GRB10, HNF1B, ID4, JAG1, KCNMA1, LEPR, NANOG, S100A4, STK4, TCF7L2, TFRC, TNC, VDR, WNT5A, ZFX                                                                                                  | 21 |
| Cardiovascular System Development and Function, Organismal Development                                                                                                                                                         | formation of blood vessel                     | 0.000115  |  | -1.941 | CREB1, CXCL12, CXCR4, EMP1, FLT1, JAG1, LTBP1, TGFB2                                                                                                                                                                                    | 8  |
| Cardiovascular System Development and Function, Hematological System Development and Function                                                                                                                                  | blood pressure                                | 0.000116  |  | -0.429 | ABCC9, ANGPT2, CXCL12, CYP4F2, EDNRA, KCNMA1, LEPR, PTGER2, STK4, THBS1, VDR                                                                                                                                                            | 11 |
| Cancer, Gastrointestinal Disease, Organismal Injury and Abnormalities                                                                                                                                                          | oral cancer                                   | 0.000119  |  |        | ADAM10, CXCL12, DPT, EDIL3, ENPEP, PRKACB, SSBP2, TLK1, TM4SF1, TNC                                                                                                                                                                     | 10 |

Table G: Gene Functions Data Shown in Figure 6

|                                                                                                                                                                                                                   |                                               |          |  |        |                                                                                                                                                                                                                                                                                                                                                                                                                                    |    |
|-------------------------------------------------------------------------------------------------------------------------------------------------------------------------------------------------------------------|-----------------------------------------------|----------|--|--------|------------------------------------------------------------------------------------------------------------------------------------------------------------------------------------------------------------------------------------------------------------------------------------------------------------------------------------------------------------------------------------------------------------------------------------|----|
| Tissue Morphology                                                                                                                                                                                                 | morphology of connective tissue               | 0.00012  |  |        | ADAM10,CEACAM1,DLK1,DPT,JAG1,LEPR,MECOM,MLXIPL,NCOA2,RAPGEF3,S100A4,TFRC,TG,TGF B2,THBS1,VDR,VLDLR,WNT5A                                                                                                                                                                                                                                                                                                                           | 18 |
| Cellular Growth and Proliferation,Tissue Development                                                                                                                                                              | proliferation of epithelial cells             | 0.000121 |  | -0.235 | CEACAM1,CXCL12,CXCR4,EDNRA,FERMT1,FLT1,HNF1B,NCOA2,PROX1,PTGER2,TCF7L2,TGFB2,THBS1,VDR,WNT5A                                                                                                                                                                                                                                                                                                                                       | 15 |
| Cancer,Gastrointestinal Disease,Hepatic System Disease,Organismal Injury and Abnormalities                                                                                                                        | liver tumor                                   | 0.000123 |  | 1.342  | ABCC9,ANGPT2,ATRX,BAG2,CALCRL,CALU,CDC40,CEACAM1,CES2,CHN2,CPNE3,CREB1,CXCL12,CXCR4,DPT,EDIL3,EDNRA,EFS,ENTPD1,FERMT1,FHL1,FLT1,GPX2,GRB10,ID4,IQGAP1,JAG1,KCNMA1,LEPR,LYVE1,MAST4,MDFIC,ME2,MECOM,MIA2,MLXIPL,MUC5AC,NCOA2,NUPR1,OVGP1,PAMR1,PD E4DIP,PLCL2,PROX1,PROZ,RAB23,RAPGEF3,RASAL2,RIOK3,S100A4,SEMA6A,SLC26A4,SLC38A2,SLC39A4,SRPX2,STAG2,TCF7L2,TG,TGFB2,THBS1,TLK1,TPCN1,UBE3B,USH1C,UTRN,VDR,VLDLR,VPS13D,ZFR,ZNF277 | 70 |
| Embryonic Development,Hematological System Development and Function,Lymphoid Tissue Structure and Development,Organ Development,Organismal Development,Tissue Development                                         | lymphangiogenesis                             | 0.000123 |  | -1.154 | ANGPT2,CXCL12,FLT1,LYVE1,PROX1                                                                                                                                                                                                                                                                                                                                                                                                     | 5  |
| Inflammatory Response,Organismal Injury and Abnormalities                                                                                                                                                         | inflammation of organ                         | 0.000123 |  | 0.201  | ABHD6,ANGPT2,C4A/C4B,CEACAM1,CREB1,CXCL12,CXCR4,EDNRA,EFS,ELF1,ENTPD1,FERMT1,FLT1,GPX2,HSF2,JAG1,LEPR,MCAM,PDCD4,PTGER2,RAPGEF3,S100A4,SLC39A4,TAF13,TANK,TFRC,THBS1,UTRN,VDR                                                                                                                                                                                                                                                      | 29 |
| Cancer,Organismal Injury and Abnormalities,Respiratory Disease                                                                                                                                                    | lung cancer                                   | 0.000124 |  | 1.114  | ATRX,CEACAM1,CES2,CHN2,CXCR4,DLK1,DNAJB4,DPT,FERMT1,FHL1,FLT1,GRB10,KCNMA1,LEPR,LTBP1,MAG11,MAP4K5,MAST4,MECOM,NCOA2,NUPR1,PDCD4,PDCD6,S100A4,SLC22A18,SSBP2,STAG2,TG,THBS1,THSD7A,UTRN,WNT5A                                                                                                                                                                                                                                      | 32 |
| Cancer,Organismal Injury and Abnormalities                                                                                                                                                                        | metastatic solid tumor                        | 0.000126 |  | -0.369 | ANGPT2,C4A/C4B,CXCL12,CXCR4,EFS,EMP1,FLT1,JAG1,MAG11,MAP4K5,S100A4,TGFB2,THBS1,TM4SF1,TNC,VDR,WNT5A                                                                                                                                                                                                                                                                                                                                | 17 |
| Cancer,Neurological Disease,Organismal Injury and Abnormalities                                                                                                                                                   | glioblastoma                                  | 0.000126 |  |        | ANGPT2,ATRX,FLT1,KCNMA1,LHPP,MECOM,S100A4,STAG2,TAF13,TCF7L2,TGFB2,TNC,USH1C                                                                                                                                                                                                                                                                                                                                                       | 13 |
| Cancer,Cellular Movement,Organismal Injury and Abnormalities,Tumor Morphology                                                                                                                                     | invasion of melanoma cells                    | 0.000126 |  |        | CEACAM1,CXCL12,MCAM                                                                                                                                                                                                                                                                                                                                                                                                                | 3  |
| Cancer,Cellular Movement,Organismal Injury and Abnormalities,Tumor Morphology                                                                                                                                     | invasion of tumor cells                       | 0.000128 |  | -1.142 | CEACAM1,CXCL12,CXCR4,MCAM,PDCD4,PROX1,THBS1,WNT5A                                                                                                                                                                                                                                                                                                                                                                                  | 8  |
| Cardiovascular Disease,Cardiovascular System Development and Function,Organismal Injury and Abnormalities,Skeletal and Muscular Disorders,Skeletal and Muscular System Development and Function,Tissue Morphology | abnormal morphology of vascular smooth muscle | 0.000128 |  |        | CALCRL,CXCL12,CXCR4,LTBP1                                                                                                                                                                                                                                                                                                                                                                                                          | 4  |
| Digestive System Development and Function,Gastrointestinal Disease,Organ Morphology,Organismal Development,Organismal Injury and Abnormalities                                                                    | abnormal morphology of intestine              | 0.000131 |  |        | C4A/C4B,CEACAM1,FERMT1,MUC5AC,TCF7L2,TGFB2,USH1C,VDR,WNT5A                                                                                                                                                                                                                                                                                                                                                                         | 9  |
| Cellular Development,Connective Tissue Development and Function,Tissue Development                                                                                                                                | differentiation of adipocytes                 | 0.000138 |  | -0.146 | ALDH6A1,CREB1,DLK1,ID4,JAG1,MECOM,STK4,TCF7L2,VDR,WNT5A                                                                                                                                                                                                                                                                                                                                                                            | 10 |

Table G: Gene Functions Data Shown in Figure 6

|                                                                                                                                                   |                                             |          |  |        |                                                                                                                                                                                                                                                                                                                                    |    |
|---------------------------------------------------------------------------------------------------------------------------------------------------|---------------------------------------------|----------|--|--------|------------------------------------------------------------------------------------------------------------------------------------------------------------------------------------------------------------------------------------------------------------------------------------------------------------------------------------|----|
| Developmental Disorder, Embryonic Development, Organismal Development, Tissue Morphology                                                          | abnormal morphology of embryonic tissue     | 0.00014  |  |        | ADAM10, ADAMTS9, CXCR4, EDNRA, HNF1B, JAG1, LTBP1, MECOM, PRKACB, SLC26A4, SMAD5, STK4, TFR, TGFB2, VLDLR, WNT5A                                                                                                                                                                                                                   | 16 |
| Cell Death and Survival                                                                                                                           | apoptosis                                   | 0.000141 |  | 0.437  | ABO, ANGPT2, ATRX, CALCR, CALCRL, CEACAM1, CLIC4, CREB1, CXCL12, CXCR4, EDIL3, EDNRA, EIF2S1, ENTPD1, FGL2, FLT1, GPX2, GRB10, HNF1B, HSF2, JAG1, KCNMA1, LEPR, LTBP1, MCAM, MECOM, NANOG, NCOA2, NUPR1, PDCD4, PDCD6, PTGER2, RAPGEF3, RETREG1, S100A4, SMAD5, SPAG5, STK4, TCF7L2, TFR, TGFB2, THBS1, TMX1, TNC, VDR, WNT5A, ZFR | 47 |
| Cancer, Cellular Development, Cellular Growth and Proliferation, Neurological Disease, Organismal Injury and Abnormalities, Tumor Morphology      | proliferation of glioma cells               | 0.000142 |  | -1     | CXCR4, DLK1, JAG1, WNT5A                                                                                                                                                                                                                                                                                                           | 4  |
| Cellular Growth and Proliferation                                                                                                                 | colony formation                            | 0.000147 |  | -0.126 | CEACAM1, CXCL12, FLT1, ID4, IQGAP1, MCAM, MECOM, NANOG, NUPR1, S100A4, SMAD5, STK4, TCF7L2, TES, TGFB2, TNC                                                                                                                                                                                                                        | 16 |
| Cellular Development, Nervous System Development and Function                                                                                     | differentiation of oligodendrocytes         | 0.000147 |  | 0.808  | CXCR4, ID4, RAPGEF3, TCF7L2, TG, TNC                                                                                                                                                                                                                                                                                               | 6  |
| Cancer                                                                                                                                            | hyperplasia of secretory structure          | 0.000151 |  | -0.342 | CXCL12, PTGER2, RAPGEF3, TCF7L2, TG, TGFB2, THBS1, VDR                                                                                                                                                                                                                                                                             | 8  |
| Cellular Movement                                                                                                                                 | dissemination of cells                      | 0.000151 |  |        | ANGPT2, CXCL12, CXCR4, SENP7, WNT5A                                                                                                                                                                                                                                                                                                | 5  |
| Cancer, Gastrointestinal Disease, Organismal Injury and Abnormalities                                                                             | gastric cancer                              | 0.000152 |  |        | ABCC9, ADAM10, ADAMTS9, ANGPT2, CES2, CXCL12, CYP4F2, FILIP1L, FLT1, HNRNPL, KCNMA1, MAST4, MBNL2, MUC5AC, NCOA2, NFASC, PDE4DIP, SEMA4G, SLC13A2, SPTLC3, SSBP2, TG, THBS1, THSD7A, TNC, UBE3B, UTRN, VLDLR, WNT5A, ZNF480                                                                                                        | 30 |
| Cellular Development, Cellular Growth and Proliferation, Hematological System Development and Function, Lymphoid Tissue Structure and Development | proliferation of lymphocytes                | 0.000152 |  | 1.263  | CEACAM1, CREB1, CXCL12, CXCR4, EFS, ELF1, FGL2, HNRNPL, JAG1, LEPR, LTBP1, PLCL2, STK4, TANK, TFR, TG, TGFB2, THBS1, VDR                                                                                                                                                                                                           | 19 |
| Cell-To-Cell Signaling and Interaction, Hematological System Development and Function                                                             | binding of CD4+ T-lymphocytes               | 0.000154 |  |        | CXCL12, CXCR4                                                                                                                                                                                                                                                                                                                      | 2  |
| Small Molecule Biochemistry                                                                                                                       | abnormal activity of renin                  | 0.000154 |  |        | PTGER2, VDR                                                                                                                                                                                                                                                                                                                        | 2  |
| Cellular Function and Maintenance                                                                                                                 | retention of myeloid cells                  | 0.000154 |  |        | CXCL12, CXCR4                                                                                                                                                                                                                                                                                                                      | 2  |
| Cellular Function and Maintenance, Hematological System Development and Function, Hematopoiesis                                                   | retention of hematopoietic progenitor cells | 0.000154 |  |        | CXCL12, CXCR4                                                                                                                                                                                                                                                                                                                      | 2  |

Table G: Gene Functions Data Shown in Figure 6

|                                                                                                                                                                    |                                                        |          |        |  |                                                                                                          |    |
|--------------------------------------------------------------------------------------------------------------------------------------------------------------------|--------------------------------------------------------|----------|--------|--|----------------------------------------------------------------------------------------------------------|----|
| Cardiovascular System Development and Function,Cellular Movement,Immune Cell Trafficking,Lymphoid Tissue Structure and Development                                 | chemotaxis of lymphatic endothelial cells              | 0.000154 |        |  | CXCL12,PROX1                                                                                             | 2  |
| Cellular Movement                                                                                                                                                  | migration of gastrointestinal stromal tumor cell lines | 0.000154 |        |  | CXCL12,CXCR4                                                                                             | 2  |
| Cell Morphology                                                                                                                                                    | polarization of brain cancer cell lines                | 0.000154 |        |  | CXCL12,CXCR4                                                                                             | 2  |
| Cellular Movement,Nervous System Development and Function                                                                                                          | chemotaxis of cerebellar granule cell                  | 0.000154 |        |  | CXCL12,CXCR4                                                                                             | 2  |
| Cellular Assembly and Organization,Tissue Development                                                                                                              | formation of filaments                                 | 0.000154 | 0.392  |  | CREB1,CXCL12,EDNRA,FHL1,ITGB1BP1,JAG1,MAGI1,NEFH,PROX1,RAPGEF3,STK4,TNC,TPM4                             | 13 |
| Cellular Movement                                                                                                                                                  | chemorepulsion                                         | 0.000158 |        |  | CXCL12,CXCR4,FLT1,WNT5A                                                                                  | 4  |
| Cell-mediated Immune Response,Cellular Movement,Hematological System Development and Function,Immune Cell Trafficking                                              | T cell migration                                       | 0.00016  | -1.328 |  | ADAM10,CEACAM1,CXCL12,CXCR4,EFS,HNRNPL,MCAM,S100A4,THBS1,WNT5A                                           | 10 |
| Cancer,Organismal Injury and Abnormalities                                                                                                                         | serous adenocarcinoma                                  | 0.000168 |        |  | ATRX,C4A/C4B,CXCL12,DPT,EDNRA,ENPEP,ENTPD1,FGL2,FILIP1L,KCNMA1,MCAM,MECOM,MUC5AC,PTGER2,SLC39A4,STAG2,TG | 17 |
| Cardiovascular System Development and Function,Organ Morphology,Organismal Development                                                                             | enlargement of heart ventricle                         | 0.00017  |        |  | ANGPT2,CXCL12,MBNL1,MBNL2,RAPGEF3,STK4,VDR                                                               | 7  |
| Cancer,Gastrointestinal Disease,Organismal Injury and Abnormalities                                                                                                | growth of digestive organ tumor                        | 0.00017  | -0.492 |  | ADAM10,CREB1,CXCR4,LEPR,PROX1,THBS1                                                                      | 6  |
| Cancer,Organismal Injury and Abnormalities                                                                                                                         | blue round small cell tumor                            | 0.000175 |        |  | C4A/C4B,CALCR,CXCR4,FERMT1,KCNMA1,MUC5AC,NCOA2,OVGP1,PDCD6,PDE4DIP,SLC22A18,SLC39A4,TG,THBS1,UTRN,WNT5A  | 16 |
| Cardiovascular Disease,Cardiovascular System Development and Function,Cell Morphology,Organismal Development,Organismal Injury and Abnormalities,Tissue Morphology | abnormal morphology of vascular endothelial cells      | 0.000175 |        |  | CLIC4,FLT1,SMAD5,STK4                                                                                    | 4  |
| Organismal Injury and Abnormalities,Tissue Morphology                                                                                                              | abnormal morphology of epithelial tissue               | 0.000188 |        |  | CLIC4,FLT1,MUC5AC,NCOA2,SLC26A4,SMAD5,STK4,TCF7L2,TGFB2,THBS1,USH1C,VDR,VLDLR                            | 13 |



Table G: Gene Functions Data Shown in Figure 6

|                                                                                                                                |                                        |          |  |        |                                                                                                                                                                                                                                                                                                                                                                                                                                                                         |    |
|--------------------------------------------------------------------------------------------------------------------------------|----------------------------------------|----------|--|--------|-------------------------------------------------------------------------------------------------------------------------------------------------------------------------------------------------------------------------------------------------------------------------------------------------------------------------------------------------------------------------------------------------------------------------------------------------------------------------|----|
| Cellular Movement                                                                                                              | migration of eye cell lines            | 0.000192 |  |        | FLT1,PDE4DIP,TGFB2                                                                                                                                                                                                                                                                                                                                                                                                                                                      | 3  |
| Infectious Diseases                                                                                                            | viral entry by Retroviridae            | 0.000192 |  |        | CXCL12,CXCR4,TFRC                                                                                                                                                                                                                                                                                                                                                                                                                                                       | 3  |
| Cellular Assembly and Organization                                                                                             | formation of plasma membrane           | 0.000194 |  | -1.953 | ADGRL3,CREB1,GABPA,HNF1B,IQGAP1,SRPX2,THBS1,TNC,UTRN,WNT5A                                                                                                                                                                                                                                                                                                                                                                                                              | 10 |
| Cancer,Gastrointestinal Disease,Organismal Injury and Abnormalities                                                            | salivary gland tumor                   | 0.000197 |  |        | LEPR,PRKACB,SSBP2,TLK1,TNC                                                                                                                                                                                                                                                                                                                                                                                                                                              | 5  |
| Cancer,Gastrointestinal Disease,Organismal Injury and Abnormalities                                                            | tumorigenesis of digestive organ tumor | 0.000197 |  |        | ABCC9,ADAM10,ADAMTS9,ALDH6A1,ALLC,ANGPT2,ATRX,CALCR,CEACAM1,CES2,CYP4F2,EDIL3,ELF1,ENPEP,FAM216A,FERMT1,FHL1,FILIP1L,FLT1,HNRNPL,JAG1,KCNMA1,KIF13A,LEPR,LTBP1,MAGI1,MAP4K5,MAST4,MBNL1,MBNL2,MECOM,MIA2,MLXIPL,MUC5AC,NCOA2,NEFH,NFASC,NR1D2,OVGP1,PCM1,PDE4DIP,PGGT1B,RAPGEF3,RASAL2,RIOK3,SEMA4G,SEMA6A,SENP7,SLC13A2,SLC38A2,SLC39A4,SPTLC3,SSBP2,STAG2,SYT1,TCF7L2,TES,TFRC,TG,THBS1,THSD7A,TNC,TUBAL3,UBE3B,UTRN,VDR,VLDLR,VPS13D,WNT5A,ZFR,ZFX,ZFY,ZNF480,ZNF711 | 74 |
| Connective Tissue Development and Function,Tissue Morphology                                                                   | quantity of adipose tissue             | 0.000199 |  | 0.736  | CEACAM1,CPE,DLK1,DPT,ID4,LEPR,MLXIPL,NCOA2,RAPGEF3,VDR                                                                                                                                                                                                                                                                                                                                                                                                                  | 10 |
| Cardiovascular Disease                                                                                                         | disorder of blood pressure             | 0.000205 |  | 0      | ABCC9,ANGPT2,CHN2,CXCR4,EDNRA,FERMT1,FHL1,FHL5,FLT1,LEPR,MECOM,MSMO1,PTGER2,TAFF13,TMX1,TNC,VDR,VLDLR                                                                                                                                                                                                                                                                                                                                                                   | 18 |
| Cancer,Organismal Injury and Abnormalities,Reproductive System Disease                                                         | breast cancer                          | 0.000206 |  |        | ABCC9,ABO,ADAMTS9,ANGPT2,ATRX,CES2,CPE,CXCL12,CXCR4,FAM198B,FLT1,JAG1,LEPR,LYVE1,MAGI1,MAST4,MCAM,MECOM,PDCD6,PROX1,S100A4,SENP7,SLC22A18,STAG2,TCF7L2,TES,TGFB2,THBS1,TNC,UTRN,VDR,VLDLR,VPS13D,WNT5A                                                                                                                                                                                                                                                                  | 34 |
| Cancer,Gastrointestinal Disease,Hepatic System Disease,Organismal Injury and Abnormalities                                     | liver carcinoma                        | 0.000206 |  | 1.732  | ABCC9,ATRX,BAG2,CALCRL,CDC40,CEACAM1,CES2,CHN2,CPNE3,CREB1,CXCL12,CXCR4,DPT,EDIL3,EDNRA,EF3,FERMT1,FHL1,FLT1,GPX2,GRB10,ID4,IQGAP1,JAG1,KCNMA1,LEPR,LYVE1,MAST4,MDFIC,ME2,MECOM,MIA2,MLXIPL,MUC5AC,NCOA2,NUPR1,OVGP1,PAMR1,PDE4DIP,PLCL2,PROX1,PROZ,RAB23,RAPGEF3,RASAL2,RIOK3,S100A4,SEMA6A,SLC26A4,SLC38A2,SLC39A4,SRPX2,STAG2,TCF7L2,TG,TGFB2,THBS1,TLK1,TPCN1,UBE3B,USH1C,VDR,VLDLR,VPS13D,ZFR,ZNF277                                                               | 66 |
| Cancer,Gastrointestinal Disease,Organismal Injury and Abnormalities                                                            | oral cavity carcinoma                  | 0.000208 |  |        | ADAM10,CXCL12,DPT,EDIL3,ENPEP,PRKACB,TLK1,TM4SF1,TNC                                                                                                                                                                                                                                                                                                                                                                                                                    | 9  |
| Embryonic Development,Organ Development,Organismal Development,Reproductive System Development and Function,Tissue Development | gonadogenesis                          | 0.000209 |  |        | ATRX,CREB1,CXCL12,CXCR4,FHL5,HSF2,LEPR,NCOA2,NUPR1,PTGER2,SMAD5,TGFB2,VDR,WNT5A,ZFX                                                                                                                                                                                                                                                                                                                                                                                     | 15 |
| Cancer,Organismal Injury and Abnormalities                                                                                     | acinar-cell carcinoma                  | 0.000214 |  |        | ADAM10,PRKACB,TLK1,TNC                                                                                                                                                                                                                                                                                                                                                                                                                                                  | 4  |
| Cellular Development,Cellular Growth and Proliferation,Nervous System Development and Function,Tissue Development              | development of neurons                 | 0.000222 |  | -0.751 | ADAM10,ADGRL3,ATRX,CREB1,CXCL12,CXCR4,DLK1,EDNRA,GABPA,NEFH,PROX1,RAPGEF3,SEMA6A,SRPX2,TGFB2,THBS1,TNC,UTRN,VLDLR,WNT5A                                                                                                                                                                                                                                                                                                                                                 | 20 |

Table G: Gene Functions Data Shown in Figure 6

|                                                                                                                                                                                   |                                       |          |  |        |                                                                                                                                                                                                                                                                                                 |    |
|-----------------------------------------------------------------------------------------------------------------------------------------------------------------------------------|---------------------------------------|----------|--|--------|-------------------------------------------------------------------------------------------------------------------------------------------------------------------------------------------------------------------------------------------------------------------------------------------------|----|
| Cancer,Gastrointestinal Disease,Organismal Injury and Abnormalities                                                                                                               | pancreatobiliary tumor                | 0.000224 |  |        | ABCC9,ABO,ADAM10,ATRX,CXCL12,CXCR4,CYP4F2,ENOSF1,FERMT1,FHL1,FLT1,GRB10,HNRNP1,IQGAP1,ITGB1BP1,LEPR,LTBP1,MAP4K5,MAST4,MCAM,MECOM,MIA2,MUC5AC,NEFH,NFASC,PCM1,PDE4DIP,PRKACB,RASAL2,SLC22A18,SPTLC3,STAG2,TCF7L2,TG,TGFB2,THBS1,THSD7A,TM4SF1,TNC,UBE3B,UTRN,WNT5A,ZFR,ZFX,ZNF277,ZNF480,ZNF711 | 47 |
| Cell-To-Cell Signaling and Interaction,Cellular Movement,Hematological System Development and Function,Immune Cell Trafficking,Inflammatory Response                              | recruitment of macrophages            | 0.000226 |  | -0.808 | ANGPT2,CXCL12,FLT1,S100A4,THBS1,VDR                                                                                                                                                                                                                                                             | 6  |
| Cellular Development,Cellular Growth and Proliferation,Digestive System Development and Function,Hepatic System Development and Function,Organ Development                        | proliferation of liver cells          | 0.000226 |  | -0.737 | CEACAM1,CXCL12,CXCR4,EDNRA,FLT1,LEPR,PROX1,THBS1                                                                                                                                                                                                                                                | 8  |
| Cellular Movement                                                                                                                                                                 | release of blood cells                | 0.000232 |  |        | CXCL12,CXCR4,TFRC                                                                                                                                                                                                                                                                               | 3  |
| Organismal Injury and Abnormalities                                                                                                                                               | Hypertrophy                           | 0.000238 |  |        | ANGPT2,CREB1,CXCL12,EDNRA,EMP1,FHL1,FLT1,LEPR,MBNL1,MBNL2,RAPGEF3,TG,VDR,WNT5A                                                                                                                                                                                                                  | 14 |
| Cell Morphology                                                                                                                                                                   | abnormal morphology of cells          | 0.000238 |  |        | CLIC4,CXCR4,DPT,FHL5,FLT1,MBNL1,MBNL2,MECOM,MUC5AC,NCOA2,NEFH,NFASC,PGGT1B,PTGER2,RAPGEF3,RETREG1,SLC26A4,SMAD5,STK4,TCF7L2,TFRC,TGFB2,THBS1,USH1C,UTRN,VDR,VLDLR,WNT5A                                                                                                                         | 28 |
| Cell-To-Cell Signaling and Interaction,Cellular Movement,Hematological System Development and Function,Immune Cell Trafficking                                                    | recruitment of leukocytes             | 0.000252 |  | -0.191 | ADAM10,ANGPT2,C4A/C4B,CXCL12,CXCR4,EDIL3,FLT1,S100A4,THBS1,TNC,VDR                                                                                                                                                                                                                              | 11 |
| Cardiovascular System Development and Function,Cell Morphology,Cellular Development,Organismal Development,Tissue Development                                                     | tubulation of endothelial cell lines  | 0.000257 |  | -1.103 | CLIC4,CXCL12,CXCR4,PATJ                                                                                                                                                                                                                                                                         | 4  |
| Cancer,Organismal Injury and Abnormalities                                                                                                                                        | neoplasia of tumor cells              | 0.000258 |  | -1.067 | CEACAM1,CREB1,CXCR4,MCAM,TM4SF1,WNT5A                                                                                                                                                                                                                                                           | 6  |
| Embryonic Development,Nervous System Development and Function,Organ Development,Organ Morphology,Organismal Development,Tissue Development,Visual System Development and Function | morphology of cornea                  | 0.000267 |  |        | DPT,JAG1,MUC5AC,TGFB2,THBS1                                                                                                                                                                                                                                                                     | 5  |
| Cellular Movement                                                                                                                                                                 | cell movement of stem cells           | 0.000267 |  | -1.636 | ANGPT2,CXCL12,CXCR4,FLT1,S100A4                                                                                                                                                                                                                                                                 | 5  |
| Developmental Disorder,Embryonic Development,Organismal Development,Tissue Morphology                                                                                             | abnormal morphology of branchial arch | 0.000267 |  |        | ADAM10,EDNRA,LTBP1,MECOM,SMAD5                                                                                                                                                                                                                                                                  | 5  |
| Cellular Assembly and Organization                                                                                                                                                | development of cytoplasm              | 0.00027  |  | 0      | CREB1,CXCL12,EDNRA,ITGB1BP1,JAG1,MAG1,NEFH,RAB23,RAPGEF3,STK4,THBS1,TNC,TPM4,UTRN                                                                                                                                                                                                               | 14 |

Table G: Gene Functions Data Shown in Figure 6

|                                                                                                                                   |                                                        |          |  |        |                                                                                                                                                |    |
|-----------------------------------------------------------------------------------------------------------------------------------|--------------------------------------------------------|----------|--|--------|------------------------------------------------------------------------------------------------------------------------------------------------|----|
| Cardiovascular Disease, Organismal Injury and Abnormalities                                                                       | intermediate disease stage peripheral arterial disease | 0.000274 |  |        | CXCL12, CXCR4, DNAJB4, MBNL2, PDE4DIP, TGFB2, THBS1                                                                                            | 7  |
| Gastrointestinal Disease, Hepatic System Disease, Organismal Injury and Abnormalities                                             | formation of gallstone                                 | 0.000277 |  |        | CPE, LEPR, MUC5AC                                                                                                                              | 3  |
| Protein Synthesis                                                                                                                 | expression of reporter protein                         | 0.000277 |  |        | CREB1, NCOA2, VDR                                                                                                                              | 3  |
| Endocrine System Disorders, Gastrointestinal Disease, Metabolic Disease, Organismal Injury and Abnormalities                      | non-insulin-dependent diabetes mellitus                | 0.000279 |  |        | ADAMTS9, CALCR, CXCL12, EDNRA, FLT1, HNF1B, LEPR, PROX1, TAF13, TCF7L2, TNC, TSPAN5, VDR                                                       | 13 |
| Cardiovascular System Development and Function, Cell Morphology, Cellular Development, Organismal Development, Tissue Development | branching of endothelial cells                         | 0.000284 |  | -1.284 | ANGPT2, ITGB1BP1, PROX1, SRPX2, TNC                                                                                                            | 5  |
| Cell-mediated Immune Response, Cellular Movement, Hematological System Development and Function, Immune Cell Trafficking          | cell movement of T lymphocytes                         | 0.000291 |  | -1.573 | ADAM10, CXCL12, CXCR4, EFS, HNRNPL, MCAM, S100A4, THBS1, WNT5A                                                                                 | 9  |
| Cell-To-Cell Signaling and Interaction                                                                                            | activation of connective tissue cells                  | 0.000293 |  | -0.324 | CXCL12, CXCR4, DLK1, LEPR, TANK, TGFB2, WNT5A                                                                                                  | 7  |
| Developmental Disorder, Tissue Morphology                                                                                         | abnormal morphology of extraembryonic tissue           | 0.000295 |  |        | ADAM10, ADAMTS9, HNF1B, JAG1, MECOM, SMAD5, STK4, ZFX                                                                                          | 8  |
| Cellular Movement, Immune Cell Trafficking                                                                                        | leukocyte migration                                    | 0.000301 |  | -1.401 | ADAM10, ANGPT2, C4A/C4B, CEACAM1, CXCL12, CXCR4, EDIL3, EDNRA, EFS, FLT1, HNRNPL, MCAM, PROX1, S100A4, STK4, TG, TGFB2, THBS1, TNC, VDR, WNT5A | 21 |
| Organismal Injury and Abnormalities                                                                                               | Bleeding                                               | 0.000303 |  | 0.072  | ANGPT2, C4A/C4B, CXCR4, EDNRA, ENTPD1, FLT1, JAG1, MECOM, PROZ, PTGER2, SMAD5, THBS1, VDR                                                      | 13 |
| Cellular Movement                                                                                                                 | cell movement of leukemia cell lines                   | 0.000304 |  | -1.054 | ADAM10, CXCL12, CXCR4, FLT1, IQGAP1, TNC, WNT5A                                                                                                | 7  |
| Organismal Injury and Abnormalities, Reproductive System Disease                                                                  | disease of placenta                                    | 0.000304 |  |        | CALCRL, DLK1, FLT1, GRB10, MECOM, NCOA2, STK4                                                                                                  | 7  |
| Cardiovascular System Development and Function, Cell-To-Cell Signaling and Interaction                                            | adhesion of endothelial progenitor cells               | 0.000307 |  |        | CXCL12, MCAM                                                                                                                                   | 2  |

Table G: Gene Functions Data Shown in Figure 6

|                                                                                                                                                          |                                                 |          |        |  |                                                                                                                                                                                                                                                                                                                              |    |
|----------------------------------------------------------------------------------------------------------------------------------------------------------|-------------------------------------------------|----------|--------|--|------------------------------------------------------------------------------------------------------------------------------------------------------------------------------------------------------------------------------------------------------------------------------------------------------------------------------|----|
| Cell-mediated Immune Response, Cellular Movement, Hematological System Development and Function, Hematopoiesis, Immune Cell Trafficking                  | emigration of thymocytes                        | 0.000307 |        |  | CXCL12, CXCR4                                                                                                                                                                                                                                                                                                                | 2  |
| Amino Acid Metabolism, Molecular Transport, Small Molecule Biochemistry                                                                                  | transport of L-histidine                        | 0.000307 |        |  | SLC38A2, SLC38A3                                                                                                                                                                                                                                                                                                             | 2  |
| Auditory and Vestibular System Development and Function, Auditory Disease, Organ Morphology, Organismal Development, Organismal Injury and Abnormalities | abnormal morphology of spiral limbus            | 0.000307 |        |  | SLC26A4, TGFB2                                                                                                                                                                                                                                                                                                               | 2  |
| Cellular Movement, Hematological System Development and Function                                                                                         | redistribution of megakaryocytes                | 0.000307 |        |  | CXCR4, FLT1                                                                                                                                                                                                                                                                                                                  | 2  |
| Embryonic Development, Organismal Development, Tissue Development                                                                                        | formation of rostral migratory stream           | 0.000307 |        |  | CXCR4, VLDLR                                                                                                                                                                                                                                                                                                                 | 2  |
| Cell Morphology, Hematological System Development and Function                                                                                           | polarization of B-lymphocyte derived cell lines | 0.000307 |        |  | CXCL12, STK4                                                                                                                                                                                                                                                                                                                 | 2  |
| Cellular Development, Cellular Growth and Proliferation, Nervous System Development and Function, Tissue Development                                     | growth of thalamocortical axons                 | 0.000307 |        |  | CXCL12, CXCR4                                                                                                                                                                                                                                                                                                                | 2  |
| Cellular Assembly and Organization, Cellular Function and Maintenance                                                                                    | microtubule dynamics                            | 0.000308 | -1.727 |  | ADAM10, ANGPT2, ATRX, CALU, CREB1, CXCL12, CXCR4, EDNRA, FLT1, IQGAP1, NANOG, NEFH, PCM1, PDE4DIP, PRKACB, RAB23, RAPGEF3, S100A4, SEMA6A, SMAD5, SYT1, THBS1, TM4SF1, TNC, VLDLR, WNT5A                                                                                                                                     | 26 |
| Cell-To-Cell Signaling and Interaction                                                                                                                   | binding of bone cancer cell lines               | 0.000327 |        |  | CALCRL, CXCL12, TNC                                                                                                                                                                                                                                                                                                          | 3  |
| Cell-mediated Immune Response, Cellular Movement, Hematological System Development and Function, Hematopoiesis, Immune Cell Trafficking                  | migration of thymocytes                         | 0.000327 |        |  | CXCL12, CXCR4, HNRNPL                                                                                                                                                                                                                                                                                                        | 3  |
| Endocrine System Disorders, Gastrointestinal Disease, Organismal Injury and Abnormalities                                                                | pancreatic mass                                 | 0.000331 |        |  | ABCC9, ABO, ADAM10, ATRX, CES2, CXCL12, CXCR4, CYP4F2, ENOSF1, FERMT1, FHL1, FLT1, GRB10, HNRNPL, IQGAP1, ITGB1BP1, LEPR, LTBP1, MAST4, MCAM, MECOM, MIA2, MUC5AC, NEFH, NFASC, PCM1, PDE4DIP, PRKACB, RASAL2, SLC22A18, SPTLC3, STAG2, TCF7L2, TG, TGFB2, THBS1, THSD7A, TNC, UTRN, WNT5A, ZFR, ZFX, ZNF277, ZNF480, ZNF711 | 45 |
| Developmental Disorder                                                                                                                                   | hypoplasia of organ                             | 0.000334 | 1.689  |  | ATRX, CALCRL, DLK1, EDNRA, HNF1B, ITGB1BP1, MECOM, NCOA2, SSBP2, TGFB2, THBS1, VDR, VLDLR                                                                                                                                                                                                                                    | 13 |

Table G: Gene Functions Data Shown in Figure 6

|                                                                                                                |                                          |          |  |        |                                                                                                                                                                                                                     |    |
|----------------------------------------------------------------------------------------------------------------|------------------------------------------|----------|--|--------|---------------------------------------------------------------------------------------------------------------------------------------------------------------------------------------------------------------------|----|
| Cancer,Organismal Injury and Abnormalities                                                                     | neoplasia of carcinoma cell lines        | 0.000337 |  | -0.714 | ADAMTS9,CEACAM1,CXCR4,DNAJB4,S100A4                                                                                                                                                                                 | 5  |
| Cancer,Organismal Injury and Abnormalities                                                                     | cancer of exocrine gland                 | 0.000337 |  |        | ADAM10,PRKACB,SSBP2,TLK1,TNC                                                                                                                                                                                        | 5  |
| Cellular Development,Cellular Growth and Proliferation,Hair and Skin Development and Function                  | proliferation of epithelial cell lines   | 0.000354 |  | 0.923  | CALCR,CREB1,ID4,NANOG,NCOA2,PTGER2,TFRC,TGFB2,WNT5A                                                                                                                                                                 | 9  |
| Cancer,Endocrine System Disorders                                                                              | hyperplasia of endocrine gland           | 0.000356 |  | -0.555 | RAPGEF3,TCF7L2,TG,THBS1,VDR                                                                                                                                                                                         | 5  |
| Cardiovascular Disease                                                                                         | Hypertension                             | 0.000359 |  | -0.391 | ABCC9,ANGPT2,CHN2,CXCR4,EDNRA,FERMT1,FHL1,FHL5,FLT1,LEPR,MECOM,MSMO1,TAF13,TMX1,TNC,VDR,VLDLR                                                                                                                       | 17 |
| Cancer,Gastrointestinal Disease,Organismal Injury and Abnormalities                                            | gastric carcinoma                        | 0.000363 |  |        | ABCC9,ADAM10,ADAMTS9,ANGPT2,CES2,CYP4F2,FILIP1L,HNRNPL,KCNMA1,MAST4,MBNL2,MUC5AC,NCOA2,NFASC,PDE4DIP,SEMA4G,SLC13A2,SPTLC3,SSBP2,TG,THBS1,THSD7A,TNC,UBE3B,UTRN,VLDLR,ZNF480                                        | 27 |
| Cellular Movement                                                                                              | cell movement of mammary tumor cells     | 0.000364 |  | -1.934 | CXCL12,CXCR4,MCAM,WNT5A                                                                                                                                                                                             | 4  |
| Cancer,Gastrointestinal Disease,Organismal Injury and Abnormalities                                            | gastroesophageal cancer                  | 0.00037  |  |        | ABCC9,ADAM10,ADAMTS9,ANGPT2,CES2,CPE,CXCL12,CYP4F2,FILIP1L,FLT1,HNRNPL,KCNMA1,MAST4,MBNL2,MUC5AC,NCOA2,NEFH,NFASC,OVGP1,PDE4DIP,SEMA4G,SLC13A2,SPTLC3,SSBP2,TG,THBS1,THSD7A,TNC,TPCN1,UBE3B,UTRN,VLDLR,WNT5A,ZNF480 | 34 |
| Cellular Assembly and Organization,Cellular Function and Maintenance,Tissue Development                        | formation of actin stress fibers         | 0.000371 |  | 0.308  | CREB1,CXCL12,EDNRA,ITGB1BP1,JAG1,MAG1,RAPGEF3,TNC,TPM4                                                                                                                                                              | 9  |
| Cell Signaling                                                                                                 | activation of enzyme                     | 0.000373 |  |        | CEACAM1,CXCR4,EDNRA,IQGAP1,ITGB1BP1,MAP4K5,MDFIC,PDCD6,THBS1,VLDLR,WNT5A                                                                                                                                            | 11 |
| Hematological System Development and Function,Tissue Morphology                                                | quantity of blood cells                  | 0.000377 |  | -1.54  | ADAM10,C4A/C4B,CALCRL,CLIC4,CREB1,CXCL12,CXCR4,DLK1,ELF1,FLT1,LEPR,MECOM,PLCL2,PTGER2,SMAD5,SSBP2,STK4,TANK,TFRC,TG,THBS1,VDR,ZFX                                                                                   | 23 |
| Cellular Movement                                                                                              | invasion of lung cancer cell lines       | 0.000379 |  | -0.647 | ADAM10,CXCL12,CXCR4,DNAJB4,S100A4,TGFB2                                                                                                                                                                             | 6  |
| Cell Morphology,Cellular Development                                                                           | branching of cells                       | 0.000379 |  | -1.562 | ADAM10,ANGPT2,ATRX,CREB1,CXCL12,ITGB1BP1,NEFH,PROX1,SEMA6A,SRPX2,TNC,WNT5A                                                                                                                                          | 12 |
| Cell-To-Cell Signaling and Interaction,Hematological System Development and Function                           | binding of mononuclear leukocytes        | 0.000381 |  | -1.558 | ANGPT2,CXCL12,CXCR4,MCAM,STK4,TFRC,THBS1,TNC                                                                                                                                                                        | 8  |
| Cardiovascular System Development and Function,Embryonic Development,Organismal Development,Tissue Development | vascularization of extraembryonic tissue | 0.000383 |  |        | CEACAM1,SMAD5,STK4                                                                                                                                                                                                  | 3  |

Table G: Gene Functions Data Shown in Figure 6

|                                                                                                                                                   |                                         |          |  |        |                                                                                                                                                                                                                                                                                                                                                                                                                                                            |    |
|---------------------------------------------------------------------------------------------------------------------------------------------------|-----------------------------------------|----------|--|--------|------------------------------------------------------------------------------------------------------------------------------------------------------------------------------------------------------------------------------------------------------------------------------------------------------------------------------------------------------------------------------------------------------------------------------------------------------------|----|
| Cellular Development                                                                                                                              | differentiation of vasculature          | 0.000383 |  |        | CXCL12,CXCR4,JAG1                                                                                                                                                                                                                                                                                                                                                                                                                                          | 3  |
| Cardiovascular System Development and Function,Organismal Development                                                                             | remodeling of vasculature               | 0.000383 |  |        | CXCL12,CXCR4,FLT1                                                                                                                                                                                                                                                                                                                                                                                                                                          | 3  |
| Cancer,Organismal Injury and Abnormalities,Reproductive System Disease                                                                            | breast or ovarian cancer                | 0.000392 |  |        | ABCC9,ABO,ADAM10,ADAMTS9,ANGPT2,ATRX,C4A/C4B,CES2,CLIC4,CPE,CXCL12,CXCR4,ENPEP,FAM198B,FLT1,JAG1,LEPR,LYVE1,MAG1,MAST4,MCAM,MECOM,MUC5AC,NCOA2,OVGP1,PDCC6,PROX1,PTGER2,S100A4,SENP7,SLC22A18,SLC39A4,STAG2,TCF7L2,TES,TG,TGFB2,THBS1,TM4SF1,TNC,TPM4,TUBAL3,UTRN,VDR,VLDLR,VPS13D,WNT5A                                                                                                                                                                   | 47 |
| Cardiovascular System Development and Function,Cellular Movement                                                                                  | cell movement of endothelial cell lines | 0.000395 |  | -0.447 | ANGPT2,FLT1,LYVE1,PATJ,THBS1,TNC                                                                                                                                                                                                                                                                                                                                                                                                                           | 6  |
| Cell-To-Cell Signaling and Interaction                                                                                                            | activation of cells                     | 0.000398 |  | -0.669 | ADAM10,ANGPT2,C4A/C4B,CEACAM1,CPE,CXCL12,CXCR4,DLK1,ENPEP,ENTPD1,IQGAP1,KCNMA1,LEPR,LTBP1,PTGER2,RAPGEF3,TANK,TG,TGFB2,THBS1,TNC,WNT5A                                                                                                                                                                                                                                                                                                                     | 22 |
| Cardiovascular Disease,Cardiovascular System Development and Function,Organ Morphology,Organismal Development,Organismal Injury and Abnormalities | hypertrophy of heart                    | 0.000402 |  |        | ANGPT2,CREB1,CXCL12,EDNRA,FLT1,LEPR,MBNL1,MBNL2,RAPGEF3,TG,VDR                                                                                                                                                                                                                                                                                                                                                                                             | 11 |
| Cancer,Gastrointestinal Disease,Organismal Injury and Abnormalities                                                                               | gastrointestinal adenocarcinoma         | 0.000405 |  |        | ABCC9,ADAMTS9,ALDH6A1,ALLC,ANGPT2,ATRX,CALCR,CES2,CPE,CYP4F2,EDIL3,ELF1,ENPEP,FAM216A,FHL1,FILIP1L,FLT1,HNRNPL,JAG1,KCNMA1,KIF13A,LEPR,LTBP1,MAG1,MAP4K5,MAST4,MBNL1,MBNL2,MECOM,MIA2,MLXIPL,MUC5AC,NCOA2,NEFH,NFASC,NR1D2,OVGP1,PCM1,PDE4DIP,PGGT1B,PRKACB,RAPGEF3,RASAL2,RIOK3,SEMA4G,SEMA6A,SENP7,SLC13A2,SLC38A2,SLC39A4,SPTLC3,SSBP2,SYT1,TCF7L2,TES,TFRC,TG,THBS1,THSD7A,TLK1,TNC,TPCN1,TUBAL3,UBE3B,UTRN,VDR,VPS13D,WNT5A,ZFR,ZFX,ZFY,ZNF480,ZNF711 | 73 |
| Cancer,Gastrointestinal Disease,Organismal Injury and Abnormalities                                                                               | gastroesophageal carcinoma              | 0.000416 |  |        | ABCC9,ADAM10,ADAMTS9,ANGPT2,CES2,CPE,CYP4F2,FILIP1L,FLT1,HNRNPL,KCNMA1,MAST4,MBNL2,MUC5AC,NCOA2,NEFH,NFASC,OVGP1,PDE4DIP,SEMA4G,SLC13A2,SPTLC3,SSBP2,TG,THBS1,THSD7A,TNC,TPCN1,UBE3B,UTRN,VLDLR,ZNF480                                                                                                                                                                                                                                                     | 32 |
| Cardiovascular System Development and Function,Tissue Morphology                                                                                  | permeability of vasculature             | 0.000428 |  | -0.328 | ANGPT2,C4A/C4B,CREB1,CXCL12,FLT1,THBS1                                                                                                                                                                                                                                                                                                                                                                                                                     | 6  |
| Cancer,Organismal Injury and Abnormalities                                                                                                        | low grade acinar-cell carcinoma         | 0.000444 |  |        | PRKACB,TLK1,TNC                                                                                                                                                                                                                                                                                                                                                                                                                                            | 3  |
| Cellular Movement                                                                                                                                 | migration of neuroblastoma cell lines   | 0.000444 |  |        | ANGPT2,CXCL12,CXCR4                                                                                                                                                                                                                                                                                                                                                                                                                                        | 3  |
| Organ Morphology,Reproductive System Development and Function                                                                                     | morphology of genital organ             | 0.000456 |  |        | ATRX,FHL5,FLT1,MLXIPL,NCOA2,NUPR1,PTGER2,RAPGEF3,SMAD5,TGFB2,THBS1,VDR,VLDLR,WNT5A                                                                                                                                                                                                                                                                                                                                                                         | 14 |
| Cell Death and Survival                                                                                                                           | apoptosis of breast cancer cell lines   | 0.000456 |  | 0.101  | ANGPT2,CEACAM1,GPX2,NANOG,PDCC4,SPAG5,TFRC,TGFB2,THBS1,VDR                                                                                                                                                                                                                                                                                                                                                                                                 | 10 |

Table G: Gene Functions Data Shown in Figure 6

|                                                                                                                                 |                                  |          |  |        |                                                                                                                                                                                                                                                                                                                                                                                                                                                                                                                                                                                                                                                                                                                                                                                   |     |
|---------------------------------------------------------------------------------------------------------------------------------|----------------------------------|----------|--|--------|-----------------------------------------------------------------------------------------------------------------------------------------------------------------------------------------------------------------------------------------------------------------------------------------------------------------------------------------------------------------------------------------------------------------------------------------------------------------------------------------------------------------------------------------------------------------------------------------------------------------------------------------------------------------------------------------------------------------------------------------------------------------------------------|-----|
| Cell Death and Survival, Organismal Injury and Abnormalities                                                                    | cell death of endothelial cells  | 0.00046  |  | -0.063 | ANGPT2, CXCL12, CXCR4, EDIL3, FLT1, MCAM, SEMA6A, THBS1                                                                                                                                                                                                                                                                                                                                                                                                                                                                                                                                                                                                                                                                                                                           | 8   |
| Cardiovascular System Development and Function, Organismal Development                                                          | development of aorta             | 0.000462 |  |        | CXCR4, FLT1, LTBP1, TGFB2                                                                                                                                                                                                                                                                                                                                                                                                                                                                                                                                                                                                                                                                                                                                                         | 4   |
| Cancer, Gastrointestinal Disease, Hepatic System Disease, Organismal Injury and Abnormalities                                   | biliary tract adenocarcinoma     | 0.000465 |  |        | ATRX, CXCR4, FLT1, LEPR, MAP4K5, TCF7L2, TM4SF1                                                                                                                                                                                                                                                                                                                                                                                                                                                                                                                                                                                                                                                                                                                                   | 7   |
| Cell-To-Cell Signaling and Interaction, Cellular Growth and Proliferation                                                       | stimulation of cells             | 0.000466 |  | -1.373 | ANGPT2, CALCRL, CXCL12, HNF1B, PTGER2, S100A4, TG, TGFB2, THBS1, WNT5A                                                                                                                                                                                                                                                                                                                                                                                                                                                                                                                                                                                                                                                                                                            | 10  |
| Cellular Movement, Hematological System Development and Function, Immune Cell Trafficking, Inflammatory Response                | cell movement of phagocytes      | 0.000476 |  | -1.887 | ADAM10, ANGPT2, C4A/C4B, CEACAM1, CXCL12, CXCR4, EDIL3, EDNRA, FLT1, MCAM, S100A4, STK4, TGF B2, THBS1, WNT5A                                                                                                                                                                                                                                                                                                                                                                                                                                                                                                                                                                                                                                                                     | 15  |
| Organismal Injury and Abnormalities, Renal and Urological Disease                                                               | urination disorder               | 0.000485 |  | -0.6   | ANGPT2, FERMT1, FLT1, KCNMA1, LEPR, SLC13A2, SLC26A4, TGFB2, VDR, VLDLR                                                                                                                                                                                                                                                                                                                                                                                                                                                                                                                                                                                                                                                                                                           | 10  |
| Cellular Function and Maintenance, Cellular Movement, Hematological System Development and Function, Infectious Diseases        | release of neutrophils           | 0.000509 |  |        | CXCL12, CXCR4                                                                                                                                                                                                                                                                                                                                                                                                                                                                                                                                                                                                                                                                                                                                                                     | 2   |
| Cellular Movement, Embryonic Development                                                                                        | homing of mesenchymal stem cells | 0.000509 |  |        | CXCR4, S100A4                                                                                                                                                                                                                                                                                                                                                                                                                                                                                                                                                                                                                                                                                                                                                                     | 2   |
| Embryonic Development, Endocrine System Development and Function, Organ Development, Organismal Development, Tissue Development | formation of thyroid follicle    | 0.000509 |  |        | CREB1, THBS1                                                                                                                                                                                                                                                                                                                                                                                                                                                                                                                                                                                                                                                                                                                                                                      | 2   |
| Cancer, Gastrointestinal Disease, Organismal Injury and Abnormalities                                                           | gastrointestinal carcinoma       | 0.00051  |  |        | ABCC9, ADAM10, ADAMTS9, ALDH6A1, ALLC, ANGPT2, ATRX, CALCR, CALCRL, CALU, CDC40, CEACAM1, CES2, CPE, CREB1, CXCL12, CXCR4, CYP4F2, DLK1, DNAJB4, DPT, EDIL3, ELF1, ENOSF1, ENPEP, FAM216A, FERMT1, FHL1, FHL5, FILIP1L, FLT1, GGH, GRB10, HNRNPL, IQGAP1, JAG1, KCNMA1, KIF13A, LEPR, LHP P, LTBP1, MAGI1, MAP4K5, MAST4, MBNL1, MBNL2, MCAM, MECOM, MIA2, MLXIPL, MUC5AC, NCOA2, NEFH, NFASC, NR1D2, OVG P1, PAMR1, PCM1, PDE4DIP, PGGT1B, PLCL2, PRKACB, PROX1, RAPGEF3, RASAL2, RIOK3, SEMA4G, SEMA6A, SENP7, SLC13A2, SLC26A4, SLC38A2, SLC39A4, SLC02A1, SPAG5, SPTLC3, SRPX2, SSBP2, STAG2, SYT1, TAF13, TCF7L2, TES, TFRC, TG, TGFB2, THBS1, THSD7A, TLK1, TM4SF1, TMX1, TNC, TPCN1, TSPAN5, TUBAL3, UBE3B, UTRN, VDR, VLDLR, VPS13D, WNT5A, ZFR, ZFX, ZFY, ZNF480, ZNF711 | 106 |
| Cellular Growth and Proliferation                                                                                               | colony formation of cells        | 0.000511 |  | 0.107  | CEACAM1, CXCL12, FLT1, ID4, IQGAP1, MCAM, MECOM, NANOG, NUPR1, SMAD5, STK4, TCF7L2, TES, TGF B2                                                                                                                                                                                                                                                                                                                                                                                                                                                                                                                                                                                                                                                                                   | 14  |
| Cancer, Organismal Injury and Abnormalities                                                                                     | growth of secondary tumor        | 0.000511 |  |        | CXCR4, TGFB2, TNC                                                                                                                                                                                                                                                                                                                                                                                                                                                                                                                                                                                                                                                                                                                                                                 | 3   |

Table G: Gene Functions Data Shown in Figure 6

|                                                                                                                                |                                         |          |  |        |                                                                                                                                                      |    |
|--------------------------------------------------------------------------------------------------------------------------------|-----------------------------------------|----------|--|--------|------------------------------------------------------------------------------------------------------------------------------------------------------|----|
| Cardiovascular Disease, Cardiovascular System Development and Function, Organismal Injury and Abnormalities, Tissue Morphology | abnormal morphology of blood vessel     | 0.000526 |  |        | CALCRL, CXCL12, CXCR4, EDNRA, FLT1, LTBP1, SMAD5, STK4, TGFB2                                                                                        | 9  |
| Organismal Development, Reproductive System Development and Function                                                           | development of reproductive system      | 0.000545 |  |        | ATRX, CREB1, CXCL12, CXCR4, FHL5, HNF1B, HSF2, ID4, LEPR, NCOA2, NUPR1, PTGER2, SMAD5, STK4, TGFB2, VDR, WNT5A, ZFX                                  | 18 |
| Cell Morphology, Cellular Assembly and Organization, Cellular Function and Maintenance                                         | formation of cellular protrusions       | 0.000561 |  | -1.365 | ADAM10, ATRX, CALU, CREB1, CXCL12, CXCR4, EDNRA, IQGAP1, NANOG, NEFH, PCM1, PRKACB, RAB23, RAPGEF3, S100A4, SEMA6A, THBS1, TM4SF1, TNC, VLDLR, WNT5A | 21 |
| Hereditary Disorder, Organismal Injury and Abnormalities                                                                       | autosomal dominant disease              | 0.000568 |  |        | ABCC9, ADAM10, ADGRL3, ANGPT2, CPE, CXCR4, EDNRA, FHL1, FILIP1L, HNF1B, JAG1, MBNL1, MECOM, MLXIPL, NEFH, TGFB2, TNC, TPM4, VLDLR, WNT5A             | 20 |
| Skeletal and Muscular Disorders                                                                                                | damage of muscle                        | 0.000569 |  | 0.447  | ANGPT2, FHL1, MBNL1, MBNL2, PDCD4                                                                                                                    | 5  |
| Cell-To-Cell Signaling and Interaction, Hematological System Development and Function                                          | binding of lymphocytes                  | 0.000577 |  | -1.259 | CXCL12, CXCR4, MCAM, STK4, TFRC, THBS1, TNC                                                                                                          | 7  |
| Cell-To-Cell Signaling and Interaction, Connective Tissue Development and Function, Hepatic System Development and Function    | activation of hepatic stellate cells    | 0.000578 |  |        | CXCL12, DLK1, LEPR, WNT5A                                                                                                                            | 4  |
| Nutritional Disease                                                                                                            | obesity                                 | 0.00058  |  | 0.356  | ANGPT2, CEACAM1, CPE, CREB1, CXCR4, DLK1, ENTPD1, FLT1, LEPR, NCOA2, PLCL2, PROX1, RAPGEF3, VDR                                                      | 14 |
| Cellular Development, Nervous System Development and Function, Tissue Development                                              | differentiation of hair cells           | 0.000585 |  |        | JAG1, KCNMA1, USH1C                                                                                                                                  | 3  |
| Cellular Movement                                                                                                              | migration of neuronal progenitor cells  | 0.000585 |  |        | ANGPT2, CXCL12, CXCR4                                                                                                                                | 3  |
| Skeletal and Muscular System Development and Function                                                                          | morphology of muscle                    | 0.000588 |  |        | ANGPT2, CALCRL, CXCL12, CXCR4, EDNRA, FHL1, GRB10, LTBP1, MBNL1, RAPGEF3, TGFB2, THBS1, UTRN, VDR                                                    | 14 |
| Organismal Injury and Abnormalities                                                                                            | Fibrosis                                | 0.000589 |  | 0.092  | ANGPT2, CREB1, CXCL12, DLK1, EDNRA, ENTPD1, FLT1, MBNL1, MBNL2, S100A4, STK4, TGFB2, THBS1, TM4SF1, VDR                                              | 15 |
| Cardiovascular System Development and Function                                                                                 | neovascularization                      | 0.000595 |  | -0.058 | CLIC4, CXCL12, CXCR4, FLT1, S100A4, THBS1, VLDLR                                                                                                     | 7  |
| Digestive System Development and Function, Gastrointestinal Disease                                                            | abnormal morphology of digestive system | 0.000596 |  |        | C4A/C4B, CEACAM1, DLK1, EDNRA, FERMT1, IQGAP1, JAG1, MUC5AC, RAPGEF3, TCF7L2, TGFB2, THBS1, USH1C, VDR, WNT5A                                        | 15 |
| Gastrointestinal Disease, Hepatic System Disease, Organismal Injury and Abnormalities                                          | cholelithiasis                          | 0.00062  |  |        | CPE, LEPR, MUC5AC, TNC                                                                                                                               | 4  |
| Cancer, Organismal Injury and Abnormalities, Tumor Morphology                                                                  | progression of tumor                    | 0.000628 |  | -0.563 | CXCL12, CXCR4, FLT1, MCAM, PDCD4, S100A4, THBS1, TNC, WNT5A                                                                                          | 9  |



Table G: Gene Functions Data Shown in Figure 6

|                                                                                                        |                                         |          |        |  |                                                                                                                                                                                                                                                                                                                                                                                                                   |    |
|--------------------------------------------------------------------------------------------------------|-----------------------------------------|----------|--------|--|-------------------------------------------------------------------------------------------------------------------------------------------------------------------------------------------------------------------------------------------------------------------------------------------------------------------------------------------------------------------------------------------------------------------|----|
| Cancer,Endocrine System Disorders,Gastrointestinal Disease,Organismal Injury and Abnormalities         | pancreatic tumor                        | 0.000634 |        |  | ABCC9,ABO,ADAM10,ATRX,CXCL12,CXCR4,CYP4F2,ENOSF1,FERMT1,FHL1,FLT1,GRB10,HNRNPL,IQGAP1,ITGB1BP1,LEPR,LTBP1,MAST4,MCAM,MECOM,MIA2,MUC5AC,NEFH,NFASC,PCM1,PDE4DIP,PRKACB,RASAL2,SLC22A18,SPTLC3,STAG2,TCF7L2,TG,TGFB2,THBS1,THSD7A,TNC,UTRN,WNT5A,ZFR,ZFX,ZNF277,ZNF480,ZNF711                                                                                                                                       | 44 |
| Cancer,Organismal Injury and Abnormalities                                                             | connective tissue tumor                 | 0.000635 | 1.121  |  | ANGPT2,ATRX,CALCR,CREB1,CXCL12,FERMT1,FLT1,LEPR,MUC5AC,NCOA2,OVGP1,PDE4DIP,S100A4,SLC22A18,SLC39A4,SSBP2,STAG2,TG,THBS1,VDR                                                                                                                                                                                                                                                                                       | 20 |
| Cellular Assembly and Organization,Cellular Function and Maintenance,Tissue Development                | formation of actin filaments            | 0.000665 | -0.095 |  | CREB1,CXCL12,EDNRA,ITGB1BP1,JAG1,MAG1,RAPGEF3,STK4,TNC,TPM4                                                                                                                                                                                                                                                                                                                                                       | 10 |
| Organismal Development,Organismal Injury and Abnormalities                                             | abnormal morphology of thoracic cavity  | 0.00067  |        |  | ADAM10,ADAMTS9,CALCRL,CREB1,CXCR4,EDNRA,JAG1,LTBP1,MBNL1,MBNL2,MECOM,SLCO2A1,TGFB2,THBS1,WNT5A                                                                                                                                                                                                                                                                                                                    | 15 |
| Cancer,Gastrointestinal Disease,Organismal Injury and Abnormalities                                    | secondary neoplasm of digestive system  | 0.000678 |        |  | CXCL12,CXCR4,EFS,EMP1,FLT1,JAG1,S100A4,TGFB2,THBS1,TM4SF1                                                                                                                                                                                                                                                                                                                                                         | 10 |
| Cancer,Gastrointestinal Disease,Organismal Injury and Abnormalities                                    | colorectal carcinoma                    | 0.000682 |        |  | ADAMTS9,ALDH6A1,ALLC,ANGPT2,ATRX,CALCR,CEACAM1,CES2,CYP4F2,EDIL3,ELF1,ENPEP,FAM216A,FERMT1,FHL1,FLT1,HNRNPL,JAG1,KCNMA1,KIF13A,LEPR,LTBP1,MAG1,MAP4K5,MAST4,MBNL1,MECOM,MIA2,MLXIPL,MUC5AC,NCOA2,NEFH,NFASC,NR1D2,OVGP1,PCM1,PDE4DIP,PGGT1B,RAPGEF3,RASAL2,RIOK3,SEMA4G,SEMA6A,SENP7,SLC13A2,SLC38A2,SLC39A4,SSBP2,STAG2,SYT1,TCF7L2,TES,TFRC,TG,THBS1,TNC,TUBAL3,UTRN,VDR,VPS13D,WNT5A,ZFR,ZFX,ZFY,ZNF480,ZNF711 | 66 |
| Cellular Development,Nervous System Development and Function,Tissue Development                        | differentiation of neurons              | 0.000699 | -1.342 |  | CREB1,CXCL12,ID4,JAG1,KCNMA1,NEFH,PROX1,S100A4,TGFB2,TNC,USH1C,WNT5A                                                                                                                                                                                                                                                                                                                                              | 12 |
| Nervous System Development and Function,Tissue Morphology                                              | quantity of neurons                     | 0.00071  | -1.73  |  | ADAM10,CREB1,CXCL12,CXCR4,HSF2,JAG1,NEFH,NFASC,PTGER2,TGFB2,UTRN,WNT5A                                                                                                                                                                                                                                                                                                                                            | 12 |
| Organ Morphology,Organismal Development,Reproductive System Development and Function,Tissue Morphology | quantity of sperm                       | 0.000712 | -1     |  | ENTPD1,FHL5,VDR,ZFX                                                                                                                                                                                                                                                                                                                                                                                               | 4  |
| Cancer,Organismal Injury and Abnormalities                                                             | neoplasia of cancer cells               | 0.000712 |        |  | CEACAM1,CXCR4,MCAM,WNT5A                                                                                                                                                                                                                                                                                                                                                                                          | 4  |
| Cellular Function and Maintenance                                                                      | function of blood cells                 | 0.000713 |        |  | CEACAM1,CREB1,CXCL12,EFS,ENTPD1,FLT1,MECOM,PTGER2,S100A4,STK4,TANK,TGFB2,TPCN1,VDR                                                                                                                                                                                                                                                                                                                                | 14 |
| Cellular Movement                                                                                      | cell movement of lung cancer cell lines | 0.000723 | -0.239 |  | ADAM10,CXCL12,DNAJB4,S100A4,TCF7L2,TGFB2                                                                                                                                                                                                                                                                                                                                                                          | 6  |
| Organismal Injury and Abnormalities,Renal and Urological Disease                                       | proteinuria                             | 0.000731 | -0.277 |  | ANGPT2,FERMT1,FLT1,LEPR,TGFB2,VDR,VLDLR                                                                                                                                                                                                                                                                                                                                                                           | 7  |
| Cancer,Organismal Injury and Abnormalities,Reproductive System Disease                                 | uterine serous papillary cancer         | 0.000745 |        |  | CXCL12,DPT,EDNRA,ENPEP,ENTPD1,FGL2,FILIP1L,KCNMA1                                                                                                                                                                                                                                                                                                                                                                 | 8  |

Table G: Gene Functions Data Shown in Figure 6

|                                                                                                                                                       |                                                     |          |  |        |                                                                                                                                                                                    |    |
|-------------------------------------------------------------------------------------------------------------------------------------------------------|-----------------------------------------------------|----------|--|--------|------------------------------------------------------------------------------------------------------------------------------------------------------------------------------------|----|
| Organismal Injury and Abnormalities, Renal and Urological Disease                                                                                     | renal lesion                                        | 0.000746 |  |        | ADAMTS9, ATRX, CALCRL, CES2, CYP4F3, ENPEP, ENTPD1, FLT1, HNF1B, KCNMA1, MAGI1, MAST4, MECOM, MLXIPL, MUC5AC, PDE4DIP, PROX1, SLC26A4, STAG2, SULT1C2, THBS1, THSD7A, TSPAN5, UTRN | 24 |
| Cellular Movement                                                                                                                                     | migration of glioma cells                           | 0.000752 |  |        | CXCL12, TGFB2, THBS1                                                                                                                                                               | 3  |
| Cardiovascular Disease, Cardiovascular System Development and Function, Organ Morphology, Organismal Development, Organismal Injury and Abnormalities | abnormal morphology of dilated atrium               | 0.000752 |  |        | EDNRA, MBNL1, MBNL2                                                                                                                                                                | 3  |
| Organ Morphology, Reproductive System Development and Function                                                                                        | quantity of ovarian follicle                        | 0.000756 |  | -1.732 | FLT1, HSF2, LEPR, PTGER2, ZFX                                                                                                                                                      | 5  |
| Cellular Movement                                                                                                                                     | release of hematopoietic progenitor cells           | 0.00076  |  |        | CXCL12, CXCR4                                                                                                                                                                      | 2  |
| Nervous System Development and Function, Neurological Disease, Organ Morphology, Organismal Development, Organismal Injury and Abnormalities          | abnormal morphology of external granule cell layer  | 0.00076  |  |        | CXCL12, CXCR4                                                                                                                                                                      | 2  |
| Cancer, Dermatological Diseases and Conditions, Organismal Injury and Abnormalities                                                                   | neoplasia of melanoma cells                         | 0.00076  |  |        | MCAM, WNT5A                                                                                                                                                                        | 2  |
| Amino Acid Metabolism, Molecular Transport, Small Molecule Biochemistry                                                                               | efflux of glutamine family amino acid               | 0.00076  |  |        | SLC38A2, SLC38A3                                                                                                                                                                   | 2  |
| Cellular Movement, Hematological System Development and Function, Hematopoiesis, Immune Cell Trafficking, Inflammatory Response                       | migration of plasmacytoid precursor dendritic cells | 0.00076  |  |        | CXCL12, CXCR4                                                                                                                                                                      | 2  |
| Amino Acid Metabolism, Molecular Transport, Small Molecule Biochemistry                                                                               | transport of L-alanine                              | 0.00076  |  |        | SLC38A2, SLC38A3                                                                                                                                                                   | 2  |
| Cellular Movement                                                                                                                                     | release of blood platelets                          | 0.00076  |  |        | CXCL12, TFRC                                                                                                                                                                       | 2  |
| Developmental Disorder, Ophthalmic Disease, Organismal Injury and Abnormalities                                                                       | blepharophthalmosis                                 | 0.00076  |  |        | DLK1, UBE3B                                                                                                                                                                        | 2  |
| Lipid Metabolism, Small Molecule Biochemistry                                                                                                         | fatty acid metabolism                               | 0.00076  |  | 0.066  | CEACAM1, CXCL12, CYP4F2, CYP4F3, EDNRA, ENTPD1, LEPR, ME2, MLXIPL, MSMO1, PTGER2, SLC38A2, SLC2A1, VLDLR, WNT5A                                                                    | 15 |

Table G: Gene Functions Data Shown in Figure 6

|                                                                                                                                                                                                                                     |                                                |          |  |        |                                                                                                                                                                                                        |    |
|-------------------------------------------------------------------------------------------------------------------------------------------------------------------------------------------------------------------------------------|------------------------------------------------|----------|--|--------|--------------------------------------------------------------------------------------------------------------------------------------------------------------------------------------------------------|----|
| Cell-To-Cell Signaling and Interaction, Cellular Assembly and Organization, Cellular Development, Cellular Function and Maintenance, Cellular Growth and Proliferation, Nervous System Development and Function, Tissue Development | developmental process of synapse               | 0.000763 |  | -1.71  | ADGRL3, CREB1, GABPA, SRPX2, THBS1, TNC, UTRN, WNT5A                                                                                                                                                   | 8  |
| Cellular Development, Connective Tissue Development and Function                                                                                                                                                                    | differentiation of fibroblast cell lines       | 0.000773 |  | -1.095 | CREB1, DLK1, ID4, JAG1, TGFB2, VDR, WNT5A                                                                                                                                                              | 7  |
| Cancer, Organismal Injury and Abnormalities                                                                                                                                                                                         | embryonal tumor                                | 0.000774 |  |        | ATRX, C4A/C4B, CXCR4, FLT1, MUC5AC, NANOG, STAG2, UTRN, WNT5A, ZFX                                                                                                                                     | 10 |
| Cellular Assembly and Organization, Cellular Function and Maintenance                                                                                                                                                               | organization of cytoskeleton                   | 0.000778 |  | -1.803 | ADAM10, ANGPT2, ATRX, CALU, CREB1, CXCL12, CXCR4, EDNRA, FLT1, IQGAP1, NANOG, NEFH, PCM1, PDE4DIP, PRKACB, RAB23, RAPGEF3, S100A4, SEMA6A, SMAD5, SPAG5, SYT1, TGFB2, THBS1, TM4SF1, TNC, VLDLR, WNT5A | 28 |
| Organismal Injury and Abnormalities                                                                                                                                                                                                 | Edema                                          | 0.000791 |  | 1.415  | ANGPT2, CALCRL, CREB1, CXCR4, EDNRA, ENTPD1, FLT1, GPX2, MECOM, SMAD5, TFRC                                                                                                                            | 11 |
| Cancer, Organismal Injury and Abnormalities, Renal and Urological Disease                                                                                                                                                           | Renal Cancer and Tumors                        | 0.000795 |  |        | ADAMTS9, ATRX, CALCRL, CES2, CYP4F3, ENPEP, FLT1, HNF1B, KCNMA1, MAGI1, MAST4, MECOM, MLXIPL, MUC5AC, PDE4DIP, PROX1, SLC26A4, STAG2, SULT1C2, THBS1, THSD7A, TSPAN5, UTRN                             | 23 |
| Cellular Movement, Hematological System Development and Function, Immune Cell Trafficking                                                                                                                                           | cell movement of mononuclear leukocytes        | 0.000795 |  | -1.502 | ADAM10, ANGPT2, CEACAM1, CXCL12, CXCR4, EFS, FLT1, HNRNPL, MCAM, S100A4, TG, THBS1, WNT5A                                                                                                              | 13 |
| Cellular Compromise                                                                                                                                                                                                                 | dysfunction of cells                           | 0.000814 |  | -0.254 | ANGPT2, CXCL12, CXCR4, NEFH                                                                                                                                                                            | 4  |
| Cancer, Organismal Injury and Abnormalities, Renal and Urological Disease                                                                                                                                                           | kidney adenocarcinoma formation                | 0.000814 |  |        | ATRX, CALCRL, CES2, CYP4F3, ENPEP, FLT1, HNF1B, KCNMA1, MAGI1, MAST4, MECOM, MLXIPL, MUC5AC, PDE4DIP, PROX1, SLC26A4, STAG2, SULT1C2, THBS1, THSD7A, TSPAN5                                            | 21 |
| Cellular Development, Cellular Growth and Proliferation                                                                                                                                                                             | cell proliferation of breast cancer cell lines | 0.000818 |  | -1.15  | CEACAM1, CHN2, CREB1, CXCL12, CXCR4, NANOG, PTGER2, S100A4, TES, TNC, UTRN, VDR, WNT5A                                                                                                                 | 13 |
| Gastrointestinal Disease, Hepatic System Disease, Inflammatory Disease, Organismal Injury and Abnormalities                                                                                                                         | primary biliary cirrhosis                      | 0.000828 |  |        | CXCR4, DLK1, JAG1, TGFB2, WNT5A                                                                                                                                                                        | 5  |
| Cell-To-Cell Signaling and Interaction, Hematological System Development and Function                                                                                                                                               | binding of B-lymphocyte derived cell lines     | 0.000845 |  |        | CXCL12, STK4, TNC                                                                                                                                                                                      | 3  |

Table G: Gene Functions Data Shown in Figure 6

|                                                                                                                                                       |                                                       |          |  |        |                                                                                     |    |
|-------------------------------------------------------------------------------------------------------------------------------------------------------|-------------------------------------------------------|----------|--|--------|-------------------------------------------------------------------------------------|----|
| Cellular Development, Tissue Development                                                                                                              | epithelial-mesenchymal transition of epithelial cells | 0.000845 |  |        | CLIC4,PDCD4,S100A4                                                                  | 3  |
| Cellular Development, Tissue Development                                                                                                              | differentiation of epithelial tissue                  | 0.000845 |  | 1      | ADAMTS9,ANGPT2,CEACAM1,CLIC4,CXCR4,FLT1,HNF1B,JAG1,PROX1,STK4,VDR                   | 11 |
| Cardiovascular Disease, Organismal Injury and Abnormalities                                                                                           | peripheral arterial disease                           | 0.00088  |  |        | CXCL12,CXCR4,DNAJB4,MBNL2,PDE4DIP,PTGER2,TGFB2,THBS1                                | 8  |
| Developmental Disorder                                                                                                                                | dysgenesis                                            | 0.000882 |  | 1.792  | ATRX,CALCRL,DLK1,EDNRA,HNF1B,ITGB1BP1,MECOM,NCOA2,SSBP2,TGFB2,THBS1,VDR,VLDLR,WNT5A | 14 |
| Cell-To-Cell Signaling and Interaction, Hematological System Development and Function                                                                 | binding of T lymphocytes                              | 0.000889 |  | -1.607 | CXCL12,CXCR4,MCAM,STK4,THBS1,TNC                                                    | 6  |
| Cardiovascular Disease, Cardiovascular System Development and Function, Organ Morphology, Organismal Development, Organismal Injury and Abnormalities | ventricular hypertrophy                               | 0.000889 |  |        | ANGPT2,CXCL12,MBNL1,MBNL2,RAPGEF3,VDR                                               | 6  |
| Cellular Growth and Proliferation                                                                                                                     | outgrowth of cells                                    | 0.000895 |  | -1.692 | ADAM10,CREB1,CXCL12,FLT1,IQGAP1,NEFH,S100A4,SEMA6A,THBS1,TNC,VLDLR,WNT5A            | 12 |
| Cellular Movement, Immune Cell Trafficking                                                                                                            | cell movement of lymphatic system cells               | 0.000908 |  | -1.443 | ADAM10,CEACAM1,CXCL12,CXCR4,EFS,HNRNPL,MCAM,PROX1,S100A4,TG,THBS1,WNT5A             | 12 |
| Cancer, Organismal Injury and Abnormalities                                                                                                           | metastasis of cells                                   | 0.000917 |  | -1.803 | ANGPT2,CREB1,CXCR4,MCAM,S100A4,TCF7L2,THBS1,TM4SF1,WNT5A                            | 9  |
| Cardiovascular System Development and Function, Organ Development                                                                                     | heart rate                                            | 0.000935 |  | -0.239 | ANGPT2,CXCR4,EDNRA,FLT1,SMAD5,TG,TGFB2,THBS1,VDR                                    | 9  |
| Cellular Movement, Embryonic Development                                                                                                              | movement of mesenchymal stem cells                    | 0.000946 |  |        | CXCL12,CXCR4,S100A4                                                                 | 3  |
| Cellular Movement                                                                                                                                     | dissemination of tumor cell lines                     | 0.000946 |  |        | CXCL12,CXCR4,SENP7                                                                  | 3  |
| Tissue Morphology                                                                                                                                     | quantity of cervical cancer cell lines                | 0.000946 |  |        | KIF13A,MLXIPL,PDCD6                                                                 | 3  |

Table G: Gene Functions Data Shown in Figure 6

|                                                                                                                                                   |                                                |          |        |  |                                                                                                                                                                                                                                                                                                                                                                                                      |    |
|---------------------------------------------------------------------------------------------------------------------------------------------------|------------------------------------------------|----------|--------|--|------------------------------------------------------------------------------------------------------------------------------------------------------------------------------------------------------------------------------------------------------------------------------------------------------------------------------------------------------------------------------------------------------|----|
| Cancer,Gastrointestinal Disease,Organismal Injury and Abnormalities                                                                               | high grade salivary duct carcinoma             | 0.000946 |        |  | PRKACB,TLK1,TNC                                                                                                                                                                                                                                                                                                                                                                                      | 3  |
| Cardiovascular System Development and Function,Organismal Development,Tissue Morphology                                                           | density of microvessel                         | 0.000946 |        |  | FLT1,JAG1,PTGER2                                                                                                                                                                                                                                                                                                                                                                                     | 3  |
| Cancer,Gastrointestinal Disease,Organismal Injury and Abnormalities                                                                               | colon carcinoma                                | 0.00095  |        |  | ADAMTS9,ALDH6A1,ALLC,ANGPT2,ATRX,CALCR,CES2,CYP4F2,EDIL3,ELF1,ENPEP,FAM216A,FERM T1,FHL1,FLT1,HNRNPL,JAG1,KCNMA1,KIF13A,LEPR,LTBP1,MAGI1,MAP4K5,MAST4,MBNL1,MECOM, MIA2,MLXIPL,MUC5AC,NCOA2,NEFH,NFASC,NR1D2,OVGP1,PCM1,PDE4DIP,PGGT1B,RAPGEF3,RAS AL2,RIOK3,SEMA4G,SEMA6A,SENP7,SLC13A2,SLC38A2,SLC39A4,SSBP2,SYT1,TCF7L2,TES,TFRC,T G,THBS1,TNC,TUBAL3,UTRN,VPS13D,WNT5A,ZFR,ZFX,ZFY,ZNF480,ZNF711 | 63 |
| Organismal Development                                                                                                                            | developme nt of endocrine gland                | 0.000951 |        |  | CREB1,HNF1B,TCF7L2,THBS1,VDR,WNT5A                                                                                                                                                                                                                                                                                                                                                                   | 6  |
| Cancer,Organismal Injury and Abnormalities                                                                                                        | malignant neoplasm of aerodigestiv e tract     | 0.000962 |        |  | ABCC9,ADAM10,CALCR,CES2,CPE,CXCL12,CXCR4,DPT,EDIL3,ENPEP,FHL5,FLT1,NEFH,OVGP1,PC M1,PRKACB,PROX1,SSBP2,TG,THSD7A,TLK1,TM4SF1,TNC,TPCN1,UTRN                                                                                                                                                                                                                                                          | 25 |
| Cardiovascular System Development and Function,Organismal Development                                                                             | developme nt of artery                         | 0.000983 |        |  | CREB1,CXCR4,EMP1,FLT1,LTBP1,TGFB2                                                                                                                                                                                                                                                                                                                                                                    | 6  |
| Connective Tissue Development and Function,Organ Morphology,Organismal Development,Reproductive System Development and Function,Tissue Morphology | mass of epididymal fat                         | 0.000984 |        |  | MLXIPL,RAPGEF3,VDR,VLDLR                                                                                                                                                                                                                                                                                                                                                                             | 4  |
| Cancer,Hematological Disease,Immunological Disease,Organismal Injury and Abnormalities                                                            | lymphoma                                       | 0.000985 | 1.457  |  | ABCC9,ADAMTS9,ANGPT2,BAG2,CXCL12,CXCR4,DPT,FERMT1,FILIP1L,HIST1H2BK,HNF1B,IQGAP1, MAP4K5,MCAM,MIA2,MLXIPL,NCOA2,PDCD4,RSPH14,S100A4,SSBP2,TGFB2,THBS1                                                                                                                                                                                                                                                | 23 |
| Cardiovascular System Development and Function,Organ Morphology,Organismal Development                                                            | enlargemen t of left ventricle                 | 0.000986 |        |  | ANGPT2,MBNL1,MBNL2,STK4,VDR                                                                                                                                                                                                                                                                                                                                                                          | 5  |
| Cellular Development,Connective Tissue Development and Function,Tissue Development                                                                | differentiati on of osteoblastic lineage cells | 0.000994 | -1.455 |  | DLK1,EDNRA,ID4,JAG1,PLCL2,SMAD5,TGFB2,TNC,TPM4                                                                                                                                                                                                                                                                                                                                                       | 9  |
| Inflammatory Response                                                                                                                             | inflammatio n of absolute anatomical region    | 0.000998 | 0.051  |  | ABHD6,ANGPT2,C4A/C4B,CEACAM1,CREB1,CXCL12,EDNRA,EFS,ELF1,ENTPD1,FERMT1,FLT1,GPX2 ,HSF2,JAG1,PDCD4,PTGER2,RAPGEF3,S100A4,TAF13,TANK,TFRC,THBS1,VDR                                                                                                                                                                                                                                                    | 24 |
| Cell-To-Cell Signaling and Interaction,Cellular Movement                                                                                          | recruitment of myeloid cells                   | 0.00101  | -1.179 |  | ADAM10,ANGPT2,CXCL12,CXCR4,EDIL3,FLT1,S100A4,THBS1,VDR                                                                                                                                                                                                                                                                                                                                               | 9  |

Table G: Gene Functions Data Shown in Figure 6

|                                                                            |                                           |         |  |        |                                                                                                                        |    |
|----------------------------------------------------------------------------|-------------------------------------------|---------|--|--------|------------------------------------------------------------------------------------------------------------------------|----|
| Cell-To-Cell Signaling and Interaction, Cellular Assembly and Organization | formation of intercellular junctions      | 0.00101 |  | -1.697 | ADGRL3, CREB1, GABPA, NFASC, SRPX2, THBS1, TNC, UTRN, WNT5A                                                            | 9  |
| Cell Death and Survival                                                    | cell viability of connective tissue cells | 0.00102 |  | 0.314  | CALCR, CXCL12, FLT1, LEPR, PDCD4, TANK                                                                                 | 6  |
| Hematological System Development and Function, Organismal Functions        | coagulation of blood                      | 0.00102 |  |        | C4A/C4B, CALU, CXCL12, CYP4F2, ENTPD1, PROZ, THBS1                                                                     | 7  |
| Cancer, Gastrointestinal Disease, Organismal Injury and Abnormalities      | salivary gland cancer                     | 0.00105 |  |        | PRKACB, SSBP2, TLK1, TNC                                                                                               | 4  |
| Cancer, Hematological Disease, Organismal Injury and Abnormalities         | B-cell malignant tumor                    | 0.00105 |  |        | ABCC9, CXCL12, CXCR4, DPT, FERMT1, FILIP1L, HIST1H2BK, HNF1B, IQGAP1, MAP4K5, MLXIPL, NCOA2, PDCD4, SSBP2, TFRC, TGFB2 | 16 |
| Carbohydrate Metabolism, Energy Production                                 | metabolism of pyruvic acid                | 0.00105 |  |        | ME2, MLXIPL, VLDLR                                                                                                     | 3  |

Table H: Upstream Regulators shown in Figure 7

| Upstream Regulator                                           | Expr Fold Change | Molecule Type                       | Predicted Activation State | Activation Z-score | p-value of overlap | Target molecules in dataset                                                                                                                                                                                           |
|--------------------------------------------------------------|------------------|-------------------------------------|----------------------------|--------------------|--------------------|-----------------------------------------------------------------------------------------------------------------------------------------------------------------------------------------------------------------------|
| CG                                                           |                  | complex                             | Inhibited                  | -3.283             | 0.000059           | CXCR4,DPT,EMP1,FAM198B,FGL2,FHL1,LEPR,MCAM,PTGER2,TGFB2,TM4SF1                                                                                                                                                        |
| OSM                                                          |                  | cytokine                            | Inhibited                  | -2.855             | 0.000465           | ANGPT2,CXCL12,CYP4F3,JAG1,PDCD4,PGGT1B,SMAD5,STK4,TM4SF1,TNC,VDR,WNT5A                                                                                                                                                |
| EDN1                                                         |                  | cytokine                            | Inhibited                  | -2.595             | 1.66E-06           | BAG2,CALCRL,CXCR4,EDNRA,LEPR,MCAM,PTGER2,THBS1,TNC,TPM4                                                                                                                                                               |
| Vegf                                                         |                  | group                               | Inhibited                  | -2.395             | 7.02E-07           | ADAM10,ANGPT2,BAG2,CALCRL,CXCL12,CXCR4,EMP1,ENTPD1,FAM198B,FLT1,GRB10,LYVE1,MAGI1,NCOA2,SMAD5,TNC                                                                                                                     |
| TGFB1                                                        |                  | growth factor                       | Inhibited                  | -2.325             | 2.02E-08           | ADAM10,CALCR,CEACAM1,CLIC4,CXCL12,CXCR4,DNAJB4,EDNRA,FERMT1,FHL1,FILIP1L,FLT1,ITD4,JAG1,LTBP1,LYVE1,MBNL2,MIA2,MLXIPL,MSMO1,MUC5AC,NUPR1,PDCD4,PTGER2,RAPGEF3,S100A4,SLC22A18,TFRC,TG,TGFB2,THBS1,TNC,USH1C,VDR,WNT5A |
| ESR1                                                         |                  | ligand-dependent nuclear receptor   | Inhibited                  | -2.166             | 5.34E-07           | CPE,CREB1,CXCL12,FHL1,IQGAP1,ITGB1BP1,KCNMA1,KIF13A,LEPR,LTBP1,MAGI1,MAP4K5,MUC5AC,NR1D2,PCM1,PDCD4,PRKACB,SLC38A2,SLC39A4,SMAD5,STAG2,STK4,SULT1C2,TCF7L2,TFRC,TGFB2,TM4SF1                                          |
| E. coli B5 lipopolysaccharide                                |                  | chemical - endogenous non-mammalian | Inhibited                  | -2                 | 0.118              | CXCR4,MLXIPL,TGFB2,THBS1                                                                                                                                                                                              |
| mir-223                                                      |                  | microRNA                            | Inhibited                  | -2                 | 0.0141             | EMP1,FAM198B,FGL2,MSMO1                                                                                                                                                                                               |
| NFKBIA                                                       |                  | transcription regulator             | Inhibited                  | -2                 | 0.0948             | CXCL12,CXCR4,MUC5AC,TFRC,TGFB2,TNC                                                                                                                                                                                    |
| TGFB1                                                        |                  | kinase                              |                            | -1.982             | 0.00241            | ID4,JAG1,LTBP1,NANOG                                                                                                                                                                                                  |
| Akt                                                          |                  | group                               |                            | -1.976             | 0.000744           | CXCL12,CXCR4,MCAM,PTGER2,SYT1,THBS1,TNC,UTRN                                                                                                                                                                          |
| IL6                                                          |                  | cytokine                            |                            | -1.919             | 0.0369             | CALCR,CEACAM1,CES2,CXCR4,MIA2,TFRC,THBS1,TNC,VLDLR,WNT5A                                                                                                                                                              |
| STAT3                                                        |                  | transcription regulator             |                            | -1.912             | 0.00218            | ANGPT2,CEACAM1,CREB1,CXCL12,CXCR4,FGL2,FLT1,JAG1,LEPR,THBS1,WNT5A                                                                                                                                                     |
| bleomycin                                                    |                  | chemical drug                       |                            | -1.783             | 4.13E-05           | ANGPT2,CXCR4,LTBP1,PTGER2,S100A4,TGFB2,THBS1,WNT5A                                                                                                                                                                    |
| AR                                                           |                  | ligand-dependent nuclear receptor   |                            | -1.664             | 0.0048             | C4A/C4B,CALU,CXCL12,EDNRA,MSMO1,NUPR1,OVGP1,TGFB2,THBS1                                                                                                                                                               |
| prostaglandin E2                                             |                  | chemical - endogenous mammalian     |                            | -1.661             | 0.000352           | ANGPT2,CALCR,CXCL12,CXCR4,ENTPD1,FLT1,MUC5AC,PTGER2,THBS1                                                                                                                                                             |
| tamoxifen                                                    |                  | chemical drug                       |                            | -1.446             | 0.00336            | CPE,CXCL12,CXCR4,DLK1,MUC5AC,PTGER2,VDR                                                                                                                                                                               |
| metribolone                                                  |                  | chemical reagent                    |                            | -1.446             | 0.0176             | CXCR4,NCOA2,PRKACB,THBS1,TM4SF1                                                                                                                                                                                       |
| HGF                                                          |                  | growth factor                       |                            | -1.405             | 5.38E-07           | ANGPT2,BAG2,CALCR,CALCRL,CXCR4,EMP1,ENTPD1,FLT1,GRB10,LYVE1,NANOG,NCOA2,SMAD5,TGFB2,THBS1,VDR                                                                                                                         |
| MYC                                                          |                  | transcription regulator             |                            | -1.343             | 0.00216            | ANGPT2,CLIC4,EIF2S1,EMP1,GGH,ME2,MUC5AC,NANOG,PDCD4,PRKACB,TES,TFRC,TGFB2,THBS1,TNC,VLDLR,WNT5A                                                                                                                       |
| Salmonella enterica serotype abortus equi lipopolysaccharide |                  | chemical toxicant                   |                            | -1.342             | 0.00773            | DNAJB4,FLT1,MBNL1,THBS1,WNT5A                                                                                                                                                                                         |
| mibolerone                                                   |                  | chemical drug                       |                            | -1.342             | 0.00303            | C4A/C4B,CALU,CEACAM1,EIF2S1,FHL1                                                                                                                                                                                      |
| ERK                                                          |                  | group                               |                            | -1.34              | 0.0279             | ADAM10,JAG1,MCAM,MUC5AC,THBS1                                                                                                                                                                                         |
| decitabine                                                   |                  | chemical drug                       |                            | -1.301             | 0.00391            | ABO,CXCL12,CXCR4,FILIP1L,JAG1,LEPR,TFRC,TGFB2,THBS1,WNT5A                                                                                                                                                             |
| SB203580                                                     |                  | chemical - kinase inhibitor         |                            | -1.234             | 0.00029            | ADAMTS9,C4A/C4B,CEACAM1,CREB1,FLT1,MUC5AC,NEFH,TGFB2,THBS1,VDR                                                                                                                                                        |
| Insulin                                                      |                  | group                               |                            | -1.21              | 0.0184             | ADAM10,GRB10,LEPR,MLXIPL,SLC38A2,SLC38A3,VLDLR                                                                                                                                                                        |
| PTEN                                                         |                  | phosphatase                         |                            | -1.2               | 0.0182             | ANGPT2,CXCR4,FLT1,ID4,JAG1,PDCD4,TAF13,THBS1                                                                                                                                                                          |

Table H: Upstream Regulators shown in Figure 7

|                        |      |                                   |  |        |          |                                                                                                                                                                                              |
|------------------------|------|-----------------------------------|--|--------|----------|----------------------------------------------------------------------------------------------------------------------------------------------------------------------------------------------|
| PTGS2                  |      | enzyme                            |  | -1.157 | 0.000179 | ANGPT2,CXCL12,CXCR4,DLK1,EDNRA,FLT1,PTGER2                                                                                                                                                   |
| F2R                    |      | G-protein coupled receptor        |  | -1.131 | 0.0011   | ANGPT2,CXCL12,FLT1,THBS1                                                                                                                                                                     |
| ERK1/2                 |      | group                             |  | -1.118 | 0.00137  | ANGPT2,CXCL12,CXCR4,FLT1,LEPR,MUC5AC,NANOG,PTGER2                                                                                                                                            |
| fluticasone propionate |      | chemical drug                     |  | -1.109 | 0.0083   | EMP1,MDFIC,MUC5AC,PTGER2,THBS1                                                                                                                                                               |
| PI3K (complex)         |      | complex                           |  | -1.109 | 0.0188   | CREB1,CXCR4,MCAM,NANOG,PDCD4,THBS1                                                                                                                                                           |
| SNAI2                  |      | transcription regulator           |  | -1.109 | 5.08E-05 | CXCL12,CXCR4,ID4,NANOG,VDR                                                                                                                                                                   |
| methylprednisolone     |      | chemical drug                     |  | -1.081 | 0.0153   | ABCC9,CYP4F3,EMP1,FGL2,LYVE1,MDFIC,MLXIPL,SLCO2A1,TFRC                                                                                                                                       |
| D-glucose              |      | chemical - endogenous mammalian   |  | -1.071 | 0.0457   | ANGPT2,CXCR4,JAG1,MLXIPL,PDCD4,S100A4,TFRC,THBS1                                                                                                                                             |
| TP53                   |      | transcription regulator           |  | -1.019 | 0.0013   | CALU,CES2,CLIC4,CXCL12,EDIL3,FHL1,GABPA,KCNMA1,LTBP1,MAP4K5,MBNL2,MCAM,ME2,NANOG,NUPR1,S100A4,SEMA6A,TANK,TCF7L2,TGFB2,THBS1,VDR                                                             |
| 8-bromo-cAMP           |      | chemical reagent                  |  | -1.015 | 0.039    | CREB1,ENTPD1,TGFB2,VLDLR                                                                                                                                                                     |
| isobutylmethylxanthine |      | chemical toxicant                 |  | -1     | 0.0212   | CALCR,CREB1,CXCR4,NCOA2                                                                                                                                                                      |
| MMP9                   |      | peptidase                         |  | -1     | 0.0023   | CALCR,CXCL12,CXCR4,JAG1                                                                                                                                                                      |
| CDKN1A                 |      | kinase                            |  | -1     | 0.0207   | ATRX,EDNRA,JAG1,MBNL2,SPAG5                                                                                                                                                                  |
| ciprofibrate           |      | chemical drug                     |  | -1     | 0.0212   | CEACAM1,CXCL12,LHPP,SLCO2A1                                                                                                                                                                  |
| SOX4                   |      | transcription regulator           |  | -0.97  | 0.0021   | EMP1,ENPEP,FHL1,MAGI1,MAP4K5,TES                                                                                                                                                             |
| HIF1A                  |      | transcription regulator           |  | -0.843 | 0.000621 | ADAM10,CXCL12,CXCR4,CYP4F3,FHL1,FLT1,HIST1H2BK,TFRC,TGFB2,THBS1                                                                                                                              |
| KLF4                   |      | transcription regulator           |  | -0.826 | 0.0361   | FLT1,NANOG,TGFB2,TNC,WNT5A                                                                                                                                                                   |
| poly rI:rC-RNA         |      | biologic drug                     |  | -0.823 | 0.00126  | ADAM10,CEACAM1,CXCR4,CYP4F2,NANOG,SLC26A4,TANK,TG,THBS1,WNT5A                                                                                                                                |
| bucladesine            |      | chemical toxicant                 |  | -0.78  | 0.00191  | CALCR,CREB1,CXCR4,ID4,MCAM,TGFB2,UTRN,VDR                                                                                                                                                    |
| DICER1                 |      | enzyme                            |  | -0.762 | 0.000899 | ANGPT2,CXCR4,ENTPD1,MCAM,NEFH,PDCD4,THBS1,TM4SF1                                                                                                                                             |
| WNT3A                  |      | cytokine                          |  | -0.755 | 0.00229  | ADAM10,CXCL12,NANOG,TGFB2,THBS1,TNC,WNT5A                                                                                                                                                    |
| beta-estradiol         |      | chemical - endogenous mammalian   |  | -0.718 | 3.71E-06 | C4A/C4B,CALCR,CREB1,CXCL12,CXCR4,EIF2S1,ELF1,EMP1,FHL1,GRB10,HNF1B,ID4,IQGAP1,JAG1,LEPR,LTBP1,MSMO1,NCOA2,NUPR1,PDCD4,PTGER2,SLC38A2,SSBP2,SULT1C2,TANK,TGFB2,THBS1,TM4SF1,TSPAN5,VDR,WNT5A  |
| TGFB2                  | -1.8 | growth factor                     |  | -0.715 | 0.000889 | ID4,JAG1,TGFB2,THBS1,VDR                                                                                                                                                                     |
| trichostatin A         |      | chemical drug                     |  | -0.705 | 0.00416  | CXCL12,CXCR4,ELF1,FLT1,LEPR,MBNL1,NEFH,SSBP2,THBS1,UTRN,WNT5A                                                                                                                                |
| IL2                    |      | cytokine                          |  | -0.696 | 0.00706  | CEACAM1,CREB1,CXCL12,CXCR4,ELF1,EMP1,ENTPD1,FGL2,PDCD4,S100A4                                                                                                                                |
| ACVRL1                 |      | kinase                            |  | -0.686 | 0.0001   | ANGPT2,CXCL12,CXCR4,LYVE1                                                                                                                                                                    |
| FGF2                   |      | growth factor                     |  | -0.666 | 0.00029  | ANGPT2,CXCL12,CXCR4,FLT1,LYVE1,MCAM,MUC5AC,S100A4,TGFB2,THBS1                                                                                                                                |
| tretinoin              |      | chemical - endogenous mammalian   |  | -0.66  | 4.43E-08 | ADAM10,CALCR,CEACAM1,CHN2,CPE,CXCR4,CYP4F2,CYP4F3,EFS,FERMT1,FLT1,GPX2,GRB10,HNF1B,LEPR,MECOM,MUC5AC,NCOA2,NEFH,PDCD4,RASAL2,SLC38A2,SLCO2A1,SMAD5,TFRC,TGFB2,THBS1,TNC,TPCN1,TPM4,VDR,WNT5A |
| HMOX1                  |      | enzyme                            |  | -0.651 | 0.00124  | ANGPT2,CXCL12,FLT1,TGFB2,THBS1                                                                                                                                                               |
| PGR                    |      | ligand-dependent nuclear receptor |  | -0.647 | 0.0153   | DNAJB4,EDNRA,GRB10,TM4SF1,TNC,VDR                                                                                                                                                            |
| ATF4                   |      | transcription regulator           |  | -0.64  | 0.000842 | GRB10,JAG1,NUPR1,SLC38A2,SLC38A3,SSBP2                                                                                                                                                       |
| TNF                    |      | cytokine                          |  | -0.619 | 0.000696 | ANGPT2,CLIC4,CREB1,CXCL12,CXCR4,EMP1,FAM198B,FERMT1,FLT1,JAG1,LYVE1,MAGI1,MCAM,MECOM,MUC5AC,NCOA2,NEFH,TFRC,TG,TGFB2,THBS1,TM4SF1,TNC,VDR,WNT5A                                              |
| resveratrol            |      | chemical drug                     |  | -0.61  | 0.00533  | CYP4F2,JAG1,MUC5AC,PDCD4,TFRC,TGFB2,VDR                                                                                                                                                      |
| dexamethasone          |      | chemical drug                     |  | -0.584 | 0.000207 | ADAM10,ALDH6A1,CALCR,CEACAM1,CES2,CLIC4,CPE,CXCL12,CXCR4,DLK1,EDNRA,FILIP1L,IQGAP1,JAG1,LYVE1,MUC5AC,PDCD4,PLCL2,SLCO2A1,SMAD5,TFRC,TGFB2,THBS1,TNC,VDR,WNT5A                                |



Table H: Upstream Regulators shown in Figure 7

|                             |      |                                 |  |        |          |                                                                                                                                            |
|-----------------------------|------|---------------------------------|--|--------|----------|--------------------------------------------------------------------------------------------------------------------------------------------|
| progesterone                |      | chemical - endogenous mammalian |  | -0.571 | 0.00396  | CXCL12,CXCR4,DNAJB4,EDNRA,ENPEP,FLT1,GRB10,LEPR,PTGER2,TGFB2,VDR                                                                           |
| CD40LG                      |      | cytokine                        |  | -0.555 | 0.00718  | CXCR4,EIF2S1,FLT1,NEFH,STK4,TANK,TFRC,WNT5A                                                                                                |
| TGM2                        |      | enzyme                          |  | -0.555 | 0.0238   | CEACAM1,CYP4F3,FERMT1,THBS1,TPCN1                                                                                                          |
| spironolactone              |      | chemical drug                   |  | -0.555 | 0.00253  | CXCR4,KCNMA1,MLXIPL,SLCO2A1                                                                                                                |
| EGF                         |      | growth factor                   |  | -0.512 | 0.0107   | CXCR4,FLT1,MUC5AC,NCOA2,PDCD4,S100A4,THBS1,TNC,VDR                                                                                         |
| EPO                         |      | cytokine                        |  | -0.487 | 0.000249 | ANGPT2,CXCL12,CXCR4,MIA2,NUPR1,PDCD4,PLCL2,TFRC,ZNF711                                                                                     |
| EGFR                        |      | kinase                          |  | -0.456 | 0.00729  | CXCL12,CXCR4,JAG1,MUC5AC,PTGER2,THBS1,TNC,VDR                                                                                              |
| VCAN                        |      | other                           |  | -0.447 | 0.00258  | ADAMTS9,C4A/C4B,CPE,CXCL12,TCF7L2                                                                                                          |
| ADCYAP1                     |      | other                           |  | -0.447 | 0.0275   | BAG2,CREB1,EDIL3,MCAM,TGFB2                                                                                                                |
| CEBPB                       |      | transcription regulator         |  | -0.415 | 0.00942  | CXCR4,FHL1,LEPR,NUPR1,SLC38A2,TM4SF1,VDR,VLDLR                                                                                             |
| cyclosporin A               |      | biologic drug                   |  | -0.415 | 1.86E-05 | C4A/C4B,CREB1,CXCR4,EDIL3,EDNRA,FLT1,GPX2,LYVE1,PDCD4,PRKACB,TANK,UTRN,WNT5A                                                               |
| lipopolysaccharide          |      | chemical drug                   |  | -0.367 | 0.0025   | ANGPT2,CALCR,CEACAM1,CLIC4,CXCL12,CXCR4,CYP4F2,FLT1,JAG1,MUC5AC,NUPR1,PDCD4,PTGER2,SLCO2A1,TANK,TCF7L2,TFRC,TGFB2,THBS1,TNC,UTRN,VDR,VLDLR |
| PPIF                        |      | enzyme                          |  | -0.277 | 0.00491  | CXCL12,CXCR4,DLK1,WNT5A                                                                                                                    |
| P38 MAPK                    |      | group                           |  | -0.256 | 0.00487  | CXCL12,CXCR4,CYP4F3,MUC5AC,THBS1,VDR,VLDLR,WNT5A                                                                                           |
| AGT                         |      | growth factor                   |  | -0.25  | 0.00149  | ANGPT2,CREB1,EDNRA,FLT1,JAG1,LEPR,MSMO1,SEMA6A,TFRC,TGFB2                                                                                  |
| cyclic AMP                  |      | chemical - endogenous mammalian |  | -0.218 | 0.0393   | CREB1,FLT1,PTGER2,RAPGEF3,TG                                                                                                               |
| LY294002                    |      | chemical - kinase inhibitor     |  | -0.207 | 7.19E-05 | ENTPD1,FLT1,GRB10,HNF1B,NANOG,NEFH,PTGER2,SLC38A3,SPAG5,SULT1C2,TG,THBS1,WNT5A                                                             |
| F2                          |      | peptidase                       |  | -0.184 | 0.000116 | ADAMTS9,ANGPT2,CXCR4,ENTPD1,FHL1,FLT1,KIF13A,TGFB2,THBS1                                                                                   |
| IKBKB                       |      | kinase                          |  | -0.152 | 0.0128   | CALCR,CXCL12,CXCR4,MUC5AC,S100A4,TNC                                                                                                       |
| rosiglitazone               |      | chemical drug                   |  | -0.128 | 0.0326   | ABCC9,C4A/C4B,CREB1,EDNRA,THBS1,TNC,VLDLR                                                                                                  |
| GATA6                       |      | transcription regulator         |  | -0.055 | 0.000267 | C4A/C4B,DLK1,HNF1B,LTBP1,LYVE1,NANOG,TGFB2                                                                                                 |
| VEGFA                       |      | growth factor                   |  | -0.011 | 3.19E-05 | ANGPT2,CEACAM1,CLIC4,CXCL12,CXCR4,FLT1,GRB10,ME2,THBS1,TNC                                                                                 |
| Hdac                        |      | group                           |  | 0      | 0.0295   | ADGRL3,CXCR4,EDNRA,HNF1B                                                                                                                   |
| Nr1h                        |      | group                           |  | 0      | 0.0221   | EDNRA,FLT1,THBS1,VLDLR                                                                                                                     |
| Nfat (family)               |      | group                           |  | 0      | 0.00421  | CALCR,FHL1,KIF13A,TGFB2                                                                                                                    |
| OGA                         |      | enzyme                          |  | 0      | 0.000337 | CALCRL,CEACAM1,CPE,ELF1,HSF2,MCAM,MSMO1,THBS1,TNC,TSPAN5                                                                                   |
| IRF4                        |      | transcription regulator         |  | 0      | 0.0216   | CXCR4,ENTPD1,FLT1,PDCD6                                                                                                                    |
| CD44                        |      | other                           |  | 0      | 0.0157   | LTBP1,NANOG,PDCD4,THBS1,WNT5A                                                                                                              |
| ANGPT2                      | -1.8 | growth factor                   |  | 0      | 0.00261  | DNAJB4,LEPR,MAP4K5,PDCD4,SPTLC3,THBS1                                                                                                      |
| INSIG1                      |      | other                           |  | 0      | 0.0063   | CXCR4,CYP4F2,DLK1,MLXIPL                                                                                                                   |
| ERG                         |      | transcription regulator         |  | 0      | 0.00289  | CXCR4,FHL1,FLT1,MAG11,THBS1,UTRN                                                                                                           |
| SMARCB1                     |      | transcription regulator         |  | 0      | 0.0337   | C4A/C4B,CEACAM1,CXCR4,SMAD5                                                                                                                |
| phorbol myristate acetate   |      | chemical drug                   |  | 0.049  | 0.00517  | ANGPT2,CALCR,CPE,CREB1,CXCR4,FHL5,FLT1,LEPR,LYVE1,MAST4,MUC5AC,PDCD4,PTGER2,THBS1,VDR,VLDLR                                                |
| BMP7                        |      | growth factor                   |  | 0.068  | 0.0123   | DLK1,GRB10,S100A4,SMAD5                                                                                                                    |
| medroxyprogesterone acetate |      | chemical drug                   |  | 0.068  | 0.0134   | ANGPT2,CXCR4,TNC,WNT5A                                                                                                                     |
| LEP                         |      | growth factor                   |  | 0.069  | 0.000328 | ANGPT2,DLK1,FLT1,LEPR,MLXIPL,MSMO1,MUC5AC,SLC13A2,TG,THBS1,WNT5A                                                                           |
| FGFR2                       |      | kinase                          |  | 0.185  | 0.00241  | CPE,ENPEP,FAM198B,GRB10,NANOG                                                                                                              |
| FSH                         |      | complex                         |  | 0.2    | 6.26E-06 | CPE,CXCR4,FILIP1L,HSF2,ID4,MSMO1,PTGER2,RASAL2,SMAD5,TFRC,TGFB2,THBS1,TLK1                                                                 |

Table H: Upstream Regulators shown in Figure 7

|                          |      |                                 |  |       |          |                                                                                                                                                                                    |
|--------------------------|------|---------------------------------|--|-------|----------|------------------------------------------------------------------------------------------------------------------------------------------------------------------------------------|
| TNFSF11                  |      | cytokine                        |  | 0.205 | 0.0377   | CALCR,GABPA,GRB10,PTGER2,TSPAN5                                                                                                                                                    |
| tetrachlorodibenzodioxin |      | chemical toxicant               |  | 0.254 | 0.00536  | ENPEP,JAG1,MUC5AC,S100A4,SLC38A3,TGFB2,TNC,VLDLR                                                                                                                                   |
| ERBB3                    |      | kinase                          |  | 0.29  | 0.000434 | CXCL12,CXCR4,STAG2,THBS1,TNC                                                                                                                                                       |
| IFNG                     |      | cytokine                        |  | 0.303 | 0.0002   | ADAMTS9,C4A/C4B,CEACAM1,CLIC4,CXCL12,CXCR4,EDNRA,FGL2,FLT1,JAG1,KCNMA1,NUPR1,RSPH14,TCF7L2,TFRC,TG,TGFB2,THBS1,VDR,VLDLR,WNT5A,ZFX                                                 |
| CREB1                    | -1.7 | transcription regulator         |  | 0.308 | 0.000231 | CREB1,CXCR4,EDIL3,ENTPD1,FGL2,FLT1,MCAM,MSMO1,MUC5AC,SSBP2,TAF13,TFRC,TG                                                                                                           |
| fulvestrant              |      | chemical drug                   |  | 0.363 | 0.000642 | CXCL12,FLT1,GABPA,LEPR,PDCD4,TFRC,TGFB2,ZFX                                                                                                                                        |
| PKD1                     |      | ion channel                     |  | 0.391 | 0.00997  | CALCR,EDIL3,LTBP1,SLC13A2,ZNF711                                                                                                                                                   |
| calcitriol               |      | chemical drug                   |  | 0.4   | 0.000212 | ANGPT2,CALCR,ENPEP,LTBP1,NUPR1,PDCD4,PTGER2,SPAG5,SULT1C2,TGFB2,THBS1,TLK1,VD                                                                                                      |
| IL13                     |      | cytokine                        |  | 0.403 | 0.000126 | CALCR,CHN2,CXCR4,JAG1,LTBP1,MSMO1,MUC5AC,PCM1,SLC26A4,THBS1,WNT5A                                                                                                                  |
| IL15                     |      | cytokine                        |  | 0.403 | 0.0348   | CEACAM1,CXCL12,CXCR4,ID4,PDCD4,TFRC,VDR                                                                                                                                            |
| SP1                      |      | transcription regulator         |  | 0.415 | 0.0186   | CEACAM1,CXCL12,CXCR4,FLT1,ID4,MUC5AC,TGFB2,TNC,VDR                                                                                                                                 |
| TP73                     |      | transcription regulator         |  | 0.43  | 0.0338   | ADAM10,JAG1,LTBP1,NUPR1,THBS1,VDR                                                                                                                                                  |
| CEBPA                    |      | transcription regulator         |  | 0.437 | 0.000061 | CXCR4,FHL1,FLT1,GABPA,GGH,HNF1B,LEPR,TANK,TGFB2,THBS1,VDR,VLDLR                                                                                                                    |
| NOTCH1                   |      | transcription regulator         |  | 0.449 | 7.65E-05 | DLK1,FLT1,JAG1,LYVE1,MCAM,MUC5AC,PROX1,TGFB2,WNT5A                                                                                                                                 |
| forskolin                |      | chemical toxicant               |  | 0.483 | 0.00913  | CALCR,CREB1,CXCR4,MSMO1,NCOA2,RAPGEF3,RASAL2,THBS1,TLK1,TM4SF1,VDR                                                                                                                 |
| CSF3                     |      | cytokine                        |  | 0.508 | 0.035    | CXCL12,CXCR4,ENTPD1,TFRC                                                                                                                                                           |
| Lh                       |      | complex                         |  | 0.577 | 0.00046  | CREB1,CXCR4,MSMO1,RAPGEF3,RASAL2,TGFB2,THBS1,TLK1                                                                                                                                  |
| raloxifene               |      | chemical drug                   |  | 0.6   | 0.000241 | CALCR,CXCL12,GABPA,TFRC,TGFB2,TM4SF1,ZFX                                                                                                                                           |
| indomethacin             |      | chemical drug                   |  | 0.6   | 0.00178  | ANGPT2,C4A/C4B,CXCR4,FLT1,GPX2,TES,VDR                                                                                                                                             |
| testosterone             |      | chemical - endogenous mammalian |  | 0.6   | 0.0329   | ABCC9,EIF2S1,TG,TGFB2,THBS1,WNT5A                                                                                                                                                  |
| NS-398                   |      | chemical reagent                |  | 0.651 | 3.64E-05 | ANGPT2,CXCR4,MAGI1,MUC5AC,PDCD4,TFRC                                                                                                                                               |
| L-dopa                   |      | chemical - endogenous mammalian |  | 0.671 | 0.000103 | C4A/C4B,CXCL12,DLK1,GRB10,HNRNPL,IQGAP1,ITGB1BP1,LTBP1,MBNL2,MSMO1,PDCD4,PDE4DIP,SLC22A18,SLC38A2,VLDLR                                                                            |
| IGF1                     |      | growth factor                   |  | 0.711 | 0.00267  | ANGPT2,C4A/C4B,CREB1,LEPR,MUC5AC,NEFH,NUPR1,TG,THBS1                                                                                                                               |
| valproic acid            |      | chemical drug                   |  | 0.728 | 0.000443 | BAG2,CXCR4,EIF2S1,ELF1,MSMO1,S100A4,SSBP2,TES,THBS1,UTRN,WNT5A                                                                                                                     |
| docosahexaenoic acid     |      | chemical drug                   |  | 0.762 | 0.0295   | CXCR4,MLXIPL,TGFB2,THBS1                                                                                                                                                           |
| triamcinolone acetonide  |      | chemical drug                   |  | 0.816 | 0.00415  | EDNRA,EFS,SEMA6A,TCF7L2,TGFB2,VLDLR                                                                                                                                                |
| estrogen receptor        |      | group                           |  | 0.816 | 0.00769  | CXCL12,CXCR4,JAG1,TGFB2,TNC,WNT5A                                                                                                                                                  |
| RBPJ                     |      | transcription regulator         |  | 0.849 | 0.00353  | CXCL12,JAG1,TGFB2,TNC,WNT5A                                                                                                                                                        |
| ERBB2                    |      | kinase                          |  | 0.861 | 0.000338 | BAG2,CDC40,CXCL12,DPT,EMP1,FLT1,JAG1,PDCD4,RETREG1,S100A4,SPAG5,THBS1,TNC,VDR,WNT5A                                                                                                |
| KLF2                     |      | transcription regulator         |  | 0.865 | 1.51E-05 | ANGPT2,CXCR4,FLT1,LEPR,SLCO2A1,TFRC,TGFB2,THBS1                                                                                                                                    |
| TP63                     |      | transcription regulator         |  | 0.954 | 2.12E-05 | CEACAM1,CXCR4,EMP1,GPX2,JAG1,NANOG,S100A4,TGFB2,THBS1,TNC,VDR,WNT5A                                                                                                                |
| HNF4A                    |      | transcription regulator         |  | 0.971 | 0.000694 | ABHD6,C4A/C4B,CEACAM1,CES2,CYP4F2,CYP4F3,DNAJB4,FAM216A,FHL1,GABPA,GPX2,HNF1B,MLXIPL,NXT2,PATJ,PDCD4,PDE4DIP,PGGT1B,PROZ,RIOK3,SLC22A18,SULT1C2,TCF7L2,TFRC,TNC,TPCN1,USH1C,ZNF277 |
| SOX2                     |      | transcription regulator         |  | 1     | 0.00769  | CXCR4,ELF1,FLT1,JAG1,NANOG,TGFB2,WNT5A                                                                                                                                             |
| trans-hydroxytamoxifen   |      | chemical drug                   |  | 1     | 0.0101   | CALCR,CXCL12,TGFB2,TM4SF1                                                                                                                                                          |
| topotecan                |      | chemical drug                   |  | 1     | 0.0431   | C4A/C4B,KCNMA1,MBNL2,TANK                                                                                                                                                          |
| ethionine                |      | chemical toxicant               |  | 1     | 0.000173 | C4A/C4B,GPX2,NANOG,TES                                                                                                                                                             |
| PD98059                  |      | chemical - kinase inhibitor     |  | 1.05  | 0.0064   | ANGPT2,CREB1,CXCR4,EMP1,ENTPD1,MUC5AC,S100A4,SLC38A2,THBS1,VDR                                                                                                                     |

Table H: Upstream Regulators shown in Figure 7

|                                              |  |                                 |           |       |          |                                                                         |
|----------------------------------------------|--|---------------------------------|-----------|-------|----------|-------------------------------------------------------------------------|
| PRKCD                                        |  | kinase                          |           | 1.067 | 0.0403   | CXCL12,MAST4,MUC5AC,PDCD4                                               |
| FOXA1                                        |  | transcription regulator         |           | 1.086 | 0.000787 | ALDH6A1,HNF1B,JAG1,MLXIPL,MUC5AC,NANOG                                  |
| JUN                                          |  | transcription regulator         |           | 1.091 | 0.016    | LTBP1,NANOG,NEFH,SLC38A2,THBS1,TNC,VDR,WNT5A                            |
| HNF1A                                        |  | transcription regulator         |           | 1.134 | 9.03E-05 | ABCC9,ENPEP,GPX2,HNF1B,KIF13A,MIA2,MLXIPL,PAMR1,PATJ,SULT1C2,TFRC,VLDLR |
| GDF2                                         |  | growth factor                   |           | 1.179 | 0.000434 | CXCL12,CXCR4,DLK1,LYVE1,PROX1                                           |
| mir-21                                       |  | microRNA                        |           | 1.188 | 0.0377   | FGL2,JAG1,LEPR,PDCD4,SMAD5                                              |
| sirolimus                                    |  | chemical drug                   |           | 1.195 | 0.0296   | CXCR4,EIF2S1,LEPR,MAP4K5,NANOG,PDCD4,S100A4,SLC38A3                     |
| deferoxamine                                 |  | chemical drug                   |           | 1.253 | 0.0143   | ANGPT2,FLT1,TFRC,TGFB2,VDR                                              |
| hydrogen peroxide                            |  | chemical - endogenous mammalian |           | 1.328 | 0.0249   | CXCR4,MCAM,MSMO1,MUC5AC,PDCD4,RIOK3,TFRC,VDR                            |
| IL17A                                        |  | cytokine                        |           | 1.331 | 0.00114  | CXCL12,EDIL3,ENTPD1,JAG1,MLXIPL,MUC5AC,TNC                              |
| FEV                                          |  | transcription regulator         |           | 1.342 | 0.00039  | CALCR,CXCR4,PROX1,SYT1,TCF7L2                                           |
| MAPK1                                        |  | kinase                          |           | 1.387 | 0.0377   | EMP1,MUC5AC,NANOG,NUPR1,PTGER2,VDR                                      |
| nitric oxide                                 |  | chemical - endogenous mammalian |           | 1.445 | 0.0278   | CXCL12,FLT1,TFRC,THBS1                                                  |
| ERBB4                                        |  | kinase                          |           | 1.606 | 0.00344  | CXCL12,STAG2,THBS1,TNC                                                  |
| APP                                          |  | other                           |           | 1.954 | 1        | C4A/C4B,CXCL12,CXCR4,MAGI1,PDCD4                                        |
| miR-1-3p (and other miRNAs w/seed GGAAUGU)   |  | mature microRNA                 |           | 1.977 | 0.0515   | PDCD4,THBS1,TPM4,UTRN                                                   |
| Immunoglobulin                               |  | complex                         |           | 1.982 | 0.0971   | CHN2,ENTPD1,TCF7L2,TFRC                                                 |
| mir-1                                        |  | microRNA                        | Activated | 2     | 0.00115  | CREB1,NXT2,PDCD4,TMX1,UTRN                                              |
| miR-30c-5p (and other miRNAs w/seed GUAAACA) |  | mature microRNA                 | Activated | 2     | 0.00794  | ATRX,MBNL1,SLC38A2,WNT5A                                                |
| INSR                                         |  | kinase                          | Activated | 2.19  | 0.00218  | ALDH6A1,CXCR4,DLK1,FHL1,GRB10,IQGAP1,LEPR,MSMO1,PDCD4                   |
| DGCR8                                        |  | enzyme                          | Activated | 2.213 | 3.22E-05 | ID4,JAG1,PDCD4,TCF7L2,TNC                                               |
| miR-124-3p (and other miRNAs w/seed AAGGCAC) |  | mature microRNA                 | Activated | 2.213 | 0.0266   | CPNE3,IQGAP1,JAG1,MDFIC,SMAD5                                           |
| CSF2                                         |  | cytokine                        | Activated | 2.391 | 0.000111 | C4A/C4B,CEACAM1,CREB1,CXCR4,FLT1,GABPA,PROZ,PTGER2,SPAG5,THBS1,TPM4,VDR |
| platelet activating factor                   |  | chemical - endogenous mammalian |           |       | 0.00654  | ANGPT2,MUC5AC,THBS1                                                     |
| 16,16-dimethylprostaglandin E2               |  | chemical - endogenous mammalian |           |       | 0.0492   | PTGER2                                                                  |
| 12(R)-hydroxyeicosatetraenoic acid           |  | chemical - endogenous mammalian |           |       | 0.00718  | MUC5AC                                                                  |
| propylthiouracil                             |  | chemical drug                   |           |       | 0.00721  | DLK1,ENPEP,TG,VLDLR                                                     |
| PP1                                          |  | chemical - kinase inhibitor     |           |       | 0.0304   | ANGPT2,CXCR4                                                            |
| dextran sulfate                              |  | chemical drug                   |           |       | 0.0297   | C4A/C4B,PROZ,SPAG5,TGFB2,THBS1                                          |

Table H: Upstream Regulators shown in Figure 7

|                             |  |                                     |  |  |          |                               |
|-----------------------------|--|-------------------------------------|--|--|----------|-------------------------------|
| xanthine                    |  | chemical - endogenous mammalian     |  |  | 0.0044   | CXCR4,MUC5AC                  |
| L-threonine                 |  | chemical - endogenous mammalian     |  |  | 0.00222  | EIF2S1,NANOG                  |
| hyaluronic acid             |  | chemical - endogenous mammalian     |  |  | 0.048    | CXCR4,PDCD4,TGFB2             |
| allopurinol                 |  | chemical drug                       |  |  | 0.0226   | C4A/C4B,GPX2,TES              |
| peptidoglycan               |  | chemical - endogenous non-mammalian |  |  | 0.0449   | CXCR4,MUC5AC,VDR              |
| nitroglycerin               |  | chemical drug                       |  |  | 0.0027   | ADAM10,FLT1                   |
| dexamethasone phosphate     |  | chemical drug                       |  |  | 0.000658 | CXCR4,LYVE1,THBS1             |
| nitrate                     |  | chemical - endogenous mammalian     |  |  | 0.0354   | TG                            |
| chloride                    |  | chemical - endogenous mammalian     |  |  | 0.0214   | SLC26A4                       |
| fludrocortisone             |  | chemical drug                       |  |  | 0.0354   | CXCR4                         |
| ATP                         |  | chemical - endogenous mammalian     |  |  | 0.0363   | ADAMTS9,CXCR4,THBS1           |
| triamcinolone               |  | chemical drug                       |  |  | 0.0423   | CALCR                         |
| deflazacort                 |  | chemical drug                       |  |  | 0.00718  | EDNRA                         |
| CD300LF                     |  | other                               |  |  | 0.0214   | CALCR                         |
| bevacizumab                 |  | biologic drug                       |  |  | 2.95E-05 | ANGPT2,CXCL12,CXCR4           |
| Cobra Venom Factor          |  | chemical - endogenous non-mammalian |  |  | 0.0423   | TGFB2                         |
| zibotentan                  |  | chemical drug                       |  |  | 0.0284   | EDNRA                         |
| hydroxamic acid             |  | chemical - other                    |  |  | 0.00718  | CXCR4                         |
| STAT5a/b                    |  | group                               |  |  | 0.0279   | EMP1,LEPR,PROX1               |
| iodide                      |  | chemical - endogenous mammalian     |  |  | 0.0423   | SLC26A4                       |
| mineralocorticoid           |  | chemical drug                       |  |  | 0.0214   | SLC26A4                       |
| deoxycorticosterone acetate |  | chemical drug                       |  |  | 0.0127   | SLC26A4,TNC                   |
| Cyclin D                    |  | group                               |  |  | 0.0492   | NANOG                         |
| TGFBR                       |  | group                               |  |  | 0.0423   | WNT5A                         |
| Rar                         |  | group                               |  |  | 0.0234   | ADAM10,CYP4F2                 |
| Ctnna                       |  | group                               |  |  | 0.0354   | CXCR4                         |
| Ap1                         |  | complex                             |  |  | 0.00513  | CXCL12,MUC5AC,S100A4,UTRN,VDR |

Table H: Upstream Regulators shown in Figure 7

|                          |  |                                 |  |          |                              |
|--------------------------|--|---------------------------------|--|----------|------------------------------|
| Rxr                      |  | group                           |  | 0.0063   | ADAM10,CYP4F2,DLK1,HNF1B     |
| TD114-2                  |  | chemical - kinase inhibitor     |  | 0.00718  | NANOG                        |
| conjugated linoleic acid |  | chemical drug                   |  | 0.0304   | CALCR,CXCR4                  |
| CYP2R1                   |  | enzyme                          |  | 0.00718  | VDR                          |
| HOXD8                    |  | transcription regulator         |  | 0.000754 | ANGPT2,PROX1                 |
| GLDN                     |  | other                           |  | 0.0214   | NFASC                        |
| VIPAS39                  |  | other                           |  | 0.0423   | THBS1                        |
| DAND5                    |  | other                           |  | 0.0284   | NANOG                        |
| FOXN4                    |  | transcription regulator         |  | 0.0354   | PROX1                        |
| indican                  |  | chemical - endogenous mammalian |  | 0.00104  | ANGPT2,CXCR4,THBS1           |
| ZNF652                   |  | other                           |  | 0.0492   | TGFB2                        |
| GPR17                    |  | G-protein coupled receptor      |  | 0.0214   | RAPGEF3                      |
| elocalcitol              |  | chemical drug                   |  | 0.0354   | TGFB2                        |
| MARCH7                   |  | other                           |  | 0.00718  | NANOG                        |
| Meg3                     |  | other                           |  | 0.000304 | FLT1,IQGAP1                  |
| CHI3L1                   |  | enzyme                          |  | 0.0149   | EMP1,TNC                     |
| CLEC1B                   |  | transmembrane receptor          |  | 0.00322  | CXCL12,TNC                   |
| SV2B                     |  | transporter                     |  | 0.00718  | SYT1                         |
| BTNL2                    |  | transmembrane receptor          |  | 0.0168   | ENTPD1,FGL2,S100A4           |
| RNF31                    |  | enzyme                          |  | 0.0108   | CXCR4,KCNMA1                 |
| MIR17HG                  |  | other                           |  | 0.0127   | CREB1,HNF1B                  |
| NQO2                     |  | enzyme                          |  | 0.00222  | CXCL12,CXCR4                 |
| MARCH2                   |  | enzyme                          |  | 0.0143   | TFRC                         |
| TRPS1                    |  | transcription regulator         |  | 0.000578 | KCNMA1,SEMA6A,VDR            |
| AGO1                     |  | translation regulator           |  | 0.0492   | CXCR4                        |
| TACSTD2                  |  | other                           |  | 0.0284   | CREB1                        |
| Collagen(s)              |  | complex                         |  | 0.00413  | C4A/C4B,THBS1,TNC            |
| MYLIP                    |  | enzyme                          |  | 0.0214   | VLDLR                        |
| IGF1R                    |  | transmembrane receptor          |  | 0.0398   | CALU,DLK1,GRB10,NANOG,S100A4 |
| NLN                      |  | peptidase                       |  | 0.0284   | CREB1                        |
| DUOX1                    |  | enzyme                          |  | 0.0143   | MUC5AC                       |
| SLC25A33                 |  | transporter                     |  | 0.0143   | GABPA                        |
| Laminin (complex)        |  | complex                         |  | 0.0366   | TGFB2,WNT5A                  |
| SRC (family)             |  | group                           |  | 0.0483   | FLT1,S100A4                  |
| Pde3                     |  | group                           |  | 0.0143   | ENTPD1                       |
| COL1A1                   |  | other                           |  | 0.00379  | CLIC4,CXCR4                  |
| SPDEF                    |  | transcription regulator         |  | 0.0129   | MUC5AC,TNC,WNT5A             |
| SRRT                     |  | other                           |  | 0.0143   | PDCD4                        |
| BMPR2                    |  | kinase                          |  | 0.0117   | CLIC4,CXCL12                 |
| ZG16B                    |  | other                           |  | 0.00718  | CXCR4                        |

Table H: Upstream Regulators shown in Figure 7

|                        |                                   |  |  |         |                                    |
|------------------------|-----------------------------------|--|--|---------|------------------------------------|
| SFRP5                  | transmembrane receptor            |  |  | 0.0492  | CXCR4                              |
| IL33                   | cytokine                          |  |  | 0.0295  | FLT1,JAG1,LEPR                     |
| KDM4B                  | enzyme                            |  |  | 0.0214  | NANOG                              |
| PRPF19                 | enzyme                            |  |  | 0.0354  | NANOG                              |
| PPP1R14B               | phosphatase                       |  |  | 0.0423  | FLT1                               |
| ZMYND10                | other                             |  |  | 0.0423  | THBS1                              |
| SULT2B1                | enzyme                            |  |  | 0.0354  | VLDLR                              |
| KDM4A                  | transcription regulator           |  |  | 0.00649 | FHL1,NANOG                         |
| NSD2                   | enzyme                            |  |  | 0.0304  | CXCR4,RAB23                        |
| SV2A                   | transporter                       |  |  | 0.0143  | SYT1                               |
| FOX11                  | transcription regulator           |  |  | 0.0354  | SLC26A4                            |
| AGO3                   | translation regulator             |  |  | 0.0143  | CXCR4                              |
| TRIM65                 | other                             |  |  | 0.0284  | PDCD4                              |
| SOX2-OCT4              | complex                           |  |  | 0.0492  | NANOG                              |
| PDS5B                  | other                             |  |  | 0.0492  | NANOG                              |
| Oxi-4503               | chemical drug                     |  |  | 0.00718 | CXCL12                             |
| RO4929097              | chemical drug                     |  |  | 0.0423  | JAG1                               |
| AMH                    | growth factor                     |  |  | 0.0149  | CEACAM1,SMAD5                      |
| LDL-cholesterol        | complex                           |  |  | 0.0423  | CXCR4                              |
| botulinum toxin type A | biologic drug                     |  |  | 0.0143  | S100A4                             |
| strontium ranelate     | chemical drug                     |  |  | 0.0492  | WNT5A                              |
| firtecane pegol        | chemical drug                     |  |  | 0.0284  | CXCR4                              |
| SRA1                   | transcription regulator           |  |  | 0.00983 | TGFB2,THBS1                        |
| GLRX3                  | enzyme                            |  |  | 0.0284  | TFRC                               |
| RRM2                   | enzyme                            |  |  | 0.0284  | THBS1                              |
| NR0B1                  | ligand-dependent nuclear receptor |  |  | 0.0334  | MLXIPL,NANOG                       |
| CCND1                  | transcription regulator           |  |  | 0.0338  | CALU,CPNE3,NANOG,PDCD4,UTRN,VPS13D |
| XDH                    | enzyme                            |  |  | 0.0275  | CXCR4,MUC5AC                       |
| DLL4                   | other                             |  |  | 0.0149  | FLT1,LYVE1                         |
| ASCL2                  | transcription regulator           |  |  | 0.0492  | CXCR4                              |
| PDGFD                  | growth factor                     |  |  | 0.0423  | CXCR4                              |
| PPP2R2C                | phosphatase                       |  |  | 0.0284  | NEFH                               |
| SRF                    | transcription regulator           |  |  | 0.035   | CXCR4,FHL1,FILIP1L,FLT1,LEPR,TNC   |
| hexachlorobenzene      | chemical toxicant                 |  |  | 0.008   | C4A/C4B,GPX2,TES                   |
| PGF                    | growth factor                     |  |  | 0.0289  | CXCR4,FLT1                         |
| LYL1                   | transcription regulator           |  |  | 0.00727 | ANGPT2,ID4                         |
| IL3RA                  | transmembrane receptor            |  |  | 0.0143  | PROX1                              |
| PI3K (family)          | group                             |  |  | 0.0381  | CXCL12,CXCR4,TNC                   |
| VHL                    | transcription regulator           |  |  | 0.0141  | CXCL12,CXCR4,FILIP1L,TFRC          |
| TFPI                   | other                             |  |  | 0.0423  | VLDLR                              |
| SMAD2                  | transcription regulator           |  |  | 0.0234  | FLT1,NANOG,THBS1                   |
| SELL                   | transmembrane receptor            |  |  | 0.0492  | CXCR4                              |
| CFB                    | peptidase                         |  |  | 0.00575 | C4A/C4B,TGFB2                      |

Table H: Upstream Regulators shown in Figure 7

|          |      |                            |  |  |         |                         |
|----------|------|----------------------------|--|--|---------|-------------------------|
| GMNN     |      | transcription regulator    |  |  | 0.0206  | NANOG,TGFB2,WNT5A       |
| SETD2    |      | enzyme                     |  |  | 0.0247  | FLT1,WNT5A              |
| TSHR     |      | G-protein coupled receptor |  |  | 0.0492  | TG                      |
| TTR      |      | transporter                |  |  | 0.0284  | TG                      |
| ZNF281   |      | transcription regulator    |  |  | 0.0284  | NANOG                   |
| RPS11    |      | other                      |  |  | 0.0284  | PDCD4                   |
| RAD23B   |      | other                      |  |  | 0.0143  | NANOG                   |
| A2M      |      | transporter                |  |  | 0.0466  | CREB1,WNT5A             |
| IBSP     |      | other                      |  |  | 0.0143  | THBS1                   |
| ADRA2B   |      | G-protein coupled receptor |  |  | 0.0284  | FLT1                    |
| PDIA4    |      | enzyme                     |  |  | 0.00718 | TG                      |
| INHBB    |      | growth factor              |  |  | 0.00575 | THBS1,TNC               |
| ACVR1    |      | kinase                     |  |  | 0.0431  | EDIL3,SRPX2             |
| PLEC     |      | other                      |  |  | 0.0214  | CXCR4                   |
| CELA2A   |      | peptidase                  |  |  | 0.0284  | MUC5AC                  |
| CDK9     |      | kinase                     |  |  | 0.00654 | CXCR4,MAGI1,WNT5A       |
| CAT      |      | enzyme                     |  |  | 0.00587 | MUC5AC,THBS1,TNC        |
| STC1     |      | kinase                     |  |  | 0.0423  | TGFB2                   |
| MSX2     |      | transcription regulator    |  |  | 0.0261  | PROX1,TGFB2             |
| ID1      |      | transcription regulator    |  |  | 0.0115  | CEACAM1,NANOG,TG        |
| C3AR1    |      | G-protein coupled receptor |  |  | 0.0466  | LTBP1,TGFB2             |
| ZFP36L2  |      | transcription regulator    |  |  | 0.0423  | NEFH                    |
| ADAM10   | -1.7 | peptidase                  |  |  | 0.00344 | ATRX,CALCRL,CXCL12,SYT1 |
| NRCAM    |      | other                      |  |  | 0.0214  | NFASC                   |
| DMD      |      | other                      |  |  | 0.0383  | KCNMA1,PAMR1,PROX1,UTRN |
| ZBTB46   |      | transcription regulator    |  |  | 0.0354  | CREB1                   |
| GNAS     |      | enzyme                     |  |  | 0.0398  | MUC5AC,TG               |
| Pzp      |      | other                      |  |  | 0.0423  | VLDLR                   |
| EGLN1    |      | enzyme                     |  |  | 0.00921 | ANGPT2,CXCR4,TGFB2      |
| KRT19    |      | other                      |  |  | 0.0423  | EIF2S1                  |
| CD24     |      | other                      |  |  | 0.00769 | MBNL1,MCAM,THBS1,VDR    |
| RASSF1   |      | other                      |  |  | 0.0271  | CPE,CXCR4,EMP1          |
| MMP14    |      | peptidase                  |  |  | 0.0221  | JAG1,SLCO2A1            |
| EIF3E    |      | other                      |  |  | 0.0334  | THBS1,TNC               |
| CCL18    |      | cytokine                   |  |  | 0.0492  | S100A4                  |
| FOXP3    |      | transcription regulator    |  |  | 0.0363  | ENTPD1,FGL2,PDCD4       |
| GFI1     |      | transcription regulator    |  |  | 0.0345  | CXCR4,ENTPD1,VDR        |
| SUMO2    |      | enzyme                     |  |  | 0.0289  | CEACAM1,TNC             |
| PROC     |      | peptidase                  |  |  | 0.0431  | ANGPT2,THBS1            |
| SERPINE1 |      | other                      |  |  | 0.0261  | DLK1,FLT1               |
| EAF2     |      | transcription regulator    |  |  | 0.0284  | THBS1                   |
| SMC3     |      | other                      |  |  | 0.00506 | CXCL12,THBS1            |
| MIR124   |      | group                      |  |  | 0.0195  | IQGAP1,NANOG            |

Table H: Upstream Regulators shown in Figure 7

|                                               |                         |  |  |          |                                |
|-----------------------------------------------|-------------------------|--|--|----------|--------------------------------|
| miR-291a-3p (and other miRNAs w/seed AAGUGCU) | mature microRNA         |  |  | 0.0256   | MBNL2,PRKACB,STK4              |
| miR-516a-3p (and other miRNAs w/seed GCUUCCU) | mature microRNA         |  |  | 0.0284   | WNT5A                          |
| miR-2682-5p (and other miRNAs w/seed AGGCAGU) | mature microRNA         |  |  | 0.0214   | CREB1                          |
| miR-18a-5p (and other miRNAs w/seed AAGGUGC)  | mature microRNA         |  |  | 0.00506  | HSF2,THBS1                     |
| mir-27                                        | microRNA                |  |  | 0.0062   | BAG2,FLT1,SEMA6A               |
| miR-183-5p (miRNAs w/seed AUGGCAC)            | mature microRNA         |  |  | 0.0354   | PDCD4                          |
| miR-141-3p (and other miRNAs w/seed AACACUG)  | mature microRNA         |  |  | 0.00725  | JAG1,NANOG,TGFB2               |
| mir-181                                       | microRNA                |  |  | 0.0415   | CREB1,NANOG                    |
| miR-137-3p (miRNAs w/seed UAUUGCU)            | mature microRNA         |  |  | 0.0214   | NCOA2                          |
| mir-128                                       | microRNA                |  |  | 0.0284   | BAG2                           |
| mir-122                                       | microRNA                |  |  | 0.0256   | CLIC4,CREB1,IQGAP1             |
| mir-320                                       | microRNA                |  |  | 0.0423   | TFRC                           |
| miR-21-5p (and other miRNAs w/seed AGCUUUAU)  | mature microRNA         |  |  | 0.00879  | JAG1,PDCD4,TGFB2               |
| mir-8                                         | microRNA                |  |  | 0.0226   | LEPR,SMAD5,TGFB2               |
| mir-135                                       | microRNA                |  |  | 0.016    | CXCL12,SMAD5                   |
| miR-23a-3p (and other miRNAs w/seed UCACAUU)  | mature microRNA         |  |  | 0.00894  | CXCL12,SMAD5                   |
| miR-802-5p (miRNAs w/seed CAGU AAC)           | mature microRNA         |  |  | 0.00718  | HNF1B                          |
| mir-663                                       | microRNA                |  |  | 0.0143   | CXCR4                          |
| mir-652                                       | microRNA                |  |  | 0.0143   | JAG1                           |
| miR-3118 (and other miRNAs w/seed GUGACUG)    | mature microRNA         |  |  | 0.000754 | CREB1,NANOG                    |
| AKT1                                          | kinase                  |  |  | 0.0449   | CXCR4,HNRNPL,MSMO1,TGFB2,THBS1 |
| NEUROG1                                       | transcription regulator |  |  | 0.0115   | FAM198B,S100A4,THBS1           |
| AGER                                          | transmembrane receptor  |  |  | 0.0151   | CALCR,FLT1,TNC                 |
| SOX18                                         | transcription regulator |  |  | 0.0354   | PROX1                          |
| STAT3-Brachyury                               | complex                 |  |  | 0.00718  | NANOG                          |
| NUBP1                                         | other                   |  |  | 0.0143   | TFRC                           |



Table H: Upstream Regulators shown in Figure 7

|        |      |                                   |  |          |                                           |
|--------|------|-----------------------------------|--|----------|-------------------------------------------|
| PTGER2 | -1.9 | G-protein coupled receptor        |  | 0.04     | CXCR4,SPAG5,THBS1                         |
| NQO1   |      | enzyme                            |  | 0.0289   | CXCL12,CXCR4                              |
| DNM1L  |      | enzyme                            |  | 0.0354   | NANOG                                     |
| RCE1   |      | peptidase                         |  | 0.00317  | CXCL12,TGFB2,ZFR                          |
| NKX2-1 |      | transcription regulator           |  | 0.041    | EDIL3,TG,TGFB2,THBS1                      |
| ATN1   |      | transcription regulator           |  | 0.016    | MCAM,NEFH,PRKACB,TM4SF1                   |
| EPHB4  |      | kinase                            |  | 0.00587  | CXCR4,TGFB2,WNT5A                         |
| ANKH   |      | transporter                       |  | 0.0284   | WNT5A                                     |
| SUMO3  |      | other                             |  | 0.0304   | CEACAM1,TNC                               |
| ANGPT1 |      | growth factor                     |  | 0.0319   | ANGPT2,JAG1                               |
| CYP4F2 | 4.2  | enzyme                            |  | 0.0492   | FLT1                                      |
| PTGES3 |      | enzyme                            |  | 0.00178  | NUPR1,TM4SF1                              |
| RNF4   |      | transcription regulator           |  | 0.0354   | GABPA                                     |
| SRSF3  |      | other                             |  | 0.0423   | PDCD4                                     |
| SDC4   |      | other                             |  | 0.0423   | ANGPT2                                    |
| SSPN   |      | other                             |  | 0.0423   | UTRN                                      |
| GLI2   |      | transcription regulator           |  | 0.0354   | JAG1,NANOG,VDR                            |
| LNX2   |      | other                             |  | 0.0027   | JAG1,TCF7L2                               |
| LIMA1  |      | other                             |  | 0.0027   | CREB1,VDR                                 |
| NR5A1  |      | ligand-dependent nuclear receptor |  | 0.0124   | ANGPT2,C4A/C4B,LEPR                       |
| MBP    |      | other                             |  | 0.0117   | LEPR,NEFH                                 |
| GUCA2B |      | other                             |  | 0.00718  | SLC26A4                                   |
| IGFBP3 |      | other                             |  | 0.0261   | LYVE1,TNC                                 |
| COL7A1 |      | other                             |  | 5.12E-05 | THBS1,WNT5A                               |
| GPS2   |      | transcription regulator           |  | 0.0466   | LHPP,MBNL1                                |
| NRP2   |      | kinase                            |  | 0.0214   | S100A4                                    |
| FTMT   |      | enzyme                            |  | 0.0214   | TFRC                                      |
| ETF1   |      | translation regulator             |  | 0.00718  | UTRN                                      |
| SP3    |      | transcription regulator           |  | 0.0196   | ANGPT2,CEACAM1,FLT1,MUC5AC,TNC            |
| FOXA2  |      | transcription regulator           |  | 0.00274  | CXCR4,DLK1,HNF1B,MLXIPL,MUC5AC,WNT5A      |
| SMAD4  |      | transcription regulator           |  | 0.025    | ANGPT2,JAG1,TGFB2,THBS1,TNC               |
| ELP1   |      | other                             |  | 0.0423   | FLT1                                      |
| IQGAP2 |      | other                             |  | 0.0284   | IQGAP1                                    |
| S100A4 | -2   | other                             |  | 0.0304   | CLIC4,THBS1                               |
| ATF1   |      | transcription regulator           |  | 0.0366   | CREB1,THBS1                               |
| IGFBP4 |      | other                             |  | 0.0492   | MCAM                                      |
| PTH    |      | other                             |  | 0.0251   | CXCL12,CXCR4,ID4,VDR                      |
| TRHR   |      | G-protein coupled receptor        |  | 0.0284   | LEPR                                      |
| GABPB1 |      | transcription regulator           |  | 0.00808  | TNC,UTRN                                  |
| RPL11  |      | other                             |  | 0.0423   | PDCD4                                     |
| FOLR1  |      | transporter                       |  | 0.00472  | PDCD4,RIOK3,S100A4,SLC13A2                |
| EP300  |      | transcription regulator           |  | 0.0363   | CXCR4,DNAJB4,NANOG,RAPGEF3,TGFB2,TNC,UTRN |
| RARB   |      | ligand-dependent nuclear receptor |  | 0.0256   | ADAM10,CXCL12,HNF1B                       |

Table H: Upstream Regulators shown in Figure 7

|                   |      |                             |  |          |                                                   |
|-------------------|------|-----------------------------|--|----------|---------------------------------------------------|
| FANCC             |      | other                       |  | 0.0135   | CXCL12,HNF1B,JAG1                                 |
| F7                |      | peptidase                   |  | 0.0221   | JAG1,PTGER2                                       |
| HOXA9             |      | transcription regulator     |  | 0.0085   | CALCRL,CREB1,EDNRA,MAP4K5,MBNL1                   |
| CYP11B2           |      | enzyme                      |  | 0.0284   | KCNMA1                                            |
| CEACAM1           | 1.52 | transporter                 |  | 0.0304   | ANGPT2,CXCR4                                      |
| GIPC1             |      | other                       |  | 0.0284   | PROX1                                             |
| VEGFC             |      | growth factor               |  | 0.0027   | CXCR4,PROX1                                       |
| PTGS1             |      | enzyme                      |  | 0.0261   | ANGPT2,PTGER2                                     |
| IL25              |      | cytokine                    |  | 0.0449   | FLT1,JAG1                                         |
| HNRNPA2B1         |      | other                       |  | 9.99E-07 | ATRX,ENTPD1,FHL1,LEPR,MAST4,SYT1,TGFB2,USH1C,UTRN |
| HTR4              |      | G-protein coupled receptor  |  | 0.0354   | CXCL12                                            |
| GCH1              |      | enzyme                      |  | 0.0143   | TNC                                               |
| SND1              |      | enzyme                      |  | 0.00116  | EMP1,JAG1,LTBP1                                   |
| NLRP12            |      | other                       |  | 0.0261   | CXCL12,CXCR4                                      |
| CTBP1             |      | enzyme                      |  | 0.0195   | THBS1,VDR                                         |
| PPP1R3A           |      | phosphatase                 |  | 0.00718  | THBS1                                             |
| FOXD3             |      | transcription regulator     |  | 0.00322  | CXCR4,NANOG                                       |
| FAS               |      | transmembrane receptor      |  | 0.0015   | CREB1,FGL2,FLT1,PLCL2,PTGER2,TFRC,TLK1,TNC,TPM4   |
| FBXL5             |      | enzyme                      |  | 0.0284   | TFRC                                              |
| RUVBL1            |      | transcription regulator     |  | 0.0334   | CYP4F3,HIST1H2BK                                  |
| KLK6              |      | peptidase                   |  | 0.0284   | ADAM10                                            |
| FOXE1             |      | transcription regulator     |  | 0.000304 | TG,WNT5A                                          |
| HNRNPL            | 1.56 | other                       |  | 0.0143   | CEACAM1                                           |
| MYRF              |      | transcription regulator     |  | 0.0354   | CEACAM1                                           |
| TIMP3             |      | other                       |  | 0.00575  | ADAM10,MUC5AC                                     |
| LASP1             |      | transporter                 |  | 0.0284   | S100A4                                            |
| MEF2A             |      | transcription regulator     |  | 0.0195   | SYT1,TGFB2                                        |
| SMAD3             |      | transcription regulator     |  | 0.00696  | JAG1,NANOG,SMAD5,TGFB2,THBS1,TNC                  |
| LAMC1             |      | other                       |  | 0.0044   | TGFB2,WNT5A                                       |
| MAD2L2            |      | enzyme                      |  | 0.0492   | NANOG                                             |
| GGT1              |      | enzyme                      |  | 0.0284   | MUC5AC                                            |
| ENG               |      | transmembrane receptor      |  | 0.0319   | CXCR4,THBS1                                       |
| FOXC2             |      | transcription regulator     |  | 0.0466   | CXCR4,WNT5A                                       |
| MEP1B             |      | peptidase                   |  | 0.0171   | GRB10,TFRC                                        |
| NEURL1            |      | enzyme                      |  | 0.0214   | JAG1                                              |
| PTCH2             |      | transmembrane receptor      |  | 0.000304 | CXCL12,JAG1                                       |
| AGO4              |      | translation regulator       |  | 0.0143   | CXCR4                                             |
| RPS5              |      | other                       |  | 0.0284   | PDCD4                                             |
| THBS1             | -1.5 | other                       |  | 0.0171   | TGFB2,THBS1                                       |
| Klf7              |      | transcription regulator     |  | 0.00718  | TG                                                |
| 2-bromoethylamine |      | chemical reagent            |  | 0.0483   | C4A/C4B,GPX2                                      |
| IND S7            |      | chemical - kinase inhibitor |  | 0.0171   | CALU,HNRNPL                                       |

Table H: Upstream Regulators shown in Figure 7

|                        |      |                                   |  |          |                                                   |
|------------------------|------|-----------------------------------|--|----------|---------------------------------------------------|
| GNL3                   |      | other                             |  | 0.0117   | EDNRA,NANOG                                       |
| MEL S3                 |      | chemical - kinase inhibitor       |  | 0.0183   | CALU,HNRNPL                                       |
| ACKR3                  |      | G-protein coupled receptor        |  | 0.0138   | CXCL12,CXCR4                                      |
| NR2F2                  |      | ligand-dependent nuclear receptor |  | 0.0304   | HNF1B,PROX1                                       |
| LMNB1                  |      | other                             |  | 0.000491 | CXCL12,MSMO1,TGFB2,ZFR                            |
| ATXN3                  |      | peptidase                         |  | 0.00139  | CREB1,CXCL12                                      |
| WNT11                  |      | other                             |  | 0.0195   | NANOG,TGFB2                                       |
| TG                     | 1.53 | other                             |  | 0.00141  | ANGPT2,SLC26A4,TG                                 |
| A130040M12Rik          |      | other                             |  | 0.00718  | RAB23                                             |
| LRP1                   |      | transmembrane receptor            |  | 0.0261   | CREB1,WNT5A                                       |
| YY1                    |      | transcription regulator           |  | 0.00983  | CXCL12,CXCR4,DNAJB4,ID4,PROX1,TGFB2               |
| PGK1                   |      | kinase                            |  | 0.0492   | CXCR4                                             |
| KDM5B                  |      | transcription regulator           |  | 0.0168   | FHL1,ITGB1BP1,MCAM,TGFB2                          |
| CDK8                   |      | kinase                            |  | 0.00649  | CXCR4,MAGI1                                       |
| GABPA                  | -1.5 | transcription regulator           |  | 0.035    | TNC,UTRN                                          |
| SFPQ                   |      | transcription regulator           |  | 0.00983  | RAB23,SEMA6A                                      |
| HIVEP3                 |      | transcription regulator           |  | 0.0423   | S100A4                                            |
| GATA1                  |      | transcription regulator           |  | 0.00642  | ANGPT2,FHL1,LEPR,MECOM,NEFH,TFRC                  |
| FOXL1                  |      | transcription regulator           |  | 0.0143   | WNT5A                                             |
| JAM2                   |      | other                             |  | 0.00718  | CXCL12                                            |
| SRSF6                  |      | other                             |  | 0.0354   | TNC                                               |
| DRP2                   |      | other                             |  | 0.0143   | UTRN                                              |
| ABCB7                  |      | transporter                       |  | 0.0354   | TFRC                                              |
| RAP1A                  |      | enzyme                            |  | 0.0354   | TG                                                |
| FOXO3                  |      | transcription regulator           |  | 0.00153  | ANGPT2,CXCR4,JAG1,MBNL1,NUPR1,SPAG5,STK4,TGFB2    |
| VSNL1                  |      | other                             |  | 0.0284   | CREB1                                             |
| RPS18                  |      | other                             |  | 0.0284   | PDCD4                                             |
| TARBP2                 |      | other                             |  | 0.0492   | THBS1                                             |
| PAX3                   |      | transcription regulator           |  | 9.45E-05 | CXCR4,EIF2S1,FHL1,FILIP1L,ID4,MCAM,TGFB2,TNC      |
| STAMPB                 |      | enzyme                            |  | 0.0143   | CXCR4                                             |
| ANXA1                  |      | enzyme                            |  | 0.0195   | CXCR4,ITGB1BP1                                    |
| ITIH4                  |      | other                             |  | 0.00718  | VDR                                               |
| HRAS                   |      | enzyme                            |  | 0.0261   | CALU,CXCL12,FHL1,MCAM,MSMO1,S100A4,TG,TGFB2,THBS1 |
| AQP5                   |      | transporter                       |  | 0.0423   | MUC5AC                                            |
| MATK                   |      | kinase                            |  | 0.0214   | CXCR4                                             |
| TNFSF10                |      | cytokine                          |  | 0.0345   | ANGPT2,CXCR4,TFRC                                 |
| cetuximab/radiotherapy |      | biologic drug                     |  | 0.0214   | FLT1                                              |
| CSNK1A1                |      | kinase                            |  | 0.0284   | CXCR4                                             |
| CD164                  |      | other                             |  | 0.00718  | CXCR4                                             |
| EXT1                   |      | enzyme                            |  | 0.0423   | NANOG                                             |
| BMP2                   |      | growth factor                     |  | 0.0151   | CLIC4,CXCL12,ID4,TG,VDR                           |
| THBS4                  |      | other                             |  | 0.016    | TGFB2,TNC                                         |
| SFTPC                  |      | other                             |  | 0.000754 | MUC5AC,S100A4                                     |

Table H: Upstream Regulators shown in Figure 7

|                                      |      |                                     |  |  |          |                                                                      |
|--------------------------------------|------|-------------------------------------|--|--|----------|----------------------------------------------------------------------|
| NRXN1                                |      | transporter                         |  |  | 0.00155  | CXCL12, THBS1, TNC                                                   |
| DIO2                                 |      | enzyme                              |  |  | 0.0247   | NEFH, TG                                                             |
| 17beta-estradiol dendrimer conjugate |      | chemical reagent                    |  |  | 0.0143   | CALCR                                                                |
| PTPN3                                |      | phosphatase                         |  |  | 0.0214   | VDR                                                                  |
| IGKC                                 |      | other                               |  |  | 0.0423   | VDR                                                                  |
| NAB2                                 |      | transcription regulator             |  |  | 0.00808  | FLT1, ID4                                                            |
| FZD2                                 |      | G-protein coupled receptor          |  |  | 0.00718  | WNT5A                                                                |
| EHMT1                                |      | transcription regulator             |  |  | 0.0423   | NANOG                                                                |
| TFAP2C                               |      | transcription regulator             |  |  | 0.00964  | JAG1, NANOG, THBS1                                                   |
| tetramethylpyrazine                  |      | chemical - endogenous non-mammalian |  |  | 0.00718  | CXCR4                                                                |
| ERF                                  |      | transcription regulator             |  |  | 0.0423   | UTRN                                                                 |
| ELK1                                 |      | transcription regulator             |  |  | 0.0062   | MECOM, NUPR1, THBS1                                                  |
| CLCA1                                |      | ion channel                         |  |  | 0.0143   | MUC5AC                                                               |
| CTNNB1                               |      | transcription regulator             |  |  | 0.0355   | CEACAM1, CXCL12, EDIL3, GPX2, ID4, MECOM, NANOG, S100A4, TCF7L2, TNC |
| RPL35A                               |      | other                               |  |  | 0.0284   | PDCD4                                                                |
| YY2                                  |      | transcription regulator             |  |  | 0.0354   | CXCR4                                                                |
| EEF1A1                               |      | translation regulator               |  |  | 0.0214   | S100A4                                                               |
| GZMB                                 |      | peptidase                           |  |  | 0.0284   | ENTPD1                                                               |
| CALCA                                |      | other                               |  |  | 0.0286   | CALCR, CXCR4, FLT1                                                   |
| RPLP2                                |      | other                               |  |  | 0.0143   | PDCD4                                                                |
| Gm21596/Hmgb1                        |      | transcription regulator             |  |  | 0.00808  | CXCL12, CXCR4                                                        |
| Irgm1                                |      | other                               |  |  | 0.0382   | NUPR1, SPAG5                                                         |
| Hrg                                  |      | other                               |  |  | 0.0423   | ANGPT2                                                               |
| Foxe3                                |      | transcription regulator             |  |  | 0.0354   | PROX1                                                                |
| Muc1                                 |      | transmembrane receptor              |  |  | 0.0354   | MUC5AC                                                               |
| Naip1 (includes others)              |      | other                               |  |  | 0.0143   | MUC5AC                                                               |
| Nedd4                                |      | enzyme                              |  |  | 0.00718  | THBS1                                                                |
| RPL12                                |      | other                               |  |  | 0.0284   | PDCD4                                                                |
| OBP2B                                |      | transporter                         |  |  | 0.0423   | MLXIPL                                                               |
| CLEC2D                               |      | transmembrane receptor              |  |  | 0.0143   | CXCR4                                                                |
| PRR13                                |      | other                               |  |  | 0.00718  | THBS1                                                                |
| SLC19A1                              |      | transporter                         |  |  | 0.0492   | CALCR                                                                |
| SRSF2                                |      | transcription regulator             |  |  | 0.00467  | ABCC9, HNRNPL, MLXIPL                                                |
| SPINT1                               |      | other                               |  |  | 0.00506  | PROX1, WNT5A                                                         |
| ATF2                                 |      | transcription regulator             |  |  | 0.0279   | ENTPD1, NUPR1, TGFB2                                                 |
| WT1                                  |      | transcription regulator             |  |  | 0.000314 | CLIC4, GRB10, HNRNPL, ITGB1BP1, THBS1, TM4SF1, TSPAN5, VDR           |
| HOXA7                                |      | transcription regulator             |  |  | 0.0183   | CALCRL, EDNRA                                                        |
| PROX1                                | -2.2 | transcription regulator             |  |  | 0.0149   | ANGPT2, LYVE1                                                        |
| RAD21                                |      | transcription regulator             |  |  | 0.0221   | CXCL12, THBS1                                                        |
| ECM1                                 |      | transporter                         |  |  | 0.00506  | NANOG, S100A4                                                        |
| PMX 205                              |      | chemical reagent                    |  |  | 0.0214   | THBS1                                                                |

Table H: Upstream Regulators shown in Figure 7

|                                                               |  |                                 |  |  |         |                                 |
|---------------------------------------------------------------|--|---------------------------------|--|--|---------|---------------------------------|
| FTL                                                           |  | enzyme                          |  |  | 0.0214  | TFRC                            |
| RPS12                                                         |  | other                           |  |  | 0.0354  | PDCD4                           |
| CHCHD2                                                        |  | other                           |  |  | 0.0354  | NANOG                           |
| RPS15                                                         |  | other                           |  |  | 0.0354  | PDCD4                           |
| N-butyryl arginine                                            |  | chemical reagent                |  |  | 0.0214  | UTRN                            |
| 3-hydroxybutyrate arginate                                    |  | chemical reagent                |  |  | 0.0214  | UTRN                            |
| 1-(2-hydroxy-5-methylphenyl)-3-phenyl-1,3-propanedione        |  | chemical reagent                |  |  | 0.0284  | CREB1                           |
| gentamicin C                                                  |  | chemical drug                   |  |  | 0.0105  | C4A/C4B,GPX2,TES                |
| 4-[(4'-chloro-2'-fluoro)phenylamino]-6,7-dimethoxyquinazoline |  | chemical - kinase inhibitor     |  |  | 0.0143  | ANGPT2                          |
| chlorpromazine                                                |  | chemical drug                   |  |  | 0.0366  | CYP4F2,MSMO1                    |
| halofuginone                                                  |  | chemical drug                   |  |  | 0.00303 | C4A/C4B,EMP1,LTBP1,MLXIPL,WNT5A |
| pyridoxal phosphate-6-azophenyl-2',4'-disulfonic acid         |  | chemical reagent                |  |  | 0.0354  | THBS1                           |
| cyclophosphamide                                              |  | chemical drug                   |  |  | 0.0162  | C4A/C4B,GPX2,THBS1              |
| acrolein                                                      |  | chemical toxicant               |  |  | 0.00894 | ADAM10,MUC5AC                   |
| zoledronic acid                                               |  | chemical drug                   |  |  | 0.00184 | CXCR4,FLT1,WNT5A                |
| LG100268                                                      |  | chemical reagent                |  |  | 0.0334  | CYP4F2,CYP4F3                   |
| 4-(2-aminoethyl)benzenesulfonyl fluoride                      |  | chemical - protease inhibitor   |  |  | 0.0195  | SEN7,TNC                        |
| tacrolimus                                                    |  | chemical drug                   |  |  | 0.0134  | CHN2,CXCR4,PDCD4,PRKACB,TNC     |
| BMS-275183                                                    |  | chemical drug                   |  |  | 0.00718 | THBS1                           |
| phosphorylethanolamine                                        |  | chemical - endogenous mammalian |  |  | 0.0143  | FLT1                            |
| enalapril                                                     |  | biologic drug                   |  |  | 0.0062  | ANGPT2,C4A/C4B,GPX2             |
| methimazole                                                   |  | chemical drug                   |  |  | 0.0415  | TG,VLDLR                        |
| GW501516                                                      |  | chemical drug                   |  |  | 0.0372  | FLT1,THBS1,VLDLR                |
| acetazolamide                                                 |  | chemical drug                   |  |  | 0.0423  | SLC26A4                         |
| cilomilast                                                    |  | chemical drug                   |  |  | 0.0214  | CXCR4                           |
| rolipram                                                      |  | chemical drug                   |  |  | 0.0195  | CXCR4,MUC5AC                    |
| omeprazole                                                    |  | chemical drug                   |  |  | 0.0466  | CXCL12,CXCR4                    |
| N-ethylmaleimide                                              |  | chemical reagent                |  |  | 0.0214  | LEPR                            |
| plerixafor                                                    |  | chemical drug                   |  |  | 0.00894 | CXCL12,CXCR4                    |
| cibacron blue F 3GA                                           |  | chemical reagent                |  |  | 0.0214  | THBS1                           |
| 2-acetylaminofluorene                                         |  | chemical toxicant               |  |  | 0.00575 | DLK1,JAG1                       |
| fenamic acid                                                  |  | chemical reagent                |  |  | 0.0135  | C4A/C4B,GPX2,TES                |
| liarozole                                                     |  | chemical drug                   |  |  | 0.0284  | VDR                             |
| dinophysistoxin 1                                             |  | chemical toxicant               |  |  | 0.0143  | CEACAM1                         |
| BIBX1522                                                      |  | chemical - kinase inhibitor     |  |  | 0.0143  | MUC5AC                          |

Table H: Upstream Regulators shown in Figure 7

|                                                        |  |                               |  |          |                                                         |
|--------------------------------------------------------|--|-------------------------------|--|----------|---------------------------------------------------------|
| thalidomide                                            |  | chemical drug                 |  | 0.0261   | ANGPT2,KCNMA1                                           |
| captopril                                              |  | chemical drug                 |  | 0.0174   | C4A/C4B,GPX2,TGFB2                                      |
| dimethyl sulfoxide                                     |  | chemical drug                 |  | 0.0137   | DNAJB4,NUPR1,TFRC,VLDLR                                 |
| GW3965                                                 |  | chemical reagent              |  | 0.0162   | EDNRA,MLXIPL,VLDLR                                      |
| thioacetamide                                          |  | chemical toxicant             |  | 0.000425 | C4A/C4B,EMP1,GPX2,LTBP1,LYVE1,MLXIPL, TES, WNT5A        |
| hexaarginine-neomycin B conjugate                      |  | chemical reagent              |  | 0.0143   | CXCR4                                                   |
| histone deacetylase                                    |  | complex                       |  | 0.0319   | CXCR4,THBS1                                             |
| minodronate                                            |  | chemical drug                 |  | 0.0214   | CXCR4                                                   |
| retinoid                                               |  | chemical drug                 |  | 0.0382   | CEACAM1,MUC5AC                                          |
| triamterene                                            |  | chemical drug                 |  | 0.0119   | C4A/C4B,GPX2, TES                                       |
| phenacetin                                             |  | chemical drug                 |  | 0.0366   | GPX2, TES                                               |
| SB-431542                                              |  | chemical reagent              |  | 0.0319   | CLIC4,NANOG,TGFB2                                       |
| NSC 651016                                             |  | chemical reagent              |  | 0.0143   | CXCR4                                                   |
| nabumetone                                             |  | chemical drug                 |  | 0.00718  | UTRN                                                    |
| etodolac                                               |  | chemical drug                 |  | 0.0214   | THBS1                                                   |
| semaxinib                                              |  | chemical drug                 |  | 0.0234   | FHL1,THBS1                                              |
| trichosanthin                                          |  | chemical drug                 |  | 0.0143   | JAG1                                                    |
| H-7                                                    |  | chemical - kinase inhibitor   |  | 0.035    | ANGPT2,VDR                                              |
| nisoldipine                                            |  | chemical drug                 |  | 0.0143   | CREB1                                                   |
| 4-tert-octylphenol                                     |  | chemical toxicant             |  | 0.0208   | EMP1,TANK                                               |
| propyl gallate                                         |  | chemical toxicant             |  | 0.0423   | MUC5AC                                                  |
| tert-butyl-hydroquinone                                |  | chemical reagent              |  | 0.0241   | GPX2,NEFH,WNT5A                                         |
| nitroprusside                                          |  | chemical drug                 |  | 0.0483   | CREB1,FLT1                                              |
| cobalt chloride                                        |  | chemical reagent              |  | 0.0168   | CXCR4,FLT1,TFRC                                         |
| potassium perchlorate                                  |  | chemical reagent              |  | 0.0354   | TG                                                      |
| retinol                                                |  | chemical drug                 |  | 0.00727  | NANOG,TGFB2                                             |
| tamibarotene                                           |  | chemical drug                 |  | 0.00983  | CEACAM1,LEPR                                            |
| [Ac-His1,D-Phe2,Lys15,Arg16,Leu27]VIP-(3-7)-GRF-(8-27) |  | chemical reagent              |  | 0.0423   | CREB1                                                   |
| vancomycin                                             |  | biologic drug                 |  | 0.0241   | C4A/C4B,GPX2, TES                                       |
| microcystin                                            |  | chemical toxicant             |  | 0.0143   | CREB1                                                   |
| Phe-Pro-Arg-chloromethyl ketone                        |  | chemical - protease inhibitor |  | 0.0214   | FLT1                                                    |
| N-Ac-leucyl-leucyl-methioninal                         |  | chemical - protease inhibitor |  | 0.0492   | CREB1                                                   |
| TAPI-1                                                 |  | chemical - protease inhibitor |  | 0.00222  | LEPR,MUC5AC                                             |
| androgen                                               |  | chemical drug                 |  | 0.0331   | ALDH6A1,C4A/C4B,CXCR4,WNT5A                             |
| ursolic acid                                           |  | chemical drug                 |  | 0.000912 | CXCR4,MUC5AC,PDCD4,SLC38A2                              |
| monocrotaline                                          |  | chemical toxicant             |  | 0.0334   | FHL1,SMAD5                                              |
| camptothecin                                           |  | chemical drug                 |  | 0.012    | CREB1,FGL2,FLT1,GRB10,MBNL2,PLCL2,PTGER2,TFRC,TLK1,TPM4 |
| tiotropium                                             |  | chemical drug                 |  | 0.0284   | MUC5AC                                                  |
| clofibrate                                             |  | chemical drug                 |  | 0.0345   | CEACAM1,PDCD4,SLCO2A1                                   |

Table H: Upstream Regulators shown in Figure 7

|                                       |  |                                     |  |  |         |                                                 |
|---------------------------------------|--|-------------------------------------|--|--|---------|-------------------------------------------------|
| epinephrine                           |  | chemical - endogenous mammalian     |  |  | 0.0174  | CXCR4,DLK1,TFRC                                 |
| tyrphostin AG 1478                    |  | chemical - kinase inhibitor         |  |  | 0.014   | CXCR4,MUC5AC,PTGER2                             |
| prostanoid                            |  | chemical drug                       |  |  | 0.00718 | ENTPD1                                          |
| P1,P4-Di(adenosine-5') tetraphosphate |  | chemical - endogenous mammalian     |  |  | 0.00139 | TGFB2,THBS1                                     |
| zalcitabine                           |  | chemical drug                       |  |  | 0.0284  | CXCL12                                          |
| gallium nitrate                       |  | chemical drug                       |  |  | 0.0423  | CALCR                                           |
| honokiol                              |  | chemical - endogenous non-mammalian |  |  | 0.0247  | FLT1,IQGAP1                                     |
| melphalan                             |  | chemical drug                       |  |  | 0.00727 | ADAM10,FLT1                                     |
| arginine butyrate                     |  | chemical drug                       |  |  | 0.0214  | UTRN                                            |
| galactose                             |  | chemical - endogenous mammalian     |  |  | 0.0044  | THBS1,VDR                                       |
| D-fructose                            |  | chemical - endogenous mammalian     |  |  | 0.0366  | MLXIPL,THBS1                                    |
| lactose                               |  | chemical - endogenous mammalian     |  |  | 0.0354  | VDR                                             |
| phorbol 12,13-didecanoate             |  | chemical toxicant                   |  |  | 0.0171  | CALCR,HSF2                                      |
| 25-hydroxycholesterol                 |  | chemical reagent                    |  |  | 0.011   | CYP4F2,EIF2S1,VLDLR                             |
| steroid hormone                       |  | chemical - other                    |  |  | 0.0284  | CXCR4                                           |
| dihydrotestosterone                   |  | chemical - endogenous mammalian     |  |  | 0.0407  | C4A/C4B,JAG1,LTBP1,MCAM,PDCD4,TGFB2,THBS1,VLDLR |
| finasteride                           |  | chemical drug                       |  |  | 0.00894 | FLT1,TGFB2                                      |
| arsenite                              |  | chemical toxicant                   |  |  | 0.0429  | SLC38A2,TGFB2,THBS1                             |

**Table J:** Time dependent changes in gene expression in TAC + EVR Group shown in Figure 8

© 2000-2019 QIAGEN. All rights reserved.

| Expr Fold Change | Expr p-value | Expr False Discovery Rate (q-value) | ID          | Flags | Symbol                  | Entrez Gene Name                                   | Location            | Type(s)                 | Drug(s)                                                                |
|------------------|--------------|-------------------------------------|-------------|-------|-------------------------|----------------------------------------------------|---------------------|-------------------------|------------------------------------------------------------------------|
| -1.51            | 0.0215       | 0.921                               | 202852_s_at |       | AAGAB                   | alpha and gamma adaptin binding protein            | Cytoplasm           | other                   |                                                                        |
| 2.06             | 0.0205       | 0.921                               | 217504_at   |       | ABCA6                   | ATP binding cassette subfamily A member 6          | Plasma Membrane     | transporter             |                                                                        |
| 1.64             | 0.0265       | 0.921                               | 204719_at   |       | ABCA8                   | ATP binding cassette subfamily A member 8          | Plasma Membrane     | transporter             |                                                                        |
| 1.66             | 0.0479       | 0.921                               | 218322_s_at |       | ACSL5                   | acyl-CoA synthetase long chain family member 5     | Cytoplasm           | enzyme                  |                                                                        |
| -1.58            | 0.0434       | 0.921                               | 200727_s_at |       | ACTR2                   | ARP2 actin related protein 2 homolog               | Plasma Membrane     | other                   |                                                                        |
| -1.7             | 0.0381       | 0.921                               | 208223_s_at |       | ACVR1B                  | activin A receptor type 1B                         | Plasma Membrane     | kinase                  |                                                                        |
| 1.51             | 0.0179       | 0.921                               | 209765_at   |       | ADAM19                  | ADAM metallopeptidase domain 19                    | Plasma Membrane     | peptidase               |                                                                        |
| 2.63             | 0.0462       | 0.921                               | 203741_s_at |       | ADCY7                   | adenylate cyclase 7                                | Plasma Membrane     | enzyme                  |                                                                        |
| 2.33             | 0.0123       | 0.921                               | 212980_at   |       | AHSA2P                  | activator of HSP90 ATPase homolog 2, pseudogene    | Other               | other                   |                                                                        |
| 1.6              | 0.0188       | 0.921                               | 205583_s_at |       | ALG13                   | ALG13, UDP-N-acetylglucosaminyltransferase subunit | Cytoplasm           | enzyme                  |                                                                        |
| 1.87             | 0.0264       | 0.921                               | 208498_s_at |       | AMY1C (includes others) | amylase, alpha 1C (salivary)                       | Extracellular Space | enzyme                  |                                                                        |
| 1.5              | 0.0132       | 0.921                               | 214723_x_at |       | ANKRD36                 | ankyrin repeat domain 36                           | Other               | other                   |                                                                        |
| 1.54             | 0.0225       | 0.921                               | 204672_s_at |       | ANKRD6                  | ankyrin repeat domain 6                            | Nucleus             | transcription regulator |                                                                        |
| 1.77             | 0.04         | 0.921                               | 201012_at   |       | ANXA1                   | annexin A1                                         | Plasma Membrane     | enzyme                  | hydrocortisone, hydrocortisone/prednisone, hydrocortisone/mitoxantrone |
| -1.61            | 0.0452       | 0.921                               | 222269_at   |       | APOOL                   | apolipoprotein O like                              | Extracellular Space | other                   |                                                                        |
| 1.54             | 0.0491       | 0.921                               | 218067_s_at |       | ARGLU1                  | arginine and glutamate rich 1                      | Other               | other                   |                                                                        |
| -1.64            | 0.00605      | 0.921                               | 211611_s_at |       | ATF6B                   | activating transcription factor 6 beta             | Nucleus             | transcription regulator |                                                                        |
| 2.15             | 0.0436       | 0.921                               | 210538_s_at |       | BIRC3                   | baculoviral IAP repeat containing 3                | Cytoplasm           | enzyme                  | birinapant                                                             |
| 1.61             | 0.02         | 0.921                               | 217179_x_at |       | BMS1P20                 | BMS1, ribosome biogenesis factor pseudogene 20     | Other               | other                   |                                                                        |
| 1.6              | 0.00567      | 0.921                               | 209770_at   |       | BTN3A1                  | butyrophilin subfamily 3 member A1                 | Extracellular Space | other                   |                                                                        |



**Table J:** Time dependent changes in gene expression in TAC + EVR Group shown in Figure 8

|       |         |       |             |   |         |                                                                      |                     |                            |                                                                                                                                                                                                                                                                                   |
|-------|---------|-------|-------------|---|---------|----------------------------------------------------------------------|---------------------|----------------------------|-----------------------------------------------------------------------------------------------------------------------------------------------------------------------------------------------------------------------------------------------------------------------------------|
| 1.7   | 0.0419  | 0.921 | 212613_at   |   | BTN3A2  | butyrophilin subfamily 3 member A2                                   | Plasma Membrane     | other                      |                                                                                                                                                                                                                                                                                   |
| 1.75  | 0.0112  | 0.921 | 204820_s_at |   | BTN3A3  | butyrophilin subfamily 3 member A3                                   | Plasma Membrane     | other                      |                                                                                                                                                                                                                                                                                   |
| 1.55  | 0.0336  | 0.921 | 212077_at   |   | CALD1   | caldesmon 1                                                          | Cytoplasm           | other                      |                                                                                                                                                                                                                                                                                   |
| -1.75 | 0.0415  | 0.921 | 202966_at   |   | CAPN6   | calpain 6                                                            | Cytoplasm           | peptidase                  |                                                                                                                                                                                                                                                                                   |
| 1.96  | 0.0362  | 0.921 | 211368_s_at | D | CASP1   | caspase 1                                                            | Cytoplasm           | peptidase                  | caspase 1 inhibitor                                                                                                                                                                                                                                                               |
| 1.66  | 0.0394  | 0.921 | 211366_x_at | D | CASP1   | caspase 1                                                            | Cytoplasm           | peptidase                  | caspase 1 inhibitor                                                                                                                                                                                                                                                               |
| 4.19  | 0.00111 | 0.921 | 210072_at   |   | CCL19   | C-C motif chemokine ligand 19                                        | Extracellular Space | cytokine                   |                                                                                                                                                                                                                                                                                   |
| 1.6   | 0.0244  | 0.921 | 207794_at   |   | CCR2    | C-C motif chemokine receptor 2                                       | Plasma Membrane     | G-protein coupled receptor | PF-4136309, MLN1202, BMS-813160                                                                                                                                                                                                                                                   |
| 1.86  | 0.0483  | 0.921 | 206991_s_at |   | CCR5    | C-C motif chemokine receptor 5 (gene/pseudogene)                     | Plasma Membrane     | G-protein coupled receptor | maraviroc, vicriviroc, ancriviroc, BMS-813160                                                                                                                                                                                                                                     |
| 1.56  | 0.0451  | 0.921 | 210031_at   |   | CD247   | CD247 molecule                                                       | Plasma Membrane     | transmembrane receptor     | blinatumomab                                                                                                                                                                                                                                                                      |
| 1.58  | 0.046   | 0.921 | 209933_s_at |   | CD300A  | CD300a molecule                                                      | Plasma Membrane     | transmembrane receptor     |                                                                                                                                                                                                                                                                                   |
| 2.44  | 0.0465  | 0.921 | 204118_at   |   | CD48    | CD48 molecule                                                        | Plasma Membrane     | other                      |                                                                                                                                                                                                                                                                                   |
| -1.79 | 0.0238  | 0.921 | 208727_s_at |   | CDC42   | cell division cycle 42                                               | Cytoplasm           | enzyme                     |                                                                                                                                                                                                                                                                                   |
| 2.91  | 0.0457  | 0.921 | 202158_s_at |   | CELF2   | CUGBP Elav-like family member 2                                      | Nucleus             | other                      |                                                                                                                                                                                                                                                                                   |
| 1.53  | 0.0273  | 0.921 | 219644_at   |   | CEP83   | centrosomal protein 83                                               | Extracellular Space | other                      |                                                                                                                                                                                                                                                                                   |
| 2.74  | 0.0274  | 0.921 | 217148_x_at |   | CKAP2   | cytoskeleton associated protein 2                                    | Cytoplasm           | other                      |                                                                                                                                                                                                                                                                                   |
| 1.76  | 0.0398  | 0.921 | 213415_at   |   | CLIC2   | chloride intracellular channel 2                                     | Cytoplasm           | enzyme                     |                                                                                                                                                                                                                                                                                   |
| 1.97  | 0.00953 | 0.921 | 205518_s_at |   | CMAHP   | cytidine monophospho-N-acetylneuraminic acid hydroxylase, pseudogene | Cytoplasm           | other                      |                                                                                                                                                                                                                                                                                   |
| 1.73  | 0.0105  | 0.921 | 211038_s_at |   | CROCCP2 | ciliary rootlet coiled-coil, rootletin pseudogene 2                  | Other               | other                      |                                                                                                                                                                                                                                                                                   |
| 1.9   | 0.0419  | 0.921 | 210140_at   |   | CST7    | cystatin F                                                           | Extracellular Space | other                      |                                                                                                                                                                                                                                                                                   |
| 1.9   | 0.0264  | 0.921 | 209975_at   |   | CYP2E1  | cytochrome P450 family 2 subfamily E member 1                        | Cytoplasm           | enzyme                     |                                                                                                                                                                                                                                                                                   |
| -1.55 | 0.0411  | 0.921 | 215058_at   |   | DENND5B | DENN domain containing 5B                                            | Cytoplasm           | other                      |                                                                                                                                                                                                                                                                                   |
| 1.57  | 0.0228  | 0.921 | 201697_s_at |   | DNMT1   | DNA methyltransferase 1                                              | Nucleus             | enzyme                     | 5-azacytidine/decitabine, 5-azacytidine/cytarabine/decitabine, 5-azacytidine/sorafenib, decitabine/sorafenib, cladribine/cytarabine/decitabine, 4'-thio-2'-deoxycytidine, 5-azacytidine/lenalidomide, fluorocyclopentenylcytosine, decitabine/imatinib, 5-azacytidine, decitabine |
| 2.59  | 0.00651 | 0.921 | 213160_at   |   | DOCK2   | dedicator of cytokinesis 2                                           | Cytoplasm           | other                      |                                                                                                                                                                                                                                                                                   |

**Table J:** Time dependent changes in gene expression in TAC + EVR Group shown in Figure 8

|       |         |       |             |   |                 |                                                         |                     |                            |                                                        |
|-------|---------|-------|-------------|---|-----------------|---------------------------------------------------------|---------------------|----------------------------|--------------------------------------------------------|
| 1.7   | 0.0339  | 0.921 | 205003_at   |   | DOCK4           | dedicator of cytokinesis 4                              | Plasma Membrane     | other                      |                                                        |
| 1.51  | 0.0466  | 0.921 | 212538_at   |   | DOCK9           | dedicator of cytokinesis 9                              | Cytoplasm           | other                      |                                                        |
| 1.67  | 0.00757 | 0.921 | 201843_s_at |   | EFEMP1          | EGF containing fibulin extracellular matrix protein 1   | Extracellular Space | enzyme                     |                                                        |
| 1.58  | 0.00187 | 0.921 | 220349_s_at |   | ENGASE          | endo-beta-N-acetylglucosaminidase                       | Cytoplasm           | enzyme                     |                                                        |
| 1.53  | 0.0463  | 0.921 | 201719_s_at |   | EPB41L2         | erythrocyte membrane protein band 4.1 like 2            | Plasma Membrane     | other                      |                                                        |
| 1.85  | 0.0365  | 0.921 | 211742_s_at |   | EVI2B           | ecotropic viral integration site 2B                     | Plasma Membrane     | other                      |                                                        |
| 3.57  | 0.0045  | 0.921 | 210889_s_at |   | FCGR2B          | Fc fragment of IgG receptor IIb                         | Plasma Membrane     | transmembrane receptor     | IgG, BI-1206, XmAb5871                                 |
| 1.56  | 0.0119  | 0.921 | 221601_s_at |   | FCMR            | Fc fragment of IgM receptor                             | Plasma Membrane     | other                      |                                                        |
| 1.54  | 0.0223  | 0.921 | 205782_at   |   | FGF7            | fibroblast growth factor 7                              | Extracellular Space | growth factor              |                                                        |
| 1.64  | 0.00312 | 0.921 | 212288_at   |   | FNBP1           | formin binding protein 1                                | Nucleus             | enzyme                     |                                                        |
| 1.74  | 0.00749 | 0.921 | 212232_at   |   | FNBP4           | formin binding protein 4                                | Nucleus             | other                      |                                                        |
| 2.12  | 0.042   | 0.921 | 211795_s_at |   | FYB1            | FYN binding protein 1                                   | Nucleus             | other                      |                                                        |
| 1.56  | 0.0217  | 0.921 | 203146_s_at | D | GABBR1          | gamma-aminobutyric acid type B receptor subunit 1       | Plasma Membrane     | G-protein coupled receptor | arbaclofen placarbil, arbaclofen, baclofen, vigabatrin |
| 2.71  | 0.0258  | 0.921 | 205890_s_at | D | GABBR1          | gamma-aminobutyric acid type B receptor subunit 1       | Plasma Membrane     | G-protein coupled receptor | arbaclofen placarbil, arbaclofen, baclofen, vigabatrin |
| 2.57  | 0.0331  | 0.921 | 204222_s_at |   | GLIPR1          | GLI pathogenesis related 1                              | Extracellular Space | other                      |                                                        |
| 2.65  | 0.00692 | 0.921 | 208798_x_at | D | GOLGA8A/GOLGA8B | golgin A8 family member A                               | Cytoplasm           | other                      |                                                        |
| 1.7   | 0.00935 | 0.921 | 210424_s_at | D | GOLGA8A/GOLGA8B | golgin A8 family member A                               | Cytoplasm           | other                      |                                                        |
| 1.77  | 0.0232  | 0.921 | 210425_x_at | D | GOLGA8A/GOLGA8B | golgin A8 family member A                               | Cytoplasm           | other                      |                                                        |
| 1.51  | 0.0077  | 0.921 | 204793_at   |   | GPRASP1         | G protein-coupled receptor associated sorting protein 1 | Cytoplasm           | transporter                |                                                        |
| 3.9   | 0.0347  | 0.921 | 205488_at   |   | GZMA            | granzyme A                                              | Cytoplasm           | peptidase                  |                                                        |
| 3.65  | 0.0201  | 0.921 | 206666_at   |   | GZMK            | granzyme K                                              | Cytoplasm           | peptidase                  |                                                        |
| 2.3   | 0.00698 | 0.921 | 217317_s_at |   | HERC2P2         | hect domain and RLD 2 pseudogene 2                      | Other               | other                      |                                                        |
| -1.51 | 0.00456 | 0.921 | 217427_s_at |   | HIRA            | histone cell cycle regulator                            | Nucleus             | transcription regulator    |                                                        |
| -1.6  | 0.0332  | 0.921 | 201055_s_at |   | HNRNPA0         | heterogeneous nuclear ribonucleoprotein A0              | Nucleus             | other                      |                                                        |
| 1.51  | 0.0279  | 0.921 | 222040_at   |   | HNRNPA1         | heterogeneous nuclear ribonucleoprotein A1              | Nucleus             | enzyme                     |                                                        |
| 2.16  | 0.00814 | 0.921 | 213359_at   |   | HNRNPD          | heterogeneous nuclear ribonucleoprotein D               | Nucleus             | transcription regulator    |                                                        |

**Table J:** Time dependent changes in gene expression in TAC + EVR Group shown in Figure 8

|       |         |       |             |   |         |                                                |                     |                         |                                                                                                                                                                                                                              |
|-------|---------|-------|-------------|---|---------|------------------------------------------------|---------------------|-------------------------|------------------------------------------------------------------------------------------------------------------------------------------------------------------------------------------------------------------------------|
| 1.61  | 0.0374  | 0.921 | 212454_x_at |   | HNRNPDL | heterogeneous nuclear ribonucleoprotein D like | Nucleus             | other                   |                                                                                                                                                                                                                              |
| 1.8   | 0.0166  | 0.921 | 221860_at   |   | HNRNPL  | heterogeneous nuclear ribonucleoprotein L      | Nucleus             | other                   |                                                                                                                                                                                                                              |
| 1.79  | 0.0125  | 0.921 | 213418_at   |   | HSPA6   | heat shock protein family A (Hsp70) member 6   | Nucleus             | enzyme                  |                                                                                                                                                                                                                              |
| 1.77  | 0.0201  | 0.921 | 210029_at   |   | IDO1    | indoleamine 2,3-dioxygenase 1                  | Cytoplasm           | enzyme                  | 1-methyl-D-tryptophan, epacadostat, navaximod, KHK2455, PF-06840003, BMS-986205, LY3381916                                                                                                                                   |
| 2.06  | 0.024   | 0.921 | 208965_s_at |   | IFI16   | interferon gamma inducible protein 16          | Nucleus             | transcription regulator |                                                                                                                                                                                                                              |
| 3.02  | 0.015   | 0.921 | 214059_at   | D | IFI44   | interferon induced protein 44                  | Cytoplasm           | other                   |                                                                                                                                                                                                                              |
| 2.44  | 0.0167  | 0.921 | 214453_s_at | D | IFI44   | interferon induced protein 44                  | Cytoplasm           | other                   |                                                                                                                                                                                                                              |
| -1.65 | 0.0163  | 0.921 | 203628_at   |   | IGF1R   | insulin like growth factor 1 receptor          | Plasma Membrane     | transmembrane receptor  | picropodophyllin, linsitinib, cixutumumab, ganitumab, AVE1642, BMS-754807, XL228, BIIB022, IGF1, dalotuzumab, ceritinib, brigatinib, [I-124]-CPD-1028, MM-141, IGF-methotrexate conjugate, PL225B, KW-2450, IGF-1R inhibitor |
| 11.4  | 0.0456  | 0.921 | 217022_s_at |   | IGHA1   | immunoglobulin heavy constant alpha 1          | Extracellular Space | other                   |                                                                                                                                                                                                                              |
| 3.15  | 0.0276  | 0.921 | 209374_s_at |   | IGHM    | immunoglobulin heavy constant mu               | Plasma Membrane     | transmembrane receptor  |                                                                                                                                                                                                                              |
| 2.96  | 0.029   | 0.921 | 221671_x_at | D | IGKC    | immunoglobulin kappa constant                  | Extracellular Space | other                   |                                                                                                                                                                                                                              |
| 2.9   | 0.0308  | 0.921 | 221651_x_at | D | IGKC    | immunoglobulin kappa constant                  | Extracellular Space | other                   |                                                                                                                                                                                                                              |
| 1.57  | 0.0326  | 0.921 | 211881_x_at | D | IGLJ3   | immunoglobulin lambda joining 3                | Other               | other                   |                                                                                                                                                                                                                              |
| 7.38  | 0.0399  | 0.921 | 209138_x_at | D | IGLJ3   | immunoglobulin lambda joining 3                | Other               | other                   |                                                                                                                                                                                                                              |
| 1.58  | 0.0121  | 0.921 | 209827_s_at |   | IL16    | interleukin 16                                 | Extracellular Space | cytokine                |                                                                                                                                                                                                                              |
| 1.66  | 0.00664 | 0.921 | 222062_at   |   | IL27RA  | interleukin 27 receptor subunit alpha          | Plasma Membrane     | transmembrane receptor  |                                                                                                                                                                                                                              |
| 2.01  | 0.0323  | 0.921 | 209821_at   |   | IL33    | interleukin 33                                 | Extracellular Space | cytokine                |                                                                                                                                                                                                                              |
| 2.26  | 0.0301  | 0.921 | 213817_at   |   | IRAK3   | interleukin 1 receptor associated kinase 3     | Cytoplasm           | kinase                  |                                                                                                                                                                                                                              |
| 1.57  | 0.0455  | 0.921 | 204057_at   |   | IRF8    | interferon regulatory factor 8                 | Nucleus             | transcription regulator |                                                                                                                                                                                                                              |
| 1.63  | 0.0263  | 0.921 | 204698_at   |   | ISG20   | interferon stimulated exonuclease gene 20      | Nucleus             | enzyme                  |                                                                                                                                                                                                                              |
| 1.92  | 0.0443  | 0.921 | 205884_at   |   | ITGA4   | integrin subunit alpha 4                       | Plasma Membrane     | transmembrane receptor  | natalizumab, vedolizumab                                                                                                                                                                                                     |
| 2.02  | 0.0446  | 0.921 | 211339_s_at |   | ITK     | IL2 inducible T cell kinase                    | Cytoplasm           | kinase                  | pazopanib, crizotinib/pazopanib                                                                                                                                                                                              |
| 4.02  | 0.00822 | 0.921 | 212592_at   |   | JCHAIN  | joining chain of multimeric IgA and IgM        | Extracellular Space | other                   |                                                                                                                                                                                                                              |

**Table J:** Time dependent changes in gene expression in TAC + EVR Group shown in Figure 8

|       |         |       |             |              |                                                                            |                 |                         |        |
|-------|---------|-------|-------------|--------------|----------------------------------------------------------------------------|-----------------|-------------------------|--------|
| 1.53  | 0.00554 | 0.921 | 221889_at   | KCTD13       | potassium channel tetramerization domain containing 13                     | Nucleus         | ion channel             |        |
| 1.62  | 0.0428  | 0.921 | 210644_s_at | LAIR1        | leukocyte associated immunoglobulin like receptor 1                        | Plasma Membrane | transmembrane receptor  |        |
| 1.69  | 0.0193  | 0.921 | 208885_at   | LCP1         | lymphocyte cytosolic protein 1                                             | Cytoplasm       | other                   |        |
| 2.13  | 0.00402 | 0.921 | 213703_at   | LINC00342    | long intergenic non-protein coding RNA 342                                 | Other           | other                   |        |
| 1.81  | 0.0177  | 0.921 | 221973_at   | LOC100506076 | uncharacterized LOC100506076                                               | Other           | other                   |        |
| 1.65  | 0.0406  | 0.921 | 209360_s_at | LOC100506403 | uncharacterized LOC100506403                                               | Other           | other                   |        |
| 1.71  | 0.0269  | 0.921 | 214181_x_at | LST1         | leukocyte specific transcript 1                                            | Plasma Membrane | other                   |        |
| -1.94 | 0.0321  | 0.921 | 210596_at   | MAGT1        | magnesium transporter 1                                                    | Plasma Membrane | enzyme                  |        |
| 1.57  | 0.0195  | 0.921 | 214786_at   | MAP3K1       | mitogen-activated protein kinase kinase kinase 1                           | Cytoplasm       | kinase                  | E 6201 |
| 1.84  | 0.0172  | 0.921 | 218181_s_at | MAP4K4       | mitogen-activated protein kinase kinase kinase kinase 4                    | Cytoplasm       | kinase                  |        |
| 2.86  | 0.0194  | 0.921 | 219574_at   | MARCH1       | membrane associated ring-CH-type finger 1                                  | Cytoplasm       | enzyme                  |        |
| -2.55 | 0.0317  | 0.921 | 219730_at   | MED18        | mediator complex subunit 18                                                | Nucleus         | other                   |        |
| 1.56  | 0.0284  | 0.921 | 210794_s_at | MEG3         | maternally expressed 3                                                     | Other           | other                   |        |
| 1.53  | 0.00551 | 0.921 | 212472_at   | MICAL2       | microtubule associated monooxygenase, calponin and LIM domain containing 2 | Cytoplasm       | enzyme                  |        |
| 1.51  | 0.0335  | 0.921 | 205408_at   | MLLT10       | MLLT10, histone lysine methyltransferase DOT1L cofactor                    | Nucleus         | transcription regulator |        |
| 3.34  | 0.0352  | 0.921 | 204959_at   | MNDA         | myeloid cell nuclear differentiation antigen                               | Nucleus         | other                   |        |
| 1.59  | 0.0249  | 0.921 | 221208_s_at | MSANTD2      | Myb/SANT DNA binding domain containing 2                                   | Other           | other                   |        |
| -1.79 | 0.0256  | 0.921 | 214765_s_at | NAAA         | N-acylethanolamine acid amidase                                            | Cytoplasm       | enzyme                  |        |
| 1.64  | 0.02    | 0.921 | 218896_s_at | NCBP3        | nuclear cap binding subunit 3                                              | Nucleus         | other                   |        |
| 1.56  | 0.0283  | 0.921 | 207677_s_at | NCF4         | neutrophil cytosolic factor 4                                              | Cytoplasm       | enzyme                  |        |
| 1.69  | 0.0469  | 0.921 | 209734_at   | NCKAP1L      | NCK associated protein 1 like                                              | Plasma Membrane | other                   |        |

**Table J:** Time dependent changes in gene expression in TAC + EVR Group shown in Figure 8

|       |         |       |             |   |         |                                                   |                     |                            |                                                                                     |
|-------|---------|-------|-------------|---|---------|---------------------------------------------------|---------------------|----------------------------|-------------------------------------------------------------------------------------|
| 1.66  | 0.0436  | 0.921 | 214241_at   |   | NDUFB8  | NADH:ubiquinone oxidoreductase subunit B8         | Cytoplasm           | enzyme                     |                                                                                     |
| 1.73  | 0.0347  | 0.921 | 213915_at   |   | NKG7    | natural killer cell granule protein 7             | Plasma Membrane     | other                      |                                                                                     |
| 3.09  | 0.0348  | 0.921 | 202237_at   |   | NNMT    | nicotinamide N-methyltransferase                  | Cytoplasm           | enzyme                     | atorvastatin/niacin, nicotinic acid/pioglitazone, nicotinic acid, lovastatin/niacin |
| 2.04  | 0.00372 | 0.921 | 212307_s_at |   | OGT     | O-linked N-acetylglucosamine (GlcNAc) transferase | Cytoplasm           | enzyme                     |                                                                                     |
| 1.75  | 0.00649 | 0.921 | 213125_at   |   | OLFML2B | olfactomedin like 2B                              | Extracellular Space | other                      |                                                                                     |
| 1.74  | 0.0264  | 0.921 | 209627_s_at |   | OSBPL3  | oxysterol binding protein like 3                  | Cytoplasm           | transporter                |                                                                                     |
| 1.84  | 0.028   | 0.921 | 220005_at   |   | P2RY13  | purinergic receptor P2Y13                         | Plasma Membrane     | G-protein coupled receptor |                                                                                     |
| 1.59  | 0.0324  | 0.921 | 218543_s_at |   | PARP12  | poly(ADP-ribose) polymerase family member 12      | Nucleus             | other                      |                                                                                     |
| -1.62 | 0.00493 | 0.921 | 204213_at   |   | PIGR    | polymeric immunoglobulin receptor                 | Plasma Membrane     | transporter                |                                                                                     |
| 1.5   | 0.0298  | 0.921 | 203895_at   | D | PLCB4   | phospholipase C beta 4                            | Cytoplasm           | enzyme                     |                                                                                     |
| 1.74  | 0.0336  | 0.921 | 203896_s_at | D | PLCB4   | phospholipase C beta 4                            | Cytoplasm           | enzyme                     |                                                                                     |
| 1.8   | 0.0159  | 0.921 | 213241_at   |   | PLXNC1  | plexin C1                                         | Plasma Membrane     | transmembrane receptor     |                                                                                     |
| 1.72  | 0.0032  | 0.921 | 212176_at   | D | PNISR   | PNN interacting serine and arginine rich protein  | Nucleus             | other                      |                                                                                     |
| 1.76  | 0.0189  | 0.921 | 212179_at   | D | PNISR   | PNN interacting serine and arginine rich protein  | Nucleus             | other                      |                                                                                     |
| 1.83  | 0.0253  | 0.921 | 209598_at   |   | PNMA2   | PNMA family member 2                              | Nucleus             | transporter                |                                                                                     |
| -1.7  | 0.0308  | 0.921 | 209739_s_at |   | PNPLA4  | patatin like phospholipase domain containing 4    | Cytoplasm           | enzyme                     |                                                                                     |
| 1.5   | 0.0138  | 0.921 | 214617_at   |   | PRF1    | perforin 1                                        | Cytoplasm           | transporter                |                                                                                     |
| 1.68  | 0.0385  | 0.921 | 216069_at   |   | PRMT2   | protein arginine methyltransferase 2              | Nucleus             | enzyme                     |                                                                                     |
| 1.51  | 0.0156  | 0.921 | 202127_at   |   | PRPF4B  | pre-mRNA processing factor 4B                     | Nucleus             | kinase                     |                                                                                     |
| -1.63 | 0.00922 | 0.921 | 205171_at   |   | PTPN4   | protein tyrosine phosphatase, non-receptor type 4 | Cytoplasm           | phosphatase                |                                                                                     |
| 2.61  | 0.0225  | 0.921 | 207238_s_at | D | PTPRC   | protein tyrosine phosphatase, receptor type C     | Plasma Membrane     | phosphatase                | 111 In-BC8                                                                          |
| 2.45  | 0.0239  | 0.921 | 212588_at   | D | PTPRC   | protein tyrosine phosphatase, receptor type C     | Plasma Membrane     | phosphatase                | 111 In-BC8                                                                          |

**Table J:** Time dependent changes in gene expression in TAC + EVR Group shown in Figure 8

|       |         |       |             |   |         |                                                       |                     |                         |                                                                             |
|-------|---------|-------|-------------|---|---------|-------------------------------------------------------|---------------------|-------------------------|-----------------------------------------------------------------------------|
| 3.1   | 0.035   | 0.921 | 212587_s_at | D | PTPRC   | protein tyrosine phosphatase, receptor type C         | Plasma Membrane     | phosphatase             | 111 In-BC8                                                                  |
| 2.03  | 0.0423  | 0.921 | 213603_s_at |   | RAC2    | Rac family small GTPase 2                             | Cytoplasm           | enzyme                  |                                                                             |
| 1.51  | 0.0373  | 0.921 | 205647_at   |   | RAD52   | RAD52 homolog, DNA repair protein                     | Nucleus             | other                   |                                                                             |
| 1.57  | 0.00385 | 0.921 | 212033_at   |   | RBM25   | RNA binding motif protein 25                          | Nucleus             | other                   |                                                                             |
| -1.91 | 0.0357  | 0.921 | 213663_s_at |   | RETREG1 | reticulophagy regulator 1                             | Cytoplasm           | other                   |                                                                             |
| 1.75  | 0.0137  | 0.921 | 209007_s_at |   | RSRP1   | arginine and serine rich protein 1                    | Other               | other                   |                                                                             |
| 1.79  | 0.019   | 0.921 | 218793_s_at |   | SCML1   | Scm polycomb group protein like 1                     | Nucleus             | transcription regulator |                                                                             |
| -1.51 | 0.00258 | 0.921 | 215088_s_at |   | SDHC    | succinate dehydrogenase complex subunit C             | Cytoplasm           | enzyme                  |                                                                             |
| -1.54 | 0.0301  | 0.921 | 205405_at   |   | SEMA5A  | semaphorin 5A                                         | Plasma Membrane     | transmembrane receptor  |                                                                             |
| -1.71 | 0.00387 | 0.921 | 213048_s_at |   | SET     | SET nuclear proto-oncogene                            | Nucleus             | phosphatase             |                                                                             |
| 2.24  | 0.0193  | 0.921 | 221768_at   | D | SFPQ    | splicing factor proline and glutamine rich            | Nucleus             | transcription regulator |                                                                             |
| 1.87  | 0.0258  | 0.921 | 214016_s_at | D | SFPQ    | splicing factor proline and glutamine rich            | Nucleus             | transcription regulator |                                                                             |
| 1.55  | 0.00783 | 0.921 | 44673_at    |   | SIGLEC1 | sialic acid binding Ig like lectin 1                  | Plasma Membrane     | other                   |                                                                             |
| 1.76  | 0.0468  | 0.921 | 219159_s_at |   | SLAMF7  | SLAM family member 7                                  | Plasma Membrane     | other                   | elotuzumab                                                                  |
| 1.56  | 0.0378  | 0.921 | 212810_s_at |   | SLC1A4  | solute carrier family 1 member 4                      | Plasma Membrane     | transporter             | riluzole                                                                    |
| -1.77 | 0.0155  | 0.921 | 207429_at   |   | SLC22A2 | solute carrier family 22 member 2                     | Plasma Membrane     | transporter             |                                                                             |
| 2.08  | 0.0432  | 0.921 | 205421_at   |   | SLC22A3 | solute carrier family 22 member 3                     | Plasma Membrane     | transporter             |                                                                             |
| 1.88  | 0.0366  | 0.921 | 221024_s_at |   | SLC2A10 | solute carrier family 2 member 10                     | Plasma Membrane     | transporter             |                                                                             |
| -1.89 | 0.0443  | 0.921 | 202667_s_at |   | SLC39A7 | solute carrier family 39 member 7                     | Plasma Membrane     | transporter             |                                                                             |
| 1.94  | 0.0164  | 0.921 | 200795_at   |   | SPARCL1 | SPARC like 1                                          | Extracellular Space | other                   |                                                                             |
| -1.52 | 0.0331  | 0.921 | 203128_at   |   | SPTLC2  | serine palmitoyltransferase long chain base subunit 2 | Cytoplasm           | enzyme                  |                                                                             |
| -1.54 | 0.0262  | 0.921 | 208991_at   |   | STAT3   | signal transducer and activator of transcription 3    | Nucleus             | transcription regulator | golotimod, OPB-31121, OPB-51602, STAT3 inhibitor XIII, danvatirsen, TTI-101 |
| 1.73  | 0.0151  | 0.921 | 206118_at   |   | STAT4   | signal transducer and activator of transcription 4    | Nucleus             | transcription regulator |                                                                             |
| -1.51 | 0.048   | 0.921 | 209622_at   |   | STK16   | serine/threonine kinase 16                            | Cytoplasm           | kinase                  |                                                                             |
| 1.86  | 0.024   | 0.921 | 212344_at   | D | SULF1   | sulfatase 1                                           | Cytoplasm           | enzyme                  |                                                                             |

**Table J:** Time dependent changes in gene expression in TAC + EVR Group shown in Figure 8

|       |         |       |             |   |                          |                                                                  |                     |                         |  |
|-------|---------|-------|-------------|---|--------------------------|------------------------------------------------------------------|---------------------|-------------------------|--|
| 1.53  | 0.0298  | 0.921 | 212354_at   | D | SULF1                    | sulfatase 1                                                      | Cytoplasm           | enzyme                  |  |
| 1.73  | 0.0458  | 0.921 | 212353_at   | D | SULF1                    | sulfatase 1                                                      | Cytoplasm           | enzyme                  |  |
| 1.65  | 0.0323  | 0.921 | 219310_at   |   | SYNDIG1                  | synapse differentiation inducing 1                               | Plasma Membrane     | other                   |  |
| 2.18  | 0.0107  | 0.921 | 219563_at   |   | SYNE3                    | spectrin repeat containing nuclear envelope family member 3      | Nucleus             | other                   |  |
| 1.86  | 0.0188  | 0.921 | 209403_at   |   | TBC1D3 (includes others) | TBC1 domain family member 3F                                     | Extracellular Space | other                   |  |
| 1.54  | 0.00781 | 0.921 | 201108_s_at |   | THBS1                    | thrombospondin 1                                                 | Extracellular Space | other                   |  |
| 1.7   | 0.0342  | 0.921 | 207571_x_at |   | THEMIS2                  | thymocyte selection associated family member 2                   | Other               | other                   |  |
| 1.72  | 0.00785 | 0.921 | 201448_at   |   | TIA1                     | TIA1 cytotoxic granule associated RNA binding protein            | Nucleus             | other                   |  |
| 1.6   | 0.023   | 0.921 | 210176_at   |   | TLR1                     | toll like receptor 1                                             | Plasma Membrane     | transmembrane receptor  |  |
| 1.53  | 0.0106  | 0.921 | 202643_s_at |   | TNFAIP3                  | TNF alpha induced protein 3                                      | Nucleus             | enzyme                  |  |
| 1.81  | 0.04    | 0.921 | 203508_at   |   | TNFRSF1B                 | TNF receptor superfamily member 1B                               | Plasma Membrane     | transmembrane receptor  |  |
| 1.6   | 0.0359  | 0.921 | 219423_x_at |   | TNFRSF25                 | TNF receptor superfamily member 25                               | Plasma Membrane     | transmembrane receptor  |  |
| 1.51  | 0.0486  | 0.921 | 208609_s_at |   | TNXB                     | tenascin XB                                                      | Extracellular Space | other                   |  |
| 2.13  | 0.0189  | 0.921 | 213193_x_at | D | TRBC1                    | T cell receptor beta constant 1                                  | Plasma Membrane     | other                   |  |
| 2.69  | 0.0268  | 0.921 | 210915_x_at | D | TRBC1                    | T cell receptor beta constant 1                                  | Plasma Membrane     | other                   |  |
| 1.87  | 0.0116  | 0.921 | 213293_s_at |   | TRIM22                   | tripartite motif containing 22                                   | Cytoplasm           | transcription regulator |  |
| -1.62 | 0.0479  | 0.921 | 208589_at   |   | TRPC7                    | transient receptor potential cation channel subfamily C member 7 | Plasma Membrane     | ion channel             |  |
| 1.64  | 0.00168 | 0.921 | 213510_x_at |   | USP32P2                  | ubiquitin specific peptidase 32 pseudogene 2                     | Other               | other                   |  |
| 1.52  | 0.0471  | 0.921 | 221213_s_at |   | ZNF280D                  | zinc finger protein 280D                                         | Other               | other                   |  |
| 1.83  | 0.0115  | 0.921 | 215985_at   |   | ZNRD1ASP                 | zinc ribbon domain containing 1 antisense, pseudogene            | Other               | other                   |  |

**Table K:** Time dependent changes in gene expression in TAC + MMF Group shown in Figure 8

© 2000-2019 QIAGEN. All rights reserved.

| Expr Fold Change | Expr p-value | Expr False Discovery Rate (q-value) | ID          | Flags | Symbol   | Entrez Gene Name                          | Location        | Type(s)                    | Drug(s)                                                                                                                                                                                                                                                                                                                                                                                                                                                                                                                                                                                                                                                                                                                                                                                                                                                                                                                                                                                                                                                                                                                                                                                                                                                                                                                                                                                                                                                                                                                                                                                                                                                |
|------------------|--------------|-------------------------------------|-------------|-------|----------|-------------------------------------------|-----------------|----------------------------|--------------------------------------------------------------------------------------------------------------------------------------------------------------------------------------------------------------------------------------------------------------------------------------------------------------------------------------------------------------------------------------------------------------------------------------------------------------------------------------------------------------------------------------------------------------------------------------------------------------------------------------------------------------------------------------------------------------------------------------------------------------------------------------------------------------------------------------------------------------------------------------------------------------------------------------------------------------------------------------------------------------------------------------------------------------------------------------------------------------------------------------------------------------------------------------------------------------------------------------------------------------------------------------------------------------------------------------------------------------------------------------------------------------------------------------------------------------------------------------------------------------------------------------------------------------------------------------------------------------------------------------------------------|
| 1.53             | 0.0218       | 0.199                               | 208561_at   |       | ABCC9    | ATP binding cassette subfamily C member 9 | Plasma Membrane | ion channel                |                                                                                                                                                                                                                                                                                                                                                                                                                                                                                                                                                                                                                                                                                                                                                                                                                                                                                                                                                                                                                                                                                                                                                                                                                                                                                                                                                                                                                                                                                                                                                                                                                                                        |
| -1.69            | 0.0417       | 0.244                               | 45288_at    |       | ABHD6    | abhydrolase domain containing 6           | Cytoplasm       | enzyme                     |                                                                                                                                                                                                                                                                                                                                                                                                                                                                                                                                                                                                                                                                                                                                                                                                                                                                                                                                                                                                                                                                                                                                                                                                                                                                                                                                                                                                                                                                                                                                                                                                                                                        |
| -2.12            | 0.0396       | 0.24                                | 205730_s_at |       | ABLIM3   | actin binding LIM protein family member 3 | Cytoplasm       | other                      |                                                                                                                                                                                                                                                                                                                                                                                                                                                                                                                                                                                                                                                                                                                                                                                                                                                                                                                                                                                                                                                                                                                                                                                                                                                                                                                                                                                                                                                                                                                                                                                                                                                        |
| -1.59            | 0.0433       | 0.249                               | 207071_s_at |       | ACO1     | aconitase 1                               | Cytoplasm       | enzyme                     |                                                                                                                                                                                                                                                                                                                                                                                                                                                                                                                                                                                                                                                                                                                                                                                                                                                                                                                                                                                                                                                                                                                                                                                                                                                                                                                                                                                                                                                                                                                                                                                                                                                        |
| -3.36            | 0.0188       | 0.191                               | 204638_at   |       | ACP5     | acid phosphatase 5, tartrate resistant    | Cytoplasm       | phosphatase                |                                                                                                                                                                                                                                                                                                                                                                                                                                                                                                                                                                                                                                                                                                                                                                                                                                                                                                                                                                                                                                                                                                                                                                                                                                                                                                                                                                                                                                                                                                                                                                                                                                                        |
| 2.32             | 0.00368      | 0.133                               | 214895_s_at | D     | ADAM10   | ADAM metalloproteinase domain 10          | Plasma Membrane | peptidase                  |                                                                                                                                                                                                                                                                                                                                                                                                                                                                                                                                                                                                                                                                                                                                                                                                                                                                                                                                                                                                                                                                                                                                                                                                                                                                                                                                                                                                                                                                                                                                                                                                                                                        |
| 1.87             | 0.0111       | 0.166                               | 202604_x_at | D     | ADAM10   | ADAM metalloproteinase domain 10          | Plasma Membrane | peptidase                  |                                                                                                                                                                                                                                                                                                                                                                                                                                                                                                                                                                                                                                                                                                                                                                                                                                                                                                                                                                                                                                                                                                                                                                                                                                                                                                                                                                                                                                                                                                                                                                                                                                                        |
| 1.51             | 0.0127       | 0.171                               | 213974_at   |       | ADAMTSL3 | ADAMTS like 3                             | Other           | other                      |                                                                                                                                                                                                                                                                                                                                                                                                                                                                                                                                                                                                                                                                                                                                                                                                                                                                                                                                                                                                                                                                                                                                                                                                                                                                                                                                                                                                                                                                                                                                                                                                                                                        |
| 1.69             | 0.0044       | 0.137                               | 203865_s_at |       | ADARB1   | adenosine deaminase, RNA specific B1      | Nucleus         | enzyme                     |                                                                                                                                                                                                                                                                                                                                                                                                                                                                                                                                                                                                                                                                                                                                                                                                                                                                                                                                                                                                                                                                                                                                                                                                                                                                                                                                                                                                                                                                                                                                                                                                                                                        |
| 2.16             | 0.0244       | 0.206                               | 209867_s_at |       | ADGRL3   | adhesion G protein-coupled receptor L3    | Plasma Membrane | G-protein coupled receptor |                                                                                                                                                                                                                                                                                                                                                                                                                                                                                                                                                                                                                                                                                                                                                                                                                                                                                                                                                                                                                                                                                                                                                                                                                                                                                                                                                                                                                                                                                                                                                                                                                                                        |
| 1.78             | 0.0315       | 0.223                               | 203571_s_at |       | ADIRF    | adipogenesis regulatory factor            | Nucleus         | other                      |                                                                                                                                                                                                                                                                                                                                                                                                                                                                                                                                                                                                                                                                                                                                                                                                                                                                                                                                                                                                                                                                                                                                                                                                                                                                                                                                                                                                                                                                                                                                                                                                                                                        |
| 1.66             | 0.0123       | 0.17                                | 209869_at   |       | ADRA2A   | adrenoceptor alpha 2A                     | Plasma Membrane | G-protein coupled receptor | paliperidone, risperidone, antazoline/naphazoline, acetaminophen/clemastine/pseudoephedrine, articaine/epinephrine, bupivacaine/epinephrine, caffeine/ergotamine, acetaminophen/dexbrompheniramine/pseudoephedrine, dapiprazole, dexbrompheniramine/pseudoephedrine, chlorpheniramine/ibuprofen/pseudoephedrine, dipivefrin, cetirizine/pseudoephedrine, asenapine, epinephrine/prilocaine, epinephrine/lidocaine, myogane, V2006, lurasidone, lofexidine, dextromethorphan/quinidine, hydrocodone/pseudoephedrine, paliperidone palmitate, xylometazoline, brimonidine/brinzolamide, epinephrine/methotrexate, fexofenadine/pseudoephedrine, loratadine/pseudoephedrine, oxymetazoline, prazosin, methamphetamine, phenylpropanolamine, ephedrine, tolazoline, guanfacine, guanabenz, guanethidine, phenoxybenzamine, dexmedetomidine, ibuprofen/pseudoephedrine, brimonidine, clonidine, cirazoline, dexefaroxan, quinidine, polythiazide/prazosin, chlorothiazide/methyl dopa, chlorthalidone/clonidine, propafenone, guanadrel, hydrochlorothiazide/methyl dopa, naproxen/pseudoephedrine, pericizazine, metamaminol, tizanidine, quetiapine, D-pseudoephedrine, apraclonidine, benzphetamine, mirtazapine, venlafaxine, phentolamine, labetalol, mephentermine, propylhexedrine, yohimbine, dihydroergotamine, ergotamine, norepinephrine, alpha-methyl dopa, epinephrine, droxidopa, dopamine, chlorpheniramine/phenylpropanolamine, desloratadine/pseudoephedrine, acrivastine/pseudoephedrine, carbinoxamine/pseudoephedrine, brompheniramine/codeine/phenylpropanolamine, pseudoephedrine/triprolidine, codeine/pseudoephedrine/triprolidine, |



**Table K:** Time dependent changes in gene expression in TAC + MMF Group shown in Figure 8

|       |          |       |             |   |          |                                                           |                     |                         |  |
|-------|----------|-------|-------------|---|----------|-----------------------------------------------------------|---------------------|-------------------------|--|
| 1.73  | 0.00211  | 0.121 | 209535_s_at |   | AKAP13   | A-kinase anchoring protein 13                             | Cytoplasm           | other                   |  |
| -1.59 | 0.0206   | 0.197 | 214259_s_at |   | AKR7A2   | aldo-keto reductase family 7 member A2                    | Cytoplasm           | enzyme                  |  |
| -2.28 | 0.0474   | 0.258 | 211552_s_at |   | ALDH4A1  | aldehyde dehydrogenase 4 family member A1                 | Cytoplasm           | enzyme                  |  |
| -1.51 | 0.036    | 0.232 | 208950_s_at |   | ALDH7A1  | aldehyde dehydrogenase 7 family member A1                 | Cytoplasm           | enzyme                  |  |
| -1.72 | 0.00548  | 0.143 | 220365_at   |   | ALLC     | allantoicase                                              | Other               | enzyme                  |  |
| -1.52 | 0.0172   | 0.187 | 214707_x_at |   | ALMS1    | ALMS1, centrosome and basal body associated protein       | Cytoplasm           | other                   |  |
| 1.56  | 0.00162  | 0.119 | 219868_s_at |   | ANKFY1   | ankyrin repeat and FYVE domain containing 1               | Cytoplasm           | transcription regulator |  |
| 1.91  | 0.0275   | 0.213 | 204671_s_at | D | ANKRD6   | ankyrin repeat domain 6                                   | Nucleus             | transcription regulator |  |
| 1.72  | 0.0321   | 0.224 | 204672_s_at | D | ANKRD6   | ankyrin repeat domain 6                                   | Nucleus             | transcription regulator |  |
| 1.64  | 0.0121   | 0.169 | 208103_s_at |   | ANP32E   | acidic nuclear phosphoprotein 32 family member E          | Nucleus             | other                   |  |
| 1.53  | 0.043    | 0.248 | 210278_s_at |   | AP4S1    | adaptor related protein complex 4 subunit sigma 1         | Cytoplasm           | other                   |  |
| 1.56  | 0.0155   | 0.181 | 214995_s_at |   | APOBEC3G | apolipoprotein B mRNA editing enzyme catalytic subunit 3G | Nucleus             | enzyme                  |  |
| -1.85 | 0.022    | 0.2   | 213553_x_at |   | APOC1    | apolipoprotein C1                                         | Extracellular Space | transporter             |  |
| -2.26 | 0.0359   | 0.232 | 212884_x_at | D | APOE     | apolipoprotein E                                          | Extracellular Space | transporter             |  |
| -2.49 | 0.0442   | 0.251 | 212883_at   | D | APOE     | apolipoprotein E                                          | Extracellular Space | transporter             |  |
| 1.51  | 0.0388   | 0.238 | 209546_s_at |   | APOL1    | apolipoprotein L1                                         | Extracellular Space | transporter             |  |
| 2.05  | 0.000499 | 0.103 | 213618_at   |   | ARAP2    | ArfGAP with RhoGAP domain, ankyrin repeat and PH domain 2 | Cytoplasm           | other                   |  |
| 1.86  | 0.0277   | 0.213 | 205414_s_at |   | ARHGAP44 | Rho GTPase activating protein 44                          | Cytoplasm           | other                   |  |
| 1.58  | 0.0143   | 0.175 | 210971_s_at |   | ARNTL    | aryl hydrocarbon receptor nuclear translocator like       | Nucleus             | transcription regulator |  |
| 1.58  | 0.0131   | 0.172 | 205808_at   |   | ASPH     | aspartate beta-hydroxylase                                | Cytoplasm           | enzyme                  |  |
| 1.99  | 0.000431 | 0.103 | 205446_s_at |   | ATF2     | activating transcription factor 2                         | Nucleus             | transcription regulator |  |
| -1.52 | 0.000552 | 0.103 | 217550_at   |   | ATF6     | activating transcription factor 6                         | Cytoplasm           | transcription regulator |  |

**Table K:** Time dependent changes in gene expression in TAC + MMF Group shown in Figure 8

|       |          |        |             |            |                                                                       |                     |                            |            |
|-------|----------|--------|-------------|------------|-----------------------------------------------------------------------|---------------------|----------------------------|------------|
| -1.58 | 0.000026 | 0.0655 | 214149_s_at | ATP6V0E1   | ATPase H+ transporting V0 subunit e1                                  | Cytoplasm           | transporter                |            |
| -1.55 | 0.0141   | 0.175  | 214762_at   | ATP6V1G2   | ATPase H+ transporting V1 subunit G2                                  | Cytoplasm           | transporter                |            |
| 1.54  | 0.00628  | 0.148  | 220416_at   | ATP8B4     | ATPase phospholipid transporting 8B4 (putative)                       | Plasma Membrane     | transporter                |            |
| 2.4   | 0.0141   | 0.175  | 213745_at   | ATRNL1     | attractin like 1                                                      | Other               | other                      |            |
| 1.73  | 0.000072 | 0.0723 | 211022_s_at | ATRX       | ATRX, chromatin remodeler                                             | Nucleus             | transcription regulator    |            |
| 2.01  | 0.00498  | 0.14   | 211812_s_at | D B3GALNT1 | beta-1,3-N-acetylgalactosaminyltransferase 1 (globoside blood group)  | Cytoplasm           | enzyme                     |            |
| 1.56  | 0.0456   | 0.254  | 211379_x_at | D B3GALNT1 | beta-1,3-N-acetylgalactosaminyltransferase 1 (globoside blood group)  | Cytoplasm           | enzyme                     |            |
| 1.76  | 0.0104   | 0.162  | 219326_s_at | B3GNT2     | UDP-GlcNAc:betaGal beta-1,3-N-acetylglucosaminyltransferase 2         | Cytoplasm           | enzyme                     |            |
| 1.85  | 0.0392   | 0.239  | 206233_at   | B4GALT6    | beta-1,4-galactosyltransferase 6                                      | Cytoplasm           | enzyme                     |            |
| 2.3   | 0.00843  | 0.157  | 219528_s_at | BCL11B     | B cell CLL/lymphoma 11B                                               | Nucleus             | transcription regulator    |            |
| 1.61  | 0.031    | 0.221  | 203140_at   | BCL6       | B cell CLL/lymphoma 6                                                 | Nucleus             | transcription regulator    |            |
| 1.56  | 0.0182   | 0.189  | 213208_at   | BICRAL     | BRD4 interacting chromatin remodeling complex associated protein like | Nucleus             | other                      |            |
| 1.67  | 0.0251   | 0.208  | 210538_s_at | BIRC3      | baculoviral IAP repeat containing 3                                   | Cytoplasm           | enzyme                     | birinapant |
| 1.61  | 0.0378   | 0.236  | 207326_at   | BTC        | betacellulin                                                          | Extracellular Space | growth factor              |            |
| -1.6  | 0.0288   | 0.215  | 214116_at   | BTD        | biotinidase                                                           | Extracellular Space | enzyme                     |            |
| 1.52  | 0.00814  | 0.155  | 200921_s_at | BTG1       | BTG anti-proliferation factor 1                                       | Nucleus             | transcription regulator    |            |
| 1.57  | 0.00486  | 0.139  | 218983_at   | C1RL       | complement C1r subcomponent like                                      | Extracellular Space | peptidase                  |            |
| 1.63  | 0.00456  | 0.137  | 213875_x_at | C6orf62    | chromosome 6 open reading frame 62                                    | Other               | other                      |            |
| 2     | 0.000569 | 0.103  | 210815_s_at | CALCRL     | calcitonin receptor like receptor                                     | Plasma Membrane     | G-protein coupled receptor |            |
| -1.61 | 0.00295  | 0.124  | 214316_x_at | CALR       | calreticulin                                                          | Cytoplasm           | transcription regulator    |            |
| 1.5   | 0.00083  | 0.106  | 208853_s_at | CANX       | calnexin                                                              | Cytoplasm           | other                      |            |

**Table K:** Time dependent changes in gene expression in TAC + MMF Group shown in Figure 8

|        |          |       |             |   |          |                                                                                 |                     |                            |                                 |
|--------|----------|-------|-------------|---|----------|---------------------------------------------------------------------------------|---------------------|----------------------------|---------------------------------|
| 1.56   | 0.0192   | 0.192 | 203357_s_at |   | CAPN7    | calpain 7                                                                       | Cytoplasm           | peptidase                  |                                 |
| 1.94   | 0.00953  | 0.16  | 207620_s_at |   | CASK     | calcium/calmodulin dependent serine protein kinase                              | Plasma Membrane     | kinase                     |                                 |
| 1.65   | 0.000857 | 0.106 | 218711_s_at |   | CAVIN2   | caveolae associated protein 2                                                   | Plasma Membrane     | other                      |                                 |
| 1.52   | 0.00842  | 0.156 | 206724_at   |   | CBX4     | chromobox 4                                                                     | Nucleus             | transcription regulator    |                                 |
| 1.54   | 0.0109   | 0.165 | 212886_at   |   | CCDC69   | coiled-coil domain containing 69                                                | Other               | other                      |                                 |
| 3.08   | 0.0206   | 0.197 | 204655_at   | D | CCL5     | C-C motif chemokine ligand 5                                                    | Extracellular Space | cytokine                   |                                 |
| 3.3    | 0.0324   | 0.225 | 1405_i_at   | D | CCL5     | C-C motif chemokine ligand 5                                                    | Extracellular Space | cytokine                   |                                 |
| 1.73   | 0.00135  | 0.114 | 211559_s_at |   | CCNG2    | cyclin G2                                                                       | Nucleus             | other                      |                                 |
| 2.43   | 0.0103   | 0.162 | 206978_at   |   | CCR2     | C-C motif chemokine receptor 2                                                  | Plasma Membrane     | G-protein coupled receptor | PF-4136309, MLN1202, BMS-813160 |
| 2.21   | 0.0119   | 0.168 | 205987_at   |   | CD1C     | CD1c molecule                                                                   | Plasma Membrane     | other                      |                                 |
| 2.64   | 0.01     | 0.161 | 215784_at   |   | CD1E     | CD1e molecule                                                                   | Cytoplasm           | other                      |                                 |
| 2.08   | 0.032    | 0.224 | 205831_at   |   | CD2      | CD2 molecule                                                                    | Plasma Membrane     | transmembrane receptor     | alefacept, siplizumab           |
| 1.86   | 0.0354   | 0.231 | 210031_at   |   | CD247    | CD247 molecule                                                                  | Plasma Membrane     | transmembrane receptor     | blinatumomab                    |
| 1.87   | 0.0333   | 0.227 | 206150_at   |   | CD27     | CD27 molecule                                                                   | Plasma Membrane     | transmembrane receptor     | CDX-1127                        |
| 1.6    | 0.0488   | 0.261 | 206804_at   |   | CD3G     | CD3g molecule                                                                   | Plasma Membrane     | transmembrane receptor     | blinatumomab                    |
| 2.91   | 0.0225   | 0.202 | 209795_at   |   | CD69     | CD69 molecule                                                                   | Plasma Membrane     | transmembrane receptor     |                                 |
| -1.5   | 0.0178   | 0.188 | 215296_at   |   | CDC42BPA | CDC42 binding protein kinase alpha                                              | Cytoplasm           | kinase                     |                                 |
| 1.53   | 0.0394   | 0.239 | 204677_at   |   | CDH5     | cadherin 5                                                                      | Plasma Membrane     | other                      |                                 |
| 1.51   | 0.00117  | 0.109 | 206474_at   |   | CDK17    | cyclin dependent kinase 17                                                      | Cytoplasm           | kinase                     |                                 |
| -10.92 | 0.0136   | 0.174 | 209395_at   | D | CHI3L1   | chitinase 3 like 1                                                              | Extracellular Space | enzyme                     |                                 |
| -9.13  | 0.0185   | 0.19  | 209396_s_at | D | CHI3L1   | chitinase 3 like 1                                                              | Extracellular Space | enzyme                     |                                 |
| -5.16  | 0.0264   | 0.211 | 208168_s_at |   | CHIT1    | chitinase 1                                                                     | Extracellular Space | enzyme                     |                                 |
| 1.5    | 0.00741  | 0.15  | 207099_s_at |   | CHM      | CHM, Rab escort protein 1                                                       | Cytoplasm           | enzyme                     |                                 |
| 1.95   | 0.0207   | 0.197 | 211419_s_at |   | CHN2     | chimerin 2                                                                      | Cytoplasm           | other                      |                                 |
| -1.76  | 0.0258   | 0.21  | 207993_s_at |   | CHP1     | calcineurin like EF-hand protein 1                                              | Cytoplasm           | transporter                |                                 |
| 1.64   | 0.0326   | 0.225 | 212801_at   |   | CIT      | citron rho-interacting serine/threonine kinase                                  | Cytoplasm           | kinase                     |                                 |
| 1.92   | 0.00256  | 0.122 | 207980_s_at |   | CITED2   | Cbp/p300 interacting transactivator with Glu/Asp rich carboxy-terminal domain 2 | Nucleus             | transcription regulator    |                                 |
| 1.51   | 0.0325   | 0.225 | 204482_at   |   | CLDN5    | claudin 5                                                                       | Plasma Membrane     | other                      |                                 |

**Table K:** Time dependent changes in gene expression in TAC + MMF Group shown in Figure 8

|       |         |       |             |   |         |                                                |                     |                            |                                                                                                                                                                                 |
|-------|---------|-------|-------------|---|---------|------------------------------------------------|---------------------|----------------------------|---------------------------------------------------------------------------------------------------------------------------------------------------------------------------------|
| 1.76  | 0.00736 | 0.15  | 201559_s_at | D | CLIC4   | chloride intracellular channel 4               | Plasma Membrane     | ion channel                |                                                                                                                                                                                 |
| 1.51  | 0.0204  | 0.196 | 221881_s_at | D | CLIC4   | chloride intracellular channel 4               | Plasma Membrane     | ion channel                |                                                                                                                                                                                 |
| 1.69  | 0.00288 | 0.124 | 211981_at   |   | COL4A1  | collagen type IV alpha 1 chain                 | Extracellular Space | other                      | collagenase clostridium histolyticum                                                                                                                                            |
| -1.54 | 0.00562 | 0.143 | 205509_at   |   | CPB1    | carboxypeptidase B1                            | Extracellular Space | peptidase                  |                                                                                                                                                                                 |
| 1.7   | 0.0213  | 0.198 | 201942_s_at |   | CPD     | carboxypeptidase D                             | Extracellular Space | peptidase                  |                                                                                                                                                                                 |
| -1.64 | 0.0159  | 0.183 | 215700_x_at |   | CPNE6   | copine 6                                       | Plasma Membrane     | transporter                |                                                                                                                                                                                 |
| 1.79  | 0.0224  | 0.201 | 202978_s_at |   | CREBZF  | CREB/ATF bZIP transcription factor             | Nucleus             | transcription regulator    |                                                                                                                                                                                 |
| -1.66 | 0.0131  | 0.172 | 213275_x_at |   | CTSB    | cathepsin B                                    | Cytoplasm           | peptidase                  |                                                                                                                                                                                 |
| 1.55  | 0.00512 | 0.141 | 210257_x_at | D | CUL4B   | cullin 4B                                      | Nucleus             | other                      |                                                                                                                                                                                 |
| 1.51  | 0.0102  | 0.162 | 215997_s_at | D | CUL4B   | cullin 4B                                      | Nucleus             | other                      |                                                                                                                                                                                 |
| 2.21  | 0.00268 | 0.122 | 209687_at   |   | CXCL12  | C-X-C motif chemokine ligand 12                | Extracellular Space | cytokine                   | NOX-A12                                                                                                                                                                         |
| 2.04  | 0.0349  | 0.229 | 211919_s_at | D | CXCR4   | C-X-C motif chemokine receptor 4               | Plasma Membrane     | G-protein coupled receptor | AMD 11070, ulocuplumab, cladribine/cytarabine/filgrastim/idarubicin/plerixafor, POL6326, BL-8040, LY-2510924, burixafor, USL311, PF-06747143, plerixafor, filgrastim/plerixafor |
| 1.96  | 0.043   | 0.249 | 209201_x_at | D | CXCR4   | C-X-C motif chemokine receptor 4               | Plasma Membrane     | G-protein coupled receptor | AMD 11070, ulocuplumab, cladribine/cytarabine/filgrastim/idarubicin/plerixafor, POL6326, BL-8040, LY-2510924, burixafor, USL311, PF-06747143, plerixafor, filgrastim/plerixafor |
| 1.93  | 0.00108 | 0.106 | 202435_s_at | D | CYP1B1  | cytochrome P450 family 1 subfamily B member 1  | Cytoplasm           | enzyme                     |                                                                                                                                                                                 |
| 1.65  | 0.00154 | 0.119 | 202437_s_at | D | CYP1B1  | cytochrome P450 family 1 subfamily B member 1  | Cytoplasm           | enzyme                     |                                                                                                                                                                                 |
| 1.65  | 0.00532 | 0.142 | 202436_s_at | D | CYP1B1  | cytochrome P450 family 1 subfamily B member 1  | Cytoplasm           | enzyme                     |                                                                                                                                                                                 |
| -1.57 | 0.0265  | 0.211 | 203979_at   |   | CYP27A1 | cytochrome P450 family 27 subfamily A member 1 | Cytoplasm           | enzyme                     |                                                                                                                                                                                 |
| -3.98 | 0.0384  | 0.238 | 205676_at   |   | CYP27B1 | cytochrome P450 family 27 subfamily B member 1 | Cytoplasm           | enzyme                     |                                                                                                                                                                                 |
| -1.78 | 0.038   | 0.237 | 205939_at   |   | CYP3A7  | cytochrome P450 family 3 subfamily A member 7  | Cytoplasm           | enzyme                     | cobicistat, cobicistat/elvitegravir/emtricitabine/tenofovir disoproxil, atazanavir/cobicistat, cobicistat/darunavir                                                             |
| -1.7  | 0.0316  | 0.223 | 220331_at   |   | CYP46A1 | cytochrome P450 family 46 subfamily A member 1 | Cytoplasm           | enzyme                     |                                                                                                                                                                                 |
| -1.71 | 0.0152  | 0.18  | 206153_at   |   | CYP4F11 | cytochrome P450 family 4 subfamily F member 11 | Cytoplasm           | enzyme                     |                                                                                                                                                                                 |

**Table K:** Time dependent changes in gene expression in TAC + MMF Group shown in Figure 8

|       |         |       |             |   |          |                                                       |                 |                         |                                                                                                                                                                            |
|-------|---------|-------|-------------|---|----------|-------------------------------------------------------|-----------------|-------------------------|----------------------------------------------------------------------------------------------------------------------------------------------------------------------------|
| -8.6  | 0.0283  | 0.214 | 210452_x_at |   | CYP4F2   | cytochrome P450 family 4 subfamily F member 2         | Cytoplasm       | enzyme                  |                                                                                                                                                                            |
| -5.53 | 0.0251  | 0.208 | 206514_s_at |   | CYP4F3   | cytochrome P450 family 4 subfamily F member 3         | Cytoplasm       | enzyme                  |                                                                                                                                                                            |
| 1.7   | 0.00324 | 0.128 | 212853_at   | D | DCUN1D4  | defective in cullin neddylation 1 domain containing 4 | Nucleus         | other                   |                                                                                                                                                                            |
| 1.52  | 0.0176  | 0.188 | 212851_at   | D | DCUN1D4  | defective in cullin neddylation 1 domain containing 4 | Nucleus         | other                   |                                                                                                                                                                            |
| -1.54 | 0.0434  | 0.249 | 213998_s_at |   | DDX17    | DEAD-box helicase 17                                  | Nucleus         | enzyme                  |                                                                                                                                                                            |
| 1.91  | 0.0271  | 0.212 | 53991_at    |   | DENND2A  | DENN domain containing 2A                             | Cytoplasm       | other                   |                                                                                                                                                                            |
| 1.65  | 0.0286  | 0.215 | 221081_s_at |   | DENND2D  | DENN domain containing 2D                             | Cytoplasm       | other                   |                                                                                                                                                                            |
| -1.78 | 0.00444 | 0.137 | 215058_at   |   | DENND5B  | DENN domain containing 5B                             | Cytoplasm       | other                   |                                                                                                                                                                            |
| -1.5  | 0.0402  | 0.241 | 212504_at   |   | DIP2C    | disco interacting protein 2 homolog C                 | Other           | other                   |                                                                                                                                                                            |
| 1.73  | 0.00708 | 0.149 | 202516_s_at |   | DLG1     | discs large MAGUK scaffold protein 1                  | Plasma Membrane | kinase                  |                                                                                                                                                                            |
| 1.58  | 0.00296 | 0.124 | 205554_s_at |   | DNASE1L3 | deoxyribonuclease 1 like 3                            | Nucleus         | enzyme                  |                                                                                                                                                                            |
| 1.54  | 0.00884 | 0.158 | 205003_at   |   | DOCK4    | dedicator of cytokinesis 4                            | Plasma Membrane | other                   |                                                                                                                                                                            |
| 1.87  | 0.0308  | 0.221 | 204751_x_at |   | DSC2     | desmocollin 2                                         | Plasma Membrane | other                   |                                                                                                                                                                            |
| -1.51 | 0.00117 | 0.109 | 203590_at   |   | DYNC1LI2 | dynein cytoplasmic 1 light intermediate chain 2       | Cytoplasm       | other                   |                                                                                                                                                                            |
| -1.55 | 0.0117  | 0.168 | 202735_at   |   | EBP      | EBP, cholesterol delta-isomerase                      | Cytoplasm       | enzyme                  | SR 31747                                                                                                                                                                   |
| 1.56  | 0.0187  | 0.191 | 204463_s_at |   | EDNRA    | endothelin receptor type A                            | Plasma Membrane | transmembrane receptor  | bosentan, avosentan, clazosentan, ambrisentan, sitaxsentan, zibotentan, SB 234551, TBC 3214, BSF 302146, YM598, macitentan, ambrisentan/tadalafil, fandosentan, atrasentan |
| 2.07  | 0.00914 | 0.158 | 204841_s_at |   | EEA1     | early endosome antigen 1                              | Cytoplasm       | other                   |                                                                                                                                                                            |
| 1.51  | 0.0403  | 0.242 | 31845_at    |   | ELF4     | E74 like ETS transcription factor 4                   | Nucleus         | transcription regulator |                                                                                                                                                                            |
| 1.72  | 0.0234  | 0.204 | 207691_x_at | D | ENTPD1   | ectonucleoside triphosphate diphosphohydrolase 1      | Plasma Membrane | enzyme                  |                                                                                                                                                                            |
| 1.69  | 0.0261  | 0.21  | 209474_s_at | D | ENTPD1   | ectonucleoside triphosphate diphosphohydrolase 1      | Plasma Membrane | enzyme                  |                                                                                                                                                                            |
| -2.1  | 0.025   | 0.207 | 205757_at   |   | ENTPD5   | ectonucleoside triphosphate diphosphohydrolase 5      | Cytoplasm       | enzyme                  |                                                                                                                                                                            |

**Table K:** Time dependent changes in gene expression in TAC + MMF Group shown in Figure 8

|       |         |       |             |   |          |                                                |                     |                         |                                                                                                                                                                                                                                                                                                                                                                                                                                                                                                                                                           |
|-------|---------|-------|-------------|---|----------|------------------------------------------------|---------------------|-------------------------|-----------------------------------------------------------------------------------------------------------------------------------------------------------------------------------------------------------------------------------------------------------------------------------------------------------------------------------------------------------------------------------------------------------------------------------------------------------------------------------------------------------------------------------------------------------|
| 1.98  | 0.00981 | 0.16  | 203499_at   |   | EPHA2    | EPH receptor A2                                | Plasma Membrane     | kinase                  | dasatinib, MEDI-547, regorafenib, ephA2-targeting DOPC-encapsulated siRNA, DS-8895a, dasatinib/dexamethasone, dasatinib/nilotinib, cytarabine/dasatinib/dexamethasone/methotrexate, dasatinib/erlotinib                                                                                                                                                                                                                                                                                                                                                   |
| 1.69  | 0.0102  | 0.162 | 206852_at   |   | EPHA7    | EPH receptor A7                                | Plasma Membrane     | kinase                  |                                                                                                                                                                                                                                                                                                                                                                                                                                                                                                                                                           |
| 1.66  | 0.00086 | 0.106 | 210870_s_at |   | EPM2A    | EPM2A, laforin glucan phosphatase              | Cytoplasm           | phosphatase             |                                                                                                                                                                                                                                                                                                                                                                                                                                                                                                                                                           |
| -1.55 | 0.00171 | 0.12  | 396_f_at    |   | EPOR     | erythropoietin receptor                        | Plasma Membrane     | transmembrane receptor  | darbepoetin alfa, continuous erythropoietin receptor activator, peginesatide, epoetin beta, EPO, EPO/sargramostim, darbepoetin alfa/filgrastim, EPO/filgrastim, erythropoietin/lenalidomide                                                                                                                                                                                                                                                                                                                                                               |
| 1.51  | 0.024   | 0.205 | 221542_s_at |   | ERLIN2   | ER lipid raft associated 2                     | Plasma Membrane     | kinase                  |                                                                                                                                                                                                                                                                                                                                                                                                                                                                                                                                                           |
| -2.42 | 0.004   | 0.135 | 208394_x_at |   | ESM1     | endothelial cell specific molecule 1           | Extracellular Space | growth factor           |                                                                                                                                                                                                                                                                                                                                                                                                                                                                                                                                                           |
| 1.85  | 0.00862 | 0.157 | 218748_s_at |   | EXOC5    | exocyst complex component 5                    | Cytoplasm           | other                   |                                                                                                                                                                                                                                                                                                                                                                                                                                                                                                                                                           |
| -5.65 | 0.0445  | 0.252 | 205892_s_at |   | FABP1    | fatty acid binding protein 1                   | Cytoplasm           | transporter             |                                                                                                                                                                                                                                                                                                                                                                                                                                                                                                                                                           |
| -1.82 | 0.0093  | 0.16  | 215600_x_at |   | FBXW12   | F-box and WD repeat domain containing 12       | Cytoplasm           | enzyme                  |                                                                                                                                                                                                                                                                                                                                                                                                                                                                                                                                                           |
| 2.5   | 0.00352 | 0.131 | 211734_s_at |   | FCER1A   | Fc fragment of IgE receptor 1a                 | Plasma Membrane     | transmembrane receptor  |                                                                                                                                                                                                                                                                                                                                                                                                                                                                                                                                                           |
| 1.57  | 0.00583 | 0.144 | 207501_s_at |   | FGF12    | fibroblast growth factor 12                    | Extracellular Space | other                   |                                                                                                                                                                                                                                                                                                                                                                                                                                                                                                                                                           |
| 1.93  | 0.00541 | 0.143 | 204421_s_at | D | FGF2     | fibroblast growth factor 2                     | Extracellular Space | growth factor           | pentosan polysulfate, suradista, CP-547632, sucalfate                                                                                                                                                                                                                                                                                                                                                                                                                                                                                                     |
| 2.16  | 0.0303  | 0.219 | 204422_s_at | D | FGF2     | fibroblast growth factor 2                     | Extracellular Space | growth factor           | pentosan polysulfate, suradista, CP-547632, sucalfate                                                                                                                                                                                                                                                                                                                                                                                                                                                                                                     |
| 2.1   | 0.0262  | 0.21  | 211401_s_at |   | FGFR2    | fibroblast growth factor receptor 2            | Plasma Membrane     | kinase                  | pazopanib, lenvatinib, nintedanib, regorafenib, dexamethasone/thalidomide, bortezomib/dexamethasone/thalidomide, rituximab/thalidomide, bortezomib/thalidomide, prednisone/thalidomide, BAY1179470, lucitanib, debio 1347, ARQ 087, FPA144, BAY1187982, pemigatinib, PRN1371, docetaxel/nintedanib, everolimus/lenvatinib, thalidomide, palifermin                                                                                                                                                                                                        |
| 1.85  | 0.00593 | 0.145 | 204834_at   |   | FGL2     | fibrinogen like 2                              | Extracellular Space | peptidase               |                                                                                                                                                                                                                                                                                                                                                                                                                                                                                                                                                           |
| 2.18  | 0.00326 | 0.128 | 220170_at   |   | FHL5     | four and a half LIM domains 5                  | Nucleus             | transcription regulator |                                                                                                                                                                                                                                                                                                                                                                                                                                                                                                                                                           |
| 1.79  | 0.0101  | 0.162 | 210186_s_at |   | FKBP1A   | FK506 binding protein 1A                       | Cytoplasm           | enzyme                  | methotrexate/sirolimus/tacrolimus, everolimus/exemestane, lenalidomide/temsirolimus, imatinib/sirolimus, cyclophosphamide/sirolimus, cyclosporine A/tacrolimus, cyclosporine A/sirolimus/tacrolimus, everolimus/panobinostat, everolimus/pasireotide, ABI-009, everolimus/sorafenib, everolimus/gefitinib, everolimus/lenvatinib, sirolimus, temsirolimus, tacrolimus, everolimus/tamoxifen, everolimus, everolimus/fulvestrant, everolimus/letrozole, prednisone/tacrolimus, methylprednisolone/tacrolimus, everolimus/vandetanib, everolimus/ribociclib |
| 2.08  | 0.0102  | 0.162 | 210786_s_at |   | FLI1     | Fli-1 proto-oncogene, ETS transcription factor | Nucleus             | transcription regulator |                                                                                                                                                                                                                                                                                                                                                                                                                                                                                                                                                           |
| -1.51 | 0.00149 | 0.117 | 220352_x_at |   | FLJ42627 | uncharacterized LOC645644                      | Other               | other                   |                                                                                                                                                                                                                                                                                                                                                                                                                                                                                                                                                           |

**Table K:** Time dependent changes in gene expression in TAC + MMF Group shown in Figure 8

|       |          |        |             |   |               |                                                       |                 |                            |  |
|-------|----------|--------|-------------|---|---------------|-------------------------------------------------------|-----------------|----------------------------|--|
| 1.62  | 0.0105   | 0.163  | 212288_at   |   | FNBP1         | formin binding protein 1                              | Nucleus         | enzyme                     |  |
| 2.12  | 0.000056 | 0.0687 | 215910_s_at |   | FNDC3A        | fibronectin type III domain containing 3A             | Cytoplasm       | other                      |  |
| 1.95  | 0.0134   | 0.173  | 206307_s_at |   | FOXD1         | forkhead box D1                                       | Nucleus         | transcription regulator    |  |
| 1.71  | 0.00121  | 0.109  | 201564_s_at |   | FSCN1         | fascin actin-bundling protein 1                       | Cytoplasm       | other                      |  |
| 2     | 0.00232  | 0.122  | 210188_at   |   | GABPA         | GA binding protein transcription factor subunit alpha | Nucleus         | transcription regulator    |  |
| 1.51  | 0.0203   | 0.196  | 211810_s_at |   | GALC          | galactosylceramidase                                  | Cytoplasm       | enzyme                     |  |
| 1.59  | 0.0481   | 0.259  | 210002_at   |   | GATA6         | GATA binding protein 6                                | Nucleus         | transcription regulator    |  |
| 1.71  | 0.00943  | 0.16   | 212241_at   |   | GCOM1         | GRINL1A complex locus 1                               | Other           | other                      |  |
| 1.55  | 0.0169   | 0.186  | 218458_at   |   | GMCL1         | germ cell-less, spermatogenesis associated 1          | Nucleus         | other                      |  |
| 1.63  | 0.000342 | 0.0977 | 211426_x_at |   | GNAQ          | G protein subunit alpha q                             | Plasma Membrane | enzyme                     |  |
| 1.5   | 0.00103  | 0.106  | 214548_x_at |   | GNAS          | GNAS complex locus                                    | Plasma Membrane | enzyme                     |  |
| -1.97 | 0.0235   | 0.204  | 202382_s_at |   | GNPDA1        | glucosamine-6-phosphate deaminase 1                   | Cytoplasm       | enzyme                     |  |
| -1.59 | 0.00982  | 0.16   | 204324_s_at |   | GOLIM4        | golgi integral membrane protein 4                     | Cytoplasm       | other                      |  |
| 1.77  | 0.0164   | 0.184  | 210007_s_at |   | GPD2          | glycerol-3-phosphate dehydrogenase 2                  | Cytoplasm       | enzyme                     |  |
| 6.14  | 0.0277   | 0.213  | 209469_at   | D | GPM6A         | glycoprotein M6A                                      | Plasma Membrane | ion channel                |  |
| 7.24  | 0.0327   | 0.225  | 209470_s_at | D | GPM6A         | glycoprotein M6A                                      | Plasma Membrane | ion channel                |  |
| -2    | 0.0373   | 0.235  | 204137_at   |   | GPR137B       | G protein-coupled receptor 137B                       | Plasma Membrane | other                      |  |
| 2.3   | 0.0242   | 0.206  | 207651_at   |   | GPR171        | G protein-coupled receptor 171                        | Plasma Membrane | G-protein coupled receptor |  |
| 1.97  | 0.0411   | 0.243  | 210279_at   |   | GPR18         | G protein-coupled receptor 18                         | Plasma Membrane | G-protein coupled receptor |  |
| -1.54 | 0.0429   | 0.248  | 222140_s_at |   | GPR89A/GPR89B | G protein-coupled receptor 89B                        | Cytoplasm       | ion channel                |  |
| 1.58  | 0.00567  | 0.143  | 212856_at   |   | GRAMD4        | GRAM domain containing 4                              | Cytoplasm       | other                      |  |
| 1.54  | 0.0467   | 0.256  | 204396_s_at |   | GRK5          | G protein-coupled receptor kinase 5                   | Plasma Membrane | kinase                     |  |
| -1.81 | 0.000593 | 0.103  | 222104_x_at |   | GTF2H3        | general transcription factor IIH subunit 3            | Nucleus         | transcription regulator    |  |
| 2.87  | 0.0282   | 0.214  | 205488_at   |   | GZMA          | granzyme A                                            | Cytoplasm       | peptidase                  |  |
| 2.32  | 0.0385   | 0.238  | 206666_at   |   | GZMK          | granzyme K                                            | Cytoplasm       | peptidase                  |  |
| -1.63 | 0.00414  | 0.135  | 220071_x_at |   | HAUS2         | HAUS augmin like complex subunit 2                    | Cytoplasm       | other                      |  |
| 1.65  | 0.0367   | 0.233  | 206082_at   |   | HCP5          | HLA complex P5                                        | Other           | other                      |  |

**Table K:** Time dependent changes in gene expression in TAC + MMF Group shown in Figure 8

|       |          |        |             |   |          |                                                             |                     |                            |                                                                       |
|-------|----------|--------|-------------|---|----------|-------------------------------------------------------------|---------------------|----------------------------|-----------------------------------------------------------------------|
| 2.43  | 0.002    | 0.12   | 210148_at   |   | HIPK3    | homeodomain interacting protein kinase 3                    | Nucleus             | kinase                     |                                                                       |
| 1.68  | 0.0134   | 0.173  | 200697_at   |   | HK1      | hexokinase 1                                                | Cytoplasm           | kinase                     |                                                                       |
| 1.74  | 0.0464   | 0.256  | 221491_x_at |   | HLA-DRB1 | major histocompatibility complex, class II, DR beta 1       | Plasma Membrane     | transmembrane receptor     | apolizumab                                                            |
| -1.51 | 0.0466   | 0.256  | 208429_x_at |   | HNF4A    | hepatocyte nuclear factor 4 alpha                           | Nucleus             | transcription regulator    |                                                                       |
| -1.52 | 0.0403   | 0.242  | 222264_at   |   | HNRNPUL2 | heterogeneous nuclear ribonucleoprotein U like 2            | Nucleus             | other                      |                                                                       |
| 1.59  | 0.000285 | 0.0977 | 213823_at   |   | HOXA11   | homeobox A11                                                | Nucleus             | transcription regulator    |                                                                       |
| 1.69  | 0.00722  | 0.15   | 205466_s_at |   | HS3ST1   | heparan sulfate-glucosamine 3-sulfotransferase 1            | Cytoplasm           | enzyme                     |                                                                       |
| 1.76  | 0.0358   | 0.232  | 211220_s_at |   | HSF2     | heat shock transcription factor 2                           | Nucleus             | transcription regulator    |                                                                       |
| 1.68  | 0.00184  | 0.12   | 202558_s_at |   | HSPA13   | heat shock protein family A (Hsp70) member 13               | Cytoplasm           | other                      |                                                                       |
| 1.7   | 0.00473  | 0.138  | 202601_s_at |   | HTATSF1  | HIV-1 Tat specific factor 1                                 | Nucleus             | transcription regulator    |                                                                       |
| -1.5  | 0.00163  | 0.119  | 206944_at   |   | HTR6     | 5-hydroxytryptamine receptor 6                              | Plasma Membrane     | G-protein coupled receptor | iloperidone, asenapine, WAY-181187, olanzapine, sertindole            |
| 1.64  | 0.0165   | 0.184  | 206855_s_at |   | HYAL2    | hyaluronoglucosaminidase 2                                  | Cytoplasm           | enzyme                     | hyaluronic acid, hylan, diclofenac/hyaluronic acid                    |
| 1.62  | 0.0369   | 0.234  | 207826_s_at |   | ID3      | inhibitor of DNA binding 3, HLH protein                     | Nucleus             | transcription regulator    |                                                                       |
| 2.28  | 0.0406   | 0.242  | 209291_at   | D | ID4      | inhibitor of DNA binding 4, HLH protein                     | Nucleus             | transcription regulator    |                                                                       |
| 1.87  | 0.0485   | 0.26   | 209293_x_at | D | ID4      | inhibitor of DNA binding 4, HLH protein                     | Nucleus             | transcription regulator    |                                                                       |
| -1.88 | 0.0169   | 0.186  | 201193_at   |   | IDH1     | isocitrate dehydrogenase (NADP(+)) 1, cytosolic             | Cytoplasm           | enzyme                     | ivosidenib, IDH305, olutasidenib, BAY1436032, IDH1 inhibitor, DS-1001 |
| 1.51  | 0.00623  | 0.147  | 217502_at   |   | IFIT2    | interferon induced protein with tetratricopeptide repeats 2 | Cytoplasm           | other                      |                                                                       |
| 3.02  | 0.0451   | 0.254  | 217022_s_at |   | IGHA1    | immunoglobulin heavy constant alpha 1                       | Extracellular Space | other                      |                                                                       |
| 2.56  | 0.0136   | 0.174  | 209374_s_at | D | IGHM     | immunoglobulin heavy constant mu                            | Plasma Membrane     | transmembrane receptor     |                                                                       |
| 1.66  | 0.015    | 0.179  | 216491_x_at | D | IGHM     | immunoglobulin heavy constant mu                            | Plasma Membrane     | transmembrane receptor     |                                                                       |
| 1.62  | 0.0368   | 0.233  | 211634_x_at | D | IGHM     | immunoglobulin heavy constant mu                            | Plasma Membrane     | transmembrane receptor     |                                                                       |



**Table K:** Time dependent changes in gene expression in TAC + MMF Group shown in Figure 8

|       |         |       |             |   |            |                                                          |                     |                         |                                                                                                                                                                                                                 |
|-------|---------|-------|-------------|---|------------|----------------------------------------------------------|---------------------|-------------------------|-----------------------------------------------------------------------------------------------------------------------------------------------------------------------------------------------------------------|
| 2.33  | 0.0136  | 0.174 | 211644_x_at | D | IGKC       | immunoglobulin kappa constant                            | Extracellular Space | other                   |                                                                                                                                                                                                                 |
| 1.63  | 0.0299  | 0.218 | 211643_x_at | D | IGKC       | immunoglobulin kappa constant                            | Extracellular Space | other                   |                                                                                                                                                                                                                 |
| 2.89  | 0.0329  | 0.226 | 214669_x_at | D | IGKC       | immunoglobulin kappa constant                            | Extracellular Space | other                   |                                                                                                                                                                                                                 |
| 2.28  | 0.0428  | 0.248 | 221651_x_at | D | IGKC       | immunoglobulin kappa constant                            | Extracellular Space | other                   |                                                                                                                                                                                                                 |
| 2.22  | 0.0495  | 0.263 | 221671_x_at | D | IGKC       | immunoglobulin kappa constant                            | Extracellular Space | other                   |                                                                                                                                                                                                                 |
| 2.38  | 0.0409  | 0.243 | 211645_x_at |   | IGKV1-17   | immunoglobulin kappa variable 1-17                       | Extracellular Space | other                   |                                                                                                                                                                                                                 |
| 1.57  | 0.0457  | 0.254 | 217378_x_at |   | IGKV1OR2-1 | immunoglobulin kappa variable 1/OR2-108 (non-functional) | Other               | other                   |                                                                                                                                                                                                                 |
| 1.71  | 0.00213 | 0.121 | 205992_s_at |   | IL15       | interleukin 15                                           | Extracellular Space | cytokine                | ALT-803                                                                                                                                                                                                         |
| 1.65  | 0.0436  | 0.249 | 209827_s_at |   | IL16       | interleukin 16                                           | Extracellular Space | cytokine                |                                                                                                                                                                                                                 |
| 1.98  | 0.00461 | 0.137 | 222062_at   |   | IL27RA     | interleukin 27 receptor subunit alpha                    | Plasma Membrane     | transmembrane receptor  |                                                                                                                                                                                                                 |
| 2.13  | 0.0365  | 0.233 | 205798_at   |   | IL7R       | interleukin 7 receptor                                   | Plasma Membrane     | transmembrane receptor  | recombinant human interleukin-7                                                                                                                                                                                 |
| 1.51  | 0.00926 | 0.159 | 205376_at   |   | INPP4B     | inositol polyphosphate-4-phosphatase type II B           | Cytoplasm           | phosphatase             |                                                                                                                                                                                                                 |
| -1.75 | 0.00328 | 0.128 | 219843_at   |   | IPP        | intracisternal A particle-promoted polypeptide           | Cytoplasm           | other                   |                                                                                                                                                                                                                 |
| 1.71  | 0.0285  | 0.215 | 204057_at   |   | IRF8       | interferon regulatory factor 8                           | Nucleus             | transcription regulator |                                                                                                                                                                                                                 |
| 2.4   | 0.0394  | 0.239 | 204698_at   |   | ISG20      | interferon stimulated exonuclease gene 20                | Nucleus             | enzyme                  |                                                                                                                                                                                                                 |
| -1.51 | 0.0385  | 0.238 | 218893_at   |   | ISOC2      | isochorismatase domain containing 2                      | Cytoplasm           | enzyme                  |                                                                                                                                                                                                                 |
| 2.88  | 0.0483  | 0.26  | 205885_s_at |   | ITGA4      | integrin subunit alpha 4                                 | Plasma Membrane     | transmembrane receptor  | natalizumab, vedolizumab                                                                                                                                                                                        |
| 1.57  | 0.00388 | 0.135 | 205816_at   |   | ITGB8      | integrin subunit beta 8                                  | Plasma Membrane     | other                   |                                                                                                                                                                                                                 |
| 1.98  | 0.0363  | 0.233 | 211339_s_at |   | ITK        | IL2 inducible T cell kinase                              | Cytoplasm           | kinase                  | pazopanib, crizotinib/pazopanib                                                                                                                                                                                 |
| 1.73  | 0.0107  | 0.164 | 211323_s_at |   | ITPR1      | inositol 1,4,5-trisphosphate receptor type 1             | Cytoplasm           | ion channel             |                                                                                                                                                                                                                 |
| 1.69  | 0.00808 | 0.155 | 201188_s_at | D | ITPR3      | inositol 1,4,5-trisphosphate receptor type 3             | Cytoplasm           | ion channel             |                                                                                                                                                                                                                 |
| 1.72  | 0.0135  | 0.174 | 201189_s_at | D | ITPR3      | inositol 1,4,5-trisphosphate receptor type 3             | Cytoplasm           | ion channel             |                                                                                                                                                                                                                 |
| 2.95  | 0.0368  | 0.234 | 209098_s_at |   | JAG1       | jagged 1                                                 | Extracellular Space | growth factor           |                                                                                                                                                                                                                 |
| 1.85  | 0.00515 | 0.141 | 205842_s_at | D | JAK2       | Janus kinase 2                                           | Cytoplasm           | kinase                  | WP1066, tofacitinib, fedratinib, pacritinib, XL019, ruxolitinib, AZD1480, momelotinib, baricitinib, NS-018, SB-1317, gandotinib, BMS-911543, jak2 inhibitor, methotrexate/tofacitinib, baricitinib/methotrexate |

**Table K:** Time dependent changes in gene expression in TAC + MMF Group shown in Figure 8

|       |         |       |             |   |            |                                                                              |                 |                         |                                                                                                                                                                                                                 |
|-------|---------|-------|-------------|---|------------|------------------------------------------------------------------------------|-----------------|-------------------------|-----------------------------------------------------------------------------------------------------------------------------------------------------------------------------------------------------------------|
| 1.77  | 0.00662 | 0.148 | 205841_at   | D | JAK2       | Janus kinase 2                                                               | Cytoplasm       | kinase                  | WP1066, tofacitinib, fedratinib, pacritinib, XL019, ruxolitinib, AZD1480, momelotinib, baricitinib, NS-018, SB-1317, gandotinib, BMS-911543, jak2 inhibitor, methotrexate/tofacitinib, baricitinib/methotrexate |
| 1.54  | 0.00787 | 0.154 | 219095_at   |   | JMJD7-PLA2 | JMJD7-PLA2G4B readthrough                                                    | Cytoplasm       | other                   |                                                                                                                                                                                                                 |
| 1.53  | 0.0402  | 0.241 | 210078_s_at |   | KCNAB1     | potassium voltage-gated channel subfamily A member regulatory beta subunit 1 | Plasma Membrane | ion channel             |                                                                                                                                                                                                                 |
| -1.78 | 0.0414  | 0.244 | 203402_at   |   | KCNAB2     | potassium voltage-gated channel subfamily A regulatory beta subunit 2        | Plasma Membrane | ion channel             |                                                                                                                                                                                                                 |
| 1.55  | 0.0126  | 0.171 | 203990_s_at | D | KDM6A      | lysine demethylase 6A                                                        | Nucleus         | enzyme                  |                                                                                                                                                                                                                 |
| 1.5   | 0.0172  | 0.187 | 203991_s_at | D | KDM6A      | lysine demethylase 6A                                                        | Nucleus         | enzyme                  |                                                                                                                                                                                                                 |
| 1.61  | 0.0197  | 0.193 | 220266_s_at | D | KLF4       | Kruppel like factor 4                                                        | Nucleus         | transcription regulator |                                                                                                                                                                                                                 |
| 1.62  | 0.0236  | 0.204 | 221841_s_at | D | KLF4       | Kruppel like factor 4                                                        | Nucleus         | transcription regulator |                                                                                                                                                                                                                 |
| 1.52  | 0.0243  | 0.206 | 220238_s_at |   | KLHL7      | kelch like family member 7                                                   | Nucleus         | other                   |                                                                                                                                                                                                                 |
| 3.5   | 0.00699 | 0.149 | 214470_at   |   | KLRB1      | killer cell lectin like receptor B1                                          | Plasma Membrane | transmembrane receptor  |                                                                                                                                                                                                                 |
| 2.48  | 0.0143  | 0.175 | 220646_s_at |   | KLRF1      | killer cell lectin like receptor F1                                          | Plasma Membrane | transmembrane receptor  |                                                                                                                                                                                                                 |
| 2.4   | 0.0176  | 0.188 | 204891_s_at | D | LCK        | LCK proto-oncogene, Src family tyrosine kinase                               | Cytoplasm       | kinase                  | dasatinib, pazopanib, dacomitinib, nintedanib, JNJ-26483327, docetaxel/nintedanib, dasatinib/nilotinib, crizotinib/pazopanib, dasatinib/erlotinib                                                               |
| 1.52  | 0.0326  | 0.225 | 204890_s_at | D | LCK        | LCK proto-oncogene, Src family tyrosine kinase                               | Cytoplasm       | kinase                  | dasatinib, pazopanib, dacomitinib, nintedanib, JNJ-26483327, docetaxel/nintedanib, dasatinib/nilotinib, crizotinib/pazopanib, dasatinib/erlotinib                                                               |
| 2.02  | 0.0023  | 0.122 | 211354_s_at | D | LEPR       | leptin receptor                                                              | Plasma Membrane | transmembrane receptor  | recombinant-methionyl human leptin                                                                                                                                                                              |
| 2.03  | 0.00277 | 0.122 | 211355_x_at | D | LEPR       | leptin receptor                                                              | Plasma Membrane | transmembrane receptor  | recombinant-methionyl human leptin                                                                                                                                                                              |
| 2.09  | 0.00666 | 0.148 | 211356_x_at | D | LEPR       | leptin receptor                                                              | Plasma Membrane | transmembrane receptor  | recombinant-methionyl human leptin                                                                                                                                                                              |
| 1.57  | 0.00203 | 0.12  | 219884_at   |   | LHX6       | LIM homeobox 6                                                               | Nucleus         | transcription regulator |                                                                                                                                                                                                                 |
| 1.52  | 0.0221  | 0.2   | 219399_at   |   | LIN7C      | lin-7 homolog C, crumbs cell polarity complex component                      | Cytoplasm       | other                   |                                                                                                                                                                                                                 |
| 1.82  | 0.00204 | 0.12  | 203294_s_at |   | LMAN1      | lectin, mannose binding 1                                                    | Cytoplasm       | other                   |                                                                                                                                                                                                                 |
| 1.58  | 0.00214 | 0.121 | 207904_s_at |   | LNPEP      | leucyl and cystinyl aminopeptidase                                           | Cytoplasm       | peptidase               |                                                                                                                                                                                                                 |
| -1.54 | 0.0175  | 0.187 | 216229_x_at |   | LOC1053796 | uncharacterized LOC105379655                                                 | Other           | other                   |                                                                                                                                                                                                                 |

**Table K:** Time dependent changes in gene expression in TAC + MMF Group shown in Figure 8

|       |          |        |             |            |                                                                      |                     |                         |                                                                                                                                                                                                                      |
|-------|----------|--------|-------------|------------|----------------------------------------------------------------------|---------------------|-------------------------|----------------------------------------------------------------------------------------------------------------------------------------------------------------------------------------------------------------------|
| -1.55 | 0.00327  | 0.128  | 215778_x_at | LOC1079867 | enolase-phosphatase E1                                               | Other               | other                   |                                                                                                                                                                                                                      |
| 1.54  | 0.000283 | 0.0977 | 201818_at   | LPCAT1     | lysophosphatidylcholine acyltransferase 1                            | Cytoplasm           | enzyme                  |                                                                                                                                                                                                                      |
| 1.59  | 0.0362   | 0.233  | 204442_x_at | LTBP4      | latent transforming growth factor beta binding protein 4             | Extracellular Space | growth factor           |                                                                                                                                                                                                                      |
| -1.8  | 0.0103   | 0.162  | 207106_s_at | LTK        | leukocyte receptor tyrosine kinase                                   | Plasma Membrane     | kinase                  | lorlatinib                                                                                                                                                                                                           |
| 2     | 0.0019   | 0.12   | 205668_at   | LY75       | lymphocyte antigen 75                                                | Plasma Membrane     | transmembrane receptor  | CDX 1401, MEN1309                                                                                                                                                                                                    |
| 1.83  | 0.036    | 0.232  | 36711_at    | MAFF       | MAF bZIP transcription factor F                                      | Nucleus             | transcription regulator |                                                                                                                                                                                                                      |
| -2.35 | 0.0246   | 0.207  | 222372_at   | MAGI1      | membrane associated guanylate kinase, WW and PDZ domain containing 1 | Plasma Membrane     | kinase                  |                                                                                                                                                                                                                      |
| 2.05  | 0.0038   | 0.134  | 208116_s_at | MAN1A1     | mannosidase alpha class 1A member 1                                  | Cytoplasm           | enzyme                  |                                                                                                                                                                                                                      |
| 1.5   | 0.00806  | 0.155  | 217921_at   | MAN1A2     | mannosidase alpha class 1A member 2                                  | Cytoplasm           | enzyme                  |                                                                                                                                                                                                                      |
| 1.8   | 0.000158 | 0.0892 | 219003_s_at | MANEA      | mannosidase endo-alpha                                               | Cytoplasm           | enzyme                  |                                                                                                                                                                                                                      |
| -1.67 | 0.00179  | 0.12   | 216206_x_at | MAP2K7     | mitogen-activated protein kinase kinase 7                            | Cytoplasm           | kinase                  |                                                                                                                                                                                                                      |
| 2.81  | 0.00545  | 0.143  | 214786_at   | MAP3K1     | mitogen-activated protein kinase kinase kinase 1                     | Cytoplasm           | kinase                  | E 6201                                                                                                                                                                                                               |
| 1.59  | 0.000627 | 0.103  | 221695_s_at | MAP3K2     | mitogen-activated protein kinase kinase kinase 2                     | Cytoplasm           | kinase                  |                                                                                                                                                                                                                      |
| 1.78  | 0.0436   | 0.249  | 203553_s_at | MAP4K5     | mitogen-activated protein kinase kinase kinase 5                     | Cytoplasm           | kinase                  | vemurafenib, cobimetinib/vemurafenib, dabrafenib/trametinib/vemurafenib, cetuximab/vemurafenib, trametinib/vemurafenib, irinotecan/panitumumab/vemurafenib, cetuximab/irinotecan/vemurafenib, crizotinib/vemurafenib |
| 1.85  | 0.0207   | 0.197  | 201669_s_at | MARCKS     | myristoylated alanine rich protein kinase C substrate                | Plasma Membrane     | other                   |                                                                                                                                                                                                                      |
| -2.08 | 0.0226   | 0.202  | 222348_at   | MAST4      | microtubule associated serine/threonine kinase family member 4       | Other               | kinase                  |                                                                                                                                                                                                                      |
| 1.73  | 0.00209  | 0.121  | 205017_s_at | D MBNL2    | muscleblind like splicing regulator 2                                | Nucleus             | other                   |                                                                                                                                                                                                                      |
| 1.96  | 0.00639  | 0.148  | 205018_s_at | D MBNL2    | muscleblind like splicing regulator 2                                | Nucleus             | other                   |                                                                                                                                                                                                                      |
| 1.85  | 0.0433   | 0.249  | 210869_s_at | MCAM       | melanoma cell adhesion molecule                                      | Plasma Membrane     | other                   |                                                                                                                                                                                                                      |

**Table K:** Time dependent changes in gene expression in TAC + MMF Group shown in Figure 8

|       |          |        |             |   |         |                                                                          |                     |                         |                                                                                                  |
|-------|----------|--------|-------------|---|---------|--------------------------------------------------------------------------|---------------------|-------------------------|--------------------------------------------------------------------------------------------------|
| 1.52  | 0.0136   | 0.174  | 214056_at   |   | MCL1    | MCL1, BCL2 family apoptosis regulator                                    | Cytoplasm           | transporter             | MIK665, AMG 176, AMG 397                                                                         |
| 1.5   | 0.00759  | 0.152  | 210154_at   |   | ME2     | malic enzyme 2                                                           | Cytoplasm           | enzyme                  |                                                                                                  |
| 1.59  | 0.000918 | 0.106  | 216071_x_at |   | MED12   | mediator complex subunit 12                                              | Nucleus             | transcription regulator |                                                                                                  |
| -2.22 | 0.000031 | 0.0655 | 219730_at   | D | MED18   | mediator complex subunit 18                                              | Nucleus             | other                   |                                                                                                  |
| -1.9  | 0.00255  | 0.122  | 221650_s_at | D | MED18   | mediator complex subunit 18                                              | Nucleus             | other                   |                                                                                                  |
| 1.52  | 0.0269   | 0.212  | 212830_at   |   | MEGF9   | multiple EGF like domains 9                                              | Extracellular Space | other                   |                                                                                                  |
| 1.91  | 0.0105   | 0.163  | 211913_s_at |   | MERTK   | MER proto-oncogene, tyrosine kinase                                      | Plasma Membrane     | kinase                  | cabozantinib, cabozantinib/erlotinib, sitravatinib, ONO-7475, INCB081776, cabozantinib/nivolumab |
| -1.58 | 0.0359   | 0.232  | 204027_s_at |   | METTL1  | methyltransferase like 1                                                 | Nucleus             | enzyme                  |                                                                                                  |
| -1.54 | 0.00556  | 0.143  | 211424_x_at | D | METTL7A | methyltransferase like 7A                                                | Cytoplasm           | other                   |                                                                                                  |
| -1.84 | 0.0138   | 0.174  | 209703_x_at | D | METTL7A | methyltransferase like 7A                                                | Cytoplasm           | other                   |                                                                                                  |
| 1.59  | 0.0253   | 0.209  | 91816_f_at  |   | MEX3D   | mex-3 RNA binding family member D                                        | Nucleus             | other                   |                                                                                                  |
| 1.53  | 0.0118   | 0.168  | 219797_at   |   | MGAT4A  | alpha-1,3-mannosyl-glycoprotein 4-beta-N-acetylglucosaminyltransferase A | Cytoplasm           | enzyme                  |                                                                                                  |
| -1.72 | 0.0356   | 0.231  | 212925_at   |   | MISP    | mitotic spindle positioning                                              | Plasma Membrane     | other                   |                                                                                                  |
| 1.65  | 0.0233   | 0.204  | 205408_at   |   | MLLT10  | MLLT10, histone lysine methyltransferase DOT1L cofactor                  | Nucleus             | transcription regulator |                                                                                                  |
| -4.29 | 0.032    | 0.224  | 204580_at   |   | MMP12   | matrix metalloproteinase 12                                              | Extracellular Space | peptidase               | marimastat                                                                                       |
| 1.88  | 0.0384   | 0.238  | 219091_s_at |   | MMRN2   | multimerin 2                                                             | Extracellular Space | other                   |                                                                                                  |
| 2.33  | 0.0162   | 0.183  | 209708_at   |   | MOXD1   | monooxygenase DBH like 1                                                 | Cytoplasm           | enzyme                  |                                                                                                  |
| 1.56  | 0.0081   | 0.155  | 209421_at   |   | MSH2    | mutS homolog 2                                                           | Nucleus             | enzyme                  |                                                                                                  |
| 1.58  | 0.0137   | 0.174  | 211363_s_at |   | MTAP    | methylthioadenosine phosphorylase                                        | Nucleus             | enzyme                  |                                                                                                  |
| -2.27 | 0.0315   | 0.223  | 205675_at   |   | MTTP    | microsomal triglyceride transfer protein                                 | Cytoplasm           | transporter             | lomitapide, hesperetin                                                                           |
| -1.94 | 0.0488   | 0.261  | 218687_s_at |   | MUC13   | mucin 13, cell surface associated                                        | Extracellular Space | other                   |                                                                                                  |
| 1.53  | 0.0014   | 0.114  | 214156_at   |   | MYRIP   | myosin VIIA and Rab interacting protein                                  | Cytoplasm           | other                   |                                                                                                  |
| -1.54 | 0.0132   | 0.173  | 220720_x_at |   | MZT2B   | mitotic spindle organizing protein 2B                                    | Cytoplasm           | other                   |                                                                                                  |
| -1.63 | 0.0175   | 0.188  | 214753_at   |   | N4BP2L2 | NEDD4 binding protein 2 like 2                                           | Nucleus             | transcription regulator |                                                                                                  |

**Table K:** Time dependent changes in gene expression in TAC + MMF Group shown in Figure 8

|       |          |       |             |   |        |                                                       |                     |                                   |                                                                                                                                                                |
|-------|----------|-------|-------------|---|--------|-------------------------------------------------------|---------------------|-----------------------------------|----------------------------------------------------------------------------------------------------------------------------------------------------------------|
| 1.53  | 0.0165   | 0.184 | 222369_at   |   | NAA40  | N(alpha)-acetyltransferase 40, NatD catalytic subunit | Other               | other                             |                                                                                                                                                                |
| 1.81  | 0.000668 | 0.103 | 211139_s_at | D | NAB1   | NGFI-A binding protein 1                              | Nucleus             | transcription regulator           |                                                                                                                                                                |
| 2.34  | 0.000918 | 0.106 | 208047_s_at | D | NAB1   | NGFI-A binding protein 1                              | Nucleus             | transcription regulator           |                                                                                                                                                                |
| 1.68  | 0.0404   | 0.242 | 217739_s_at |   | NAMPT  | nicotinamide phosphoribosyltransferase                | Extracellular Space | cytokine                          | daporinad, KPT-9274                                                                                                                                            |
| 1.77  | 0.0282   | 0.214 | 217465_at   |   | NCKAP1 | NCK associated protein 1                              | Plasma Membrane     | other                             |                                                                                                                                                                |
| 1.52  | 0.00371  | 0.133 | 209105_at   |   | NCOA1  | nuclear receptor coactivator 1                        | Nucleus             | transcription regulator           |                                                                                                                                                                |
| 2.4   | 0.0024   | 0.122 | 205732_s_at |   | NCOA2  | nuclear receptor coactivator 2                        | Nucleus             | transcription regulator           |                                                                                                                                                                |
| 1.59  | 0.00762  | 0.152 | 218073_s_at |   | NDC1   | NDC1 transmembrane nucleoporin                        | Nucleus             | other                             |                                                                                                                                                                |
| -1.63 | 0.000385 | 0.102 | 220983_s_at | D | NEAT1  | nuclear paraspeckle assembly transcript 1             | Other               | other                             |                                                                                                                                                                |
| -2.14 | 0.0217   | 0.199 | 214657_s_at | D | NEAT1  | nuclear paraspeckle assembly transcript 1             | Other               | other                             |                                                                                                                                                                |
| 1.66  | 0.0247   | 0.207 | 207279_s_at |   | NEBL   | nebullette                                            | Plasma Membrane     | other                             |                                                                                                                                                                |
| -1.75 | 0.0123   | 0.17  | 215005_at   |   | NECAB2 | N-terminal EF-hand calcium binding protein 2          | Cytoplasm           | other                             |                                                                                                                                                                |
| -1.62 | 0.0228   | 0.202 | 201829_at   |   | NET1   | neuroepithelial cell transforming 1                   | Nucleus             | other                             |                                                                                                                                                                |
| -1.55 | 0.00804  | 0.154 | 222339_x_at |   | NFIX   | nuclear factor I X                                    | Nucleus             | transcription regulator           |                                                                                                                                                                |
| 1.9   | 0.000671 | 0.103 | 204107_at   |   | NFYA   | nuclear transcription factor Y subunit alpha          | Nucleus             | transcription regulator           |                                                                                                                                                                |
| 1.82  | 0.00597  | 0.145 | 218129_s_at |   | NFYB   | nuclear transcription factor Y subunit beta           | Nucleus             | transcription regulator           |                                                                                                                                                                |
| 1.56  | 0.00172  | 0.12  | 218036_x_at |   | NMD3   | NMD3 ribosome export adaptor                          | Nucleus             | other                             |                                                                                                                                                                |
| 2.69  | 0.0451   | 0.254 | 207400_at   |   | NPY5R  | neuropeptide Y receptor Y5                            | Plasma Membrane     | G-protein coupled receptor        |                                                                                                                                                                |
| 1.67  | 0.00523  | 0.141 | 215073_s_at | D | NR2F2  | nuclear receptor subfamily 2 group F member 2         | Nucleus             | ligand-dependent nuclear receptor |                                                                                                                                                                |
| 1.52  | 0.00914  | 0.158 | 209120_at   | D | NR2F2  | nuclear receptor subfamily 2 group F member 2         | Nucleus             | ligand-dependent nuclear receptor |                                                                                                                                                                |
| 4.03  | 0.0143   | 0.175 | 221796_at   |   | NTRK2  | neurotrophic receptor tyrosine kinase 2               | Plasma Membrane     | kinase                            | cabozantinib, cabozantinib/erlotinib, TSR-011, entrectinib, lorlatinib, PLX7486, larotrectinib, DS-6051b, TPX-0005, LOXO-195, ONO-7579, cabozantinib/nivolumab |
| -1.87 | 0.0327   | 0.225 | 200646_s_at | D | NUCB1  | nucleobindin 1                                        | Cytoplasm           | other                             |                                                                                                                                                                |
| -1.59 | 0.0346   | 0.229 | 200649_at   | D | NUCB1  | nucleobindin 1                                        | Cytoplasm           | other                             |                                                                                                                                                                |
| 1.58  | 0.00568  | 0.143 | 213461_at   |   | NUDT21 | nudix hydrolase 21                                    | Nucleus             | other                             |                                                                                                                                                                |

**Table K:** Time dependent changes in gene expression in TAC + MMF Group shown in Figure 8

|       |          |        |             |          |                                                                    |                 |                            |                                                                                                                                                                                                                                                                                                                  |
|-------|----------|--------|-------------|----------|--------------------------------------------------------------------|-----------------|----------------------------|------------------------------------------------------------------------------------------------------------------------------------------------------------------------------------------------------------------------------------------------------------------------------------------------------------------|
| -1.53 | 0.0295   | 0.218  | 214251_s_at | NUMA1    | nuclear mitotic apparatus protein 1                                | Nucleus         | other                      |                                                                                                                                                                                                                                                                                                                  |
| 2.15  | 0.00391  | 0.135  | 37079_at    | NUS1P3   | NUS1 pseudogene 3                                                  | Other           | other                      |                                                                                                                                                                                                                                                                                                                  |
| 2.19  | 0.00194  | 0.12   | 209629_s_at | NXT2     | nuclear transport factor 2 like export factor 2                    | Nucleus         | transporter                |                                                                                                                                                                                                                                                                                                                  |
| 1.69  | 0.0142   | 0.175  | 207564_x_at | OGT      | O-linked N-acetylglucosamine (GlcNAc) transferase                  | Cytoplasm       | enzyme                     |                                                                                                                                                                                                                                                                                                                  |
| 1.58  | 0.0346   | 0.229  | 203352_at   | ORC4     | origin recognition complex subunit 4                               | Nucleus         | other                      |                                                                                                                                                                                                                                                                                                                  |
| 1.7   | 0.0095   | 0.16   | 206637_at   | P2RY14   | purinergic receptor P2Y14                                          | Plasma Membrane | G-protein coupled receptor |                                                                                                                                                                                                                                                                                                                  |
| -1.69 | 0.042    | 0.245  | 202733_at   | P4HA2    | proyl 4-hydroxylase subunit alpha 2                                | Cytoplasm       | transporter                |                                                                                                                                                                                                                                                                                                                  |
| 1.5   | 0.0299   | 0.218  | 211547_s_at | PAFAH1B1 | platelet activating factor acetylhydrolase 1b regulatory subunit 1 | Cytoplasm       | enzyme                     |                                                                                                                                                                                                                                                                                                                  |
| 1.68  | 0.0433   | 0.249  | 208875_s_at | PAK2     | p21 (RAC1) activated kinase 2                                      | Cytoplasm       | kinase                     |                                                                                                                                                                                                                                                                                                                  |
| 1.56  | 0.000141 | 0.0846 | 212720_at   | PAPOLA   | poly(A) polymerase alpha                                           | Nucleus         | enzyme                     |                                                                                                                                                                                                                                                                                                                  |
| 1.57  | 0.0466   | 0.256  | 204005_s_at | PAWR     | pro-apoptotic WT1 regulator                                        | Nucleus         | transcription regulator    |                                                                                                                                                                                                                                                                                                                  |
| -2.01 | 0.00028  | 0.0977 | 213517_at   | PCBP2    | poly(rC) binding protein 2                                         | Nucleus         | other                      |                                                                                                                                                                                                                                                                                                                  |
| 1.62  | 0.0462   | 0.255  | 210674_s_at | PCDHA12  | protocadherin alpha 12                                             | Other           | other                      |                                                                                                                                                                                                                                                                                                                  |
| -1.52 | 0.00628  | 0.148  | 211713_x_at | PCLAF    | PCNA clamp associated factor                                       | Nucleus         | other                      |                                                                                                                                                                                                                                                                                                                  |
| 1.59  | 0.00595  | 0.145  | 209996_x_at | PCM1     | pericentriolar material 1                                          | Cytoplasm       | other                      |                                                                                                                                                                                                                                                                                                                  |
| 1.73  | 0.00424  | 0.136  | 202731_at   | D PDCD4  | programmed cell death 4                                            | Nucleus         | other                      |                                                                                                                                                                                                                                                                                                                  |
| 1.62  | 0.00649  | 0.148  | 202730_s_at | D PDCD4  | programmed cell death 4                                            | Nucleus         | other                      |                                                                                                                                                                                                                                                                                                                  |
| 1.56  | 0.00596  | 0.145  | 204735_at   | PDE4A    | phosphodiesterase 4A                                               | Cytoplasm       | enzyme                     | enprofylline, dyphylline, caffeine/ergotamine, arofylline, tetomilast, L 869298, ibudilast, apremilast, aspirin/dipyridamole/telmisartan, drotaverin, anagrelide, cilomilast, milrinone, dipyridamole, L-826,141, aspirin/dipyridamole, amrinone, ketotifen, roflumilast, theophylline, pentoxifylline, caffeine |
| 1.69  | 0.00172  | 0.12   | 211302_s_at | PDE4B    | phosphodiesterase 4B                                               | Cytoplasm       | enzyme                     | enprofylline, dyphylline, nitroglycerin, caffeine/ergotamine, arofylline, tetomilast, L 869298, ibudilast, apremilast, anagrelide, cilomilast, milrinone, dipyridamole, L-826,141, ketotifen, roflumilast, tolbutamide, papaverine, theophylline, pentoxifylline, caffeine                                       |
| -1.61 | 0.012    | 0.168  | 206792_x_at | PDE4C    | phosphodiesterase 4C                                               | Cytoplasm       | enzyme                     | dyphylline, nitroglycerin, caffeine/ergotamine, arofylline, tetomilast, L 869298, ibudilast, anagrelide, cilomilast, milrinone, dipyridamole, L-826,141, ketotifen, roflumilast, tolbutamide, theophylline, pentoxifylline, caffeine                                                                             |

**Table K:** Time dependent changes in gene expression in TAC + MMF Group shown in Figure 8

|       |          |        |             |   |         |                                                                         |                     |               |                  |
|-------|----------|--------|-------------|---|---------|-------------------------------------------------------------------------|---------------------|---------------|------------------|
| 1.69  | 0.0175   | 0.187  | 205463_s_at |   | PDGFA   | platelet derived growth factor subunit A                                | Extracellular Space | growth factor |                  |
| 1.85  | 0.00629  | 0.148  | 205960_at   |   | PDK4    | pyruvate dehydrogenase kinase 4                                         | Cytoplasm           | kinase        |                  |
| 1.65  | 0.0041   | 0.135  | 206288_at   |   | PGGT1B  | protein geranylgeranyltransferase type I subunit beta                   | Cytoplasm           | enzyme        |                  |
| -1.67 | 0.0281   | 0.214  | 219891_at   |   | PGPEP1  | pyroglutamyl-peptidase I                                                | Cytoplasm           | peptidase     |                  |
| 1.79  | 0.00136  | 0.114  | 209803_s_at |   | PHLDA2  | pleckstrin homology like domain family A member 2                       | Cytoplasm           | other         |                  |
| 1.74  | 0.00004  | 0.0655 | 204484_at   |   | PIK3C2B | phosphatidylinositol-4-phosphate 3-kinase catalytic subunit type 2 beta | Cytoplasm           | kinase        |                  |
| 1.64  | 0.00887  | 0.158  | 216218_s_at |   | PLCL2   | phospholipase C like 2                                                  | Cytoplasm           | enzyme        |                  |
| 1.53  | 0.00203  | 0.12   | 217677_at   |   | PLEKHA2 | pleckstrin homology domain containing A2                                | Cytoplasm           | other         |                  |
| -1.52 | 0.0265   | 0.211  | 220952_s_at |   | PLEKHA5 | pleckstrin homology domain containing A5                                | Cytoplasm           | other         |                  |
| -1.79 | 0.029    | 0.216  | 209122_at   |   | PLIN2   | perilipin 2                                                             | Plasma Membrane     | other         |                  |
| -1.76 | 0.0374   | 0.235  | 200827_at   |   | PLOD1   | procollagen-lysine,2-oxoglutarate 5-dioxygenase 1                       | Cytoplasm           | enzyme        |                  |
| -1.76 | 0.0333   | 0.227  | 214807_at   |   | PLXDC2  | plexin domain containing 2                                              | Extracellular Space | other         |                  |
| -1.54 | 0.00108  | 0.106  | 212705_x_at |   | PNPLA2  | patatin like phospholipase domain containing 2                          | Cytoplasm           | enzyme        |                  |
| -2.26 | 0.0447   | 0.252  | 220675_s_at |   | PNPLA3  | patatin like phospholipase domain containing 3                          | Cytoplasm           | enzyme        |                  |
| 1.5   | 0.0054   | 0.143  | 214374_s_at | D | PPFIBP1 | PPFIA binding protein 1                                                 | Plasma Membrane     | other         |                  |
| -1.56 | 0.0222   | 0.2    | 214375_at   | D | PPFIBP1 | PPFIA binding protein 1                                                 | Plasma Membrane     | other         |                  |
| 2.24  | 0.0327   | 0.225  | 213849_s_at |   | PPP2R2B | protein phosphatase 2 regulatory subunit Bbeta                          | Cytoplasm           | phosphatase   |                  |
| 1.57  | 0.00682  | 0.148  | 209799_at   |   | PRKAA1  | protein kinase AMP-activated catalytic subunit alpha 1                  | Cytoplasm           | kinase        | phenformin       |
| 1.89  | 0.000577 | 0.103  | 202742_s_at |   | PRKACB  | protein kinase cAMP-activated catalytic subunit beta                    | Cytoplasm           | kinase        |                  |
| 1.61  | 0.00472  | 0.138  | 206099_at   | D | PRKCH   | protein kinase C eta                                                    | Cytoplasm           | kinase        | ingenol mebutate |
| 1.61  | 0.0156   | 0.182  | 218764_at   | D | PRKCH   | protein kinase C eta                                                    | Cytoplasm           | kinase        | ingenol mebutate |
| 1.58  | 0.0141   | 0.175  | 209677_at   |   | PRKCI   | protein kinase C iota                                                   | Cytoplasm           | kinase        | ingenol mebutate |

**Table K:** Time dependent changes in gene expression in TAC + MMF Group shown in Figure 8

|       |          |       |             |   |          |                                                              |                     |                            |                                                                                                          |
|-------|----------|-------|-------------|---|----------|--------------------------------------------------------------|---------------------|----------------------------|----------------------------------------------------------------------------------------------------------|
| 1.53  | 0.0166   | 0.184 | 202529_at   |   | PRPSAP1  | phosphoribosyl pyrophosphate synthetase associated protein 1 | Extracellular Space | other                      |                                                                                                          |
| -1.78 | 0.00398  | 0.135 | 219392_x_at |   | PRR11    | proline rich 11                                              | Other               | other                      |                                                                                                          |
| 1.6   | 0.0233   | 0.203 | 219383_at   |   | PRR5L    | proline rich 5 like                                          | Cytoplasm           | other                      |                                                                                                          |
| 1.72  | 0.0133   | 0.173 | 206631_at   |   | PTGER2   | prostaglandin E receptor 2                                   | Plasma Membrane     | G-protein coupled receptor | misoprostol, prostaglandin E2, prostaglandin E1, CP 533536, diclofenac/misoprostol, EP2 receptor agonist |
| -2.22 | 0.0129   | 0.172 | 211909_x_at |   | PTGER3   | prostaglandin E receptor 3                                   | Plasma Membrane     | G-protein coupled receptor | misoprostol, prostaglandin E2, prostaglandin E1, diclofenac/misoprostol, bimatoprost                     |
| 1.89  | 0.000766 | 0.106 | 209896_s_at | D | PTPN11   | protein tyrosine phosphatase, non-receptor type 11           | Cytoplasm           | phosphatase                | TNO155, RMC-4630                                                                                         |
| 1.65  | 0.00301  | 0.125 | 209895_at   | D | PTPN11   | protein tyrosine phosphatase, non-receptor type 11           | Cytoplasm           | phosphatase                | TNO155, RMC-4630                                                                                         |
| 1.52  | 0.00278  | 0.122 | 200927_s_at |   | RAB14    | RAB14, member RAS oncogene family                            | Cytoplasm           | enzyme                     |                                                                                                          |
| 1.87  | 0.0272   | 0.212 | 210951_x_at | D | RAB27A   | RAB27A, member RAS oncogene family                           | Cytoplasm           | enzyme                     |                                                                                                          |
| 1.64  | 0.0307   | 0.22  | 209514_s_at | D | RAB27A   | RAB27A, member RAS oncogene family                           | Cytoplasm           | enzyme                     |                                                                                                          |
| 1.71  | 0.00166  | 0.12  | 201048_x_at |   | RAB6A    | RAB6A, member RAS oncogene family                            | Cytoplasm           | enzyme                     |                                                                                                          |
| 1.53  | 0.041    | 0.243 | 214552_s_at |   | RABEP1   | rabaptin, RAB GTPase binding effector protein 1              | Cytoplasm           | transporter                |                                                                                                          |
| 1.5   | 0.00266  | 0.122 | 210255_at   |   | RAD51B   | RAD51 paralog B                                              | Nucleus             | enzyme                     |                                                                                                          |
| 1.6   | 0.0208   | 0.198 | 216125_s_at |   | RANBP9   | RAN binding protein 9                                        | Nucleus             | other                      |                                                                                                          |
| 2.02  | 0.0466   | 0.256 | 213280_at   |   | RAP1GAP2 | RAP1 GTPase activating protein 2                             | Cytoplasm           | other                      |                                                                                                          |
| 1.59  | 0.0381   | 0.237 | 204681_s_at |   | RAPGEF5  | Rap guanine nucleotide exchange factor 5                     | Nucleus             | other                      |                                                                                                          |
| 1.84  | 0.00197  | 0.12  | 206636_at   |   | RASA2    | RAS p21 protein activator 2                                  | Cytoplasm           | other                      |                                                                                                          |
| 1.53  | 0.0104   | 0.162 | 212743_at   |   | RCHY1    | ring finger and CHY zinc finger domain containing 1          | Nucleus             | enzyme                     |                                                                                                          |
| 1.65  | 0.0311   | 0.221 | 218344_s_at |   | RCOR3    | REST corepressor 3                                           | Nucleus             | transcription regulator    |                                                                                                          |
| 1.72  | 0.0209   | 0.198 | 204128_s_at |   | RFC3     | replication factor C subunit 3                               | Nucleus             | enzyme                     |                                                                                                          |
| 1.53  | 0.00101  | 0.106 | 218430_s_at |   | RFX7     | regulatory factor X7                                         | Other               | other                      |                                                                                                          |
| -2.02 | 0.0324   | 0.225 | 218723_s_at |   | RGCC     | regulator of cell cycle                                      | Cytoplasm           | other                      |                                                                                                          |
| -1.66 | 0.0111   | 0.166 | 215588_x_at | D | RIOK3    | RIO kinase 3                                                 | Cytoplasm           | kinase                     |                                                                                                          |
| 1.52  | 0.0135   | 0.174 | 202129_s_at | D | RIOK3    | RIO kinase 3                                                 | Cytoplasm           | kinase                     |                                                                                                          |
| 1.62  | 0.00512  | 0.141 | 218425_at   |   | RNF216   | ring finger protein 216                                      | Cytoplasm           | enzyme                     |                                                                                                          |
| 1.54  | 0.0138   | 0.174 | 220788_s_at |   | RNF31    | ring finger protein 31                                       | Cytoplasm           | enzyme                     |                                                                                                          |
| -1.55 | 0.000701 | 0.105 | 213642_at   |   | RPL27    | ribosomal protein L27                                        | Cytoplasm           | other                      |                                                                                                          |



**Table K:** Time dependent changes in gene expression in TAC + MMF Group shown in Figure 8

|       |         |       |             |   |          |                                        |                     |                         |  |
|-------|---------|-------|-------------|---|----------|----------------------------------------|---------------------|-------------------------|--|
| 1.56  | 0.0415  | 0.244 | 220738_s_at |   | RPS6KA6  | ribosomal protein S6 kinase A6         | Cytoplasm           | kinase                  |  |
| 1.57  | 0.0266  | 0.211 | 219684_at   |   | RTP4     | receptor transporter protein 4         | Plasma Membrane     | other                   |  |
| -2.02 | 0.00312 | 0.126 | 213939_s_at | D | RUFY3    | RUN and FYVE domain containing 3       | Plasma Membrane     | other                   |  |
| -1.7  | 0.00491 | 0.14  | 213430_at   | D | RUFY3    | RUN and FYVE domain containing 3       | Plasma Membrane     | other                   |  |
| 1.64  | 0.0393  | 0.239 | 204198_s_at |   | RUNX3    | runt related transcription factor 3    | Nucleus             | transcription regulator |  |
| 1.54  | 0.001   | 0.106 | 215064_at   |   | SC5D     | sterol-C5-desaturase                   | Cytoplasm           | enzyme                  |  |
| 1.66  | 0.00622 | 0.147 | 212311_at   | D | SEL1L3   | SEL1L family member 3                  | Nucleus             | other                   |  |
| 1.74  | 0.0134  | 0.173 | 212314_at   | D | SEL1L3   | SEL1L family member 3                  | Nucleus             | other                   |  |
| 2.33  | 0.00319 | 0.127 | 220735_s_at |   | SENP7    | SUMO specific peptidase 7              | Nucleus             | peptidase               |  |
| 2.1   | 0.00524 | 0.141 | 212415_at   |   | SEPT6    | septin 6                               | Cytoplasm           | other                   |  |
| 1.54  | 0.00963 | 0.16  | 216899_s_at |   | SKAP2    | src kinase associated phosphoprotein 2 | Cytoplasm           | other                   |  |
| -2.43 | 0.021   | 0.198 | 219915_s_at |   | SLC16A10 | solute carrier family 16 member 10     | Plasma Membrane     | transporter             |  |
| -1.95 | 0.00854 | 0.157 | 207444_at   |   | SLC22A13 | solute carrier family 22 member 13     | Plasma Membrane     | transporter             |  |
| 1.66  | 0.002   | 0.12  | 205421_at   |   | SLC22A3  | solute carrier family 22 member 3      | Plasma Membrane     | transporter             |  |
| -2.5  | 0.0307  | 0.22  | 205896_at   |   | SLC22A4  | solute carrier family 22 member 4      | Plasma Membrane     | transporter             |  |
| -1.52 | 0.014   | 0.175 | 210686_x_at |   | SLC25A16 | solute carrier family 25 member 16     | Cytoplasm           | transporter             |  |
| -1.52 | 0.0083  | 0.156 | 201917_s_at |   | SLC25A36 | solute carrier family 25 member 36     | Cytoplasm           | transporter             |  |
| -1.55 | 0.0036  | 0.132 | 203971_at   |   | SLC31A1  | solute carrier family 31 member 1      | Plasma Membrane     | transporter             |  |
| -3.77 | 0.0457  | 0.254 | 217530_at   |   | SLC34A1  | solute carrier family 34 member 1      | Plasma Membrane     | transporter             |  |
| -1.61 | 0.00092 | 0.106 | 209711_at   |   | SLC35D1  | solute carrier family 35 member D1     | Cytoplasm           | transporter             |  |
| -1.77 | 0.0141  | 0.175 | 220796_x_at |   | SLC35E1  | solute carrier family 35 member E1     | Cytoplasm           | other                   |  |
| 1.56  | 0.0354  | 0.231 | 216504_s_at |   | SLC39A8  | solute carrier family 39 member 8      | Extracellular Space | transporter             |  |
| 1.65  | 0.0395  | 0.239 | 217859_s_at |   | SLC39A9  | solute carrier family 39 member 9      | Other               | transporter             |  |
| -2.91 | 0.0254  | 0.209 | 210739_x_at |   | SLC4A4   | solute carrier family 4 member 4       | Plasma Membrane     | transporter             |  |
| -1.75 | 0.0139  | 0.174 | 216603_at   | D | SLC7A8   | solute carrier family 7 member 8       | Plasma Membrane     | transporter             |  |
| -2.36 | 0.0209  | 0.198 | 217248_s_at | D | SLC7A8   | solute carrier family 7 member 8       | Plasma Membrane     | transporter             |  |

**Table K:** Time dependent changes in gene expression in TAC + MMF Group shown in Figure 8

|       |          |       |             |   |         |                                                                                                   |                     |                         |  |
|-------|----------|-------|-------------|---|---------|---------------------------------------------------------------------------------------------------|---------------------|-------------------------|--|
| -2.53 | 0.0226   | 0.202 | 216604_s_at | D | SLC7A8  | solute carrier family 7 member 8                                                                  | Plasma Membrane     | transporter             |  |
| 1.93  | 0.0396   | 0.24  | 219229_at   |   | SLCO3A1 | solute carrier organic anion transporter family member 3A1                                        | Plasma Membrane     | transporter             |  |
| 1.51  | 0.0468   | 0.256 | 203813_s_at |   | SLIT3   | slit guidance ligand 3                                                                            | Extracellular Space | other                   |  |
| 1.51  | 0.0104   | 0.163 | 205188_s_at |   | SMAD5   | SMAD family member 5                                                                              | Nucleus             | transcription regulator |  |
| 1.6   | 0.00561  | 0.143 | 212257_s_at | D | SMARCA2 | SWI/SNF related, matrix associated, actin dependent regulator of chromatin, subfamily a, member 2 | Nucleus             | transcription regulator |  |
| 1.67  | 0.0164   | 0.184 | 206544_x_at | D | SMARCA2 | SWI/SNF related, matrix associated, actin dependent regulator of chromatin, subfamily a, member 2 | Nucleus             | transcription regulator |  |
| 1.57  | 0.0343   | 0.229 | 204240_s_at |   | SMC2    | structural maintenance of chromosomes 2                                                           | Nucleus             | transporter             |  |
| 1.75  | 0.00978  | 0.16  | 212577_at   | D | SMCHD1  | structural maintenance of chromosomes flexible hinge domain containing 1                          | Nucleus             | enzyme                  |  |
| 1.52  | 0.019    | 0.192 | 212569_at   | D | SMCHD1  | structural maintenance of chromosomes flexible hinge domain containing 1                          | Nucleus             | enzyme                  |  |
| 1.57  | 0.00131  | 0.113 | 218032_at   |   | SNN     | stannin                                                                                           | Plasma Membrane     | other                   |  |
| -1.54 | 0.000904 | 0.106 | 217040_x_at |   | SOX15   | SRY-box 15                                                                                        | Nucleus             | transcription regulator |  |
| 1.93  | 0.037    | 0.234 | 219993_at   |   | SOX17   | SRY-box 17                                                                                        | Nucleus             | transcription regulator |  |
| 1.75  | 0.0193   | 0.192 | 201417_at   |   | SOX4    | SRY-box 4                                                                                         | Nucleus             | transcription regulator |  |
| 1.52  | 0.00889  | 0.158 | 207724_s_at |   | SPAST   | spastin                                                                                           | Nucleus             | enzyme                  |  |
| 1.51  | 0.00585  | 0.144 | 220299_at   |   | SPATA6  | spermatogenesis associated 6                                                                      | Cytoplasm           | other                   |  |
| 1.55  | 0.0116   | 0.168 | 218817_at   |   | SPCS3   | signal peptidase complex subunit 3                                                                | Cytoplasm           | peptidase               |  |
| -7.45 | 0.0479   | 0.259 | 206239_s_at |   | SPINK1  | serine peptidase inhibitor, Kazal type 1                                                          | Extracellular Space | other                   |  |
| 1.62  | 0.0323   | 0.224 | 216202_s_at |   | SPTLC2  | serine palmitoyltransferase long chain base subunit 2                                             | Cytoplasm           | enzyme                  |  |
| 1.72  | 0.00636  | 0.148 | 201742_x_at |   | SRSF1   | serine and arginine rich splicing factor 1                                                        | Nucleus             | other                   |  |

**Table K:** Time dependent changes in gene expression in TAC + MMF Group shown in Figure 8

|       |          |       |             |   |         |                                                    |                     |                            |                                                                                                                                                                                                                                                                        |
|-------|----------|-------|-------------|---|---------|----------------------------------------------------|---------------------|----------------------------|------------------------------------------------------------------------------------------------------------------------------------------------------------------------------------------------------------------------------------------------------------------------|
| -1.88 | 0.00149  | 0.117 | 213742_at   |   | SRSF11  | serine and arginine rich splicing factor 11        | Nucleus             | other                      |                                                                                                                                                                                                                                                                        |
| 1.51  | 0.0184   | 0.19  | 202816_s_at |   | SS18    | SS18, nBAF chromatin remodeling complex subunit    | Nucleus             | transcription regulator    |                                                                                                                                                                                                                                                                        |
| -1.68 | 0.00518  | 0.141 | 214597_at   |   | SSTR2   | somatostatin receptor 2                            | Plasma Membrane     | G-protein coupled receptor | pasireotide, BIM 23A760, edotreotide, octreotide/prednisone, everolimus/pasireotide, 177Lu-edotreotide, haloperidol/octreotide, XmAb18087, dexamethasone/metoclopramide/octreotide, methylprednisolone/octreotide, octreotide/prochlorperazine, lanreotide, octreotide |
| -1.61 | 0.00862  | 0.157 | 207871_s_at |   | ST7     | suppression of tumorigenicity 7                    | Other               | other                      |                                                                                                                                                                                                                                                                        |
| 1.87  | 0.0272   | 0.212 | 206118_at   |   | STAT4   | signal transducer and activator of transcription 4 | Nucleus             | transcription regulator    |                                                                                                                                                                                                                                                                        |
| 1.73  | 0.00451  | 0.137 | 202695_s_at | D | STK17A  | serine/threonine kinase 17a                        | Nucleus             | kinase                     |                                                                                                                                                                                                                                                                        |
| 1.53  | 0.0288   | 0.216 | 202693_s_at | D | STK17A  | serine/threonine kinase 17a                        | Nucleus             | kinase                     |                                                                                                                                                                                                                                                                        |
| 1.5   | 0.012    | 0.168 | 212800_at   |   | STX6    | syntaxin 6                                         | Cytoplasm           | transporter                |                                                                                                                                                                                                                                                                        |
| 2.4   | 0.0301   | 0.219 | 203999_at   |   | SYT1    | synaptotagmin 1                                    | Cytoplasm           | transporter                |                                                                                                                                                                                                                                                                        |
| 1.8   | 0.00233  | 0.122 | 221618_s_at |   | TAF9B   | TATA-box binding protein associated factor 9b      | Nucleus             | transcription regulator    |                                                                                                                                                                                                                                                                        |
| 1.95  | 0.0061   | 0.146 | 210458_s_at |   | TANK    | TRAF family member associated NFKB activator       | Cytoplasm           | other                      |                                                                                                                                                                                                                                                                        |
| 1.5   | 0.00243  | 0.122 | 221428_s_at |   | TBL1XR1 | transducin beta like 1 X-linked receptor 1         | Nucleus             | transcription regulator    |                                                                                                                                                                                                                                                                        |
| 1.53  | 0.0138   | 0.174 | 216511_s_at |   | TCF7L2  | transcription factor 7 like 2                      | Nucleus             | transcription regulator    |                                                                                                                                                                                                                                                                        |
| 1.54  | 0.0455   | 0.254 | 214862_x_at |   | TET1    | tet methylcytosine dioxygenase 1                   | Nucleus             | enzyme                     |                                                                                                                                                                                                                                                                        |
| 1.69  | 0.000845 | 0.106 | 204147_s_at |   | TFDP1   | transcription factor Dp-1                          | Nucleus             | transcription regulator    |                                                                                                                                                                                                                                                                        |
| 1.59  | 0.0286   | 0.215 | 209676_at   |   | TFPI    | tissue factor pathway inhibitor                    | Extracellular Space | other                      | dalteparin                                                                                                                                                                                                                                                             |
| 3.19  | 0.0178   | 0.188 | 209278_s_at |   | TFPI2   | tissue factor pathway inhibitor 2                  | Extracellular Space | other                      |                                                                                                                                                                                                                                                                        |
| -1.88 | 0.0306   | 0.22  | 208691_at   |   | TFRC    | transferrin receptor                               | Plasma Membrane     | transporter                | CALAA-01                                                                                                                                                                                                                                                               |
| -1.6  | 0.0313   | 0.222 | 212040_at   |   | TGOLN2  | trans-golgi network protein 2                      | Cytoplasm           | other                      |                                                                                                                                                                                                                                                                        |
| 1.56  | 0.0383   | 0.238 | 201109_s_at |   | THBS1   | thrombospondin 1                                   | Extracellular Space | other                      |                                                                                                                                                                                                                                                                        |
| -1.95 | 0.00931  | 0.16  | 213869_x_at | D | THY1    | Thy-1 cell surface antigen                         | Plasma Membrane     | other                      |                                                                                                                                                                                                                                                                        |
| -1.8  | 0.0153   | 0.181 | 208850_s_at | D | THY1    | Thy-1 cell surface antigen                         | Plasma Membrane     | other                      |                                                                                                                                                                                                                                                                        |
| -1.89 | 0.016    | 0.183 | 208851_s_at | D | THY1    | Thy-1 cell surface antigen                         | Plasma Membrane     | other                      |                                                                                                                                                                                                                                                                        |

**Table K:** Time dependent changes in gene expression in TAC + MMF Group shown in Figure 8

|       |          |       |             |   |           |                                                                 |                 |                         |                                                                               |
|-------|----------|-------|-------------|---|-----------|-----------------------------------------------------------------|-----------------|-------------------------|-------------------------------------------------------------------------------|
| 2.15  | 0.0365   | 0.233 | 204468_s_at |   | TIE1      | tyrosine kinase with immunoglobulin like and EGF like domains 1 | Plasma Membrane | kinase                  |                                                                               |
| 1.65  | 0.000981 | 0.106 | 214168_s_at |   | TJP1      | tight junction protein 1                                        | Plasma Membrane | other                   |                                                                               |
| 1.5   | 0.00699  | 0.149 | 203221_at   | D | TLE1      | transducin like enhancer of split 1                             | Nucleus         | transcription regulator |                                                                               |
| 1.73  | 0.0122   | 0.169 | 203222_s_at | D | TLE1      | transducin like enhancer of split 1                             | Nucleus         | transcription regulator |                                                                               |
| 1.84  | 0.00178  | 0.12  | 210379_s_at | D | TLK1      | tousled like kinase 1                                           | Nucleus         | kinase                  |                                                                               |
| 2.02  | 0.00253  | 0.122 | 211077_s_at | D | TLK1      | tousled like kinase 1                                           | Nucleus         | kinase                  |                                                                               |
| 1.72  | 0.00304  | 0.125 | 209387_s_at | D | TM4SF1    | transmembrane 4 L six family member 1                           | Plasma Membrane | other                   |                                                                               |
| 1.54  | 0.00733  | 0.15  | 209386_at   | D | TM4SF1    | transmembrane 4 L six family member 1                           | Plasma Membrane | other                   |                                                                               |
| 1.7   | 0.00968  | 0.16  | 215034_s_at | D | TM4SF1    | transmembrane 4 L six family member 1                           | Plasma Membrane | other                   |                                                                               |
| 1.52  | 0.049    | 0.261 | 204427_s_at |   | TMED2     | transmembrane p24 trafficking protein 2                         | Cytoplasm       | transporter             |                                                                               |
| 1.57  | 0.0138   | 0.174 | 209655_s_at |   | TMEM47    | transmembrane protein 47                                        | Plasma Membrane | other                   |                                                                               |
| 1.57  | 0.0277   | 0.213 | 65630_at    |   | TMEM80    | transmembrane protein 80                                        | Other           | other                   |                                                                               |
| 1.68  | 0.00131  | 0.113 | 209753_s_at | D | TMPO      | thymopoietin                                                    | Nucleus         | other                   |                                                                               |
| 2.14  | 0.00952  | 0.16  | 209754_s_at | D | TMPO      | thymopoietin                                                    | Nucleus         | other                   |                                                                               |
| 1.51  | 0.044    | 0.25  | 203432_at   | D | TMPO      | thymopoietin                                                    | Nucleus         | other                   |                                                                               |
| 1.66  | 0.00192  | 0.12  | 208097_s_at |   | TMX1      | thioredoxin related transmembrane protein 1                     | Cytoplasm       | enzyme                  |                                                                               |
| 1.64  | 0.00614  | 0.146 | 210260_s_at | D | TNFAIP8   | TNF alpha induced protein 8                                     | Cytoplasm       | other                   |                                                                               |
| 1.51  | 0.0198   | 0.194 | 208296_x_at | D | TNFAIP8   | TNF alpha induced protein 8                                     | Cytoplasm       | other                   |                                                                               |
| -1.86 | 0.00966  | 0.16  | 207730_x_at |   | TNFAIP8L1 | TNF alpha induced protein 8 like 1                              | Cytoplasm       | other                   |                                                                               |
| 1.56  | 0.00243  | 0.122 | 216100_s_at |   | TOR1AIP1  | torsin 1A interacting protein 1                                 | Nucleus         | other                   |                                                                               |
| 1.56  | 0.00152  | 0.118 | 201746_at   |   | TP53      | tumor protein p53                                               | Nucleus         | transcription regulator | APR-246, cenersen, ALT-801, CGM097, kevetrin, azurin 50-77, COTI-2, BI 907828 |
| -1.82 | 0.0247   | 0.207 | 217914_at   |   | TPCN1     | two pore segment channel 1                                      | Plasma Membrane | ion channel             |                                                                               |
| 1.55  | 0.0158   | 0.183 | 221218_s_at |   | TPK1      | thiamin pyrophosphokinase 1                                     | Cytoplasm       | kinase                  |                                                                               |
| 2.08  | 0.0322   | 0.224 | 209670_at   | D | TRAC      | T cell receptor alpha constant                                  | Plasma Membrane | other                   |                                                                               |
| 2.44  | 0.0386   | 0.238 | 210972_x_at | D | TRAC      | T cell receptor alpha constant                                  | Plasma Membrane | other                   |                                                                               |
| 1.69  | 0.0329   | 0.226 | 205804_s_at |   | TRAF3IP3  | TRAF3 interacting protein 3                                     | Other           | other                   |                                                                               |

**Table K:** Time dependent changes in gene expression in TAC + MMF Group shown in Figure 8

|       |          |        |             |   |        |                                                        |                     |                         |             |
|-------|----------|--------|-------------|---|--------|--------------------------------------------------------|---------------------|-------------------------|-------------|
| 2.92  | 0.00757  | 0.151  | 210915_x_at | D | TRBC1  | T cell receptor beta constant 1                        | Plasma Membrane     | other                   |             |
| 4.12  | 0.0165   | 0.184  | 211796_s_at | D | TRBC1  | T cell receptor beta constant 1                        | Plasma Membrane     | other                   |             |
| 2.23  | 0.0263   | 0.21   | 213193_x_at | D | TRBC1  | T cell receptor beta constant 1                        | Plasma Membrane     | other                   |             |
| 1.69  | 0.0274   | 0.213  | 206308_at   |   | TRDMT1 | tRNA aspartic acid methyltransferase 1                 | Nucleus             | enzyme                  |             |
| 1.62  | 0.00691  | 0.149  | 202479_s_at |   | TRIB2  | tribbles pseudokinase 2                                | Plasma Membrane     | kinase                  |             |
| 1.61  | 0.00758  | 0.151  | 205150_s_at |   | TRIL   | TLR4 interactor with leucine rich repeats              | Other               | other                   |             |
| 1.72  | 0.0248   | 0.207  | 214908_s_at |   | TRRAP  | transformation/transcription domain associated protein | Nucleus             | transcription regulator |             |
| -1.55 | 0.0097   | 0.16   | 218245_at   |   | TSKU   | tsukushi, small leucine rich proteoglycan              | Extracellular Space | other                   |             |
| 1.59  | 0.0038   | 0.134  | 214007_s_at |   | TWF1   | twinfilin actin binding protein 1                      | Cytoplasm           | kinase                  |             |
| -1.51 | 0.0103   | 0.162  | 216609_at   |   | TXN    | thioredoxin                                            | Cytoplasm           | enzyme                  | PX-12       |
| 1.51  | 0.00811  | 0.155  | 208760_at   |   | UBE2I  | ubiquitin conjugating enzyme E2 I                      | Nucleus             | enzyme                  |             |
| 1.5   | 0.00569  | 0.143  | 202316_x_at |   | UBE4B  | ubiquitination factor E4B                              | Cytoplasm           | enzyme                  |             |
| 1.51  | 0.0184   | 0.19   | 204062_s_at |   | ULK2   | unc-51 like autophagy activating kinase 2              | Cytoplasm           | kinase                  |             |
| -2.43 | 0.0233   | 0.204  | 221173_at   |   | USH1C  | USH1 protein network component harmonin                | Plasma Membrane     | other                   |             |
| 1.75  | 0.00122  | 0.11   | 215886_x_at |   | USP12  | ubiquitin specific peptidase 12                        | Cytoplasm           | peptidase               |             |
| 1.57  | 0.0282   | 0.214  | 212381_at   |   | USP24  | ubiquitin specific peptidase 24                        | Nucleus             | peptidase               |             |
| 1.52  | 0.000174 | 0.0907 | 212065_s_at |   | USP34  | ubiquitin specific peptidase 34                        | Extracellular Space | peptidase               |             |
| 2.2   | 0.00242  | 0.122  | 206624_at   |   | USP9Y  | ubiquitin specific peptidase 9 Y-linked                | Cytoplasm           | peptidase               |             |
| 1.79  | 0.00619  | 0.147  | 205139_s_at |   | UST    | uronyl 2-sulfotransferase                              | Cytoplasm           | enzyme                  |             |
| 2.33  | 0.000788 | 0.106  | 213023_at   | D | UTRN   | utrophin                                               | Plasma Membrane     | transmembrane receptor  |             |
| 2.24  | 0.0015   | 0.117  | 213022_s_at | D | UTRN   | utrophin                                               | Plasma Membrane     | transmembrane receptor  |             |
| 1.51  | 0.00908  | 0.158  | 219330_at   |   | VANGL1 | VANGL planar cell polarity protein 1                   | Cytoplasm           | other                   |             |
| 1.51  | 0.0494   | 0.263  | 209822_s_at |   | VLDLR  | very low density lipoprotein receptor                  | Plasma Membrane     | transporter             |             |
| 1.86  | 0.0172   | 0.187  | 215711_s_at |   | WEE1   | WEE1 G2 checkpoint kinase                              | Nucleus             | kinase                  | adavosertib |
| -1.83 | 0.00188  | 0.12   | 206213_at   |   | WNT10B | Wnt family member 10B                                  | Extracellular Space | other                   |             |

**Table K:** Time dependent changes in gene expression in TAC + MMF Group shown in Figure 8

|       |          |        |             |   |         |                                          |                     |                         |  |
|-------|----------|--------|-------------|---|---------|------------------------------------------|---------------------|-------------------------|--|
| 1.59  | 0.0218   | 0.199  | 205990_s_at | D | WNT5A   | Wnt family member 5A                     | Extracellular Space | cytokine                |  |
| 2.11  | 0.0421   | 0.246  | 213425_at   | D | WNT5A   | Wnt family member 5A                     | Extracellular Space | cytokine                |  |
| -1.57 | 0.0121   | 0.169  | 71933_at    |   | WNT6    | Wnt family member 6                      | Extracellular Space | other                   |  |
| 2.49  | 0.0349   | 0.229  | 206366_x_at |   | XCL1    | X-C motif chemokine ligand 1             | Extracellular Space | cytokine                |  |
| 2.83  | 0.0276   | 0.213  | 214567_s_at |   | XCL2    | X-C motif chemokine ligand 2             | Extracellular Space | cytokine                |  |
| -1.58 | 0.00901  | 0.158  | 207598_x_at |   | XRCC2   | X-ray repair cross complementing 2       | Nucleus             | enzyme                  |  |
| 1.64  | 0.000004 | 0.0515 | 214659_x_at |   | YLPM1   | YLP motif containing 1                   | Nucleus             | transcription regulator |  |
| 1.67  | 0.0464   | 0.256  | 211902_x_at |   | YME1L1  | YME1 like 1 ATPase                       | Cytoplasm           | peptidase               |  |
| -1.61 | 0.0299   | 0.218  | 222357_at   |   | ZBTB20  | zinc finger and BTB domain containing 20 | Nucleus             | transcription regulator |  |
| -2.1  | 0.0151   | 0.18   | 206169_x_at |   | ZC3H7B  | zinc finger CCCH-type containing 7B      | Nucleus             | other                   |  |
| 1.76  | 0.0182   | 0.189  | 219247_s_at |   | ZDHHC14 | zinc finger DHHC-type containing 14      | Cytoplasm           | enzyme                  |  |
| 1.5   | 0.00266  | 0.122  | 217741_s_at |   | ZFAND5  | zinc finger AN1-type containing 5        | Nucleus             | other                   |  |
| 1.55  | 0.0326   | 0.225  | 207068_at   |   | ZFP37   | ZFP37 zinc finger protein                | Nucleus             | transcription regulator |  |
| 1.73  | 0.022    | 0.2    | 202137_s_at |   | ZMYND11 | zinc finger MYND-type containing 11      | Nucleus             | transcription regulator |  |
| -1.69 | 0.0201   | 0.195  | 214715_x_at |   | ZNF160  | zinc finger protein 160                  | Nucleus             | transcription regulator |  |
| 1.6   | 0.0019   | 0.12   | 207304_at   |   | ZNF45   | zinc finger protein 45                   | Nucleus             | transcription regulator |  |
| 1.99  | 0.000863 | 0.106  | 222283_at   |   | ZNF480  | zinc finger protein 480                  | Nucleus             | transcription regulator |  |
| 2.76  | 0.0144   | 0.175  | 207781_s_at |   | ZNF711  | zinc finger protein 711                  | Nucleus             | transcription regulator |  |
